# Supplementary material
Source: MDPI journal article supplement (https://www.mdpi.com/2306-5729/8/5/92)
Supplement: s1 [file s1]

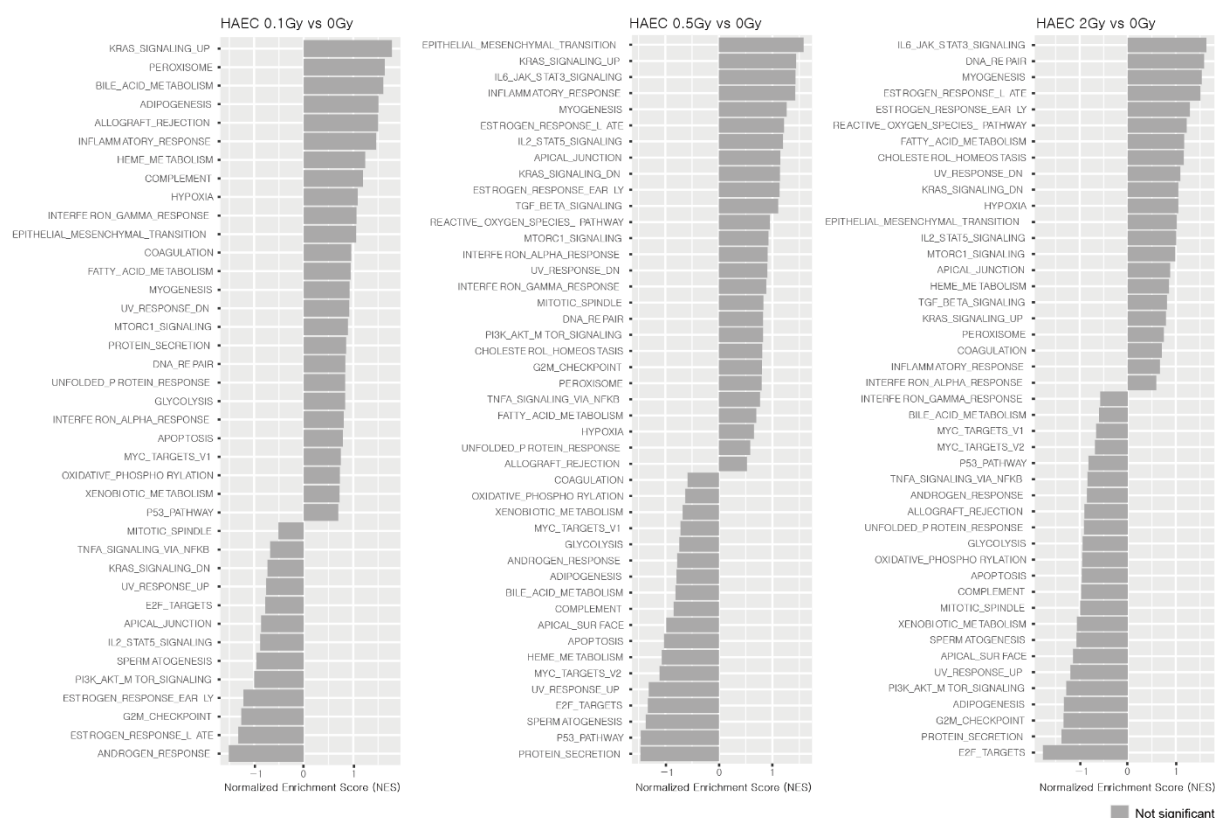

**Figure S1.** Identification of radiation-responsive pathways and associated genes at low doses in HAEC cells. (a) Enriched pathways based on the overall expression patterns of the provided comparisons are presented. None of the pathways reached the significance cutoff of a q-value (adjusted p-value) of 0.05.
