# Supplementary material
Source: MDPI journal article supplement (https://www.mdpi.com/2306-5729/8/5/92)
Supplement: s1 [file s1]

Archive with 4 entries (4 files):
- Figure_S1.pdf
- Table_S1.xlsx
- Table_S2.xlsx
- Table_S3.xlsx
