# Supplementary material
Source: MDPI journal article supplement (https://www.mdpi.com/2306-5729/8/5/92)
Supplement: s1 [file s1 › Table_S1.xlsx]

## Sheet: TPM_table
Table S1. Normalized expression levels of known genes in all samples
	T2D-HAEC 0Gy rep1	T2D-HAEC 0Gy rep2	T2D-HAEC 0.1Gy rep1	T2D-HAEC 0.1Gy rep2	T2D-HAEC 0.5Gy rep1	T2D-HAEC 0.5Gy rep2	T2D-HAEC 2Gy rep1	T2D-HAEC 2Gy rep2	HAEC 0Gy rep1	HAEC 0Gy rep2	HAEC 0.1Gy rep1	HAEC 0.1Gy rep2	HAEC 0.5Gy rep1	HAEC 0.5Gy rep2	HAEC 2Gy rep1	HAEC 2Gy rep2
ENSG00000000003.15|TSPAN6	23.7809	21.6538	20.1597	25.0923	26.2777	24.8648	24.3845	21.4201	17.6371	16.6546	16.3748	16.248	17.7109	15.86	18.6534	18.0451
ENSG00000000005.6|TNMD	0	0	0	0	0	0	0.538518	0	0	0	0	0	0	0	0	0
ENSG00000000419.14|DPM1	56.5888	56.8255	56.2643	67.7718	70.87	63.7117	66.1747	67.0329	61.395	70.0418	66.8903	69.1786	74.6728	62.451	74.41	70.1769
ENSG00000000457.14|SCYL3	3.19342	3.57832	2.65761	3.91428	4.32123	3.8673	2.99083	3.64315	2.68046	2.75517	2.16609	2.91519	2.97937	3.3625	2.69245	2.43325
ENSG00000000460.17|C1orf112	1.82181	2.33384	2.18554	2.0462	1.83769	3.14534	1.79109	2.64874	6.35247	7.42226	4.78659	7.26194	5.62533	5.21701	4.06768	4.66169
ENSG00000000938.13|FGR	0	0	0	0	0.108459	0	0	0	0.194506	0.314204	0.07027	0.22756	0	0	0.176651	0
ENSG00000000971.16|CFH	51.9845	49.5067	48.8172	43.6951	60.2059	61.8855	53.9522	53.6423	18.289	16.5683	18.2839	18.9066	26.7721	23.1799	23.9467	23.8658
ENSG00000001036.14|FUCA2	61.431	58.0099	49.2689	56.0907	65.0764	60.62	65.315	55.6718	68.4615	73.9304	61.4293	64.7255	64.5645	67.8048	63.9826	71.0172
ENSG00000001084.13|GCLC	21.4781	19.3467	21.1457	20.3447	28.2492	25.5645	23.3992	23.415	13.3875	11.9873	12.0268	11.107	11.6808	11.7897	11.8272	13.051
ENSG00000001167.15|NFYA	9.38899	7.26571	7.2619	11.2045	7.12216	10.1491	11.39	10.4037	11.4538	10.0542	9.54022	9.94271	12.8545	13.84	11.6085	13.1709
ENSG00000001460.18|STPG1	9.92184	6.34452	6.12868	8.15893	2.9991	6.13225	1.81608	6.29114	7.52555	7.91331	6.91887	8.21227	7.9279	6.61342	5.61604	6.0036
ENSG00000001461.17|NIPAL3	25.4748	26.9405	27.3072	28.2615	26.7841	26.7294	28.2469	26.626	19.6075	18.0703	17.2435	16.7651	19.3613	21.2922	15.73	19.1265
ENSG00000001497.18|LAS1L	24.6618	25.3186	30.7252	29.1619	32.0327	23.7344	30.4446	26.2167	39.0621	37.6648	38.1677	34.2411	34.8059	32.9301	36.4902	35.5433
ENSG00000001561.7|ENPP4	6.61978	4.72896	5.97947	7.14618	6.12136	6.08296	7.79958	7.3702	3.10227	3.02151	3.5395	2.68828	3.32678	3.76991	2.62825	3.85397
ENSG00000001617.12|SEMA3F	81.8841	63.7746	74.5728	71.6979	78.4687	76.9199	79.1063	81.2137	104.562	101.184	111.463	105.289	97.9445	106.984	82.3669	98.9182
ENSG00000001626.16|CFTR	0	0	0	0	0.02404	0.016272	0	0.008264	0	0.299223	0	0	0	0	0	0
ENSG00000001629.10|ANKIB1	33.7155	31.2068	32.7868	40.4097	37.6066	39.6262	40.1019	37.1502	23.8368	27.1818	27.9667	28.1275	36.5076	36.0645	30.8904	41.027
ENSG00000001630.17|CYP51A1	34.668	33.0741	32.0659	34.0689	33.3508	33.9409	38.2434	34.364	53.0091	48.5833	59.0539	49.8311	59.4917	57.97	56.4396	65.3047
ENSG00000001631.16|KRIT1	24.9581	31.5621	34.2186	36.0295	23.5899	29.9299	30.304	27.7654	16.6219	25.0498	14.1048	17.7955	18.2415	18.4129	22.3471	25.0421
ENSG00000002016.18|RAD52	11.5921	13.6714	11.8134	19.3144	12.8238	18.7903	19.3132	14.4491	5.21511	7.64959	3.03256	4.45896	3.58723	3.15375	5.62954	4.85076
ENSG00000002079.14|MYH16	0.406485	0.643773	0.338537	1.10475	1.39026	0.93404	0.335195	0.440958	0.584347	0.633668	0.490968	0.572882	0.599729	0.425545	0.148948	0.089539
ENSG00000002330.14|BAD	94.4984	88.1645	104.861	81.7845	86.4594	88.7812	91.9175	90.6965	89.2777	76.3875	80.3245	80.2096	83.8449	83.0393	80.9691	79.9973
ENSG00000002549.13|LAP3	159.566	154.676	113.08	138.223	153.099	163.802	162.181	144.83	146.392	142.21	171.697	177.179	166.761	170.515	144.128	151.856
ENSG00000002586.20_PAR_Y|CD99	561.898	574.362	529.15	554.475	609.352	610.454	566.241	588.965	318.461	340.328	327.173	354.116	324.803	338.294	338.066	325.297
ENSG00000002586.20|CD99	561.893	574.798	529.552	554.527	609.666	610.454	566.62	589.091	318.374	340.309	327.258	354.116	324.803	338.441	338.118	325.488
ENSG00000002587.10|HS3ST1	0.913377	1.5309	1.09706	1.18993	1.06211	1.45972	1.32046	1.24863	1.11099	0.856899	1.11462	0.972348	0.81072	0.920215	0.690591	0.595458
ENSG00000002726.21|AOC1	0	0	0	0	0	0	0	0	0	0	0	0	0	0	0	0
ENSG00000002745.13|WNT16	0	0	0	0	0	0	0	0	0	0	0	0	0	0	0	0
ENSG00000002746.15|HECW1	0	0.012377	0.027574	0	0.150765	0	0	0	0	0.060164	0.032012	0	0	0	0	0
ENSG00000002822.16|MAD1L1	29.8153	28.0766	26.0721	27.6013	24.6668	23.9623	23.9317	25.3293	27.5328	28.9605	25.4256	24.8136	24.2541	25.053	24.9899	27.6231
ENSG00000002834.18|LASP1	230.132	214.88	208.7	197.317	239.859	221.196	234.279	221.242	269.853	239.349	272.14	243.301	264.361	279.88	239.613	262.711
ENSG00000002919.15|SNX11	22.1016	22.8094	21.7238	23.0964	20.1822	26.1643	23.0037	27.0275	18.7443	19.7673	21.4528	18.7418	20.2812	22.1581	18.1444	19.1155
ENSG00000002933.9|TMEM176A	0	0	0	0	0	0	0	0	0	0	0	0	0	0	0	0
ENSG00000003056.8|M6PR	131.685	121.064	126.894	123.964	128.666	129.697	137.829	140.79	116.95	107.183	117.528	111.404	113.89	121.065	118.086	123.018
ENSG00000003096.14|KLHL13	3.43314	3.76669	2.62654	3.71522	3.06248	3.21466	2.2922	4.21021	13.28	12.4905	13.6677	11.7469	20.8404	20.3465	16.5857	21.6217
ENSG00000003137.9|CYP26B1	0.685788	0.100228	0.352259	0.744789	0.363842	0.631327	0.290952	0.182344	0.034146	0.078579	0.041242	0	0.067106	0	0	0.157541
ENSG00000003147.19|ICA1	43.1626	38.0431	47.6291	62.8402	51.9011	49.6678	58.2327	50.7212	22.1674	27.304	20.652	22.5627	19.3143	22.4028	24.9528	27.2993
ENSG00000003249.15|DBNDD1	70.8749	59.5615	67.6513	57.1818	62.3188	68.5048	63.0072	64.5748	56.4696	57.0659	56.6308	56.201	61.3806	65.0119	55.0002	61.7311
ENSG00000003393.16|ALS2	29.7984	24.9847	28.3511	33.3219	31.0111	32.7309	31.7926	29.6772	24.6392	27.8578	19.0892	21.5109	22.7104	26.9961	24.7553	30.0537
ENSG00000003400.15|CASP10	22.8082	21.2361	22.2174	26.7478	24.6169	23.0633	22.3513	24.6549	15.1853	19.1463	14.6473	17.2958	14.2201	16.239	13.1509	15.8184
ENSG00000003402.20|CFLAR	255.892	264.221	264.512	318.73	283.713	291.331	303.218	262.792	154.584	211.981	155.305	164.303	192.988	191.382	230.242	228.763
ENSG00000003436.16|TFPI	181.012	173.98	178.506	202.417	191.938	192.095	198.717	195.332	97.6459	110.093	102.223	108.992	118.52	118.476	104.214	129.428
ENSG00000003509.16|NDUFAF7	18.0753	14.725	16.2017	21.536	15.5455	20.2958	22.9287	21.5988	12.3144	17.7153	9.33338	10.7366	10.5696	12.4555	11.9611	12.0644
ENSG00000003756.17|RBM5	129.41	112.394	141.259	147.441	144.657	155.983	175.328	123.61	49.9167	74.5554	41.7779	55.2781	56.532	59.7755	62.565	73.6681
ENSG00000003987.14|MTMR7	0.185629	0.703239	0	0.287658	0	0.411535	0.673064	0.230596	0.70528	0.599428	0.487399	0.361387	0.539028	0.465507	0.666139	1.35228
ENSG00000003989.18|SLC7A2	21.4658	18.5164	20.3984	22.8512	37.1975	21.6518	24.6358	23.6888	112.148	100.995	109.032	92.0273	171.564	170.91	133.871	178.619
ENSG00000004059.11|ARF5	89.4316	87.6108	98.8007	101.802	105.491	95.5401	101.994	93.2485	116.252	118.381	108.873	111.35	101.177	122.739	107.86	102.229
ENSG00000004139.14|SARM1	3.44153	3.63461	3.56489	3.6524	2.06265	3.24577	4.74504	3.76773	4.47739	5.78216	4.58889	4.84368	5.21689	5.14143	4.73757	5.08188
ENSG00000004142.12|POLDIP2	57.915	57.5937	60.195	61.5016	62.0572	58.5603	67.7342	57.713	91.8731	89.0894	92.1901	91.8706	81.3584	78.7703	72.8117	85.4128
ENSG00000004399.13|PLXND1	396.769	353.909	412.086	413.768	470.113	455.746	476.554	467.278	273.881	302.229	232.042	269.957	329.003	377.253	361.587	394.826
ENSG00000004455.17|AK2	45.2076	46.2588	40.3895	50.1539	55.0045	47.7986	51.0406	51.4576	66.8252	72.4396	74.4474	70.5636	71.1497	87.3229	87.8569	90.1377
ENSG00000004468.13|CD38	0.3428	0	0	0.045773	0	0.141787	0	0.13198	0	0	0.055784	0	0.149231	0	0.03057	0
ENSG00000004478.8|FKBP4	62.4388	56.5752	57.7644	58.2643	49.9082	56.467	63.9204	59.083	82.3994	75.5745	79.2111	73.4094	75.6482	69.0743	67.5333	66.4344
ENSG00000004487.17|KDM1A	51.8052	45.204	50.2031	49.8155	59.0299	53.5562	59.6004	52.5194	48.9958	53.2566	48.2896	49.884	48.7351	53.842	48.9491	54.2793
ENSG00000004534.15|RBM6	61.4773	52.2921	67.6452	79.4702	67.8872	77.731	79.811	70.5874	33.2696	48.7231	26.3853	33.2783	30.5308	32.6923	40.8873	48.4504
ENSG00000004660.15|CAMKK1	6.7265	6.85365	7.11332	9.6356	7.06405	7.35847	9.21048	8.28128	4.33911	6.42513	4.06073	4.65233	3.43779	4.26628	5.27658	5.49615
ENSG00000004700.16|RECQL	38.711	39.6909	38.2893	44.2067	43.9727	48.9029	53.1507	44.6158	32.9899	36.9059	39.2057	36.843	37.7333	39.5336	36.3275	37.505
ENSG00000004766.17|VPS50	14.494	14.3936	13.7597	15.812	19.4059	16.6978	17.5413	16.9296	10.6695	14.7539	12.0573	12.4899	10.6053	10.6084	10.0682	12.5096
ENSG00000004776.13|HSPB6	1.43585	3.11794	1.58885	2.22916	0.712605	1.75968	1.25218	2.26988	4.23281	3.88003	3.89578	5.12812	2.25063	3.79279	2.60194	2.82373
ENSG00000004777.18|ARHGAP33	3.42714	3.59877	3.18907	3.5182	2.32028	3.71804	2.96864	5.13085	2.01986	3.61696	2.21661	2.39792	1.87657	2.56365	3.32343	3.26793
ENSG00000004779.10|NDUFAB1	90.153	109.316	100.72	107.814	97.9072	116.477	106.085	107.665	130.894	148.429	124.251	150.978	129.314	134.468	134.735	123.105
ENSG00000004799.8|PDK4	11.6938	9.2864	10.8172	12.2677	10.1972	12.3605	11.3497	10.745	1.52371	0.405115	1.12156	0.937167	1.07566	1.42692	0.625825	0.729225
ENSG00000004809.14|SLC22A16	0	0	0	0.04097	0	0	0.041204	0.206335	0	0	0	0	0	0	0	0
ENSG00000004838.14|ZMYND10	0.294314	0.469407	0	0.216072	1.5172	0.071636	0.091004	0.393431	0	0.279399	0	0.129548	0.218916	0	0	0
ENSG00000004846.17|ABCB5	0	0	0	0	0	0	0	0	0	0	0	0	0	0	0	0
ENSG00000004848.8|ARX	0	0	0	0.249066	0	0	0	0	0	0	0	0	0	0	0	0
ENSG00000004864.14|SLC25A13	17.5533	14.8797	16.736	18.7495	20.037	19.2559	17.9111	18.4987	24.5713	26.8241	23.4175	21.7066	26.0135	24.1194	25.0524	24.3686
ENSG00000004866.22|ST7	16.7116	24.1339	19.0171	22.8721	22.5156	16.8156	17.8954	22.3821	18.3678	22.3835	16.2949	14.8277	18.5395	20.1596	14.8649	21.1312
ENSG00000004897.12|CDC27	44.1023	42.8603	40.0363	49.8329	48.471	47.0157	47.8609	43.4807	41.5542	39.9149	43.8747	37.1281	47.0154	45.561	39.6336	50.307
ENSG00000004939.16|SLC4A1	0	0	0	0	0.063329	0	0	0	0	0	0	0	0	0	0	0
ENSG00000004948.16|CALCR	0	0	0	0	0	0	0	0	0	0.110854	0	0	0	0	0	0
ENSG00000004961.15|HCCS	33.591	30.3247	32.9839	35.4158	25.2506	35.2975	29.5438	36.1301	36.3554	29.0707	35.6707	35.1459	34.5129	36.005	34.3471	34.4261
ENSG00000004975.12|DVL2	40.6394	39.0743	48.4454	46.4681	50.7041	49.1101	50.4252	53.4663	36.592	41.3927	27.7972	30.957	33.841	36.3672	37.0472	36.541
ENSG00000005001.10|PRSS22	0	0	0	0	0	0	0	0	0	0	0	0	0	0	0	0
ENSG00000005007.13|UPF1	67.0758	55.8274	66.2943	60.5689	63.4013	62.6171	67.2596	68.6657	52.0684	53.1718	44.5157	49.1965	46.8323	51.435	45.9655	50.0105
ENSG00000005020.13|SKAP2	24.1144	22.7591	19.2752	23.551	23.217	26.1896	26.203	25.2061	20.8622	21.4388	21.8011	19.8229	24.3077	22.7623	20.8311	20.5944
ENSG00000005022.6|SLC25A5	212.12	221.264	226.355	235.067	211.576	205.423	239.442	234.714	308.345	302.972	330.846	324.36	315.817	289.462	289.601	295.671
ENSG00000005059.16|MCUB	16.7603	18.239	21.3821	18.8208	19.3424	20.6427	15.5713	19.1467	30.4638	31.8329	34.5735	36.9547	35.7623	35.0427	31.7812	29.3894
ENSG00000005073.6|HOXA11	0.105226	0	0	0	0	0	0	0.093966	0	0	0.039284	0.110383	0.047572	0.238653	0	0.150777
ENSG00000005075.15|POLR2J	66.2124	59.7662	67.6647	57.7275	60.2646	70.7694	65.3705	61.809	85.3163	81.2894	83.8896	94.0404	77.2911	72.4709	80.4785	73.9602
ENSG00000005100.13|DHX33	13.345	13.1984	16.6194	16.2849	16.277	16.1238	17.5714	15.636	18.9853	19.2641	14.1875	15.895	18.0263	16.8273	15.1287	16.3342
ENSG00000005102.14|MEOX1	0	0	0	0	0	0	0	0	0	0.240109	0	0	0	0	0	0
ENSG00000005108.16|THSD7A	10.565	9.61676	11.426	12.1059	11.6923	11.6386	11.5586	11.7214	3.38974	2.635	3.56598	3.14411	3.81362	3.27629	3.20804	3.6993
ENSG00000005156.12|LIG3	8.42835	5.76742	7.60735	8.90666	8.01229	7.69448	7.30642	7.58534	11.3004	9.08174	8.17494	8.07652	8.66135	9.33134	8.11159	9.69795
ENSG00000005175.10|RPAP3	12.7041	10.7524	12.7159	13.2015	8.0806	13.3141	16.57	12.5521	9.95014	14.1019	12.9328	14.2799	15.6258	13.6844	9.95419	14.934
ENSG00000005187.12|ACSM3	24.7612	22.828	15.8703	23.9039	27.4302	24.3286	26.3062	24.2172	0.297417	0.741439	0.379614	0.345327	0.307451	0.133569	0	0.109146
ENSG00000005189.20|REXO5	1.65652	1.50924	2.49742	1.71568	2.13911	2.02406	2.55795	1.30902	5.24376	5.08064	3.23181	3.15731	2.70132	2.44499	2.77888	2.6428
ENSG00000005194.15|CIAPIN1	50.5078	41.4805	44.0421	48.0247	49.1985	51.2074	54.1645	48.7443	69.792	72.8104	65.9351	69.0137	62.7224	61.2771	59.0789	64.7537
ENSG00000005206.17|SPPL2B	74.1815	57.2136	54.8285	67.1567	60.1448	72.7406	85.547	79.5348	28.3597	41.1503	23.8133	29.3782	23.8503	31.6182	40.4342	35.9988
ENSG00000005238.20|FAM214B	44.5283	44.4274	47.5931	44.5036	54.0716	54.4435	59.8383	53.0453	38.1933	39.7271	39.0769	36.715	52.581	55.0923	52.8465	55.4355
ENSG00000005243.10|COPZ2	23.4935	27.8123	23.3096	26.0878	13.4654	24.8405	17.613	22.5205	38.8479	37.8857	38.9043	42.2886	43.5063	43.6051	41.8831	36.778
ENSG00000005249.13|PRKAR2B	23.5809	20.0873	23.0508	23.6111	21.8723	23.5669	23.7231	25.2853	34.8704	33.0246	40.1109	34.1869	30.3192	28.3832	26.8912	29.5751
ENSG00000005302.19|MSL3	41.6072	32.3395	41.0984	40.3846	39.676	39.4989	45.6351	41.3638	34.7312	36.2394	32.7086	32.882	35.3744	38.3696	35.1017	39.0721
ENSG00000005339.15|CREBBP	32.4734	27.172	28.7397	28.7916	26.5123	26.1165	27.7312	29.5481	25.5091	25.865	19.0252	19.1675	25.9448	26.4168	22.7456	25.4671
ENSG00000005379.17|TSPOAP1	0	0	0	0	0.186282	0	0	0	0	0.20814	0	0	0	0	0	0
ENSG00000005381.8|MPO	0	0	0.17417	0	0	0	0.078828	0	0	0.269302	0.064882	0.067652	0.155586	0	0.086908	0.062566
ENSG00000005421.9|PON1	0	0	0	0	0	0.096363	0	0	0	0	0	0	0	0	0	0
ENSG00000005436.14|GCFC2	10.5674	8.78506	10.4005	11.1434	10.6416	9.75519	12.6501	11.3902	13.4784	13.1137	14.6213	10.2882	8.11233	8.63868	9.52686	8.85585
ENSG00000005448.17|WDR54	29.729	22.448	21.4796	23.1765	28.9681	24.3176	27.8688	23.6521	24.1248	21.5553	26.0605	22.9749	19.4044	20.0141	21.2927	15.2806
ENSG00000005469.12|CROT	10.9076	11.516	10.402	12.7949	11.6919	12.0885	13.6605	14.4984	7.48305	8.54486	7.20154	8.18456	7.39537	7.14261	8.27862	10.6419
ENSG00000005471.19|ABCB4	0.033377	0.575548	0.408005	0.583368	0.612498	0.29624	0.737075	0.831183	0	0	0	0.139968	0.203048	0	0.100254	0.084353
ENSG00000005483.21|KMT2E	27.9297	24.9504	27.2805	29.0618	30.8555	28.1051	30.1332	30.2423	21.1166	28.493	20.2059	17.8097	24.9452	25.5605	32.4646	36.3955
ENSG00000005486.17|RHBDD2	74.5446	73.8724	80.4853	65.7359	69.4836	73.2171	72.8746	74.3726	39.0106	41.4437	46.3907	36.9201	35.91	42.2807	40.8524	35.7254
ENSG00000005513.10|SOX8	0.673496	0.417109	0.22835	0.156919	0.723933	0.389014	0.891805	0.50168	0.171162	0.052136	0.073865	0.208377	0.328235	0.391506	0.327501	0.203992
ENSG00000005700.15|IBTK	17.7545	20.0323	17.6591	19.9086	19.9532	18.1333	24.5108	21.7627	17.8166	19.637	20.9129	21.0411	21.704	22.964	18.8206	26.9257
ENSG00000005801.18|ZNF195	25.9346	19.5292	17.6575	24.6098	17.9004	18.001	20.9125	22.5785	9.91166	12.4016	8.89951	7.35279	7.75509	9.38526	9.93061	13.4851
ENSG00000005810.19|MYCBP2	16.0201	16.0356	17.3316	18.6453	19.5354	16.8773	21.962	19.3197	17.8735	14.3134	19.6829	15.7447	24.125	22.8029	18.4794	26.2383
ENSG00000005812.11|FBXL3	27.6987	23.6836	22.1433	31.2423	34.5262	29.3288	29.6739	33.2098	17.0832	17.1167	20.7247	16.5548	20.9653	22.6132	19.5827	20.8101
ENSG00000005844.19|ITGAL	0.196673	0.114162	0.006081	0	0	0.015385	0.135194	0	0	0	0	0.01435	0	0	0	0
ENSG00000005882.12|PDK2	19.3782	15.404	15.1906	20.5498	17.3701	16.7509	16.4331	19.5883	12.1097	15.5639	12.2004	11.7756	15.1169	14.3046	10.9854	13.9293
ENSG00000005884.18|ITGA3	83.8744	73.485	83.6861	80.0804	84.784	83.1306	90.7271	90.8746	56.4197	58.4892	55.5728	56.6042	47.7682	55.7063	51.8138	52.7118
ENSG00000005889.16|ZFX	12.096	9.66676	10.4246	15.1469	14.2032	13.0801	11.1106	14.251	11.0537	15.0034	11.1545	10.597	12.101	12.8853	11.2329	16.3138
ENSG00000005893.16|LAMP2	135.578	135.946	138.32	149.803	164.484	153.325	148.458	157.103	131.726	133.271	138.312	132.633	159.967	156.622	149.848	167.974
ENSG00000005961.19|ITGA2B	0.720127	0.634402	1.05865	0.364672	0.469766	1.77153	0.685549	1.54602	0.237158	0	0.139051	0.168898	0.122936	0	0	0.318674
ENSG00000005981.13|ASB4	0	0	0	0	0	0	0	0	0	0	0	0	0	0	0	0
ENSG00000006007.12|GDE1	67.2531	67.121	70.7461	78.501	73.8106	70.8473	65.648	66.7571	47.6805	43.6344	45.6983	43.8811	43.7985	46.5453	40.384	48.5999
ENSG00000006015.18|REX1BD	55.7068	61.4601	52.3276	51.9848	55.9224	62.79	59.0512	55.1374	72.9193	65.5158	58.0171	69.7743	60.4389	58.7569	67.2811	57.6096
ENSG00000006016.12|CRLF1	0.667212	0	1.1874	0.285874	0.41829	0.483909	0.666957	2.36428	0.830628	0	0	0	0	0	0	0
ENSG00000006025.12|OSBPL7	18.6257	14.2965	21.5155	23.1886	23.881	18.8396	20.0506	23.1818	7.86884	11.2857	6.23646	7.65712	8.11866	7.96783	10.1863	10.9916
ENSG00000006042.12|TMEM98	60.6446	54.9986	49.3054	45.098	42.7463	45.6968	48.3897	43.2638	39.3312	42.7371	33.8898	38.0802	46.7004	50.4493	45.4672	47.8537
ENSG00000006047.13|YBX2	0	0.075843	0	0.044414	0.095988	0.257285	0	0.162634	0	0.348944	0.043549	0.047666	0	0.148417	0.037358	0
ENSG00000006059.4|KRT33A	0	0	0	0	0	0	0	0	0	0	0	0	0	0	0	0
ENSG00000006062.18|MAP3K14	5.28324	5.68415	4.57506	6.3852	5.14582	4.80573	5.55422	4.97774	2.55216	4.08146	1.67498	3.2428	3.25857	3.09539	2.82096	2.32387
ENSG00000006071.16|ABCC8	0	0.068018	0.223064	0.089623	0.016781	0.246361	0	0.171841	0	0.232678	0	0.08863	0	0	0	0
ENSG00000006116.4|CACNG3	0	0	0	0	0.19753	0.132584	0	0	0	0	0	0	0	0	0	0
ENSG00000006118.15|TMEM132A	191.168	161.706	186.813	169.207	221.227	226.086	207.58	202.778	82.5979	99.078	82.5633	93.7108	98.6883	110.89	117.647	115.434
ENSG00000006125.18|AP2B1	161.106	156.79	165.66	178.989	170.338	165.156	146.973	195.928	211.187	163.836	230.168	138.178	216.15	229.231	147.751	222.318
ENSG00000006128.12|TAC1	0	0	0	0.120625	0	0	0	0.400657	0	0	0	0	0	0	0	0
ENSG00000006194.10|ZNF263	26.2675	26.3995	24.6469	31.8097	29.8367	30.7771	30.1062	28.7165	19.8388	16.3265	16.0446	19.6566	17.9311	19.5288	18.1843	22.1377
ENSG00000006210.7|CX3CL1	8.36977	8.59874	4.76993	5.73447	7.30498	10.4415	11.1259	9.67178	6.50638	6.33189	7.97495	9.66227	10.7687	12.7906	8.09618	9.49272
ENSG00000006282.21|SPATA20	63.4071	57.121	66.0877	76.7958	68.971	77.1988	83.1902	74.2476	36.7571	45.0202	36.7942	37.8261	34.394	42.7737	36.7859	45.6295
ENSG00000006283.18|CACNA1G	0	0.091663	0.065116	0.488232	0.031976	0.121772	0	0	0	0.024797	0	0	0	0.019375	0.014507	0.06901
ENSG00000006327.14|TNFRSF12A	130.858	124.333	117.304	109.579	141.564	142.475	170.668	143.364	165.115	154.971	146.455	159.409	154.675	162.353	162.57	154.756
ENSG00000006377.11|DLX6	0	0	0	0	0	0	0.078633	0	0	0	0	0	0	0	0	0
ENSG00000006432.16|MAP3K9	0	0	0	0	0.05096	0.054763	0	0	0.013448	0	0	0	0	0	0.02985	0
ENSG00000006451.8|RALA	289.805	292.728	283.937	305.276	324.493	329.214	324.948	325.432	607.23	601.87	650.501	675.361	609.16	618.682	648.345	621.222
ENSG00000006453.14|BAIAP2L1	0.446773	0.574329	1.38696	0.735392	1.88276	0.256179	0.48084	0.627975	1.27479	0.994535	0.926904	0.802582	1.12137	0.959499	1.2669	0.698888
ENSG00000006459.11|KDM7A	8.24323	7.26705	9.05805	9.54883	9.33906	8.40494	8.29439	9.28652	3.54266	4.00934	3.50073	2.56245	6.04752	6.34148	5.98612	8.01452
ENSG00000006468.14|ETV1	2.2235	3.56935	4.38292	2.80605	2.73479	3.56397	3.5442	3.44723	2.91901	2.20791	2.26895	1.99694	2.39514	2.57649	2.30872	3.11803
ENSG00000006530.18|AGK	11.7927	12.6807	14.0442	16.1877	13.7486	13.5435	17.8361	17.1713	17.6642	17.461	14.5787	15.8864	15.606	18.0056	15.2671	20.0847
ENSG00000006534.16|ALDH3B1	1.4509	0.89134	1.62014	0.995092	0.947842	2.8884	0.960613	0.743775	1.11402	2.6808	1.00212	1.95173	1.30028	1.15406	1.64749	1.85354
ENSG00000006555.11|TTC22	0	0	0.205869	0	0	0	0	0	0	0	0	0	0	0	0	0
ENSG00000006576.16|PHTF2	8.60404	8.77063	9.51823	9.18256	12.1604	9.0982	10.1419	9.8612	10.6777	12.0774	11.1394	10.8148	13.081	13.3081	10.6011	13.005
ENSG00000006606.9|CCL26	0	0	0	0.801583	1.25787	0.407181	0.377658	0	0	0	0	0	0	0	0	0
ENSG00000006607.14|FARP2	20.7013	18.8501	18.2867	23.7785	23.5145	21.0857	20.8778	22.0001	17.393	18.9588	18.0724	17.47	21.9576	21.0802	24.5688	28.8265
ENSG00000006611.17|USH1C	0.071623	0	0	0.09647	0	0	0	0	0	0.148227	0	0	0	0.003055	0	0
ENSG00000006625.18|GGCT	34.6078	32.9854	31.6394	27.7243	38.6954	30.0515	31.1895	31.468	48.917	50.1185	43.5774	51.5268	37.4099	34.5754	34.8805	30.0032
ENSG00000006634.8|DBF4	3.19319	3.30364	4.797	3.7623	2.36631	3.5526	7.09166	4.53854	4.97102	4.48908	8.11745	5.38721	4.35616	6.19261	4.86407	4.63512
ENSG00000006638.13|TBXA2R	5.22967	6.42049	6.3564	4.72237	6.55876	6.5653	6.71347	3.05416	3.85768	5.604	4.25462	4.35748	4.42761	5.54933	5.17011	5.70168
ENSG00000006652.15|IFRD1	74.3319	62.4725	61.9613	75.3347	68.5287	97.5926	78.0885	74.7615	16.6687	21.104	15.8305	24.8801	23.683	26.1498	28.7622	26.2435
ENSG00000006659.13|LGALS14	0	0	0	0	0	0	0	0	0	0	0	0	0	0	0	0
ENSG00000006695.12|COX10	2.44896	4.87497	7.02675	2.58826	3.79658	3.17526	6.1889	6.34214	9.01266	6.43044	6.5917	7.5567	6.4527	8.96245	5.29907	6.54223
ENSG00000006704.11|GTF2IRD1	19.3459	18.5605	17.1716	20.9618	20.5546	18.2678	26.903	22.8193	9.73017	11.7711	9.6751	10.5245	9.29963	12.7831	10.6209	14.3871
ENSG00000006712.15|PAF1	53.2382	53.8716	51.4853	56.165	66.6805	59.5604	58.4967	56.4564	48.6269	42.1042	51.1207	47.9562	42.7048	46.3907	44.8778	48.4708
ENSG00000006715.16|VPS41	40	40.6922	39.6046	47.9466	44.1686	43.9069	43.1331	49.4772	37.2608	39.8221	38.1718	37.7128	44.9219	47.0254	44.5762	51.6809
ENSG00000006740.17|ARHGAP44	0	0.28226	0	0.463106	0	0.775178	0	0.328126	0.174789	0.454629	0.288396	0.213564	0.469432	0.374625	0.262935	0.504711
ENSG00000006744.19|ELAC2	50.3341	48.4293	61.0966	55.5156	54.4352	57.6344	62.9079	55.0119	63.5251	56.0846	52.9829	54.7267	57.0443	54.6481	48.7824	51.0807
ENSG00000006747.15|SCIN	0.251905	0	0.014391	0	0.341088	0.108513	0.025923	0.047856	0	0	0.021444	0.044158	0	0	0	0
ENSG00000006756.16|ARSD	15.1787	14.4466	13.7352	15.5147	14.1834	14.3686	13.0898	16.4704	9.05892	9.40169	9.88664	9.14243	9.43875	11.9512	10.6625	11.8787
ENSG00000006757.12|PNPLA4	4.89063	5.84477	4.30188	3.98738	5.78587	5.69649	4.3872	4.63373	7.34959	5.64926	6.29318	6.13363	6.06077	6.46661	5.23015	6.82548
ENSG00000006788.14|MYH13	0	0	0	0	0.06554	0	0	0	0	0	0	0	0	0	0	0
ENSG00000006831.10|ADIPOR2	35.5209	35.7449	35.4636	43.3552	40.3636	37.5788	38.0308	36.3457	55.9945	55.6307	49.7569	53.2777	58.4829	55.0494	57.2975	64.3237
ENSG00000006837.12|CDKL3	2.43855	1.98608	3.14129	0.862987	0.613186	1.77632	4.45125	1.00049	0.953308	2.3747	1.92701	1.38384	0.469472	0.829681	3.81831	1.86716
ENSG00000007001.13|UPP2	0	0	0	0	0	0	0.014503	0	0	0.044995	0	0	0	0	0	0
ENSG00000007038.11|PRSS21	0	0	0	0	0	0	0	0	0	0.389596	0.902289	0	0.228094	0.363167	0.159387	0.556039
ENSG00000007047.15|MARK4	43.9058	38.274	40.8326	43.8993	38.0438	36.338	40.0064	41.4208	23.401	26.5493	20.2689	20.5362	29.8298	27.4105	29.3477	28.4061
ENSG00000007062.12|PROM1	0	0	0.390551	0	0	0	0	0.029218	0	0	0.04774	0	0.038608	0	0	0
ENSG00000007080.11|CCDC124	145.123	150.74	146.485	133.941	143.963	157.703	144.256	140.088	211.006	145.791	218.264	188.365	179.538	178.193	209.212	177.066
ENSG00000007129.18|CEACAM21	4.45987	3.80579	1.79479	1.79892	2.3915	1.64894	2.02917	1.00776	0	0.12863	0.566557	0.196218	0.485592	0	0.145572	0.799066
ENSG00000007168.14|PAFAH1B1	91.3558	85.3153	91.5439	101.013	97.949	92.0426	99.3277	94.082	77.1604	92.9581	71.7943	79.3846	84.2598	104.485	99.9778	108.603
ENSG00000007171.18|NOS2	0.062004	0	0	0	0	0	0	0	0	0	0	0	0	0	0	0
ENSG00000007174.18|DNAH9	0	0	0	0	0	0	0.015454	0	0	0.109022	0	0	0	0.020159	0	0
ENSG00000007202.15|KIAA0100	96.1104	92.0938	115.052	102.813	112.493	103.44	109.12	102.511	79.9713	73.7727	78.7118	68.9668	87.0015	88.2533	75.8739	97.0999
ENSG00000007216.15|SLC13A2	0.042661	0	0	0	0	0.010136	0.147551	0.044142	0	0.095363	0	0	0	0	0	0.069775
ENSG00000007237.19|GAS7	0	0	0	0	0.048176	0	0	0	0	0	0	0	0	0	0	0
ENSG00000007255.10|TRAPPC6A	16.1854	24.7951	14.9925	23.7539	19.0516	18.4645	24.5746	22.9495	15.0767	17.5078	13.9816	15.5919	14.42	18.4807	16.9802	15.6883
ENSG00000007264.15|MATK	0	0	0.529669	0	0	0.360738	0	0.120138	0	0	0.099457	0	0	0.053485	0	0
ENSG00000007306.15|CEACAM7	0	0	0	0	0	0	0	0	0	0	0	0	0.067793	0	0	0
ENSG00000007312.13|CD79B	1.33286	3.97255	2.88945	0.772983	0	2.02279	2.1398	1.72264	2.98781	3.0526	5.04526	3.52755	2.38557	3.59628	2.91925	2.20567
ENSG00000007314.12|SCN4A	0.049477	0	0	0	0.037392	0.016282	0.048964	0	0	0	0.013367	0	0	0	0	0
ENSG00000007341.19|ST7L	17.2352	12.9088	18.6683	16.8964	17.1706	14.5554	13.4196	11.5714	12.5425	16.6224	10.8807	14.9618	10.8436	14.3958	15.3892	18.6197
ENSG00000007350.17|TKTL1	0	0	0	0	0	0.335644	0	0	0	0	0	0	0	0	0	0
ENSG00000007372.24|PAX6	0.388777	0	0.633382	0.012356	0	0.028935	0.796587	0.001356	0.007105	0	0	0	0	0	0	0
ENSG00000007376.8|RPUSD1	35.1313	39.8574	42.2126	31.128	35.7014	35.7836	37.4999	40.192	49.0375	45.203	48.0953	47.9919	35.8956	42.0093	39.7348	40.4587
ENSG00000007384.15|RHBDF1	98.1857	108.041	119.552	109.433	117.303	130.721	144.705	133.536	33.5033	42.2796	31.2608	34.4725	32.7852	32.8769	35.3375	42.8175
ENSG00000007392.17|LUC7L	78.9627	62.4504	88.9631	86.1376	86.8752	88.6554	90.6695	88.9825	31.7711	50.3007	32.6481	35.1486	27.4246	38.939	41.8352	37.1166
ENSG00000007402.12|CACNA2D2	0	0.090625	0	0	0.03233	0	0.21489	0.115579	0	0.145493	0.084066	0.036672	0.024051	0.02897	0.033163	0.094025
ENSG00000007516.14|BAIAP3	1.69356	0.690835	0	0.764913	1.50907	0.332014	0.628915	0.342399	0.121551	0.072305	0.127877	0.133686	0.165017	0	0.27549	0
ENSG00000007520.4|TSR3	97.7951	96.2447	84.5914	89.0571	91.5927	93.2268	82.5249	94.2499	134.634	119.672	147.783	130.373	103.171	116.321	104.63	105.342
ENSG00000007541.17|PIGQ	74.1281	57.2906	62.5472	63.2705	55.7613	73.3615	66.1426	73.2888	30.46	41.03	26.022	29.0736	27.6653	30.4815	30.7417	30.3708
ENSG00000007545.16|CRAMP1	20.3931	20.3101	22.7647	20.9823	18.217	21.9729	22.4181	21.9396	10.2541	13.8353	7.73973	8.32543	9.69581	12.1109	11.5881	12.6158
ENSG00000007866.22|TEAD3	1.56638	1.24978	1.30242	1.59698	2.74819	1.75104	2.40867	2.4775	0.660006	0.654395	0.485332	0.583359	0.633076	2.30283	1.5715	0.912211
ENSG00000007908.16|SELE	112.48	107.349	73.1346	78.1617	126.757	120.735	131.109	129.613	37.5214	34.6696	37.1416	38.471	69.6073	71.5291	62.4385	80.3783
ENSG00000007923.16|DNAJC11	43.5834	35.7487	45.3204	43.2416	43.3005	42.4136	46.5654	46.9551	59.1395	62.1671	56.1532	55.7305	53.8503	62.4708	52.268	58.9773
ENSG00000007933.13|FMO3	0.116915	0	0	0	0	0	0	0	0	0	0	0	0	0.00561	0	0
ENSG00000007944.15|MYLIP	9.64069	12.8565	11.7951	15.2873	12.5536	11.1113	13.9471	12.9449	4.41199	5.90681	4.50777	4.00706	4.10027	4.618	4.95617	3.87126
ENSG00000007952.18|NOX1	0	0	0	0	0.048201	0.049726	0	0	0.061175	0	0.040618	0	0	0	0.04235	0
ENSG00000007968.7|E2F2	0	0	0	0.144093	0	0	0.061776	0.048749	1.88055	1.71774	1.79941	1.30033	0.740745	0.958644	0.22931	0.458142
ENSG00000008018.9|PSMB1	182.72	202.753	208.51	191.554	205.024	201.625	205.623	189.369	257.229	257.507	239.871	271.584	241.876	229.372	260.609	244.206
ENSG00000008056.14|SYN1	0	0	0	0	0	0	0.296959	0.060201	0.351909	0.246554	0.303525	0.369538	0.24068	0.391172	0.534129	0.175965
ENSG00000008083.14|JARID2	6.32426	5.04411	7.26551	6.27532	5.55317	5.61781	5.89256	5.7101	4.34292	4.56729	4.25446	4.89425	5.64641	6.56135	5.92505	7.53396
ENSG00000008086.13|CDKL5	1.75646	1.56376	2.28292	1.76838	1.92629	2.63406	1.75855	2.82722	1.22565	1.29699	1.30737	1.01837	1.98421	2.49239	1.86708	2.16545
ENSG00000008118.10|CAMK1G	0	0	0	0	0.143134	0	0	0	0	0	0	0	0	0	0	0
ENSG00000008128.23|CDK11A	43.6811	41.4593	41.5676	41.5977	57.4482	54.5344	68.5539	48.3277	26.8161	32.1649	20.8066	24.5256	22.1391	22.7656	28.4013	25.5798
ENSG00000008130.15|NADK	74.0314	70.5685	88.3529	83.2553	74.9911	88.7964	83.9821	91.5945	56.7661	67.247	52.8001	56.0233	53.8805	59.1563	60.568	71.8488
ENSG00000008196.13|TFAP2B	0	0	0	0	0	0	0.045021	0	0	0	0	0	0	0	0	0
ENSG00000008197.5|TFAP2D	0	0	0	0	0	0	0	0	0	0	0	0	0	0	0	0
ENSG00000008226.20|DLEC1	0	0.039507	0.004179	0	0.368496	0	0.257329	0	0.006085	0.011106	0.093733	0.104124	0.011589	0.14248	0.074516	0.032014
ENSG00000008256.16|CYTH3	12.7811	12.4593	13.485	15.2199	15.0743	14.4628	14.946	14.8332	8.90522	10.0681	8.36096	8.78784	9.93075	11.7053	10.6687	13.8289
ENSG00000008277.15|ADAM22	0.26072	0.31921	0.400787	0.20164	0.190305	0.328123	0.43775	0.212007	0.110726	0.102588	0.259746	0.099234	0.100244	0	0.178714	0.16235
ENSG00000008282.9|SYPL1	78.0097	78.9876	72.0477	86.2589	84.1803	83.1696	87.7834	86.6687	95.5225	89.1785	92.1505	88.4504	100.836	101.241	95.0135	97.9508
ENSG00000008283.16|CYB561	32.6589	35.1069	35.0926	32.7877	39.654	37.0881	33.2853	37.6055	34.6155	38.5495	31.5426	35.142	32.1581	36.1545	36.7987	39.4486
ENSG00000008294.21|SPAG9	79.7971	74.5276	86.0863	88.4375	91.8251	81.4055	92.5036	83.7125	54.274	61.5216	65.2341	64.5722	95.9535	94.0922	90.8177	107.633
ENSG00000008300.17|CELSR3	1.43662	0.997291	0.94239	1.46153	1.32134	1.57494	1.15531	1.60614	0.572583	0.369358	0.207993	0.285417	0.364208	0.347249	0.508751	0.707538
ENSG00000008311.16|AASS	8.97126	7.50159	10.4478	13.0996	11.0377	10.9907	14.2955	12.201	5.78719	5.62846	5.62536	5.61134	5.01725	5.22232	6.38312	7.01914
ENSG00000008323.16|PLEKHG6	0	0	0	0	0	0	0.039082	0	0	0.062017	0	0	0	0	0	0.16121
ENSG00000008324.12|SS18L2	6.05413	10.3398	4.50217	6.97801	6.22393	7.73454	9.68088	7.89991	7.06154	14.3576	7.33297	12.8134	8.14115	8.25027	8.6201	7.13613
ENSG00000008382.16|MPND	13.5398	12.6688	20.0221	12.4264	11.4783	11.4041	15.5082	13.5529	14.3405	13.3896	14.6924	14.6731	15.5716	14.0245	18.0988	12.3935
ENSG00000008394.13|MGST1	290.762	298.799	266.768	301.6	289.163	302.048	286.351	313.153	295.899	351.726	284.434	298.319	289.532	280.361	295.928	273.567
ENSG00000008405.12|CRY1	13.1659	13.7975	13.1361	14.1573	12.666	14.5757	16.8865	16.8589	9.49962	11.2131	9.49736	9.85728	11.2735	11.0009	10.3497	11.916
ENSG00000008438.5|PGLYRP1	0	0	0	0	0	0	0	0	0	0	0	0	0	0	0	0.197948
ENSG00000008441.18|NFIX	45.8517	48.5301	51.8205	35.1965	56.3729	38.9097	49.294	48.8892	43.1101	44.6002	45.0726	45.6607	45.3562	47.0809	49.7174	43.3893
ENSG00000008513.16|ST3GAL1	52.7699	56.118	60.0568	58.5779	65.321	61.6295	60.1339	62.4365	42.6693	38.5032	38.3588	39.0593	45.8344	47.8258	41.9971	50.8878
ENSG00000008516.18|MMP25	0.465701	0.159684	0	0.237617	0.48811	0.53719	0.225473	0.230141	0.065331	0.376502	0.367214	0.140857	0.225553	0.262523	0.121254	0.151535
ENSG00000008517.19|IL32	468.432	442.883	416.38	390.903	454.363	474.868	439.081	445.917	571.49	560.837	541.207	552.634	609.36	585.314	583.116	535.749
ENSG00000008710.20|PKD1	71.8243	56.0288	80.6345	70.0202	69.7804	67.6271	70.212	69.8065	18.0521	33.8987	11.9992	17.8872	19.348	23.5448	26.2587	28.8665
ENSG00000008735.14|MAPK8IP2	0.371549	0.470598	0.683743	0.327706	0.308866	0.506826	1.03268	0.288194	0.11471	0.098725	0.317716	0.078529	0.277713	0.459441	0.328847	0.141377
ENSG00000008838.20|MED24	52.2332	51.5018	61.6302	60.9702	61.3854	64.1233	69.9042	56.4673	50.2968	59.589	50.3139	50.3431	50.021	53.7195	48.0408	59.4155
ENSG00000008853.17|RHOBTB2	9.46019	8.4241	8.38809	7.26673	5.8763	8.55219	7.72503	8.38672	9.81598	10.0668	9.7503	9.17353	9.82419	9.65235	7.39414	8.9637
ENSG00000008869.12|HEATR5B	19.449	12.8283	13.4224	18.6419	19.3406	19.0154	17.8257	19.2721	11.4556	11.7557	10.1323	10.0778	13.9822	12.9592	11.7485	14.927
ENSG00000008952.17|SEC62	66.8226	64.9236	72.6093	73.1796	83.0046	64.9657	71.5825	71.2272	33.1148	36.437	36.9052	39.1982	36.2566	41.1744	40.788	41.1797
ENSG00000008988.11|RPS20	902.666	1044.88	1186.56	1169.21	795.224	998.443	1206.72	1009.18	1632.15	1134.81	1272.15	869.494	1439.57	1208.63	756.172	1448.62
ENSG00000009307.16|CSDE1	275.665	231.655	239.227	249.88	266.175	246.837	297.139	265.929	269.956	211.075	285.459	225.515	266.397	262.78	238.656	284.155
ENSG00000009335.18|UBE3C	48.8774	47.8065	44.7607	54.857	55.7951	51.3138	49.1593	54.9827	63.2454	64.7746	57.58	56.4435	64.0926	66.9715	60.469	73.5142
ENSG00000009413.16|REV3L	15.3304	15.2863	15.3163	20.485	17.6279	15.2406	16.4914	16.0335	8.25245	9.37928	7.32377	6.30698	6.98884	5.77499	8.69903	11.3535
ENSG00000009694.13|TENM1	0	0.00165	0.032589	0	0	0	0.018002	0	0	0	0	0	0.012831	0	0	0
ENSG00000009709.12|PAX7	0	0	0	0	0	0.040503	0	0	0	0	0	0	0	0	0	0
ENSG00000009724.17|MASP2	0	0	0	0	0	0.229233	0	0	0	0	0	0	0	0.071282	0	0
ENSG00000009765.15|IYD	0	0	0	0	0.341136	0	0	0	0.017864	0.099339	0	0	0	0	0.039951	0.046093
ENSG00000009780.16|FAM76A	7.57109	7.09927	6.09236	5.79428	6.37138	5.54159	5.84112	5.81443	4.22859	7.45873	4.04798	5.62918	5.34088	6.80342	6.87586	6.24051
ENSG00000009790.15|TRAF3IP3	0	0	0	0	0	0	0	0	0	0	0	0	0	0	0	0
ENSG00000009830.13|POMT2	15.7269	16.8609	19.0246	18.6033	16.7688	20.6706	17.6205	22.2886	13.5822	15.9184	11.8971	14.0989	12.6812	13.2064	14.674	17.9531
ENSG00000009844.16|VTA1	10.2814	13.1781	11.728	9.77986	11.9332	9.78149	10.0125	11.0378	11.6286	16.0181	14.6117	12.9933	11.4519	12.003	11.7945	18.8509
ENSG00000009950.16|MLXIPL	0	0	0.022809	0	0	0	0	0	0	0	0	0	0	0	0	0
ENSG00000009954.11|BAZ1B	53.9719	47.8358	54.3978	50.3861	60.057	51.7087	50.0688	54.6683	61.3135	56.3133	57.1916	53.1725	59.5101	64.4237	55.8152	63.0672
ENSG00000010017.13|RANBP9	23.609	19.89	24.385	26.186	28.4032	27.0705	29.7678	27.6562	22.3892	26.9302	20.6957	23.5039	26.6207	30.7967	26.3965	29.9705
ENSG00000010030.14|ETV7	3.4162	1.96787	3.39616	0.915994	1.83826	2.77409	2.79255	3.5034	4.93758	4.79581	5.77117	5.74132	5.94885	7.18843	3.50036	3.98974
ENSG00000010072.16|SPRTN	10.4855	9.65314	9.37421	11.6506	14.2566	10.9607	11.344	11.6328	9.18518	9.64382	9.05596	9.68205	9.81063	10.932	8.88328	10.7564
ENSG00000010165.20|EEF1AKNMT	21.2257	19.8568	20.4379	21.1634	24.3324	19.656	21.8044	20.1398	29.3768	28.2339	28.1261	28.3626	28.4118	25.0051	23.0303	25.0201
ENSG00000010219.13|DYRK4	36.9329	31.2193	30.7461	38.5472	36.9165	36.3343	35.9029	31.6981	41.1951	35.8156	35.8995	42.3095	36.2921	33.4395	45.7566	38.2195
ENSG00000010244.19|ZNF207	82.6362	70.6206	75.6906	67.0277	90.0606	100.341	70.5914	73.6104	77.4592	86.1472	81.7264	70.6785	88.5526	64.9913	78.5363	89.1307
ENSG00000010256.11|UQCRC1	146.645	138.905	137.131	132.438	127.454	132.918	130.96	135.624	154.569	139.638	165.798	151.904	134.707	141.016	146.184	138.213
ENSG00000010270.14|STARD3NL	65.2068	65.5692	59.3408	62.1992	69.0713	71.2903	65.6949	67.3366	60.9547	69.3545	67.8804	64.0048	61.5866	71.0474	66.0879	59.2018
ENSG00000010278.15|CD9	689.4	512.355	586.173	674.956	727.492	555.093	738.725	664.646	1129.44	1609.08	1352.37	1608.86	1623.85	1674.87	1806.1	1678.25
ENSG00000010282.15|HHATL	0	0	0	0.104562	0	0.118964	0	0	0	0	0	0	0	0	0	0
ENSG00000010292.13|NCAPD2	17.576	15.1022	17.1086	17.1061	19.9262	16.5273	17.6461	18.997	29.896	31.5067	30.6897	32.3301	30.9277	30.8436	23.2546	22.9372
ENSG00000010295.20|IFFO1	48.2912	44.4759	56.3758	48.498	51.9531	55.1794	61.6335	59.6258	23.5372	36.2418	21.8532	26.7008	21.2689	24.9201	29.456	29.0218
ENSG00000010310.9|GIPR	0.319078	0.310582	0.257508	0.247439	0.154751	0.802755	0.305309	0.158773	0.054751	0	0	0.031878	0.048343	0.194156	0.099936	0.419069
ENSG00000010318.21|PHF7	4.20986	3.45205	2.86921	4.18144	5.64948	4.11818	5.55537	5.76415	4.39565	4.64129	2.75383	4.50758	5.60522	3.04533	5.00014	3.5313
ENSG00000010319.7|SEMA3G	1.60868	1.13496	0.606731	0.956739	0.795362	1.77232	2.09598	2.3225	1.00027	1.17298	0.811693	1.18593	2.21524	2.20237	2.49812	2.17332
ENSG00000010322.16|NISCH	130.395	117.783	136.956	141.186	150.294	147.807	165.315	145.678	49.6281	66.2587	41.1155	48.1723	49.9533	57.717	63.7901	68.088
ENSG00000010327.10|STAB1	93.7382	77.7088	87.7164	104.599	101.968	112.278	135.4	120.173	60.3895	95.6481	50.8464	68.5576	68.2937	82.528	86.8985	92.735
ENSG00000010361.14|FUZ	14.8291	11.6142	15.4383	16.4623	16.2631	15.5865	16.8579	14.006	9.76657	15.1742	12.9645	10.9535	11.4721	9.29727	11.1176	11.1093
ENSG00000010379.16|SLC6A13	0.225283	0.280149	0.441025	0.307657	0	0.150988	0	0.263706	0.281195	0	0	0	0	0	0	0
ENSG00000010404.18|IDS	48.4639	45.9531	58.6028	58.5304	59.5978	63.0261	62.0595	55.2009	30.0286	28.2257	29.7133	25.9333	35.0527	36.0684	29.7312	37.9351
ENSG00000010438.17|PRSS3	48.9373	45.5397	47.1207	48.6925	49.6476	45.7727	42.1004	41.1126	25.5558	28.9874	27.8053	26.3245	21.0876	28.1936	26.8402	19.867
ENSG00000010539.12|ZNF200	9.65	10.2428	11.4615	11.7913	10.3432	10.8717	12.0087	10.3345	6.2649	6.81007	6.24493	7.47818	7.85152	5.92402	7.50632	8.06616
ENSG00000010610.10|CD4	0.083888	0.046977	0	0	0	0	0	0.181372	0	0	0	0	0	0	0	0
ENSG00000010626.15|LRRC23	7.96055	7.53762	11.9814	10.3132	11.8816	8.97908	10.5248	7.77013	12.1269	10.555	9.44647	10.8224	8.34408	11.2216	10.0569	11.1118
ENSG00000010671.16|BTK	0.20277	0	0	0	0	0	0	0	0.851304	1.08709	1.36965	1.67737	1.6359	1.29084	3.41396	1.17019
ENSG00000010704.19|HFE	3.87553	5.47249	4.64288	6.03649	5.36259	5.70399	6.27281	7.43222	4.76835	4.32557	7.10827	5.82096	5.74317	8.45358	5.20665	6.97428
ENSG00000010803.16|SCMH1	22.7239	23.9072	33.1528	25.8687	27.5172	28.3103	31.4657	31.6752	22.9015	26.4121	21.3152	24.1478	22.0838	23.2931	22.9091	23.8087
ENSG00000010810.17|FYN	129.655	106.593	109.557	107.508	103.121	108.057	107.336	114.325	61.3	69.7474	51.4586	58.4553	61.4797	72.1858	64.1438	72.4918
ENSG00000010818.10|HIVEP2	11.4275	11.2684	11.3774	11.3506	12.5512	11.28	14.2605	12.4852	3.66163	3.9021	3.07775	3.02551	5.77401	6.33662	5.76246	7.01316
ENSG00000010932.17|FMO1	0	0	0	0	0	0	0	0	0	0	0	0	0	0	0	0
ENSG00000011007.12|ELOA	55.7284	48.8182	59.207	56.6914	52.1029	54.3319	56.8463	59.9169	51.3016	42.8427	50.7893	41.4262	51.3658	48.3708	45.9768	50.9205
ENSG00000011009.11|LYPLA2	103.479	102.78	114.656	94.8764	107.396	114.111	117.955	111.929	96.2157	94.5797	99.1503	100.908	88.5562	92.4731	98.1414	92.1448
ENSG00000011021.23|CLCN6	25.0459	19.7829	28.0843	23.0017	26.3256	22.5727	23.8443	27.6881	9.69285	16.9267	8.11586	9.77198	8.75244	10.1904	12.5157	14.7229
ENSG00000011028.14|MRC2	56.7747	49.2722	62.2355	58.3513	70.5463	69.2856	61.736	60.054	30.2111	30.5617	26.8272	31.5835	38.4881	44.0528	38.5103	41.8067
ENSG00000011052.21|NME1-NME2	86.2788	98.2039	83.1338	80.7297	81.0398	44.4553	85.359	74.0482	47.8141	0	18.659	53.7429	12.0764	54.4964	27.4339	38.7525
ENSG00000011083.9|SLC6A7	0	0	0	0	0	0	0	0	0	0.118276	0	0	0	0	0	0.111014
ENSG00000011105.14|TSPAN9	73.3923	69.9128	78.0174	68.4898	86.1632	80.126	79.673	77.4963	44.8516	47.0574	46.4873	50.8598	53.9423	60.5316	55.4639	55.9664
ENSG00000011114.15|BTBD7	19.5119	16.6065	18.7947	22.2863	22.2592	19.2448	20.082	21.7373	21.454	24.672	20.9313	18.6893	25.7081	24.6161	23.1109	26.7608
ENSG00000011132.12|APBA3	33.8649	31.322	37.8626	30.978	33.7153	31.9043	35.8927	38.8765	18.2065	25.5997	17.083	19.5439	14.5073	22.2256	20.2521	18.4052
ENSG00000011143.19|MKS1	10.431	9.74982	10.9281	11.2448	12.7487	9.60223	13.232	9.56502	7.62028	11.9233	7.56776	9.5676	6.98954	9.08874	8.86064	7.13784
ENSG00000011198.10|ABHD5	12.8629	13.6863	20.0244	22.202	15.1976	15.1449	13.913	18.475	14.0374	17.0658	12.8041	16.2409	14.606	17.7565	12.1688	14.4279
ENSG00000011201.12|ANOS1	0	0	0	0	0	0.054126	0	0	2.29576	2.16267	1.99854	2.9991	3.14597	3.78666	3.31513	5.08138
ENSG00000011243.19|AKAP8L	81.6246	84.4826	88.4392	92.5442	85.3489	96.4032	94.1329	100.407	49.1447	59.4753	43.7596	49.0209	41.7771	46.9127	44.4107	46.3024
ENSG00000011258.16|MBTD1	8.61568	8.43318	7.29323	9.49456	9.0351	8.07253	7.37848	9.21257	3.42529	6.77337	3.3725	3.76881	5.41322	4.67886	6.14332	5.65944
ENSG00000011260.14|UTP18	39.2009	35.0132	42.573	43.6372	43.902	38.6453	42.591	50.5368	50.4063	53.5333	53.0775	48.6673	46.0372	44.2402	43.3585	43.411
ENSG00000011275.19|RNF216	29.7061	30.0493	34.1528	31.3082	35.1151	32.2786	35.8789	31.4328	24.2102	27.4595	23.4236	20.2618	23.1591	26.9862	22.2788	26.5604
ENSG00000011295.16|TTC19	31.1203	23.8464	31.1151	31.3435	29.5287	32.7091	33.1296	33.4838	27.0325	32.64	33.3963	32.4288	29.8537	31.5602	31.5049	32.6656
ENSG00000011304.22|PTBP1	194.538	183.017	185.116	186.823	205.77	208.63	206.948	212.367	259.435	259.917	261.272	250.432	266.517	287.189	251.457	275.634
ENSG00000011332.21|DPF1	0	1.2827	1.48267	0.984052	0.873297	0.668371	0.408389	0.851329	1.84416	1.45364	1.56425	2.28335	1.58345	1.18159	0.787617	0.774718
ENSG00000011347.10|SYT7	0.278752	0.121415	0.107005	0.091341	0.058126	0.06996	0.319484	0.234751	0	0	0.014502	0	0	0	0.04256	0
ENSG00000011376.12|LARS2	9.25592	7.37201	6.75095	8.72679	13.033	7.44065	8.09167	10.697	11.0464	11.2185	9.50289	10.859	9.48986	10.3886	8.96409	10.1517
ENSG00000011405.13|PIK3C2A	52.8987	52.3696	51.5864	63.1721	61.1883	62.9086	62.1587	62.5607	43.952	47.899	53.4152	44.6478	59.2359	56.3733	51.7432	67.2785
ENSG00000011422.12|PLAUR	68.1428	83.1288	89.0474	72.0215	78.8178	81.1676	79.2447	87.7308	54.5301	60.043	49.666	60.1852	51.0477	57.7374	53.431	55.052
ENSG00000011426.11|ANLN	1.4539	1.27794	1.08137	1.12282	1.2428	0.539605	0.751758	1.03547	21.7973	22.0002	25.1905	22.0262	18.5096	18.0698	7.3908	9.68887
ENSG00000011451.21|WIZ	32.3728	32.9151	37.1304	32.3558	39.06	39.548	34.7994	37.4158	36.3566	34.681	30.5146	33.7213	36.3395	35.7482	40.8698	39.6574
ENSG00000011454.18|RABGAP1	39.7805	33.1536	37.9054	41.7754	41.9824	37.8946	42.5171	39.7944	26.5709	23.9941	22.991	24.4809	27.9067	24.594	23.7387	29.6108
ENSG00000011465.18|DCN	0	0	0	0	0	0	0.037193	0.035422	0.949147	1.49101	1.29507	1.29492	0.678783	0.340754	0.320257	1.64934
ENSG00000011478.13|QPCTL	20.5491	17.2466	14.8495	17.2864	14.9355	17.743	18.0174	14.9789	11.3289	14.9595	13.8939	13.2351	13.8703	12.3565	13.4498	14.0496
ENSG00000011485.15|PPP5C	69.7496	62.2924	73.1633	60.0262	69.6914	76.7014	78.1744	74.583	79.9949	87.8613	86.5841	85.3222	77.0354	80.6132	73.8656	70.1865
ENSG00000011523.14|CEP68	12.6	11.9743	12.8143	15.4776	13.8223	11.788	14.6686	13.1084	9.4172	9.65691	9.6549	9.41491	9.30078	11.8442	10.2929	12.5704
ENSG00000011566.15|MAP4K3	22.5743	22.2804	19.7585	27.647	24.9148	23.9821	25.9474	27.9634	13.1524	13.9158	10.1251	11.9287	18.2195	14.8938	17.7322	20.3442
ENSG00000011590.14|ZBTB32	0	0	0	0	0	0	0.287478	0	0	0	0	0.157037	0	0	0	0
ENSG00000011600.12|TYROBP	0	0	0	0	0	0	0	0	0	0	0	0	0	0	0	0
ENSG00000011638.11|TMEM159	42.5638	44.3739	38.8218	50.0458	48.0228	44.7192	42.7371	44.4624	34.3504	34.3839	35.4365	36.852	37.6279	42.4113	40.677	37.9751
ENSG00000011677.13|GABRA3	0	0	0.599955	0	0	0	0	0	0	0	0	0	0	0	0	0
ENSG00000012048.23|BRCA1	1.62362	2.05623	2.80959	1.77396	2.51337	1.42076	1.09432	1.72882	7.86176	9.00706	7.25434	7.7313	5.80001	4.95527	3.73007	4.11077
ENSG00000012061.16|ERCC1	94.4749	88.6765	98.4841	78.0888	93.0427	80.2264	86.8303	76.4552	82.4445	79.8378	86.4273	77.0197	69.9534	78.7507	71.9757	75.7329
ENSG00000012124.17|CD22	0.789827	0.114241	0.121114	0.636746	0.034764	0.031321	0.098051	0.13914	0.567252	2.13189	0.811501	0.783763	1.63664	0.690071	1.06215	0.52893
ENSG00000012171.20|SEMA3B	0.726128	1.29265	1.14486	1.16555	0.151122	1.04833	1.39111	1.56646	0.164156	0.882401	0.421229	0.414568	0.120097	0.515613	0.8083	0.945456
ENSG00000012174.12|MBTPS2	11.6903	10.1853	12.1831	15.2687	13.5755	11.2332	11.8977	13.7811	16.9613	14.7466	16.6247	14.2304	16.1582	16.6927	13.5765	15.2139
ENSG00000012211.13|PRICKLE3	14.7978	11.7647	18.7739	13.472	17.31	16.1035	19.4011	15.3031	14.9693	14.7388	13.8295	13.1904	13.6258	15.4411	13.851	16.9198
ENSG00000012223.13|LTF	0	0	0	0	0	0	0	0	0	0	0	0	0	0	0	0
ENSG00000012232.9|EXTL3	33.6338	31.8172	35.4029	32.6437	34.3309	34.271	39.1738	37.7928	22.8497	21.1055	19.5913	19.2553	22.2627	21.9148	19.1063	21.4541
ENSG00000012504.15|NR1H4	0	0	0	0	0	0	0.08834	0	0	0	0	0	0	0	0	0
ENSG00000012660.14|ELOVL5	53.1423	50.1771	51.5612	73.9119	78.6484	67.6015	84.7106	70.6571	68.9268	92.4799	67.3969	86.0398	86.6818	98.9122	92.8599	92.1082
ENSG00000012779.11|ALOX5	0	0	0	0	0	0.040459	0	0	0	0	0.257809	0.633342	0	0	0	0
ENSG00000012817.16|KDM5D	18.4791	16.57	17.8965	17.3997	17.1492	17.9388	20.8195	19.4711	9.48945	13.6235	8.5167	9.06526	11.4341	12.5649	15.2639	15.5385
ENSG00000012822.16|CALCOCO1	71.7809	65.1379	71.1316	81.4489	83.0807	83.1471	84.9153	86.6833	23.992	28.3126	18.3161	25.9282	29.2609	27.8064	34.6327	29.036
ENSG00000012963.15|UBR7	13.4125	12.6669	10.4792	12.1647	12.9	13.8739	12.4894	12.6506	21.8443	20.6315	19.2937	19.1392	17.9676	18.1765	13.2239	16.2419
ENSG00000012983.12|MAP4K5	37.602	41.0055	49.6165	54.5018	49.3077	47.9428	51.3231	46.4184	28.5475	30.6104	27.278	30.0169	31.7959	33.0241	31.2817	38.7071
ENSG00000013016.16|EHD3	2.43965	1.86775	3.50839	3.47373	3.96754	2.40916	3.0998	2.35591	3.45995	2.90816	3.31077	2.67301	3.79753	3.86481	3.49581	4.62808
ENSG00000013275.8|PSMC4	112.349	100.722	92.1179	105.298	109.785	94.9381	122.246	108.395	144.037	119.167	136.131	136.928	116.131	120.836	112.907	118.139
ENSG00000013288.9|MAN2B2	35.7594	35.6396	36.4634	33.0339	51.6822	46.5201	42.8156	39.7951	26.7242	29.6771	26.3859	27.2815	33.2662	42.8961	30.2323	37.7084
ENSG00000013293.6|SLC7A14	0.699312	0.552743	1.99362	0.424521	1.15015	0.671257	0.996449	0.740887	1.91115	2.04451	2.62661	2.11259	2.38394	2.38237	1.76936	2.081
ENSG00000013297.12|CLDN11	260.578	261.462	281.662	289.384	309.316	316.655	311.87	339.426	82.9896	91.2492	72.8705	89.9881	85.5188	85.9696	76.8343	67.5746
ENSG00000013306.16|SLC25A39	98.3907	95.2892	107.138	116.288	98.1271	122.727	103.93	116.001	110.319	125.035	112.974	113.974	103.212	108.789	100.118	114.118
ENSG00000013364.19|MVP	386.09	364.681	414.142	373.176	379.699	379.369	377.566	373.036	341.522	305.785	350.49	336.685	308.335	337.394	342.723	327.458
ENSG00000013374.17|NUB1	54.9954	50.4545	52.128	55.2901	54.7832	55.7464	55.357	56.2702	55.9893	55.7064	58.0388	61.5507	68.4253	71.324	62.8428	62.9625
ENSG00000013375.16|PGM3	38.062	31.0662	28.9028	37.5001	30.9398	42.9786	34.666	38.8827	39.0777	35.2952	44.5817	40.2111	50.4747	49.7613	53.2357	58.7595
ENSG00000013392.8|RWDD2A	7.97736	8.15307	8.83412	8.56123	8.8234	8.36999	8.66496	8.87247	5.8834	7.86827	6.12538	7.00121	6.44931	7.33994	6.98119	7.17815
ENSG00000013441.16|CLK1	63.6756	55.0266	73.2832	89.1575	84.8893	87.8095	87.2944	90.0183	22.1737	37.4458	19.8807	29.0651	31.1813	31.1825	34.8323	40.6569
ENSG00000013503.10|POLR3B	5.75629	7.59854	7.53222	8.18784	6.99953	8.82524	7.7393	7.52092	8.43965	8.6545	8.15387	8.61757	7.48165	7.40939	8.29518	7.96549
ENSG00000013523.11|ANGEL1	15.8508	13.9942	17.1487	18.7016	17.9205	17.9273	19.1477	17.4848	11.6696	11.4749	9.06271	9.27568	10.9491	10.5906	11.707	13.286
ENSG00000013561.18|RNF14	38.7562	30.936	37.1575	36.6327	35.3247	34.5398	31.1866	33.3547	43.1265	40.218	38.2027	38.6208	40.7317	40.2566	42.797	40.5836
ENSG00000013563.14|DNASE1L1	37.8937	47.9869	39.2971	49.1665	56.8961	49.5819	58.781	50.0538	44.8434	39.9234	44.5852	47.6772	49.504	51.0812	46.4098	50.2184
ENSG00000013573.17|DDX11	12.0495	7.02679	15.9452	14.407	13.5801	10.6892	16.2061	16.2615	10.7793	17.1949	8.0174	12.299	9.33916	11.273	9.9695	8.38811
ENSG00000013583.10|HEBP1	116.311	110.239	114.599	121.101	109.414	120.406	122.088	107.948	123.254	111.992	114.654	118.557	107.86	113.53	104.404	104.421
ENSG00000013588.9|GPRC5A	18.8516	16.821	17.1402	16.2739	17.942	16.9656	17.7958	14.6633	8.39445	7.4021	8.09741	8.6153	11.121	12.0103	10.4024	11.9763
ENSG00000013619.15|MAMLD1	5.32463	3.49229	2.39547	3.99714	2.66401	4.46568	4.35032	3.8382	4.69582	4.70027	3.07587	3.99681	3.80787	4.86945	4.47771	5.46743
ENSG00000013725.14|CD6	0	0.044802	0	0	0	0	0	0	0	0	0	0	0	0	0	0
ENSG00000013810.21|TACC3	14.3495	13.2055	16.1171	20.718	17.1973	16.0758	16.8865	18.7289	43.0833	52.8325	43.3108	45.7256	27.8339	28.974	16.2304	16.9127
ENSG00000014123.10|UFL1	14.9007	14.4175	13.5979	16.112	21.2984	17.6783	18.131	16.4817	9.94686	14.1431	13.0804	11.5582	14.9871	14.7915	12.4693	15.3789
ENSG00000014138.9|POLA2	4.01096	4.49133	3.8363	5.13248	5.74451	4.17243	5.17071	4.73004	13.3092	13.4875	11.6109	7.82092	9.87084	9.9974	7.70894	7.68623
ENSG00000014164.7|ZC3H3	19.8002	20.8961	16.9728	17.8842	21.5703	19.3622	19.0306	22.9416	26.9892	27.4981	30.1936	22.5798	21.3017	25.9286	21.3538	19.2103
ENSG00000014216.16|CAPN1	146.646	140.289	148.828	131.748	138.75	144.812	160.971	151.796	152.357	150.543	178.806	149.956	155.3	161.103	158.453	167.941
ENSG00000014257.16|ACP3	0	0	0	0	0	0	0	0	0	0	0	0	0	0	0	0
ENSG00000014641.21|MDH1	101.183	96.5165	81.149	102.856	94.9255	97.2345	93.2676	87.6393	113.52	108.224	92.0424	121.093	110.361	101.829	92.3443	113.787
ENSG00000014824.14|SLC30A9	18.3431	17.9268	16.3899	23.9282	16.0034	24.9146	22.1794	21.9143	33.5859	21.6827	24.7525	20.8582	37.3106	22.4391	26.3349	28.8263
ENSG00000014914.21|MTMR11	17.3841	23.6245	26.3299	27.1402	23.3092	23.0774	31.0469	25.0658	10.1868	15.2602	8.6205	11.0576	12.4964	11.3824	11.2969	12.6185
ENSG00000014919.13|COX15	24.4514	23.8019	21.8532	24.1515	22.6468	20.4454	20.7656	24.2399	22.7039	26.4922	21.9706	22.8974	21.5767	23.1117	20.918	25.353
ENSG00000015133.19|CCDC88C	18.1144	16.4873	18.4115	19.4913	17.1672	16.7468	18.6953	19.8762	6.08581	4.6712	3.79506	4.86289	2.95773	4.78661	4.30862	4.33446
ENSG00000015153.15|YAF2	14.0201	12.4083	8.74324	11.6677	11.5331	10.4119	9.91936	10.7393	6.63188	8.80882	6.18582	6.71133	6.82174	6.75799	7.68425	9.27418
ENSG00000015171.20|ZMYND11	36.2633	34.312	31.9952	39.0324	40.7939	38.3966	38.8316	40.3554	38.4086	32.8539	37.3893	33.5128	41.8036	42.2077	34.1907	43.0493
ENSG00000015285.11|WAS	0	0	0	0	0	0	0	0.219394	0	0	0	0.193773	0	0	0.188799	0
ENSG00000015413.9|DPEP1	0	0.495636	0	0.192481	0	0.271882	0	0.348567	0	0	0	0	0	0	0	0.172714
ENSG00000015475.19|BID	32.4494	25.3213	25.9294	29.3835	35.7565	30.6853	34.8218	35.9221	24.8984	29.758	29.5005	26.242	26.7519	25.5253	28.5737	25.9271
ENSG00000015479.20|MATR3	72.4238	107.392	80.4075	126.306	120.463	103.751	114.054	81.4181	79.2627	90.3498	80.8881	36.632	97.4726	58.854	77.1506	65.8633
ENSG00000015520.15|NPC1L1	0	0	0	0	0	0.02505	0	0	0	0	0	0.021711	0	0	0	0
ENSG00000015532.10|XYLT2	26.1851	26.4456	26.035	24.0941	31.7829	29.9749	30.673	32.9263	23.9947	23.1236	23.5377	26.6759	24.7673	28.0845	26.8628	29.0343
ENSG00000015568.13|RGPD5	16.7925	14.7686	18.7558	23.1347	18.9537	18.7834	19.8959	19.5593	9.54219	12.809	8.57302	8.68332	10.8791	10.5647	13.9843	15.7319
ENSG00000015592.16|STMN4	0	0	0	0	0	0	0	0	0	0	0	0	0	0	0.133615	0
ENSG00000015676.18|NUDCD3	45.6013	43.5886	43.5256	44.2336	45.7301	47.3004	45.6619	44.7003	37.7712	36.4863	32.968	31.2146	31.0428	30.8351	28.6638	40.1256
ENSG00000016082.15|ISL1	0	0	0	0	0	0	0	0	0	0	0	0	0	0	0	0
ENSG00000016391.11|CHDH	0	0.036864	0	0	0	0	0	0	0	0	0	0	0	0	0	0
ENSG00000016402.14|IL20RA	0	0	0	0	0	0.085919	0	0.215405	0	0	0	0	0	0	0	0
ENSG00000016490.16|CLCA1	0	0	0	0	0	0	0	0	0	0	0	0	0	0	0	0
ENSG00000016602.9|CLCA4	0	0	0	0	0.200409	0.039577	0	0	0	0	0	0	0	0	0	0
ENSG00000016864.19|GLT8D1	62.2717	64.6682	58.0316	62.5821	70.7982	59.9227	67.9399	68.3306	56.2944	69.6283	50.9706	62.3266	64.0132	63.3246	57.6757	58.7392
ENSG00000017260.20|ATP2C1	77.4163	66.0334	64.4212	66.972	78.8109	70.6736	75.3261	72.3455	67.4971	68.2551	65.6595	64.7611	79.532	75.7246	71.9276	92.1737
ENSG00000017427.17|IGF1	0.068465	0.047523	0.077186	0.131642	0.145633	0.064775	0.007455	0.067207	0	0	0	0.000647	0	0	0	0
ENSG00000017483.15|SLC38A5	8.87565	4.10354	3.93004	4.35429	2.39675	3.38976	3.93036	4.93614	23.9432	24.9298	24.0437	26.6609	20.7425	21.7427	22.3565	18.0837
ENSG00000017797.13|RALBP1	48.9162	45.3965	47.5332	47.2898	55.5684	49.665	50.3681	48.404	44.956	40.6982	47.1133	42.3893	48.4653	52.006	43.8025	49.7803
ENSG00000018189.13|RUFY3	31.07	33.5367	39.0323	46.2325	34.7556	43.4984	51.2136	39.3029	16.6436	25.4449	21.5698	20.0981	25.2454	18.9687	26.8888	30.4069
ENSG00000018236.15|CNTN1	0.025538	0.008133	0	0	0.120249	0	0	0	0.023103	0	0.101576	0.057157	0.189856	0.096093	0.041025	0.163425
ENSG00000018280.17|SLC11A1	0	0.239762	0	0	0.058652	0	0	0	0	0	0	0	0	0	0	0
ENSG00000018408.15|WWTR1	125.584	125.127	128.91	135.559	148.575	145.161	140.55	147.294	115.274	116.785	125.598	106.16	162.83	161.172	136.995	165.062
ENSG00000018510.18|AGPS	41.7939	38.6876	37.4072	44.47	44.1091	39.7191	44.431	42.5344	44.502	41.8906	49.486	40.5871	56.3212	54.6848	50.1104	57.5965
ENSG00000018607.7|ZNF806	0	0	0	0	0	0	0	0	0	0	0	0	0	0	0	0
ENSG00000018610.15|STEEP1	19.0921	16.3287	17.4066	15.4223	18.4038	17.8275	15.2849	17.835	19.0989	24.9484	18.6446	20.5193	20.0683	18.0592	17.1691	18.8992
ENSG00000018625.15|ATP1A2	0	0	0	0	0	0	0	0	0	0	0	0	0	0.020191	0	0
ENSG00000018699.13|TTC27	16.0996	15.8295	16.0705	18.1199	17.0754	14.1042	17.5815	17.1735	24.7411	24.0357	24.4412	23.2352	22.5232	21.1455	22.1471	23.3105
ENSG00000018869.17|ZNF582	4.3655	2.59794	3.46726	4.56144	5.05055	2.84702	3.52776	5.79509	2.41332	3.59195	2.90622	1.8261	2.45925	1.44077	2.07891	1.09141
ENSG00000019102.12|VSIG2	2.63662	3.15134	2.7735	2.38373	3.05518	3.54244	2.13068	4.52888	0	0.559785	0.250594	0.456257	0.482671	0.293732	0.586481	1.23922
ENSG00000019144.19|PHLDB1	88.7612	88.4535	106.469	103.556	116.916	105.128	100.034	101.991	78.7028	93.7386	72.3059	75.9691	110.281	110.842	118.739	133.058
ENSG00000019169.11|MARCO	0	0	0	0	0	0	0	0	0	0	0	0	0	0	0	0
ENSG00000019186.10|CYP24A1	0	0	0	0	0	0	0	0	0	0	0	0	0	0	0	0
ENSG00000019485.14|PRDM11	6.18833	5.47911	7.80987	4.40268	6.40615	7.22733	7.56011	6.66176	5.43972	4.86197	5.19571	5.01665	4.44085	5.2562	3.77316	4.45041
ENSG00000019505.8|SYT13	0	0	0	0	0	0	0	0	0	0	0	0	0	0	0	0
ENSG00000019549.13|SNAI2	2.9194	2.27927	2.67285	2.11558	1.28455	3.21449	2.21197	3.50737	0.216771	0	0.287385	0.757749	0.494762	0.707506	0.246198	1.27152
ENSG00000019582.16|CD74	0.587033	0.5377	0.451312	0.625762	0.605669	0.237435	0.04307	0.385871	2.63396	5.63648	2.87916	3.08002	1.49906	2.52417	0.968816	3.75635
ENSG00000019991.18|HGF	0.380613	0.355993	0.438344	0.323799	0	0.177714	0.52141	0.336694	0.389161	0.518023	0.520418	0.586401	0.33591	0.259801	0.344024	0.230959
ENSG00000019995.6|ZRANB1	23.2603	21.8791	20.917	23.0791	27.7817	23.9864	27.1274	24.2268	9.06366	7.80851	7.86876	8.09478	11.247	10.0943	12.0447	11.462
ENSG00000020129.16|NCDN	31.5637	25.0661	28.3327	24.59	21.4546	25.3771	30.4732	30.2323	17.5842	15.6945	15.6236	15.9555	15.5392	18.1444	14.3338	16.9559
ENSG00000020181.18|ADGRA2	16.1008	14.7554	17.4321	15.3294	14.2727	18.3823	17.5792	18.5195	12.2194	11.3413	10.772	11.0678	13.3114	13.8627	12.964	16.0796
ENSG00000020219.9|CCT8L1P	0	0.042358	0	0	0	0	0	0	0	0	0	0	0	0	0	0
ENSG00000020256.20|ZFP64	20.0352	15.975	22.4913	21.2659	21.5409	20.5525	18.0322	17.2793	19.1711	19.2523	15.7684	18.8032	15.8652	20.2209	17.4093	15.1193
ENSG00000020426.11|MNAT1	17.2235	14.3109	15.1612	17.6549	22.1947	15.5199	15.2541	20.0089	17.7163	24.4933	14.6873	17.4055	18.7793	17.052	20.2453	19.1024
ENSG00000020577.14|SAMD4A	124.452	101.104	93.674	117.056	138.724	110.883	124.547	135.402	65.9599	75.3286	59.4614	58.0774	80.8515	82.6773	97.8185	116.918
ENSG00000020633.19|RUNX3	0	0.066006	0.095838	0	0	0	0.204445	0	0	0	0	0.025003	0.070831	0.038403	0.039783	0
ENSG00000020922.13|MRE11	6.10744	5.28773	10.3342	7.2521	11.0922	6.86776	6.9536	9.10787	7.35322	11.6385	6.97331	7.18605	5.84534	8.8055	6.54151	6.08781
ENSG00000021300.14|PLEKHB1	1.52827	2.26666	1.87905	0.968293	0.94063	1.87421	0.111988	1.63558	0.323973	0	0.646861	0.245534	0.476896	0.486118	0.106184	0.657835
ENSG00000021355.13|SERPINB1	26.6885	23.9883	30.5984	30.8507	25.5696	34.0158	30.2941	31.0489	31.7005	36.1601	37.8763	35.0915	31.3896	37.2339	29.0578	33.6341
ENSG00000021461.17|CYP3A43	0	0	0	0	0	0	0	0	0	0	0	0	0	0	0	0
ENSG00000021488.13|SLC7A9	0	0.009714	0.272817	0.53085	0.275565	0.125949	0.626207	0.257934	0.331865	0.277145	0.009111	0.040878	0	0	0.104382	0.101709
ENSG00000021574.13|SPAST	9.61882	9.83618	12.7438	13.3525	13.1333	12.1745	11.4577	13.4924	8.02211	8.6612	10.4773	10.6977	9.21738	9.57938	10.0068	10.1858
ENSG00000021645.20|NRXN3	0.179198	0.295905	0.036077	0.644195	0.402087	0.202624	0.190447	0.235504	0	0.044217	0.01233	0.10202	0.022603	0.027462	0	0
ENSG00000021762.20|OSBPL5	31.7479	32.5379	36.5584	35.027	34.2786	36.2416	32.0486	36.1163	20.5541	29.3502	19.2061	21.9032	25.7867	27.403	30.8279	37.9591
ENSG00000021776.11|AQR	13.9131	11.7936	12.1279	14.7931	16.4704	13.4395	14.6819	17.1279	13.1312	14.8453	13.3051	11.5004	14.3395	13.9801	12.6899	15.6993
ENSG00000021826.17|CPS1	3.21527	3.36338	5.36289	4.74486	3.11908	3.91183	4.47314	4.14865	1.73722	1.79689	1.60224	1.11112	1.72968	2.00372	0.921605	1.98361
ENSG00000021852.13|C8B	0	0.120262	0	0	0	0	0	0	0	0	0	0	0	0	0	0
ENSG00000022267.19|FHL1	116.918	107.938	107.828	112.29	105.793	116.868	124.726	119.771	56.1363	57.7091	54.6572	50.5001	58.724	62.1279	52.2611	60.0399
ENSG00000022277.13|RTF2	87.0318	92.8492	80.1024	78.1614	70.2364	90.0323	96.2529	85.304	96.4178	89.3645	98.3714	91.6285	85.8843	91.2435	92.7375	95.1549
ENSG00000022355.18|GABRA1	0	0	0	0	0	0	0	0.051671	0	0	0	0	0	0	0	0
ENSG00000022556.16|NLRP2	0	0.068937	0	0	0	0	0.016928	0.03366	1.22385	1.33056	1.24444	1.79574	0.64569	0.892442	1.2847	1.38978
ENSG00000022567.10|SLC45A4	1.4136	0.960665	1.95712	2.15196	1.75892	1.45182	2.66752	1.66236	2.00426	1.60567	2.4169	1.78449	2.02093	2.22348	1.77482	2.07209
ENSG00000022840.17|RNF10	119.132	107.366	124.873	127.419	128.868	126.699	120.556	121.598	106.338	109.845	97.1212	98.3113	110.739	111.1	101.406	109.878
ENSG00000022976.16|ZNF839	11.8337	9.12012	14.8219	11.7753	10.735	14.3904	16.5974	14.1594	8.58409	11.1099	5.41642	7.23229	7.95322	6.81835	9.72552	8.18476
ENSG00000023041.12|ZDHHC6	30.6492	26.9566	36.0267	34.7593	38.121	37.3545	35.0573	39.4307	24.2868	26.6687	26.0295	25.3955	21.2619	24.0363	21.4608	30.7491
ENSG00000023171.19|GRAMD1B	4.25393	3.57638	3.70867	4.15956	4.61113	3.41387	3.35867	4.24792	2.72819	2.96043	2.01566	2.02925	3.94334	2.92388	3.09747	2.70426
ENSG00000023191.17|RNH1	203.245	213.285	205.234	172.239	229.404	217.218	218.817	227.225	254.68	250.398	274.961	244.762	252.897	257.997	227.113	237.456
ENSG00000023228.14|NDUFS1	20.2794	21.4118	20.5552	22.5821	22.3258	22.3858	21.7394	22.254	22.9582	24.8638	23.0338	21.0635	24.8851	25.0745	23.3628	27.2679
ENSG00000023287.13|RB1CC1	34.0418	30.0956	32.7976	35.0891	36.4605	34.0915	37.3182	36.3794	10.7101	13.6306	13.7299	12.3941	12.7005	13.651	16.7146	20.586
ENSG00000023318.8|ERP44	34.0616	36.7233	33.2849	36.4533	39.5441	34.1754	37.9978	34.6329	26.7461	28.9379	28.404	28.88	29.0139	30.9388	28.6634	31.7803
ENSG00000023330.15|ALAS1	87.3377	79.1137	94.2964	80.4282	106.548	87.8852	99.2452	99.0071	65.905	61.8386	69.3699	71.5633	70.4806	70.3828	69.4987	77.5858
ENSG00000023445.16|BIRC3	19.1842	19.6254	18.9733	19.9095	18.4416	19.3694	21.9718	19.1517	14.1273	14.5599	16.2539	13.997	22.6608	22.3038	20.8708	26.6721
ENSG00000023516.9|AKAP11	19.0897	15.5592	17.6723	20.0997	21.9043	20.3922	20.8919	18.899	13.4279	12.9639	14.2092	11.7073	14.9278	16.0829	12.6879	18.1747
ENSG00000023572.10|GLRX2	18.0981	17.2546	8.46894	18.6501	13.0027	22.9164	19.9262	22.2368	21.9958	30.912	23.3377	24.4395	23.1788	17.6154	27.5882	19.0318
ENSG00000023608.5|SNAPC1	39.8644	33.9371	37.0338	39.4935	36.8576	36.4177	39.5798	40.1952	16.1744	19.0385	16.6828	18.4202	18.1625	21.4391	19.94	18.879
ENSG00000023697.13|DERA	29.5017	31.8396	25.0785	35.3758	27.2699	40.3912	33.9974	34.3565	63.3217	65.2721	64.6275	67.3158	57.102	53.3974	57.808	56.358
ENSG00000023734.11|STRAP	148.38	138.757	145.927	162.5	159.632	147.722	152.599	142.769	193.436	205.749	205.689	188.151	205.222	193.484	196.518	185.564
ENSG00000023839.12|ABCC2	1.59601	0.980762	0.790658	2.42493	2.50433	2.12465	1.98727	1.54312	0.254811	0.274868	0.097088	0.331089	0.210776	0.316334	0.422067	0.348454
ENSG00000023892.11|DEF6	0.966388	1.44997	2.42478	1.10592	1.39855	2.66858	0.883865	1.15419	0.311712	0.707735	0.483562	0.491154	0	0.398167	0.298561	0.504905
ENSG00000023902.14|PLEKHO1	108.639	91.723	89.3075	92.1593	99.4886	101.702	98.405	98.2705	80.7638	77.1476	85.6263	85.0477	91.5832	96.2818	92.2881	108.919
ENSG00000023909.10|GCLM	73.231	61.2444	62.9168	75.7068	69.5928	64.3224	72.4584	70.0914	30.7701	37.2253	35.4943	34.2236	30.7647	31.0155	29.0658	31.9929
ENSG00000024048.11|UBR2	17.6357	17.201	17.3987	19.5883	18.2467	18.0555	18.8776	19.2308	12.7272	13.0102	11.7016	11.4379	15.1713	15.1979	12.5836	15.6758
ENSG00000024422.12|EHD2	219.461	197.062	223.742	190.422	227.612	217.543	217.152	214.177	209.008	202.742	229.904	207.469	223.523	241.77	217.285	223.922
ENSG00000024526.17|DEPDC1	0.217545	0.116282	0	0.034332	0.232416	0	0.119128	0.041649	3.60365	5.66971	5.52422	4.75651	4.77707	3.22045	1.82909	2.89776
ENSG00000024862.18|CCDC28A	20.4922	21.5262	16.8215	16.9314	29.9916	19.2121	16.8297	22.6354	12.4914	13.8252	11.3876	12.5834	9.62278	13.5633	11.9416	11.9845
ENSG00000025039.15|RRAGD	3.44666	2.65249	2.75489	3.30371	3.33962	2.57193	3.90775	3.87632	3.90278	4.35586	3.85391	3.64299	5.32118	5.01536	5.02787	5.53843
ENSG00000025156.13|HSF2	7.69852	8.31254	9.17685	11.6024	10.1466	10.7766	12.513	13.3895	6.46071	10.7028	6.68059	6.6883	7.86748	8.25195	7.20256	9.24259
ENSG00000025293.17|PHF20	29.8134	29.7439	33.8657	33.4769	39.7814	31.845	37.8221	33.7288	24.9074	36.0665	26.9818	27.2318	28.2053	32.0256	35.103	32.8813
ENSG00000025423.11|HSD17B6	0	0.08018	0	0.901962	0	0	0	0	0	0	0.23774	0.493605	0	0	0.103486	0
ENSG00000025434.19|NR1H3	3.14815	2.24342	2.38517	4.05862	4.52754	3.51749	1.36535	3.59426	4.28885	5.87778	3.96328	3.77569	3.32595	2.93988	4.36161	6.60946
ENSG00000025708.14|TYMP	55.6115	51.4104	50.868	51.1012	50.9645	55.842	49.0162	49.789	72.4558	97.448	89.0533	96.5472	73.0736	88.0832	79.0985	70.306
ENSG00000025770.19|NCAPH2	31.7629	22.4122	27.6411	26.5898	27.3993	26.0008	20.471	28.1958	31.1344	33.2619	28.595	27.3735	21.923	24.2805	20.0063	22.6127
ENSG00000025772.8|TOMM34	45.3253	44.717	37.7158	48.4753	45.4996	42.4996	47.9637	47.6076	56.5613	58.0264	54.5657	53.8786	44.9162	51.5573	42.382	46.3955
ENSG00000025796.14|SEC63	39.4976	36.9876	34.0319	41.6067	42.4147	36.2176	40.4791	41.8532	27.4401	33.625	26.2348	30.0518	32.1019	33.8052	33.6129	38.3604
ENSG00000025800.14|KPNA6	43.4698	36.5457	41.7354	43.202	47.9642	42.6226	42.7862	45.5587	52.4368	44.9045	47.9396	45.2738	54.8138	56.4858	46.7883	53.7467
ENSG00000026025.16|VIM	6475.18	6349.21	6549.6	6169.46	6483.89	6628.58	6771.9	6885.66	6345.03	6073.75	6819.45	6353	6464.98	6688.86	5752.93	6210.68
ENSG00000026036.22|RTEL1-TNFRSF6B	6.62434	6.88391	9.15996	10.8204	14.1998	10.8355	10.637	14.8705	3.60074	6.93404	2.51583	6.60025	2.08544	4.86165	4.17431	9.77673
ENSG00000026103.22|FAS	20.874	17.8966	21.3281	25.8396	18.5772	30.2128	25.0792	20.5145	14.2078	13.3536	13.0473	14.8698	21.5213	20.2917	17.6039	20.1991
ENSG00000026297.17|RNASET2	11.3117	15.852	18.1468	17.3573	17.1016	14.4091	10.4894	10.7098	14.9283	9.23833	9.42989	8.53394	6.1279	6.316	8.62626	10.8013
ENSG00000026508.20|CD44	121.965	114.74	125.518	129.069	144.43	131.735	126.037	130.971	171.925	183.529	163.091	167.843	218.034	216.842	196.106	230.569
ENSG00000026559.14|KCNG1	5.41168	3.61436	5.79787	3.45352	2.87831	3.69523	3.40653	3.82846	0.863519	1.0482	0.76367	0.458043	0.540441	1.1145	0.465711	1.70661
ENSG00000026652.15|AGPAT4	9.09854	6.2924	6.78592	7.36993	7.60935	8.18959	7.95613	8.43174	2.67615	3.16087	2.59597	2.87452	4.43029	3.69522	4.03636	5.1712
ENSG00000026751.17|SLAMF7	0.15619	0.389019	0.339765	0.274251	0	0	0.092404	0.058946	0	0	0	0	0	0	0.080358	0
ENSG00000026950.17|BTN3A1	18.5555	17.6869	23.1323	18.1977	22.622	21.8579	23.6049	20.3396	11.7921	11.434	11.0047	12.2161	13.2189	12.9278	12.1626	12.3266
ENSG00000027001.10|MIPEP	10.7672	10.5924	11.0554	10.4017	12.871	9.92368	14.3518	12.3811	18.3121	18.5599	19.7984	20.1648	18.4246	16.9015	19.127	20.0344
ENSG00000027075.16|PRKCH	79.8747	75.2965	80.7595	82.1859	85.299	88.226	90.6887	86.4459	61.5377	64.9125	52.8896	54.5105	54.9857	58.5665	54.1622	62.5617
ENSG00000027644.5|INSRR	0	0	0	0	0	0	0	0	0	0	0	0	0	0	0	0
ENSG00000027697.15|IFNGR1	62.0649	59.3408	54.106	63.9693	65.6174	63.0291	70.7869	66.1828	43.854	50.0146	42.8624	46.0608	57.3151	52.4642	44.2272	50.788
ENSG00000027847.14|B4GALT7	41.7779	38.5429	34.4897	34.3513	41.095	48.9539	32.4152	47.1391	40.5028	46.2589	42.9218	45.5352	44.6506	46.7867	39.6696	43.4712
ENSG00000027869.12|SH2D2A	0.486486	1.27557	3.02957	1.5295	1.12777	1.99264	1.51022	1.38302	2.29916	1.59333	2.19516	2.24428	3.98552	0.665487	1.9715	1.7581
ENSG00000028116.18|VRK2	21.4067	23.0268	19.7466	20.3857	24.3745	24.832	23.4605	27.7535	29.682	32.1666	32.122	31.1349	34.4146	33.1756	28.2889	32.374
ENSG00000028137.19|TNFRSF1B	6.89887	6.40273	4.80723	6.52142	9.26125	6.6005	6.84715	6.11649	14.479	17.4724	15.0932	15.6767	12.2682	13.9571	10.9278	12.5475
ENSG00000028203.18|VEZT	55.7795	50.5928	59.3628	63.6975	62.1416	66.7711	57.058	61.6824	32.7818	34.408	34.104	39.0932	42.5018	41.5865	47.2345	51.5065
ENSG00000028277.21|POU2F2	21.4612	20.918	23.9303	24.5082	26.6377	26.5926	24.4828	25.9579	13.2336	13.5223	10.8588	12.621	10.4918	10.8966	11.0145	10.2998
ENSG00000028310.18|BRD9	36.4467	34.3938	43.3183	40.9203	46.4761	35.239	42.6588	41.7796	39.0583	39.27	34.2139	34.5687	40.722	37.4705	32.9122	40.3763
ENSG00000028528.15|SNX1	41.8475	39.8599	48.0279	47.6902	45.9777	49.8924	47.0007	64.9914	27.8367	38.953	23.8532	29.2874	29.7372	27.4936	32.6322	29.0535
ENSG00000028839.10|TBPL1	12.4174	12.1115	8.30834	12.8952	11.3159	17.0965	8.24222	15.7686	8.58139	8.52481	13.9186	9.61968	11.4163	15.0397	10.5564	16.9415
ENSG00000029153.14|ARNTL2	20.0662	22.3477	32.1139	27.0198	21.2951	21.734	20.2114	21.375	26.0496	24.9498	27.6507	28.3246	28.5135	29.2895	25.6402	28.9917
ENSG00000029363.17|BCLAF1	45.2861	52.2137	40.9922	50.506	56.8534	46.792	61.416	61.7401	41.9347	43.0617	40.5737	36.9018	46.1577	41.5274	38.2701	54.3144
ENSG00000029364.12|SLC39A9	48.3307	37.3827	40.7428	38.8525	47.2939	37.3835	40.3529	40.435	34.9043	31.7609	36.9011	28.74	38.717	46.9316	33.0598	46.3525
ENSG00000029534.21|ANK1	0.443494	0.326498	1.00407	0.334759	0.458779	0.280202	0.331454	0.34162	0.147069	0.091409	0.13806	0.179656	0.141391	0.254882	0.081259	0.50891
ENSG00000029559.7|IBSP	0	0	0	0	0	0	0	0	0	0	0	0	0	0	0	0
ENSG00000029639.11|TFB1M	9.25749	11.8355	13.1267	15.2557	14.8114	10.5372	10.6298	12.3729	11.9215	14.6823	13.6746	11.6983	11.9787	10.5571	17.0324	18.7323
ENSG00000029725.17|RABEP1	41.184	37.2465	43.4285	43.291	43.2179	44.386	41.1966	44.6244	30.7299	30.5279	31.346	33.1823	33.1696	30.5262	28.7613	34.9985
ENSG00000029993.15|HMGB3	10.2222	9.70888	10.3144	12.0127	10.6026	9.36226	10.1058	12.0202	24.5672	14.7844	17.394	19.0188	20.1834	18.7085	20.8871	19.9283
ENSG00000030066.13|NUP160	13.7062	12.9632	14.4738	13.7848	14.838	15.7262	13.6906	15.8278	18.4761	20.8095	19.8694	15.009	17.7779	18.8353	19.5417	19.3296
ENSG00000030110.13|BAK1	27.6477	23.6945	24.0223	22.9698	25.9486	24.5448	26.5386	25.5458	47.4192	42.4363	49.3579	45.5097	49.6622	49.6555	41.9284	46.3556
ENSG00000030304.14|MUSK	0	0	0	0	0	0	0	0	0	0	0	0	0	0	0	0
ENSG00000030419.17|IKZF2	0.520466	0.393837	0.365019	0.266555	0.504665	0.495425	0.20656	0.34241	0.207233	0.160523	0.235203	0.241527	0.163373	0.164206	0.153033	0.161642
ENSG00000030582.18|GRN	1375.74	1272.98	1207.86	1214.45	1380.32	1397.48	1548.02	1461.15	741.645	813.282	758.889	893.676	896.221	969.305	844.335	947.037
ENSG00000031003.10|FAM13B	19.7149	17.4131	15.8643	20.1478	20.2295	17.2322	21.3524	20.9411	9.09351	10.0773	7.78584	8.80246	8.24741	11.3088	10.5795	11.809
ENSG00000031081.11|ARHGAP31	29.262	28.4493	30.9074	29.0508	33.2879	28.4516	29.8758	31.593	35.467	29.1775	31.6939	27.0582	43.9352	42.4425	35.2189	44.0815
ENSG00000031691.7|CENPQ	4.46867	1.9704	2.7976	3.19151	5.27487	3.14197	2.01793	3.46517	4.79378	5.97564	5.16969	5.8292	3.29624	3.88989	2.5966	3.08711
ENSG00000031698.13|SARS1	238.963	233.862	248.858	242.594	229.526	239.532	245.528	243.084	244.699	203.593	214.31	203.902	217.313	202.888	194.718	200.761
ENSG00000031823.14|RANBP3	56.0818	45.1547	53.3565	53.083	65.4861	55.0718	57.596	53.5633	38.7976	42.9922	40.0212	39.7594	42.7872	47.5919	40.3733	35.2538
ENSG00000032219.19|ARID4A	17.5854	18.0801	18.2927	20.0223	18.5942	21.0486	22.1948	18.0495	6.42979	6.97777	6.10434	5.67393	7.46504	8.10285	6.94439	11.3687
ENSG00000032389.13|EIPR1	22.2108	26.3905	22.6731	26.6991	21.6329	31.9636	24.8293	25.389	36.9044	35.9985	33.6687	36.0972	34.2444	35.9378	36.5381	34.4932
ENSG00000032444.17|PNPLA6	87.1184	74.595	91.4637	77.2427	77.7107	92.7626	75.658	79.3032	64.0597	71.6891	65.7548	63.244	66.0604	76.5584	65.9081	71.5743
ENSG00000032742.18|IFT88	10.1338	9.95923	10.5167	15.9343	12.1561	11.4608	11.3022	10.4573	4.1578	5.97374	7.35534	7.93493	7.32421	8.26164	7.62231	8.32297
ENSG00000033011.14|ALG1	20.0779	19.7561	19.4087	21.6483	24.0015	16.8057	28.4957	23.8226	24.596	24.6422	30.0939	29.3264	22.9369	24.4077	18.7119	18.5542
ENSG00000033030.15|ZCCHC8	23.8647	20.3349	22.2051	27.5638	22.7868	26.5061	25.0415	22.8203	13.6439	17.3824	12.7011	11.7062	11.8216	11.5274	12.7409	13.9546
ENSG00000033050.9|ABCF2	47.3194	39.929	44.2158	38.0063	42.4043	47.4332	46.9363	49.3232	58.769	52.9559	56.6408	58.6748	53.652	52.9724	52.5796	55.7757
ENSG00000033100.16|CHPF2	102.247	89.1311	98.279	93.2016	108.553	103.015	111.948	117.209	64.084	78.1019	63.3121	72.5502	68.0279	72.9443	72.2149	68.3662
ENSG00000033122.21|LRRC7	0.04757	0.005079	0.000596	0.001352	0.016278	0.018362	0.034248	0.090798	0.018093	0.025473	0.025813	0.031343	0.030804	0.038974	0.003827	0.024343
ENSG00000033170.17|FUT8	10.0978	12.9767	11.0967	12.3236	12.5401	12.2548	10.2859	11.2385	10.5592	11.9229	11.3495	9.98737	14.171	11.1494	10.9827	13.7808
ENSG00000033178.13|UBA6	21.9904	21.1086	22.0746	27.5608	26.9873	26.9246	27.6088	28.3456	18.3787	21.8291	22.1916	20.2316	29.6251	29.161	28.7381	33.5956
ENSG00000033327.13|GAB2	23.5292	26.6277	27.9328	27.6067	25.2434	26.2298	27.9092	25.393	21.792	17.2329	17.4836	17.942	23.5332	23.1129	22.3796	24.8977
ENSG00000033627.17|ATP6V0A1	56.2514	55.4511	69.5125	64.6077	64.479	59.5462	57.2086	59.5547	52.868	57.5955	51.2861	51.5954	47.0638	58.8369	57.9712	63.2876
ENSG00000033800.14|PIAS1	10.0247	9.81051	13.1226	12.3929	12.6394	13.3074	15.0802	12.7297	6.46826	9.13414	7.41832	6.89549	8.32105	9.6257	11.1897	11.9121
ENSG00000033867.16|SLC4A7	43.3912	39.9302	41.4353	53.5154	48.1105	49.5131	52.772	51.7952	15.9697	27.9278	23.1583	16.2477	25.4838	24.1935	20.7	28.1087
ENSG00000034053.15|APBA2	25.7167	22.692	29.5374	27.8604	27.9726	28.3326	27.2366	28.2839	27.1616	28.1165	27.8408	26.1567	27.9543	27.9574	28.1432	33.4947
ENSG00000034152.19|MAP2K3	67.1609	66.187	70.7919	68.2009	77.9048	73.6069	85.0682	74.6568	43.649	48.5575	47.1539	45.8731	42.8752	44.982	36.5707	47.0755
ENSG00000034239.11|EFCAB1	0	0	0	0	0	0.219473	0.493801	0	0	0	0	0	0	0	0	0
ENSG00000034510.6|TMSB10	2701.43	2780.44	2778.56	3085.58	2930.66	2941.61	2824.57	2682.16	4308.63	4219.87	4123.34	5059.93	4463.49	4248.39	5388.78	4041.25
ENSG00000034533.12|ASTE1	3.0111	2.79129	2.71713	2.55397	3.10247	3.464	3.38453	4.30151	4.82983	5.30132	3.71004	4.15824	4.96044	4.81423	3.05571	2.7838
ENSG00000034677.13|RNF19A	55.4872	45.6087	58.8669	59.9076	63.1648	68.1823	66.6781	65.5524	18.1105	18.9056	20.3692	19.4043	22.8671	21.5487	23.3181	24.8961
ENSG00000034693.15|PEX3	10.2325	9.10176	11.521	10.824	10.5442	14.8463	11.0847	11.0093	15.1807	14.6635	12.822	14.7826	16.0853	16.3046	13.4419	15.5403
ENSG00000034713.8|GABARAPL2	125.876	110.88	105.866	146.461	118.122	130.035	135.08	116.875	91.1634	110.707	84.9855	103.862	97.9832	106.05	100.373	102.425
ENSG00000034971.17|MYOC	0	0	0.270689	0	0	0	0	0	0	0	0	0	0	0	0	0
ENSG00000035115.22|SH3YL1	25.9889	24.9082	29.6752	36.763	38.3486	32.0645	35.9636	31.7915	9.04705	15.8273	12.6284	14.8337	12.8973	8.33693	12.0282	21.0912
ENSG00000035141.8|FAM136A	25.6211	20.1834	21.2594	23.5299	25.3505	25.3659	26.6992	21.5139	37.5413	40.9895	41.4991	38.8252	33.401	36.3752	35.691	32.3462
ENSG00000035403.18|VCL	140.435	117.961	124.139	127.371	153.924	129.976	155.738	139.075	138.475	121.997	158.665	115.946	190.117	186.987	121.612	163.326
ENSG00000035499.13|DEPDC1B	0	0	0.186043	0.269103	0	0	0	0.64287	2.07832	2.04565	2.43534	1.60749	2.46058	1.37872	0.713757	0.574358
ENSG00000035664.11|DAPK2	5.96927	7.22567	6.71278	6.35489	7.68588	8.95838	9.60995	8.93035	1.43221	1.22804	1.53602	2.4307	2.05974	2.22518	2.40919	1.77138
ENSG00000035681.9|NSMAF	33.4452	32.6518	24.0149	33.5997	33.7709	33.9223	34.797	37.0324	26.7349	30.3476	27.8154	26.5792	26.6786	24.3441	26.0699	30.7294
ENSG00000035687.10|ADSS2	88.4566	85.248	87.3512	98.9485	98.115	97.2296	105.215	110.067	68.2006	72.1608	71.6423	69.432	73.6872	66.8185	66.1248	72.4955
ENSG00000035720.8|STAP1	0	0	0	0	0	0	0	0	0	0	0	0	0	0	0	0
ENSG00000035862.12|TIMP2	375.015	328.729	371.537	356.405	416.062	393.153	437.912	437.596	214.128	231.413	218.165	219.874	234.954	256.094	217.399	235.173
ENSG00000035928.16|RFC1	21.3486	19.6161	19.2402	24.2805	20.2455	24.4464	23.3673	25.0657	20.3559	19.937	22.6681	21.4058	23.0334	23.0095	19.3976	24.9373
ENSG00000036054.13|TBC1D23	28.6743	25.599	30.6398	32.4773	32.3639	33.5976	31.8548	35.2355	19.3958	20.6192	21.4734	21.0882	26.2878	24.1932	20.9249	29.7008
ENSG00000036257.13|CUL3	27.1242	28.304	27.4503	31.6461	32.1583	28.3743	33.7972	30.1965	24.5806	28.5005	26.2731	24.6196	24.5155	26.1253	26.4347	29.6665
ENSG00000036448.10|MYOM2	1.84493	0.732704	0.430868	0.722947	0.233829	1.55484	1.40193	1.3439	0.277883	0.515598	2.35323	1.56752	0.566485	0.733619	1.10896	1.01427
ENSG00000036473.8|OTC	0	0.124856	0.255261	0	0	0.250489	0	0	0	0.229652	0	0.140453	0	0	0	0
ENSG00000036530.9|CYP46A1	0.226651	0.044525	0.167303	0.038924	0	0.192962	0.416219	0.165546	0.047893	0.133639	0.097701	0.141449	0.222783	0.083895	0.239129	0.168432
ENSG00000036549.13|ZZZ3	18.6783	18.2672	18.6126	18.4594	19.8181	20.4709	20.5206	17.59	15.5813	19.4562	15.5754	13.8228	16.7005	15.5485	17.1908	22.551
ENSG00000036565.15|SLC18A1	0	0	0	0	0	0	0	0	0	0	0	0	0	0	0	0
ENSG00000036672.16|USP2	0.248443	0.285392	0.850661	0.108875	0.477244	0.195355	0.319321	0.21267	0	0.173668	0.158089	0.220136	0.190024	0.163142	0.251079	0.103707
ENSG00000036828.17|CASR	0.098888	0	0	0	0	0	0.03422	0	0	0.013955	0	0	0	0	0	0
ENSG00000037042.9|TUBG2	24.3598	17.2781	32.2479	29.6688	29.4213	27.6663	28.2452	27.397	8.08804	14.375	8.4898	11.713	7.63585	9.95725	11.3431	13.9501
ENSG00000037241.7|RPL26L1	22.1274	22.2942	36.185	41.7118	29.8078	30.4313	30.6776	33.717	61.4352	63.1015	65.0247	69.0669	53.8152	52.8021	53.7713	57.0286
ENSG00000037280.16|FLT4	5.83787	4.07442	3.86248	3.83759	5.53308	5.97822	4.97386	6.41205	1.2212	0.955167	0.916751	0.823278	1.44694	1.35608	1.27617	1.3286
ENSG00000037474.15|NSUN2	68.4912	56.38	63.6362	67.1721	82.0314	75.8684	78.7658	75.7717	70.628	73.4615	65.7499	71.5708	70.5046	72.1342	68.2579	78.7075
ENSG00000037637.11|FBXO42	12.3248	13.0109	12.6577	13.8618	12.4728	13.7155	17.0533	12.381	9.1743	10.1523	8.15691	8.43595	10.9952	11.2817	10.1005	12.0952
ENSG00000037749.13|MFAP3	23.2512	25.1539	25.3228	25.8942	28.9643	28.4213	27.1363	25.6551	20.1197	22.0301	19.0101	17.6655	23.4488	23.023	19.1941	24.8879
ENSG00000037757.14|MRI1	34.045	26.7062	39.2017	40.5823	32.9348	43.7176	49.8941	45.4046	14.9968	23.2574	13.0245	16.1619	15.5264	16.9992	18.8177	16.6289
ENSG00000037897.17|METTL1	9.64136	8.90178	12.3667	9.58977	6.80342	9.39121	7.92037	8.11775	20.9894	20.3147	16.6305	19.6974	12.4206	8.88786	10.3588	12.7221
ENSG00000037965.6|HOXC8	0	0	0	0	0	0	0	0	0	0	0	0.044895	0	0	0	0
ENSG00000038002.9|AGA	14.5947	14.1306	12.4175	14.5918	15.4695	15.1098	14.6755	17.7107	14.3337	12.6323	13.046	14.7056	12.4464	14.2635	14.0572	17.5019
ENSG00000038210.14|PI4K2B	13.9662	11.8176	10.9385	14.2493	13.278	14.3253	15.3159	15.6407	21.1222	17.8067	29.178	23.7926	28.4698	28.3806	23.0481	23.5717
ENSG00000038219.13|BOD1L1	25.0747	22.903	31.3096	34.0178	31.4274	32.1308	30.0371	32.0112	12.9497	14.2963	12.5769	11.3081	13.0911	14.0341	15.7941	19.7965
ENSG00000038274.17|MAT2B	70.9152	80.8336	80.2675	84.8367	75.387	76.0439	69.2401	85.2881	77.8229	88.2279	67.3807	79.855	73.7617	87.7134	71.7998	86.391
ENSG00000038295.8|TLL1	0.498205	0.611038	0.849541	0.908578	0.913232	0.808076	0.874365	0.503757	1.85873	2.11375	2.03885	1.88211	2.62093	2.26533	2.51887	3.27872
ENSG00000038358.15|EDC4	43.734	36.2527	47.6908	39.7593	43.4903	43.6238	50.0284	42.4412	28.5878	37.0632	30.3881	30.8049	28.5528	34.9107	30.4944	34.3619
ENSG00000038382.20|TRIO	183.438	195.339	183.74	216.597	203.328	194.731	177.959	176.796	101.788	139.17	85.4323	92.1911	137.934	164.896	166.917	191.351
ENSG00000038427.16|VCAN	1.45352	3.26801	4.12195	3.88995	1.71347	4.64631	2.21943	1.60662	3.74875	4.49295	5.92638	3.73855	8.72147	6.91453	6.58104	6.01239
ENSG00000038532.16|CLEC16A	19.371	18.2022	18.2536	21.8994	21.9967	20.8646	22.927	19.9285	14.049	18.3338	12.1818	13.9116	14.2785	16.5724	16.2831	19.032
ENSG00000038945.15|MSR1	6.02613	8.69436	2.11496	8.54147	10.462	5.75715	12.106	9.97456	1.03723	1.2586	1.46017	1.54291	0.826048	0	1.83219	0.679549
ENSG00000039068.20|CDH1	0	0	0	0.374267	0	0.052568	0	0	0	0	0	0	0	0.025554	0	0
ENSG00000039123.16|MTREX	35.5415	33.996	36.805	36.003	42.0689	37.0386	41.3721	34.4459	35.8921	37.9898	38.9501	38.5075	38.9642	33.4362	36.318	39.7181
ENSG00000039139.11|DNAH5	0.805318	0.587384	1.05855	0.627906	0.708194	1.01103	0.928388	0.76283	0.211396	0.112046	0.18178	0.130525	0.190027	0.158793	0.192334	0.406455
ENSG00000039319.17|ZFYVE16	17.0367	18.0111	15.6216	20.2575	22.738	19.5583	18.0671	19.731	11.4206	15.5013	11.0316	12.226	13.4758	12.4521	12.7726	16.4178
ENSG00000039523.20|RIPOR1	125.425	116.473	139.862	133.092	127.431	147.198	151.621	147.021	114.831	124.441	104.199	107.271	110.881	128.08	114.588	126.427
ENSG00000039537.14|C6	0	0.116417	0	0	0	0	0	0	0	0	0	0	0	0	0	0
ENSG00000039560.14|RAI14	228.528	235.315	264.599	291.629	305.099	262.115	280.704	266.723	152.417	154.496	150.515	156.313	203.379	185.733	203.386	216.158
ENSG00000039600.11|SOX30	0	0	0.127327	0	0	0	0.115829	0	0.068109	0	0	0	0	0	0	0
ENSG00000039650.12|PNKP	92.8748	73.5192	109.807	94.8697	105.026	95.2564	109.101	102.53	46.5958	77.9133	49.146	56.6245	46.8014	54.9434	66.5777	55.371
ENSG00000039987.7|BEST2	0	0	0.2089	0	0	0	0	0	0.071263	0	0.089402	0.150616	0	0.074262	0	0
ENSG00000040199.18|PHLPP2	5.33766	5.47412	5.60755	6.44601	5.66822	6.50546	7.16138	5.76279	6.33702	4.43686	4.74142	4.57085	6.77377	5.21512	5.43253	7.74674
ENSG00000040275.17|SPDL1	12.8283	9.0087	15.3656	9.89536	7.33771	12.4607	13.0862	17.171	15.7692	19.8059	15.9611	18.7574	14.6423	16.679	18.1181	17.6502
ENSG00000040341.18|STAU2	30.6653	26.4677	29.3271	28.3437	33.0639	30.4603	33.7087	32.09	21.9781	21.818	24.201	21.9711	25.1651	25.3369	23.1522	29.6062
ENSG00000040487.13|SLC66A1	36.5976	28.5888	27.0487	25.8299	26.5947	28.2109	36.5438	33.9275	19.3169	24.7821	19.2349	20.3782	16.6944	21.3308	18.8476	22.1282
ENSG00000040531.16|CTNS	47.6112	40.7544	45.1334	47.118	44.9543	51.0418	46.4971	53.2321	39.5876	31.0837	31.1774	30.6426	28.0778	36.5543	30.6625	32.9084
ENSG00000040608.14|RTN4R	0.903897	0.143754	1.06461	0.837143	0.150875	0.269391	0.321226	0.320326	0.376676	0.219481	0.647175	0.21257	0.395441	1.10311	0.335308	0.163882
ENSG00000040633.13|PHF23	51.0494	50.301	50.3152	47.3068	47.3628	55.536	57.9585	54.6006	59.9583	62.9443	56.2968	62.6002	58.2908	64.6643	69.945	61.2167
ENSG00000040731.10|CDH10	0.726456	0.919851	2.20147	1.31148	1.8585	1.90309	1.32888	1.42723	0.083107	0.48387	0.291384	0.281539	0.321452	0.371024	0.958431	0.837058
ENSG00000040933.16|INPP4A	17.4063	15.4349	16.6524	14.8108	19.2811	17.9702	16.7321	18.0851	9.26483	10.2487	8.93857	8.48043	12.0325	11.6632	12.7318	13.2107
ENSG00000041353.10|RAB27B	0.233566	0.173546	0.449713	0.764376	0.692098	0.433816	0.703837	0.394295	0.106123	0.101172	0.081383	0.076158	0	0.047599	0.073598	0.265594
ENSG00000041357.16|PSMA4	110.456	119.426	77.5165	107.491	129.126	142.745	134.268	163.614	221.814	163.936	236.509	208.803	220.215	227.539	238.587	213.01
ENSG00000041515.16|MYO16	0	0	0	0	0.072898	0	0	0	0	0	0	0	0	0.023186	0	0
ENSG00000041802.11|LSG1	54.8015	46.459	53.2528	60.8983	58.4366	55.0117	57.5491	57.0882	46.6183	50.145	45.7809	47.6478	49.0465	43.8587	45.6835	54.7915
ENSG00000041880.15|PARP3	15.6627	13.6106	12.9939	20.3424	16.5149	17.1183	21.1567	17.6694	12.6298	12.7333	10.5054	12.0772	10.3726	15.16	14.5586	13.4399
ENSG00000041982.16|TNC	0.148769	0	0	0	0.189783	0.11783	0	0.098917	0	0.01826	0.015327	0	0.07577	0.143856	0.030971	0
ENSG00000041988.15|THAP3	20.1044	26.1059	16.4056	24.827	20.2343	19.6187	18.252	18.1215	19.5785	23.0551	23.9981	25.3509	22.1794	20.6776	20.1249	23.188
ENSG00000042062.13|RIPOR3	2.82762	1.88251	1.09068	1.84223	2.09692	1.85822	2.01496	2.29424	0	0	0	0.144568	0.069627	0	0.078252	0
ENSG00000042088.14|TDP1	12.2659	10.379	10.1221	11.2399	10.8332	12.1261	13.8435	12.1886	12.7949	17.3239	12.2929	13.0481	16.2012	13.6204	11.8997	15.2907
ENSG00000042286.15|AIFM2	22.4631	25.4433	24.4208	20.9628	21.6129	25.0867	19.0141	23.0671	15.724	14.3159	14.6176	16.0877	17.8869	16.4805	15.0274	13.6642
ENSG00000042304.13|C2orf83	0	0	0	0.104301	0.683242	0	0	0	0	0	0	0	0	0	0	0
ENSG00000042317.17|SPATA7	8.68307	11.3107	6.97587	9.46452	8.14308	12.1351	11.0131	11.2845	9.09168	14.8029	6.59679	6.80006	9.76395	13.1968	10.3338	11.9087
ENSG00000042429.12|MED17	21.5265	18.9982	14.7235	21.8101	21.5254	20.792	16.7698	24.5756	15.1225	19.1343	12.1989	13.3736	15.967	23.9277	15.5959	17.2903
ENSG00000042445.14|RETSAT	62.1617	66.1912	69.6685	67.9136	61.629	68.8285	65.8988	64.2269	36.6869	37.0382	35.9009	35.5027	38.7224	42.3064	35.6808	43.804
ENSG00000042493.16|CAPG	34.3717	31.3122	27.3824	28.9858	25.8733	28.8805	28.9787	33.502	47.6103	37.0766	53.8981	48.5698	48.3494	47.0126	45.0455	36.35
ENSG00000042753.12|AP2S1	268.076	276.654	244.181	270.067	235.512	245.419	249.345	285.308	369.194	351.579	367.473	368.517	291.021	296.124	358.443	288.669
ENSG00000042781.14|USH2A	0.003807	0	0.115902	0.0136	0.033698	0.002382	0.028894	0.003496	0	0.010938	0	0	0	0.007639	0	0.002001
ENSG00000042813.8|ZPBP	0	0	0	0	0	0	0.003694	0	0	0	0	0	0	0	0	0
ENSG00000042832.12|TG	0.864434	0.641618	0.707738	0.456851	1.11435	0.692737	0.374572	0.604327	0.119323	0.231407	0.142786	0.111913	0.262901	0.131643	0.157804	0.585382
ENSG00000042980.13|ADAM28	0.061244	0.218509	0.755428	0.041847	0.103116	0.040603	0.161183	0.108354	0	0	0	0.146714	0	0.046903	0.046214	0.189542
ENSG00000043039.7|BARX2	0	0	0.28093	0	0	0	0	0.052661	0	0	0	0.05658	0	0	0	0
ENSG00000043093.15|DCUN1D1	9.87031	9.89118	13.1985	9.94619	11.5902	10.6672	10.4375	10.5738	6.33307	8.18477	8.13289	6.17815	7.58746	9.3628	8.29975	9.39777
ENSG00000043143.22|JADE2	33.9729	31.0199	29.5949	28.136	39.9701	32.9791	34.2081	33.676	32.3004	35.7726	33.6137	30.8088	39.8238	43.9762	36.3239	42.6102
ENSG00000043355.12|ZIC2	0.097203	0	0	0.130878	0	0.043102	0	0	0	0	0	0	0	0	0	0
ENSG00000043462.13|LCP2	0.533743	0	0	0	0.72214	0	0	0	0	0	0	0	0	0	0.092906	0
ENSG00000043514.17|TRIT1	7.91675	9.05242	8.26124	7.27635	7.81508	9.9883	13.9137	8.20198	7.02672	10.1715	5.27226	7.24264	7.06938	9.17243	12.183	12.5818
ENSG00000043591.6|ADRB1	0	0	0	0.024426	0	0.078665	0	0	0	0	0.024083	0.08159	0	0	0.056532	0
ENSG00000044012.4|GUCA2B	0	0	0	0	0	0	0	0	0	0	0	0	0	0	0	0
ENSG00000044090.12|CUL7	26.9124	22.6684	27.4263	28.3846	31.7147	31.6166	33.2413	27.9408	21.6661	21.3051	20.5233	19.6944	22.0557	21.8422	18.7725	20.8386
ENSG00000044115.21|CTNNA1	282.968	266.348	290.751	318.778	314.953	316.092	308.45	346.906	292.99	316.899	307.858	297.098	327.964	357.713	316.4	358.192
ENSG00000044446.12|PHKA2	8.22955	8.16422	12.4231	11.2683	9.98365	12.9231	11.7155	12.813	5.16789	6.12397	6.69099	5.31571	5.88709	6.85024	8.56354	8.31221
ENSG00000044459.15|CNTLN	6.76347	4.37451	5.36812	4.53071	7.65132	5.29369	5.39245	5.45953	6.94247	8.09041	6.05692	6.03978	5.85701	5.45164	6.57954	6.716
ENSG00000044524.11|EPHA3	0.013547	0	0	0	0	0	0	0	0	0	0	0	0	0	0	0
ENSG00000044574.9|HSPA5	256.406	225.955	220.749	249.658	294.996	291.711	311.21	292.424	306.043	296.325	307.36	391.034	333.3	372.161	320.011	348.14
ENSG00000046604.14|DSG2	0	0	0	0	0.231676	0.12854	0	0	0	0	0	0	0	0.085593	0	0
ENSG00000046647.14|GEMIN8	13.164	12.6493	13.483	14.2889	10.7915	10.0591	15.8539	11.7564	7.49813	11.1662	11.5741	9.12013	8.33024	8.55892	11.1589	8.3937
ENSG00000046651.16|OFD1	8.61288	10.6129	8.65836	13.0329	9.62414	14.1378	11.8614	12.903	2.72413	6.20612	3.16641	5.58282	7.02947	6.04807	5.76611	7.7581
ENSG00000046653.15|GPM6B	0	0	0	0.108249	0	0	0	0	0.246865	0.227381	0.242445	0.186458	0.042643	0.188279	0.161573	0.085135
ENSG00000046774.10|MAGEC2	0	0	0	0	0	0	0	0.063202	0	0	0	0	0	0	0	0
ENSG00000046889.19|PREX2	10.1941	8.88382	10.0142	11.8779	12.4216	11.0569	12.1776	11.8495	16.2499	16.6064	16.5808	12.9783	21.697	19.9334	17.894	25.6668
ENSG00000047056.16|WDR37	21.0044	23.2923	22.9965	22.9091	27.0882	25.7783	24.8615	27.0896	18.1438	21.9533	16.934	19.4765	22.1152	20.8682	18.5217	23.7835
ENSG00000047188.16|YTHDC2	13.7787	14.8052	15.0521	15.9316	18.6304	16.9556	17.416	17.0274	14.2614	14.9732	13.1941	12.6329	14.3243	15.147	14.6353	18.5976
ENSG00000047230.15|CTPS2	9.416	9.70077	12.4362	11.0193	11.4218	11.3062	11.5806	13.1396	11.3114	12.7935	10.6344	9.45425	10.0921	10.5259	12.4459	13.3892
ENSG00000047249.18|ATP6V1H	67.7541	68.9356	62.6675	72.2942	76.952	70.1765	74.017	67.221	71.5652	83.3769	70.7768	66.064	75.4437	71.6001	75.0323	74.5089
ENSG00000047315.17|POLR2B	90.0686	80.5352	83.0047	84.5316	115.797	98.9934	110.409	104.227	87.2864	87.6384	84.7872	92.1199	87.7179	91.8098	89.3503	99.4405
ENSG00000047346.13|FAM214A	45.926	42.0735	38.2122	55.2659	47.7894	43.1516	51.3653	54.8203	11.8303	19.7301	11.1897	14.1961	14.0485	15.7191	18.6196	16.9705
ENSG00000047365.12|ARAP2	0.019549	0	0	0.018824	0	0	0.034247	0.097557	0.072165	0.199313	0.136085	0.35075	0.216589	0.057216	0	0.276212
ENSG00000047410.14|TPR	36.0653	38.9832	42.4442	44.5022	44.0754	42.0202	47.6225	47.673	23.0092	28.9872	23.5204	25.8981	22.2348	24.0722	33.1118	40.1041
ENSG00000047457.14|CP	0	0	0	0	0	0.027141	0	0	0	0.009271	0	0.00689	0.006587	0	0	0
ENSG00000047578.13|KATNIP	16.2809	13.28	18.9425	18.3979	18.0993	19.1158	18.7333	18.3338	10.0397	8.28109	8.87125	9.02915	12.6144	11.1591	11.965	14.4148
ENSG00000047579.20|DTNBP1	30.9043	22.1056	20.5702	23.7216	26.394	25.3024	19.7336	28.2842	26.9363	27.2296	27.3253	30.0387	23.0179	27.0842	27.4044	25.2152
ENSG00000047597.7|XK	0	0	0.134653	0.058624	0	0.0428	0	0	0	0.156617	0.114866	0.042365	0	0.064106	0.099284	0.032504
ENSG00000047617.16|ANO2	7.50723	9.63403	5.98854	9.11126	8.05373	8.52059	5.89255	5.74831	0.669108	1.4559	0.448592	0.821866	0.624482	0.743685	1.01267	1.00832
ENSG00000047621.12|C12orf4	14.3461	10.453	12.0267	14.3273	13.5081	16.4526	13.5438	16.7464	13.8256	17.7939	14.7094	13.3227	13.2198	13.9428	14.0495	16.603
ENSG00000047634.15|SCML1	6.77824	6.59436	4.03233	8.98366	10.021	9.30558	9.14991	9.18577	4.6943	8.33364	5.42656	6.77611	6.1148	6.62969	6.43978	4.88948
ENSG00000047644.19|WWC3	33.0461	28.1402	30.4391	32.2986	37.0171	32.3311	36.1345	34.4825	28.5339	30.9025	21.7333	25.3562	32.0987	35.9793	28.1211	28.0853
ENSG00000047648.23|ARHGAP6	0.932937	1.42577	1.96912	1.69411	2.10189	1.25208	1.10502	1.2211	0.615784	1.18405	0.91425	1.01932	1.32254	0.665499	0.73659	0.552476
ENSG00000047662.5|FAM184B	0	0	0	0	0	0.04893	0.014337	0	0	0.047141	0	0.002047	0	0	0.018776	0
ENSG00000047849.22|MAP4	250.816	203.358	239.989	213.769	256.797	229.746	248.931	230.45	259.429	226.017	261.719	233.26	273.163	279.074	260.363	280.803
ENSG00000047932.14|GOPC	21.2357	18.96	22.767	22.9345	24.8586	25.2036	27.2672	25.1998	17.0191	19.2092	16.864	16.0365	17.9965	19.232	17.4921	19.728
ENSG00000047936.11|ROS1	0	0	0	0.03203	0	0	0	0	0	0.076481	0	0	0	0	0	0
ENSG00000048028.11|USP28	17.4797	15.7284	18.2327	15.8508	14.6776	15.4059	15.9673	16.7967	13.261	13.0817	14.7281	12.5509	15.7438	15.5019	13.992	15.4294
ENSG00000048052.23|HDAC9	41.2869	33.5046	35.447	40.1608	39.6525	36.6081	40.3537	41.8642	29.5657	34.8335	32.3506	29.1181	43.1371	40.7379	37.5882	52.8443
ENSG00000048140.18|TSPAN17	58.5052	55.7472	46.1163	49.7622	57.333	52.9641	54.8734	55.098	52.6837	51.0871	52.1502	48.2872	55.86	60.8319	52.4533	60.2339
ENSG00000048162.21|NOP16	38.3311	43.0626	40.8524	39.6775	28.5278	36.9811	38.9568	36.7443	67.3287	80.8179	79.2667	82.2683	58.3092	60.2657	59.1965	56.1921
ENSG00000048342.18|CC2D2A	11.1527	8.98732	11.3304	9.39514	11.1358	12.5971	12.4345	10.1031	19.9513	15.0782	14.9015	15.1685	15.5843	15.1359	16.4302	18.3143
ENSG00000048392.12|RRM2B	86.6988	86.9153	104.822	116.118	89.9503	96.2434	101.123	97.988	50.4609	54.9368	52.8181	43.8651	60.8301	57.6028	55.975	69.6268
ENSG00000048405.10|ZNF800	31.3261	29.606	22.4984	21.8701	27.4658	25.5762	32.4607	34.1423	15.4199	19.5121	18.8755	14.4994	17.199	19.3068	17.4065	15.9875
ENSG00000048462.11|TNFRSF17	0	0	0	0	0	0	0	0	0	0	0	0	0	0	0	0
ENSG00000048471.14|SNX29	13.4631	12.5037	12.1099	11.2114	11.1672	11.9166	10.8383	11.9766	11.7424	12.6611	10.9479	11.3894	13.6835	14.5353	14.8035	15.8634
ENSG00000048540.15|LMO3	0.02595	0.034057	0	0.030178	0	0.343155	0.024331	0	0	0.118834	0.101063	0	0	0.180804	0.089736	0.339516
ENSG00000048544.6|MRPS10	38.7707	33.2016	35.1332	40.7398	39.4692	34.604	36.9958	38.6039	52.6995	51.1097	52.8869	51.1685	50.2751	45.6755	42.6292	50.5698
ENSG00000048545.17|GUCA1A	0	0	0	0	0	0	0	0	0	0	0	0	0	0	0	0
ENSG00000048649.14|RSF1	26.2645	18.83	22.4764	19.6962	19.9874	21.9992	19.9247	21.077	9.19514	13.3638	12.3212	11.3962	15.2475	14.7513	14.2016	17.858
ENSG00000048707.15|VPS13D	15.2293	13.119	13.5443	12.1136	14.5727	14.6451	11.477	13.4168	14.1241	15.0958	13.1602	12.2969	17.5846	19.2284	17.3968	19.3462
ENSG00000048740.18|CELF2	20.534	18.6688	23.6621	31.8962	26.0852	17.0973	21.6259	25.6381	13.8512	13.2	16.7096	15.6546	15.5335	16.7189	16.4056	23.9524
ENSG00000048828.17|FAM120A	71.4857	69.5453	73.9443	74.1582	80.2454	79.8087	81.1501	80.3496	96.7128	94.4647	102.692	91.4384	107.786	112.518	89.8048	108.567
ENSG00000048991.17|R3HDM1	13.0243	13.5305	13.1093	19.2666	20.5896	15.3408	19.6664	16.2369	18.5517	21.0677	16.4662	15.3685	14.7706	19.0867	17.2974	19.7866
ENSG00000049089.15|COL9A2	0	0.395674	0.580372	1.49526	1.40917	0.399	0.782003	0.188509	0	0.095837	0.08572	0.096261	0.331936	0	0.233889	0.287799
ENSG00000049130.16|KITLG	33.3063	39.418	33.0654	35.7302	36.7426	36.6759	36.1254	39.2527	6.34746	6.56243	8.26126	6.13325	8.92359	6.88108	6.85286	8.52867
ENSG00000049167.16|ERCC8	9.11885	6.22888	4.75912	7.15637	4.04761	5.64582	4.10851	5.54891	4.83354	7.30998	4.71312	4.3912	4.50499	4.99408	6.73354	7.5218
ENSG00000049192.15|ADAMTS6	12.8372	11.479	10.2051	13.8959	13.2473	16.4401	14.976	13.4283	10.7084	22.0729	10.8001	12.2002	15.9678	17.0679	19.2463	21.3537
ENSG00000049239.13|H6PD	16.8303	14.3757	17.1255	17.8361	18.9109	17.8859	17.7001	17.7635	28.3551	28.7574	24.5919	25.5712	28.2194	31.6179	26.1713	29.0311
ENSG00000049245.13|VAMP3	130.179	133.023	134.634	148.237	153.048	148.015	141.543	143.252	199.223	206.261	211.519	199.242	205.714	210.611	196.59	205.345
ENSG00000049246.15|PER3	5.39452	4.04519	6.08942	6.72471	6.11574	7.34673	5.41557	6.38938	5.46425	6.62874	4.11134	4.03834	4.17102	5.07602	3.43504	3.68241
ENSG00000049247.14|UTS2	0	0	0	0	0	0	0	0.019373	0	0	0	0	0	0	0	0
ENSG00000049249.9|TNFRSF9	2.06751	1.91818	1.00245	1.33172	2.20643	1.36832	1.46369	1.32818	2.16155	3.00901	1.31638	1.35777	2.30033	1.97363	1.13305	1.23027
ENSG00000049283.18|EPN3	0.122456	0.228496	0	0.2836	0	0.616467	0	0.158233	0	0	0	0.027824	0	0	0	0
ENSG00000049323.16|LTBP1	28.0064	25.6176	30.9283	34.8926	33.2841	35.5921	37.127	31.9137	82.2514	74.6698	85.9076	87.9607	112.092	111.738	96.7066	120.25
ENSG00000049449.10|RCN1	620.915	590.563	595.872	638.073	663.958	638.093	641.344	631.435	336.25	338.05	336.225	346.915	333.417	329.647	340.281	346.815
ENSG00000049540.18|ELN	0	0	0	0	0	0	0	0	0	0	0	0	0	0	0	0
ENSG00000049541.11|RFC2	9.18013	10.5873	7.07498	9.20535	11.4212	11.5245	9.06071	8.03331	33.3685	29.8206	30.7406	34.0733	24.6137	23.0181	25.982	19.0538
ENSG00000049618.24|ARID1B	31.6969	29.7235	30.4748	30.7074	30.8164	26.4234	24.8687	26.8846	25.3474	33.4256	19.5277	21.4417	26.5723	29.4424	31.5115	37.9551
ENSG00000049656.14|CLPTM1L	93.9786	92.3311	107.277	88.1118	100.296	98.8681	101.848	99.9902	111.895	128.334	114.499	125.729	120.264	124.714	114.702	128.337
ENSG00000049759.20|NEDD4L	45.2861	40.7325	38.8738	47.0266	43.4606	48.9961	43.9234	34.7671	14.3888	16.7079	13.7946	12.5512	17.0369	18.1416	22.5605	30.0128
ENSG00000049768.17|FOXP3	0	0	0	0	0.552937	0	0	0	0.179462	0.225815	0.167714	0	0	0.109706	0.156398	0.067846
ENSG00000049769.14|PPP1R3F	4.35921	4.07444	2.7519	4.24069	4.49623	4.33811	4.28824	4.97407	2.31723	2.0846	1.48754	1.81442	1.75766	2.09589	1.78536	1.77493
ENSG00000049860.14|HEXB	264.306	260.658	241.822	244.028	290.065	299.077	285.264	266.855	193.976	235.321	196.723	228.389	221.227	228.465	218.733	222.107
ENSG00000049883.15|PTCD2	3.83686	2.69328	3.40431	4.54515	2.55122	3.30654	3.26602	3.07144	4.94802	3.23689	3.58445	4.27134	4.06863	4.00272	2.9489	2.89633
ENSG00000050030.16|NEXMIF	0	0	0	0	0	0.0412	0	0.007572	0	0	0	0	0	0	0	0
ENSG00000050130.18|JKAMP	44.1033	41.122	37.4721	43.9402	47.1196	49.3364	46.4054	52.6748	37.8776	38.1962	30.7596	36.4783	41.6658	41.6189	38.3783	47.9476
ENSG00000050165.19|DKK3	443.354	382.559	397.85	380.021	463.355	521.016	494.158	461.408	117.062	125.987	106.42	143.035	132.679	163.402	142.069	162.801
ENSG00000050327.15|ARHGEF5	3.40178	2.84654	3.34942	2.72236	2.50855	2.74482	4.0917	2.80611	2.05736	2.07613	2.13353	2.04203	2.6109	2.55525	2.86307	2.339
ENSG00000050344.9|NFE2L3	49.8439	50.9676	43.9894	46.1082	52.7257	51.2844	50.1775	54.7607	35.8432	35.0576	36.7565	37.1343	40.683	40.88	37.6058	44.7463
ENSG00000050393.11|MCUR1	8.57321	6.87075	8.09186	7.22602	6.18773	7.16948	8.71234	8.11968	10.8833	10.7699	10.0118	10.672	11.8653	10.4083	10.4113	11.155
ENSG00000050405.13|LIMA1	65.5561	67.9823	72.2631	71.8574	86.1605	75.5615	85.6611	74.7285	69.2544	59.1563	68.4228	67.362	69.5863	65.962	61.3852	70.7633
ENSG00000050426.16|LETMD1	45.7464	31.8026	48.1658	60.375	56.7053	46.0077	47.3868	46.216	25.7719	42.7118	21.9116	25.0202	24.0109	21.9208	26.8054	30.6973
ENSG00000050438.17|SLC4A8	3.83864	3.64145	5.2174	4.91678	4.87179	6.27672	4.35168	4.80239	2.9385	4.24062	2.08167	2.80321	3.28616	3.01938	3.93097	4.80531
ENSG00000050555.19|LAMC3	0.34655	0.496789	0.430816	0.633383	0.866522	0.202286	0.367147	1.06432	0.245865	0.473895	0.168108	0.14774	0.07429	0.112557	0.297752	0.260997
ENSG00000050628.20|PTGER3	0.102614	0	0	0.017414	0.136474	0.013966	0.201018	0.03592	0	0	0.022303	0	0	0	0.024606	0
ENSG00000050730.16|TNIP3	15.0882	10.6864	9.24998	8.61146	12.3029	10.9559	10.0839	13.3133	6.63285	5.21446	6.03975	4.83663	5.09736	5.72723	5.65297	4.09649
ENSG00000050748.18|MAPK9	26.032	22.9372	21.2923	27.1737	23.6843	25.4326	26.6146	25.9853	22.5967	22.4162	22.44	22.2652	24.5444	25.1305	22.6639	26.454
ENSG00000050767.18|COL23A1	0	0	0	0	0	0	0	0	0	0	0.036167	0	0	0	0	0
ENSG00000050820.17|BCAR1	190.88	184.913	208.26	196.278	216.158	209.619	207.086	229.607	142.664	154.177	171.12	178.412	226.251	263.99	248.705	249.855
ENSG00000051009.11|FAM160A2	23.6538	17.7571	24.0273	20.6646	26.7328	24.7624	22.7865	25.8436	7.35832	11.6177	7.43407	7.10762	7.78928	7.71493	6.9408	8.72838
ENSG00000051108.15|HERPUD1	83.4787	84.0866	82.8281	81.5439	85.543	78.5967	75.954	76.0417	40.8464	47.175	42.7258	50.0334	54.8602	67.8207	57.8763	63.9943
ENSG00000051128.19|HOMER3	202.241	197.583	191.231	172.129	223.517	208.119	206.753	212.115	89.9741	83.9773	87.4637	84.9396	83.1525	90.2819	92.2055	90.0536
ENSG00000051180.17|RAD51	1.29761	1.48633	1.50314	2.67534	1.98185	1.46458	1.28326	2.39206	12.0918	10.5352	10.4292	12.8704	8.60855	8.61803	6.96286	5.71731
ENSG00000051341.15|POLQ	0.179747	0.109393	0.037523	0.316562	0	0.75904	0.160591	0.217516	2.40375	1.59453	1.5729	1.82929	1.49067	1.3187	0.811768	1.01626
ENSG00000051382.9|PIK3CB	9.54423	10.0775	11.3201	13.2391	16.0027	11.1041	9.52996	9.85914	11.1016	12.8009	11.091	11.0187	10.2768	13.1211	9.48867	12.6801
ENSG00000051523.11|CYBA	61.7561	62.6145	51.0663	62.6086	48.7811	59.7907	56.6011	59.623	223.553	179.408	228.844	221.67	179.161	203.2	205.968	204.06
ENSG00000051596.10|THOC3	30.3215	26.1527	28.0038	30.6137	26.0836	31.6642	34.6574	31.083	50.8143	52.3143	49.145	45.5666	49.8404	47.7713	50.5129	54.3402
ENSG00000051620.11|HEBP2	15.8137	13.4322	13.0731	15.4874	17.9201	16.1627	18.4232	21.3082	14.3914	20.8354	18.6562	20.5462	15.2179	25.1936	29.6133	26.6842
ENSG00000051825.15|MPHOSPH9	8.98568	9.25865	5.61658	7.59951	10.4466	8.15929	10.2298	9.74587	5.50243	12.2865	5.9287	5.70453	5.01067	6.36614	7.10228	8.89106
ENSG00000052126.15|PLEKHA5	9.06725	8.70492	8.50047	9.2477	8.55096	8.00196	9.14891	11.7067	4.43782	5.2656	4.31027	5.1281	6.30731	7.57591	6.65223	8.84753
ENSG00000052344.16|PRSS8	0	0	0.617072	0	0	0	0.274976	0	0	0.304201	0	0	0	0	0	0
ENSG00000052723.12|SIKE1	11.2722	11.0197	10.3431	14.7622	11.7236	14.7665	14.4739	15.6597	9.40494	12.1307	10.3257	11.1801	10.1918	12.7298	11.4387	12.2241
ENSG00000052749.14|RRP12	30.5214	28.7035	37.5808	32.5378	31.5157	30.8824	32.744	30.9685	29.6402	32.2704	28.841	29.3302	26.6879	30.0607	28.5013	32.5196
ENSG00000052795.13|FNIP2	14.5937	15.1055	16.5527	15.6507	13.2735	13.7609	15.5687	17.6077	11.0109	11.2667	11.4778	9.61028	13.8868	15.2204	13.68	18.2423
ENSG00000052802.13|MSMO1	19.5958	22.7535	18.0154	22.166	22.2849	22.1587	24.299	25.0329	47.4463	58.4664	57.2431	60.9722	65.7729	65.7875	67.347	73.4656
ENSG00000052841.15|TTC17	70.5396	58.5131	59.9028	73.1828	81.1353	66.5088	77.0005	75.7739	30.8522	46.4901	26.0938	33.6339	33.5085	38.1383	42.2682	42.2766
ENSG00000052850.8|ALX4	0	0	0	0	0	0	0	0	0	0	0	0	0	0	0	0
ENSG00000053108.17|FSTL4	0	0.047306	0	0	0.033533	0.023435	0	0	0	0.020063	0	0	0	0	0	0
ENSG00000053254.16|FOXN3	21.9024	20.0505	23.8696	22.0542	25.9649	18.5107	26.5972	23.3646	20.9969	24.7212	19.8559	19.8809	26.8504	28.5044	25.7962	34.3267
ENSG00000053328.9|METTL24	0	0	0	0	0	0	0	0	0	0	0	0	0	0	0	0
ENSG00000053371.13|AKR7A2	47.3686	44.5525	41.9888	39.411	43.7668	37.7756	43.705	41.5844	52.2425	47.491	45.5249	46.9102	38.9956	45.4399	40.1562	43.919
ENSG00000053372.5|MRTO4	31.1571	25.7624	25.5112	31.3141	23.7328	28.3134	30.9621	33.5875	57.8711	56.8204	61.6931	62.09	46.3948	47.9669	44.0154	42.3818
ENSG00000053438.11|NNAT	0	0	0	0	0	0	0	0	0	0	0	0	0	0	0	0
ENSG00000053501.13|USE1	35.013	29.8163	31.954	34.3142	19.8424	29.7226	26.2604	27.3092	28.895	25.3584	24.795	24.2773	20.9792	24.9443	22.4786	19.7465
ENSG00000053524.13|MCF2L2	2.52913	4.20587	1.75381	4.52299	3.56949	2.63008	4.90083	2.86107	1.57667	1.84925	1.53042	1.12786	1.55755	1.50982	2.00416	3.14661
ENSG00000053702.15|NRIP2	0.055904	0	0	0	0	0	0	0	0.046371	0	0.033609	0	0	0	0	0
ENSG00000053747.17|LAMA3	3.66002	3.28011	5.94039	5.30907	4.6904	6.71037	5.63627	4.49806	1.44794	1.78816	1.08721	1.41468	1.74212	1.87698	1.35643	2.30504
ENSG00000053770.12|AP5M1	9.49975	10.294	13.8403	12.8821	13.6815	12.5026	11.2351	10.1064	6.90122	7.7888	9.89291	7.29699	8.95412	11.4729	7.03569	12.0398
ENSG00000053900.11|ANAPC4	20.713	19.7887	22.2256	25.1559	26.365	22.9794	21.6868	24.7722	18.7379	21.6388	17.7713	17.4158	17.1797	16.6221	16.3334	18.8443
ENSG00000053918.18|KCNQ1	0.071999	0.222133	0.054186	0	0	0.029072	0	0	0	0	0	0	0	0	0.202814	0
ENSG00000054116.12|TRAPPC3	101.783	106.257	99.7893	100.669	97.2215	128.231	111.099	105.584	105.575	122.672	107.451	115.714	110.676	112.386	105.737	109.668
ENSG00000054118.15|THRAP3	93.1019	84.5881	91.9327	101.571	110.828	103.771	110.488	98.346	80.706	77.309	78.3557	80.5937	86.5718	93.2369	78.5306	90.1729
ENSG00000054148.18|PHPT1	243.335	217.718	205.05	244.519	226.944	226.741	179.62	194.303	200.013	184.77	220.797	231.173	191.638	180.145	241.294	188.766
ENSG00000054179.12|ENTPD2	0	0.121439	0	0	0	0	0	0	0	0	0	0	0	0	0	0
ENSG00000054219.11|LY75	6.53813	4.94503	3.96357	6.36696	7.76196	6.32624	6.65639	6.00778	9.3972	7.87176	7.92144	7.62252	10.0305	9.3735	8.25404	10.001
ENSG00000054267.22|ARID4B	27.7992	30.2024	33.3912	34.8633	36.592	32.5443	31.4592	31.015	15.4629	16.9125	15.1522	15.6616	17.8222	18.9556	19.4732	25.4345
ENSG00000054277.14|OPN3	15.1451	13.9505	15.6455	13.8998	14.7925	17.7013	17.1867	12.8709	13.3172	15.5668	11.5281	13.7862	13.1278	15.0506	12.4385	15.1571
ENSG00000054282.16|SDCCAG8	32.1179	31.6857	36.6041	37.415	33.9606	34.2721	41.1472	36.9627	19.8408	37.2126	23.5801	26.3902	25.3117	24.8139	27.954	33.409
ENSG00000054356.14|PTPRN	0	0.020303	0.249746	0.018574	0	0	0.062333	0.243157	0.027639	0.109311	0.118514	0.098931	0.026703	0.120874	0.071213	0
ENSG00000054392.13|HHAT	1.72843	1.17321	1.44094	1.09648	0.646599	1.51548	1.61797	1.38324	1.71178	1.28072	2.37337	1.95186	2.09713	1.89164	1.99693	2.02519
ENSG00000054523.19|KIF1B	33.0462	27.9966	34.6924	39.5153	36.6348	35.2864	34.1798	34.3217	40.264	33.5882	31.2121	33.6197	39.1765	36.9604	35.6348	38.8432
ENSG00000054598.9|FOXC1	10.8896	8.93145	10.8691	8.86858	8.83843	9.95311	11.4619	12.1162	19.245	20.5004	21.1837	19.9042	31.9614	32.6396	28.277	34.092
ENSG00000054611.14|TBC1D22A	25.1826	26.2784	25.094	26.3053	25.315	22.7431	24.7444	23.025	25.4564	27.7468	23.976	25.9383	31.3862	33.1805	28.3907	32.7319
ENSG00000054654.19|SYNE2	3.33063	3.362	3.11412	3.85314	2.66185	3.16186	3.22131	3.44985	3.52639	4.46257	2.90107	2.57814	3.4698	3.73192	3.27287	5.62324
ENSG00000054690.14|PLEKHH1	0.182856	0	0.597735	0.073839	0.266484	0.551911	0.132576	0.109105	0.106732	0	0.044315	0.051217	0	0	0.079868	0.133266
ENSG00000054793.14|ATP9A	23.6933	20.178	22.2436	22.7804	25.4618	23.9117	26.4023	24.1075	14.2524	12.1187	11.9544	12.6645	16.2723	16.4368	13.978	17.5292
ENSG00000054796.13|SPO11	0	0	0	0	0	0	0	0	0	0	0	0	0	0	0	0
ENSG00000054803.4|CBLN4	0	0	0	0	0	0	0	0	0	0	0	0	0	0	0	0
ENSG00000054938.16|CHRDL2	0	0	0.133652	0	0	0	0	0	0	0	0	0	0	0	0	0
ENSG00000054965.11|FAM168A	16.6956	16.7645	20.8108	17.6231	19.3072	18.1042	17.9873	19.0384	16.6024	14.6265	13.0031	12.734	18.8825	20.2652	16.0777	20.0331
ENSG00000054967.13|RELT	15.7245	13.511	14.902	14.6026	25.0311	18.1167	23.4764	17.1722	9.13471	12.6484	7.62409	9.41304	11.7168	9.25269	15.9319	14.4691
ENSG00000054983.17|GALC	12.1377	10.9824	13.3748	14.8307	13.8869	14.5364	14.6194	15.9674	14.7214	16.0256	14.587	16.3793	19.4492	22.9706	20.9314	23.8488
ENSG00000055044.11|NOP58	61.8302	57.6975	57.3986	67.061	60.4794	63.3975	66.0407	58.804	69.1751	76.0233	74.1438	70.0401	56.0866	56.9531	56.3954	61.4239
ENSG00000055070.17|SZRD1	77.7815	75.3616	74.2278	68.1448	80.6843	77.5752	80.6945	75.4254	91.9883	78.9574	93.8394	84.3993	87.8727	85.6965	81.4655	88.7192
ENSG00000055118.17|KCNH2	0	0	1.35927	0	0	0.119661	0	0	0	0.045675	0	0.117026	0	0	0	0
ENSG00000055130.17|CUL1	34.8705	35.6165	30.608	40.1464	39.7199	38.09	38.5906	40.96	36.7913	38.1816	41.2622	39.7557	40.1877	42.7161	37.7732	41.6259
ENSG00000055147.19|FAM114A2	12.8207	15.426	11.5878	13.3589	15.7299	13.2235	14.8837	16.2217	12.0106	12.5496	12.2068	13.7397	12.5377	11.633	11.5496	14.9788
ENSG00000055163.20|CYFIP2	28.3095	26.8508	36.7709	35.0724	33.591	29.1	27.7	26.7114	16.3938	15.1283	15.3422	12.5591	15.017	15.7051	15.1194	19.9989
ENSG00000055208.19|TAB2	41.3376	33.0243	41.8131	44.7173	43.3347	42.5176	41.8702	42.541	28.5618	36.1865	30.2491	31.1119	38.3702	36.9673	35.9474	40.2281
ENSG00000055211.14|GINM1	92.8001	86.4528	78.0798	101.471	107.8	101.784	97.6418	102.751	52.9616	59.7111	54.8363	57.0447	54.2218	57.4869	50.5259	57.0524
ENSG00000055332.19|EIF2AK2	60.6725	55.6256	56.1703	63.5207	58.301	56.1791	54.04	56.6628	71.963	72.2654	76.805	70.8194	86.4295	87.0086	75.2246	85.7538
ENSG00000055483.19|USP36	43.9071	41.7931	56.201	44.9075	52.274	46.2519	54.1058	56.3089	43.1343	47.156	27.6668	33.3104	37.3769	32.0652	33.702	34.1135
ENSG00000055609.21|KMT2C	30.1362	24.5145	33.5262	33.3397	26.7403	24.9598	33.1701	33.5127	22.427	33.3333	14.8272	18.6128	30.174	32.0801	29.1644	33.1918
ENSG00000055732.13|MCOLN3	0.325351	0	0.219637	0.098151	0	0	0	0	0	0	0	0	0.089389	0	0	0
ENSG00000055813.6|CCDC85A	9.75415	9.14136	11.0201	11.0602	12.1956	13.661	9.73737	11.2493	13.1567	14.1848	14.1272	12.8647	17.4469	19.0555	14.63	19.5017
ENSG00000055917.16|PUM2	40.0529	36.4498	38.4797	45.043	44.8664	40.9	47.9153	47.8668	32.6925	34.6585	30.3098	32.9508	35.8284	39.7265	32.8308	37.465
ENSG00000055950.16|MRPL43	57.3431	63.107	58.3011	67.1843	59.0142	76.7674	71.2056	63.5932	67.326	83.7595	73.5938	82.1735	83.0789	69.0863	73.4857	83.2715
ENSG00000055955.17|ITIH4	0.848284	0.751167	0.774737	0.710608	0	1.87393	1.84395	1.88727	0	0.812342	0.214027	0.093249	0.83258	0.240104	1.67305	0.527046
ENSG00000055957.11|ITIH1	0	0	0.190018	0	0	0	0	0	0	0	0	0	0	0	0	0
ENSG00000056050.7|HPF1	22.1456	18.1047	21.755	24.2064	20.6115	22.0286	19.0904	21.2719	24.0012	27.9968	20.2894	25.702	23.0594	20.8699	25.2206	23.779
ENSG00000056097.16|ZFR	46.8814	50.4653	49.5132	51.0686	51.8438	50.6246	53.8047	55.8914	47.5671	45.1573	47.2086	44.2484	50.3623	49.5985	46.2864	45.3251
ENSG00000056277.16|ZNF280C	3.48934	4.65353	4.10706	6.36781	5.77297	4.71979	5.01523	4.58641	2.69847	2.86572	3.53905	2.7609	4.18677	3.13311	3.29104	3.31137
ENSG00000056291.19|NPFFR2	0.614675	0.563934	0.355792	0.499815	1.25607	1.15317	0.777826	1.02782	0.391735	0.361121	0.469634	0.588421	0.526976	0	0.839501	0.397057
ENSG00000056487.16|PHF21B	0	0	0	0	0	0	0	0	0	0	0	0	0	0	0	0
ENSG00000056558.11|TRAF1	12.9989	11.8751	12.9284	10.8917	12.9828	12.8568	15.4664	15.0435	12.4971	12.5861	10.577	11.3272	12.5507	13.653	11.0783	11.8997
ENSG00000056586.16|RC3H2	28.1529	29.5044	30.2317	32.5448	35.6147	32.7721	35.2504	34.4748	24.5366	24.0387	25.9082	22.5472	32.831	33.1592	29.6719	35.3263
ENSG00000056736.10|IL17RB	0	0	0	0	0	0	0.259485	0	0	0	0	0	0	0.242397	0	0
ENSG00000056972.20|TRAF3IP2	9.59138	7.73562	9.72846	8.39555	8.09994	8.10805	11.0153	9.25059	6.98627	7.85919	7.28737	6.16759	7.08906	5.99032	6.65451	5.717
ENSG00000056998.20|GYG2	0	0	0.041271	0	0	0	0	0	0	0	0.072359	0.031821	0	0.121829	0	0
ENSG00000057019.16|DCBLD2	187.942	179.808	195.105	206.583	209.594	215.106	196.611	207.607	247.384	273.258	245.576	234.63	303.585	294.582	300.318	369.951
ENSG00000057149.16|SERPINB3	0	0	0	0	0	0	0	0	0	0	0	0	0	0	0	0
ENSG00000057252.13|SOAT1	20.3794	19.545	19.7016	20.1201	21.8636	19.7734	22.1259	21.0794	19.9604	20.6415	20.1873	19.5185	20.7362	21.0333	19.2065	21.0209
ENSG00000057294.16|PKP2	5.6388	8.03753	9.11853	7.06722	8.58718	7.50003	7.77729	7.50375	4.69534	4.53702	5.37115	3.94865	4.54171	4.81498	4.45938	4.08569
ENSG00000057468.7|MSH4	0.740992	0.357354	0.490137	0.306848	0.199916	0.347265	0.844692	0.766765	0.084079	0.182906	0	0.034512	0.257243	0.191763	0.117885	0.333684
ENSG00000057593.14|F7	0	0	0	0	0	0	0	0	0	0	0	0	0	0	0.055259	0
ENSG00000057608.17|GDI2	223.263	220.477	213.638	220.55	203.22	221.544	233.133	218.971	292.86	294.224	329.505	291.832	295.748	288.589	281.21	299.276
ENSG00000057657.17|PRDM1	2.00299	1.4484	2.90733	2.171	2.49082	2.86448	2.4982	2.41283	0.273767	1.0179	0.45893	0.355701	0.601035	0.371672	0.348048	0.612284
ENSG00000057663.16|ATG5	21.9732	24.2065	20.5339	24.0699	24.5043	26.7273	27.4189	24.9774	17.1779	19.1291	19.7217	20.4795	19.4794	19.1279	18.5678	19.8025
ENSG00000057704.13|TMCC3	14.0048	11.3558	14.1103	16.3382	12.5108	12.184	14.1319	13.9892	7.70647	7.5312	8.21956	7.6811	7.80587	7.04144	5.80349	6.786
ENSG00000057757.10|PITHD1	43.7986	37.8848	47.2037	42.3817	44.4079	47.1345	48.4479	43.9773	33.9508	41.068	31.5941	40.3633	31.0043	30.0788	32.6808	30.8768
ENSG00000057935.14|MTA3	19.7725	20.6654	19.4601	24.094	23.6038	19.293	28.5886	21.4117	31.7552	27.8296	28.0686	26.6084	30.3069	23.4262	25.088	35.3966
ENSG00000058056.10|USP13	5.88756	5.76285	6.3518	6.4364	6.61236	8.65331	7.41346	7.59622	8.36728	10.4169	7.25491	7.04619	8.57421	7.06185	8.29851	10.937
ENSG00000058063.16|ATP11B	24.4662	25.5604	23.7357	30.3147	26.9345	26.7367	26.4951	28.8275	14.5928	15.3806	16.3453	14.3236	20.2943	18.9535	16.0812	22.5955
ENSG00000058085.15|LAMC2	5.60231	3.86034	5.99596	4.81898	7.85482	6.38657	6.64795	5.2132	51.7706	48.1233	49.1152	53.2008	55.4072	52.7897	45.5635	46.7922
ENSG00000058091.17|CDK14	4.30732	4.55416	4.91614	5.7387	3.1748	3.86878	5.58347	5.74292	8.35223	12.6382	9.23476	10.4484	12.6411	12.5801	11.9921	13.4666
ENSG00000058262.10|SEC61A1	212.934	202.575	217.317	208.82	237.041	220.993	228.459	226.635	242.632	225.192	252.308	235.505	237.009	257.622	236.443	254.905
ENSG00000058272.19|PPP1R12A	39.1046	36.2476	38.6921	43.0003	43.141	41.6507	42.3632	43.693	26.1535	27.8053	27.9293	25.9817	33.9899	34.2368	34.5746	39.4965
ENSG00000058335.16|RASGRF1	0.118756	0.053174	1.36369	0.523354	0.257112	0.097956	0.083752	0	0	0.062015	0.189761	0.17731	0.211938	0	0.081481	0.031969
ENSG00000058404.20|CAMK2B	12.5807	12.9922	10.6626	15.0453	14.3811	12.9637	11.2056	10.8991	0.256373	1.75636	1.1563	0.574559	1.0933	0.835789	0.530143	0.56495
ENSG00000058453.17|CROCC	17.1145	15.0917	17.4708	17.5743	18.3824	18.3253	19.0786	20.8644	8.63964	9.22742	6.51898	7.37768	6.67654	8.16053	6.61583	8.98465
ENSG00000058600.16|POLR3E	23.7	21.0701	19.2789	24.9884	21.0399	22.2453	24.6002	21.856	25.6698	25.9482	23.4695	20.683	15.4931	26.8091	17.4929	19.4198
ENSG00000058668.15|ATP2B4	78.5483	69.6596	89.0256	89.3721	92.8008	93.9293	101.427	89.4378	39.1246	38.2712	34.7002	33.2299	53.5929	54.3255	46.7497	62.5201
ENSG00000058673.17|ZC3H11A	35.4552	43.6796	57.1159	47.084	42.0795	58.6005	69.4137	38.7492	14.8193	25.8151	20.1139	34.4602	34.1721	44.9054	43.084	27.5865
ENSG00000058729.11|RIOK2	14.2491	12.3758	12.1184	15.3546	14.0207	14.1332	13.0603	13.7339	16.0526	18.1286	16.6057	15.8962	16.7993	15.0454	14.3514	16.0684
ENSG00000058799.15|YIPF1	29.6104	31.8776	22.0502	29.3871	22.9932	25.6329	19.5803	26.6	28.5938	27.6255	27.9109	30.7491	25.8149	28.0369	28.7045	31.0556
ENSG00000058804.12|NDC1	6.92481	6.90563	5.00596	5.66353	6.95593	5.53451	6.00937	6.88141	12.9943	12.4705	13.8028	13.1419	11.663	10.6453	7.69843	12.4862
ENSG00000058866.15|DGKG	0.556765	1.05935	0.496751	0.800444	0.468927	1.1898	1.84441	1.00779	0.236139	0.694747	0.636772	0.267496	0.463144	0.484925	0.166028	0.229381
ENSG00000059122.17|FLYWCH1	72.4939	69.1484	78.1709	77.9184	82.8103	80.2964	91.8107	83.6604	33.9258	41.2796	30.4669	33.6623	33.7086	37.1992	34.3665	38.3453
ENSG00000059145.19|UNKL	17.7368	14.8687	15.3706	18.771	16.5996	21.6833	24.8704	25.3379	8.86079	13.4078	6.25383	8.56381	8.26401	10.0365	9.09915	10.1251
ENSG00000059377.18|TBXAS1	13.9262	13.3668	12.528	11.2366	10.2345	15.8526	10.4837	12.7014	7.24253	10.1739	9.23308	8.41925	7.23809	7.39976	9.66643	8.65008
ENSG00000059378.13|PARP12	95.5511	87.4596	86.3295	92.7434	90.5793	87.3962	95.5818	84.3187	71.2496	86.3784	70.2099	75.1268	71.1958	81.8967	78.3716	77.334
ENSG00000059573.9|ALDH18A1	44.4	42.5431	37.9589	42.0729	46.7679	45.4699	45.1092	45.9374	55.1664	51.4407	54.9588	51.7684	52.771	51.7237	48.5649	52.1631
ENSG00000059588.10|TARBP1	16.7915	12.1017	21.7288	20.7952	23.1927	28.1529	29.9196	26.8114	11.5207	15.7437	10.8312	12.0692	12.0627	10.6793	12.3771	12.2785
ENSG00000059691.12|GATB	13.1317	11.925	17.2839	12.0859	13.5186	10.2401	16.4646	11.7777	22.4399	18.0691	20.7573	19.7469	17.4916	17.9064	16.6874	18.2199
ENSG00000059728.11|MXD1	11.1082	11.6068	9.85654	12.7942	12.8142	11.6012	15.2174	14.4984	5.45051	7.7224	5.06096	5.084	7.36153	6.11908	6.3236	6.90475
ENSG00000059758.8|CDK17	98.6707	97.9902	96.5232	111.215	112.858	102.032	99.4674	106.596	83.5967	108.999	85.9734	81.1912	85.8051	91.1843	97.327	107.597
ENSG00000059769.20|DNAJC25	12.4487	11.9407	10.0917	10.6318	13.5366	11.4524	12.9179	11.5928	6.41331	7.93866	7.43952	8.37876	7.2587	7.10467	8.17549	10.047
ENSG00000059804.16|SLC2A3	53.803	42.6655	40.3146	56.1956	54.6674	42.2111	45.386	47.9338	21.346	23.9132	26.1409	24.0585	57.8107	58.225	51.3567	59.6405
ENSG00000059915.17|PSD	1.28592	0.66351	0.206642	1.69449	1.71017	1.03122	0.912157	1.80561	0.510393	0.565226	0.124997	0	0	0	0.736804	0.660453
ENSG00000060069.18|CTDP1	36.7567	29.8548	31.4358	31.4277	36.7681	31.4139	33.3568	38.1177	21.2965	23.7406	21.3084	22.9203	25.0503	27.1256	25.9304	30.2927
ENSG00000060138.13|YBX3	622.682	554.41	672.276	590.737	611.211	562.199	616.837	621.521	531.599	522.704	549.693	505.766	510.854	520.619	458.879	514.382
ENSG00000060140.9|STYK1	11.3252	8.67832	10.2874	10.8512	13.3475	13.3881	9.43166	10.8061	7.27279	9.32967	7.8791	11.8113	7.36378	7.72766	8.82871	10.7885
ENSG00000060237.19|WNK1	60.6403	54.8463	78.5577	62.8855	80.372	61.0968	62.1948	61.6122	52.5796	69.8017	44.5576	42.5132	55.7411	80.7058	48.5853	55.8407
ENSG00000060303.5|RPS17P5	0	0	0.142723	0	0	0	0	0	0	0	0.039438	0	0	0	0	0
ENSG00000060339.14|CCAR1	50.8666	49.4851	54.0054	63.8029	50.9887	59.5433	61.0402	63.587	31.6191	35.3602	28.866	32.412	31.9419	32.701	37.9133	43.2201
ENSG00000060491.17|OGFR	90.8026	80.2335	77.7197	67.2389	81.6629	94.5153	95.2909	94.801	95.4655	91.1362	108.906	103.08	103.714	114.893	104.121	94.4062
ENSG00000060558.4|GNA15	0	0.130529	0	0	0	0	0	0	0.068102	0.354623	0.134274	0.206457	0	0.232629	0.135008	0
ENSG00000060566.14|CREB3L3	0	0	0	0	0	0	0	0	0	0	0	0	0	0	0	0
ENSG00000060642.11|PIGV	6.62388	7.5373	6.27431	7.43907	7.08115	8.7919	7.75823	4.59765	5.70117	6.20697	5.63171	5.46325	7.34845	5.43628	6.52824	6.46708
ENSG00000060656.20|PTPRU	14.7128	11.6256	16.6854	13.388	24.2488	15.8527	17.8637	17.555	9.98507	9.88101	8.53559	9.37017	11.6847	15.4872	12.944	15.106
ENSG00000060688.13|SNRNP40	34.81	31.9169	27.5324	37.2315	40.1616	37.6805	46.01	39.6299	45.9093	50.9753	43.3249	48.4846	36.9978	42.9431	42.7619	43.4768
ENSG00000060709.15|RIMBP2	0.291436	0	0	0.008909	0.023201	0	0.086102	0.015374	0	0	0	0	0	0	0	0
ENSG00000060718.22|COL11A1	0	0	0	0.034847	0	0	0	0	0	0.183566	0	0	0.045945	0.045494	0.219944	0
ENSG00000060749.16|QSER1	10.4823	10.5208	12.7523	12.6968	11.2053	12.3256	12.6885	12.9341	12.387	9.47722	13.842	10.1484	13.6326	12.437	11.2286	15.9268
ENSG00000060762.19|MPC1	21.4461	23.3809	23.4029	23.3615	18.7442	20.3771	22.3654	24.0023	23.7019	25.3345	25.0509	24.2067	24.8612	20.063	28.4653	18.2151
ENSG00000060971.19|ACAA1	40.8861	47.6989	61.5812	43.064	50.7357	58.605	53.5155	46.9437	41.6109	48.4418	52.1584	42.5265	40.6795	42.2168	41.4791	38.7877
ENSG00000060982.15|BCAT1	53.469	46.6356	48.2972	52.5445	57.1583	51.4321	59.1284	59.7864	50.9513	42.823	58.0962	44.678	70.2955	63.7393	60.8031	75.1277
ENSG00000061273.18|HDAC7	135.689	116.811	135.647	123.17	140.002	147.121	146.287	141.011	88.0813	96.7645	75.3002	80.5859	87.4408	100.045	92.8227	100.992
ENSG00000061337.15|LZTS1	0	0	0	0	0	0	0	0	0.054528	0	0	0	0	0	0	0
ENSG00000061455.11|PRDM6	0	0.015271	0	0	0.063811	0.027511	0	0.013777	0.058011	0.035741	0.122628	0.065663	0.171871	0.072432	0.184645	0.063037
ENSG00000061492.12|WNT8A	0	0	0	0	0	0	0	0	0	0	0	0	0	0	0	0
ENSG00000061656.11|SPAG4	15.0146	13.5949	11.1604	13.7313	17.5599	12.9119	10.8518	11.2653	4.76714	6.05232	5.33779	4.34823	9.71523	10.3149	9.28874	11.4323
ENSG00000061676.15|NCKAP1	40.3601	57.7846	32.4856	43.9284	39.7308	40.7365	33.6378	46.573	29.7156	36.8138	30.8075	32.1697	39.3668	42.5706	33.3672	52.7407
ENSG00000061794.13|MRPS35	41.1476	41.7511	37.7287	44.9734	32.1606	42.4201	43.477	44.4925	55.2735	59.4488	55.729	50.626	52.6313	57.6012	48.5386	53.7464
ENSG00000061918.14|GUCY1B1	0	0	0	0	0	0	0	0	0.247972	0	0	0	0	0	0.125522	0
ENSG00000061936.10|SFSWAP	32.1069	27.9477	28.7174	34.0375	31.3526	34.5166	38.3136	35.2736	26.818	30.0288	18.1042	23.5091	20.5574	25.8315	24.805	27.0613
ENSG00000061938.21|TNK2	40.8107	29.5876	34.7408	33.2007	41.1743	38.3472	40.9904	39.5854	20.736	29.3959	16.8273	21.1215	19.0618	23.3894	29.6266	30.468
ENSG00000061987.16|MON2	12.7671	13.8664	18.9521	17.899	25.0289	20.5568	16.1828	19.6201	12.5622	16.6137	11.235	8.5924	17.9446	14.4998	11.4962	13.8353
ENSG00000062038.15|CDH3	0	0.025643	0.643969	0.01967	0.241563	0	0.056943	0.027744	0	0	0	0	0	0	0	0.462438
ENSG00000062096.15|ARSF	0	0	0	0	0	0	0	0	0	0	0	0	0	0	0	0
ENSG00000062194.16|GPBP1	42.4398	39.9955	55.3493	44.9818	64.4429	42.2766	52.551	45.7836	34.2668	33.9378	27.7056	26.3563	40.2471	31.1422	36.5829	35.7829
ENSG00000062282.15|DGAT2	0.803845	2.78893	0.288187	1.69754	2.66782	0.405434	1.17117	1.91901	1.07446	0.90666	1.12731	1.27369	1.37153	0.441658	0.313566	0.102199
ENSG00000062370.17|ZNF112	6.01761	6.76467	6.60262	6.70689	5.56872	6.2335	8.61524	6.76152	3.55886	2.60237	3.58355	2.95059	4.30197	3.68603	4.34886	4.18062
ENSG00000062485.19|CS	131.915	125.246	138.929	139.323	134.115	126.996	138.38	134.863	165.275	171.699	179.881	161.489	173.208	178.901	166.283	176.581
ENSG00000062524.16|LTK	0.104846	0.075148	0.257646	0.147531	0	0.494778	0.430122	0.102677	0	0.181757	0.108363	0	0.04851	0.287486	0	0.308396
ENSG00000062582.14|MRPS24	80.2044	79.2659	72.7305	78.1678	85.4099	98.9594	84.6151	78.2479	134.852	113.46	116.533	140.354	114.35	117.911	119.166	99.5387
ENSG00000062598.18|ELMO2	31.8554	29.3747	31.9444	30.1367	35.4063	31.492	40.2055	32.0865	24.9612	24.1797	22.4479	23.0744	26.0323	25.8665	20.5903	26.285
ENSG00000062650.20|WAPL	28.09	26.5056	25.8204	27.3309	29.7897	26.3242	28.527	27.0094	25.0942	23.1125	24.1798	21.5216	25.9665	25.421	23.821	25.2031
ENSG00000062716.13|VMP1	98.15	93.9359	90.1871	108.499	101.03	109.111	101.998	102.282	63.8143	99.6322	55.2312	70.29	82.0311	82.2403	99.4641	103.887
ENSG00000062725.10|APPBP2	17.6173	17.7812	17.0523	20.8649	18.5436	19.6896	20.0098	21.2053	11.4283	12.2321	10.9659	11.4929	13.3507	13.315	13.1822	16.1477
ENSG00000062822.15|POLD1	15.6126	11.3146	12.7345	15.9693	16.2791	18.8934	20.5493	17.0045	26.1017	28.4011	25.7754	24.6471	20.7214	24.9056	18.8765	22.936
ENSG00000063015.20|SEZ6	0	0	0	0	0	0	0	0	0	0	0	0	0	0	0	0
ENSG00000063046.18|EIF4B	247.409	219.218	270.429	273.796	306.129	243.56	273.625	264.857	276.564	230.281	296.6	260.719	285.511	282.593	265.607	295.734
ENSG00000063127.16|SLC6A16	5.91875	4.70623	3.48342	4.73392	4.05318	3.09681	5.35542	3.61818	1.35038	1.2545	0.47406	1.57114	1.69846	1.66988	2.69892	1.38108
ENSG00000063169.11|BICRA	14.3954	11.9172	26.2519	12.5809	13.6084	19.6197	23.408	20.6281	13.0253	12.2957	9.2083	10.0976	8.64409	10.8508	10.2657	12.9202
ENSG00000063176.16|SPHK2	20.6379	24.4353	19.3293	22.2289	20.276	21.5779	22.3241	19.0198	14.1102	16.4748	14.2787	13.3581	11.5822	15.5334	16.0404	14.1867
ENSG00000063177.13|RPL18	810.016	838.681	957.81	971.025	951.934	896.845	839.114	861.727	1485.53	1384.1	1815.93	1513.2	1281.45	1267.54	1227.52	1352.56
ENSG00000063180.9|CA11	5.62036	5.58166	6.79885	7.67016	6.75019	9.92579	9.29372	9.042	4.21016	3.34158	3.57072	4.87047	3.10882	5.59152	5.63542	4.36567
ENSG00000063241.8|ISOC2	47.0452	39.4416	35.2706	33.0847	41.7321	39.0867	41.8566	42.7899	36.8272	41.0626	45.4279	42.8111	45.8044	37.0769	31.198	35.5516
ENSG00000063244.13|U2AF2	133.851	133.414	126.689	133.286	137.177	144.942	172.843	155.742	161.856	153.704	134.894	147.871	126.701	142.776	144.508	141.011
ENSG00000063245.15|EPN1	77.6192	86.5586	84.8424	67.6344	88.0811	81.2023	93.3291	86.3756	88.0088	61.9165	92.7912	62.6358	72.5326	77.4283	72.0182	77.9454
ENSG00000063322.15|MED29	21.9459	25.5795	27.4607	22.8208	25.5383	25.919	23.3253	24.176	19.9816	17.6143	16.8522	18.0549	17.8074	17.5726	15.4634	19.9841
ENSG00000063438.20|AHRR	6.23177	10.653	13.5999	11.055	8.84808	11.0818	12.9049	12.5467	6.32905	9.5599	5.72905	5.74818	7.41485	6.40977	6.94421	8.91056
ENSG00000063515.3|GSC2	0	0	0	0	0	0	0	0	0	0	0	0	0	0	0	0
ENSG00000063587.15|ZNF275	5.9837	5.59655	7.66631	6.8429	7.04814	6.34921	6.6584	6.80411	5.36933	3.02713	4.89119	4.44962	6.38015	7.2961	6.0883	8.59117
ENSG00000063601.17|MTMR1	20.0242	18.7796	20.1834	21.7488	25.3228	22.3529	20.598	20.6485	18.9685	22.951	20.2019	20.5022	24.9016	24.6942	19.6929	26.1606
ENSG00000063660.9|GPC1	80.2316	68.1738	87.078	77.8531	88.3806	84.5275	80.7766	79.9968	46.6434	49.015	44.3911	47.1005	44.4753	50.2989	46.6173	51.6923
ENSG00000063761.16|ADCK1	7.43186	7.85466	5.50565	7.24372	7.84693	4.47639	8.01421	7.77529	4.5098	5.05975	4.38664	4.86592	3.54448	4.62099	4.56772	2.86764
ENSG00000063854.13|HAGH	97.5449	85.1816	79.9501	91.2217	111.055	101.06	94.48	93.1659	46.2859	57.7523	39.937	56.4753	42.4197	65.3638	64.3362	61.4379
ENSG00000063978.16|RNF4	52.1804	46.9685	46.886	49.9066	51.2268	51.9826	49.7729	53.1029	52.8779	58.6823	50.745	53.4725	61.8114	62.6939	52.5285	71.4707
ENSG00000064012.22|CASP8	12.6676	14.2822	11.7897	13.1059	13.9534	12.0233	15.4006	16.8842	17.0113	17.5211	16.4259	16.0999	16.4774	15.8352	13.5998	13.9357
ENSG00000064042.18|LIMCH1	31.9932	28.1957	36.3285	32.1084	38.7557	34.9993	36.0529	34.4822	6.52859	6.40034	7.3819	6.61555	11.8387	12.4636	10.9854	12.1867
ENSG00000064102.15|INTS13	24.7983	20.216	23.9183	27.9945	28.7424	22.8676	24.0732	25.6245	30.7773	34.0961	32.9239	32.8966	30.8771	32.9562	33.128	38.0457
ENSG00000064115.11|TM7SF3	55.536	48.1928	57.2936	60.7166	53.1036	59.0851	57.8215	59.7937	44.5238	49.2219	40.7265	42.1782	45.637	49.4787	46.0524	54.6957
ENSG00000064195.7|DLX3	0	0	0	0	0	0	0.53465	0	0	0.212974	0	0	0	0	0	0
ENSG00000064199.7|SPA17	3.04547	2.7159	3.13628	3.45459	2.34979	2.54083	1.55829	3.86289	4.53049	5.65534	4.86856	4.95294	5.43483	4.76409	4.46207	4.41446
ENSG00000064201.16|TSPAN32	0	0	0	0	0	0	0	0	0	0.065118	0	0	0	0	0	0
ENSG00000064205.11|CCN5	0	0	0	0	0	0	0	0	0	0	0	0	0.073248	0	0	0
ENSG00000064218.5|DMRT3	0	0	0	0	0	0	0	0	0	0	0	0	0	0	0.069256	0
ENSG00000064225.12|ST3GAL6	68.2484	74.0719	77.585	90.1137	77.7492	85.6185	96.871	83.2725	33.8849	47.0271	31.0995	38.7055	33.7348	41.7552	46.2879	56.2273
ENSG00000064270.13|ATP2C2	0	0.107217	0	0	0	0	0	0	0	0	0.046939	0	0	0	0	0
ENSG00000064300.9|NGFR	0.252062	0.140025	0.528058	0.283908	0.772637	0.712288	0.930813	0.586145	0.091296	0	0.09184	0.032159	0.031865	0.048904	0.145214	0.177417
ENSG00000064309.16|CDON	0.552952	0.515342	1.19692	0.690893	0.457979	0.603451	0.660963	0.633486	0.672531	0.358023	0.636781	0.391158	0.58463	0.845068	0.591599	1.3794
ENSG00000064313.12|TAF2	16.2257	15.0182	15.9085	16.8091	18.0469	17.905	15.2254	17.4092	16.8957	21.3757	18.3201	15.0905	19.8923	21.1072	17.8474	20.4018
ENSG00000064393.16|HIPK2	21.5155	20.3931	23.9683	26.0016	20.4234	20.2163	19.3468	22.1939	24.6275	19.5512	18.5524	16.5755	25.7319	27.8449	21.326	26.1959
ENSG00000064419.14|TNPO3	41.8002	41.8032	43.9431	43.8203	39.8766	41.2362	43.3745	43.5698	42.9349	39.5237	43.9082	36.3998	47.7166	47.2657	39.3764	47.3798
ENSG00000064489.23|BORCS8-MEF2B	6.66884	10.5289	8.24506	5.03769	8.63486	4.04881	7.043	7.92368	4.64587	5.18056	4.98332	4.30231	3.5643	6.1352	5.11508	0.468726
ENSG00000064490.14|RFXANK	44.204	42.9268	50.3194	40.6447	52.5357	50.1371	55.6517	45.4154	60.1867	57.621	66.8359	61.1401	57.8989	56.0502	61.2877	54.8836
ENSG00000064545.15|TMEM161A	32.4023	26.0084	27.334	29.2844	25.8204	22.6249	29.6593	26.9385	24.6145	26.4659	20.2371	23.7468	22.2081	24.2852	23.9201	28.1352
ENSG00000064547.14|LPAR2	9.59136	5.06197	9.44061	8.45198	11.2792	10.9039	15.302	11.5776	1.6334	1.91331	1.03301	0.93967	1.55864	2.72954	0.960484	1.94822
ENSG00000064601.21|CTSA	295.728	283.54	303.404	314.873	332.702	315.897	323.284	318.648	227.809	272.928	212.674	260.191	220.22	256.843	266.106	282.221
ENSG00000064607.17|SUGP2	50.1137	38.2495	47.3063	57.8504	53.2952	55.1484	67.4293	60.6665	25.6483	39.4286	17.805	26.307	26.6066	29.9278	30.8096	33.0198
ENSG00000064651.14|SLC12A2	119.013	100.595	96.3006	115.299	144.04	133.053	143.12	152.69	25.0026	29.3032	24.9415	24.4491	29.9082	27.5865	24.8196	29.4865
ENSG00000064652.11|SNX24	9.11291	8.05022	9.20805	10.0647	7.73246	12.2203	11.5734	10.0106	11.9587	8.941	8.1059	11.6362	10.7609	10.8635	9.30406	10.0815
ENSG00000064655.19|EYA2	0.537267	0.049406	0	0.031114	0	0.09843	0	0	0	0	0	0.085657	0	0	0	0
ENSG00000064666.15|CNN2	186.02	173.452	211.756	165.641	203.14	191.468	218.603	178.334	167.89	163.496	179.041	179.403	197.911	211.437	221.923	218.527
ENSG00000064687.13|ABCA7	17.2578	11.6144	17.2616	16.8256	17.0011	17.7021	17.8669	19.5153	2.68175	4.37657	1.23193	2.36889	1.73986	2.89345	4.59031	3.77772
ENSG00000064692.20|SNCAIP	5.82932	4.04286	2.92315	4.549	5.90081	4.28468	5.13357	5.32089	0.244235	0.050949	0.242338	0.27509	0.564351	0.180704	0.252666	0.111831
ENSG00000064703.13|DDX20	18.0175	14.8891	11.3778	19.6895	17.9856	15.7948	19.5025	16.3991	19.0752	16.2769	13.9627	15.0625	15.468	17.6923	14.5596	18.7082
ENSG00000064726.10|BTBD1	67.5761	71.1893	60.9224	77.6803	83.7591	70.7868	76.5774	71.9698	58.8275	59.5934	61.7309	57.3431	64.9647	62.6619	62.8619	69.555
ENSG00000064763.11|FAR2	26.2012	25.948	23.2324	26.0592	22.3342	26.822	28.0638	26.3942	19.9457	23.499	21.4341	20.9137	21.7593	22.2839	21.8349	23.3079
ENSG00000064787.13|BCAS1	0	0	0	0	0.143964	0.073521	0	0	0	0.122058	0.01707	0	0	0	0.028249	0
ENSG00000064835.12|POU1F1	0	0	0	0	0	0	0	0	0	0	0	0	0	0	0	0
ENSG00000064886.14|CHI3L2	0	0	0.454163	0	0.134552	0.40926	0.747576	0	0	0	0	0	0	0	0	0
ENSG00000064932.16|SBNO2	74.0381	62.6445	72.2791	61.6564	79.8067	84.0088	80.9548	83.1668	52.6492	67.5235	51.5823	55.6569	61.9875	69.3817	72.148	79.5653
ENSG00000064933.18|PMS1	14.2047	15.2559	11.5486	16.184	17.2505	14.5574	15.3085	14.4039	10.6303	15.1945	10.502	11.1875	7.98792	9.18188	10.2686	13.5475
ENSG00000064961.19|HMG20B	81.775	59.4168	73.9223	83.8208	84.3283	86.4163	76.8909	85.4644	68.2943	68.7266	75.4097	71.5117	63.7219	75.7587	66.1338	66.2216
ENSG00000064989.13|CALCRL	98.7256	99.3871	104.487	106.118	110.261	120.69	104.435	115.08	59.7913	60.0712	63.6887	58.3499	65.6669	65.7687	64.324	76.6433
ENSG00000064995.18|TAF11	27.217	21.9024	19.5027	29.5322	29.1348	22.825	30.4566	27.48	27.3842	32.3944	27.3061	27.3033	23.5443	24.4695	28.1011	27.5378
ENSG00000064999.15|ANKS1A	12.6059	12.1482	13.0251	11.6966	16.0572	13.4225	15.1527	14.4044	9.86229	9.62553	8.01069	10.423	10.5625	10.7928	9.16509	11.103
ENSG00000065000.19|AP3D1	132.988	112.085	136.504	120.767	125.336	126.559	142.274	130.12	130.948	142.573	121.95	135.752	135.993	146.922	131.24	148.7
ENSG00000065029.15|ZNF76	27.6602	27.7688	30.8232	27.1968	27.4736	29.7168	32.3885	32.0146	11.0459	16.2459	13.9861	12.9186	12.5645	13.7646	14.3949	15.1725
ENSG00000065054.14|SLC9A3R2	143.376	113.314	129.86	104.773	101.355	118.714	115.378	115.17	119.109	131.051	136.985	126.238	120.263	136.374	112.54	113.196
ENSG00000065057.9|NTHL1	26.3658	18.9927	15.1339	18.0697	15.6028	26.5429	20.5889	23.7368	24.7034	27.2187	25.6201	21.9886	17.4287	21.2153	24.6889	20.4328
ENSG00000065060.17|UHRF1BP1	8.86665	7.9017	8.39144	10.769	9.76847	9.8732	8.2112	8.20247	8.78821	8.35113	8.33198	6.95486	9.6036	10.4904	7.31741	8.73565
ENSG00000065135.12|GNAI3	23.6003	22.0527	21.4653	22.9133	23.9838	23.5236	25.0792	22.3391	27.2748	28.5508	29.6749	30.1387	31.8693	33.207	32.1917	32.8808
ENSG00000065150.21|IPO5	74.7753	66.9693	68.309	79.5512	68.8074	76.0772	79.1543	78.9752	121.5	121.035	129.103	116.022	132.73	133.013	109.629	131.319
ENSG00000065154.12|OAT	96.2304	88.7936	99.4857	104.087	94.2867	104.686	104.402	106.969	96.0392	99.7695	106.689	105.644	122.618	110.976	107.144	114.221
ENSG00000065183.16|WDR3	5.97499	6.42688	8.43351	6.2152	6.73438	7.80931	8.69503	8.27463	13.0177	10.9484	12.7594	11.4279	11.0436	10.9851	8.54037	9.54533
ENSG00000065243.20|PKN2	35.9511	29.2792	27.6078	38.1601	36.1269	37.2493	36.7015	35.0382	23.7929	24.2852	25.2655	19.0322	25.8533	31.0455	26.2343	33.9506
ENSG00000065268.11|WDR18	38.8678	46.1505	45.2426	41.0606	38.2007	49.2868	46.6505	46.809	64.2208	63.0342	63.0462	59.7695	50.2804	57.5717	52.1542	58.4757
ENSG00000065308.5|TRAM2	86.913	84.0842	99.3152	94.5206	102.327	95.9841	107.924	97.7909	122.52	108.75	101.397	106.86	118.522	124.818	102.013	112.302
ENSG00000065320.9|NTN1	0.03052	0.172233	0.27296	0.419914	0.224756	0.485764	0.141485	0.039802	0.098036	0.186584	0.083676	0.168588	0.267514	0.130117	0.108234	0.191314
ENSG00000065325.13|GLP2R	0	0	0	0	0	0	0	0	0	0	0	0	0	0	0	0
ENSG00000065328.17|MCM10	0.092934	0.72325	0.179995	0.136856	0	0.386941	0.536594	0.117487	6.67368	7.35149	6.94435	8.36036	3.98475	4.42985	2.62735	2.73509
ENSG00000065357.20|DGKA	55.142	52.7425	70.6864	67.5015	66.9516	59.929	70.247	65.9728	38.0659	46.8691	33.725	33.1472	31.6371	34.1155	39.505	41.7923
ENSG00000065361.17|ERBB3	0	0	0.068172	0.226864	0	0	0.076113	0	0	0	0	0	0	0	0	0
ENSG00000065371.17|ROPN1	0	0	0	0	0	0	0	0	0	0.104267	0	0	0	0	0	0
ENSG00000065413.20|ANKRD44	8.0878	5.9418	6.70592	10.5876	9.30786	8.4365	9.25744	8.51704	1.21193	2.02724	1.50954	1.28741	1.66586	2.07511	1.71474	2.2471
ENSG00000065427.15|KARS1	98.7237	102.151	93.7443	97.3987	99.8782	97.1999	99.4853	97.662	190.764	173.21	203.255	183.282	181.876	184.4	155.233	176.21
ENSG00000065457.11|ADAT1	11.3175	10.8841	10.4074	13.4205	12.6722	13.0848	14.7813	11.0847	10.014	8.09325	7.96871	7.10311	8.65863	8.11358	7.60647	8.15016
ENSG00000065485.20|PDIA5	86.2489	81.2206	88.0587	91.056	95.6963	108.838	99.9425	90.0139	48.5497	60.1262	47.5263	62.7459	57.7412	60.3709	59.5117	66.0812
ENSG00000065491.8|TBC1D22B	21.3032	20.5901	25.872	22.058	18.8144	21.832	20.7998	20.3563	14.6915	16.3088	14.665	14.9062	16.9051	17.5653	15.1747	16.9603
ENSG00000065518.8|NDUFB4	157.097	182.304	174.998	181.712	192.489	167.023	184.191	144.766	204.273	208.77	172.012	200.93	184.137	180.957	199.786	169.656
ENSG00000065526.12|SPEN	30.8712	28.4832	30.502	33.3234	29.8728	29.0729	31.1761	32.8083	32.9965	27.8016	25.9555	24.5217	35.1727	38.7739	31.4078	36.9637
ENSG00000065534.19|MYLK	13.383	13.4566	11.678	11.4012	13.2148	11.6338	16.3255	18.3171	11.8567	9.11996	16.1635	14.3116	13.4987	14.4948	10.5409	13.6898
ENSG00000065548.18|ZC3H15	67.6823	69.3154	71.1689	67.6002	65.8009	69.1234	76.933	69.0379	58.2373	66.7517	65.8426	68.1133	57.2838	60.1849	64.8798	62.2314
ENSG00000065559.15|MAP2K4	17.8055	15.3506	19.8002	21.983	19.7577	19.5341	20.1418	19.254	11.3338	12.9208	11.9794	11.012	11.9875	13.3323	11.9949	11.8646
ENSG00000065600.13|PACC1	23.589	28.2939	25.9121	23.543	27.495	27.8311	29.5255	25.6887	12.7416	14.8442	11.6406	12.0809	14.1237	15.9437	14.3688	14.1233
ENSG00000065609.14|SNAP91	0	0.062892	0	0	0	0.066237	0.112149	0.068371	0.060336	0	0.126406	0	0.101068	0.125249	0.136151	0
ENSG00000065613.15|SLK	35.8639	29.0788	33.6374	35.0842	39.4541	37.3897	36.4003	37.561	23.6237	24.3016	28.8969	24.8286	28.3981	27.4258	25.4293	32.3694
ENSG00000065615.14|CYB5R4	2.15512	3.43032	2.56596	3.26314	3.21605	3.40162	2.94699	3.63688	2.47732	2.68992	2.41747	2.99505	2.4394	2.4826	2.48076	4.05427
ENSG00000065618.21|COL17A1	1.5587	0.915243	0.59132	0.9611	0.991792	1.22525	1.58266	0.870034	0.473719	0.361246	0.584513	0.763985	0.603727	1.15603	0.217084	0.381711
ENSG00000065621.15|GSTO2	1.95979	3.06951	3.18968	2.50627	1.4059	2.30903	2.99905	2.27196	2.28258	4.84521	1.88583	1.88862	2.06392	1.86086	2.40196	2.27182
ENSG00000065665.21|SEC61A2	11.192	10.6391	11.0824	13.1067	13.8349	14.8363	17.0903	10.5331	6.22671	7.34359	4.0027	4.63051	4.59047	5.18145	8.67308	6.42335
ENSG00000065675.15|PRKCQ	1.03649	0.324363	1.47846	0.587821	1.67484	0.818454	0.454515	0.669942	1.04128	0.772868	0.508531	0.798259	0.668526	0.383011	0.197994	0.600631
ENSG00000065717.15|TLE2	21.3344	19.3356	26.1533	19.8099	24.5268	23.2203	24.5312	24.5168	15.7615	17.7497	15.4391	15.9969	14.4749	17.9708	18.7424	17.2421
ENSG00000065802.12|ASB1	18.3278	15.4385	21.2437	19.5152	18.9424	19.7081	29.2569	17.3573	15.0005	15.5335	14.3885	14.324	18.9683	16.4664	18.0227	18.387
ENSG00000065809.14|FAM107B	79.5231	75.7031	92.27	94.2765	91.6974	86.1322	82.5619	88.1625	155.356	164.137	165.977	173.445	219.001	218.205	214.769	230.152
ENSG00000065833.9|ME1	22.6983	22.6898	21.8182	23.3379	23.1513	23.0559	23.6207	21.9044	19.2532	19.4215	19.8924	18.3711	18.0148	19.0604	19.7892	20.7783
ENSG00000065882.16|TBC1D1	36.1833	32.3383	37.5487	32.5933	37.2757	30.4846	30.3604	33.5073	44.0007	37.1416	53.3112	37.2227	50.5413	51.1965	36.3978	48.5968
ENSG00000065883.16|CDK13	38.9722	34.0713	34.8896	40.9573	36.5636	39.6371	37.7671	41.3508	28.4025	38.1174	21.168	24.7306	29.6634	30.3259	33.329	35.4616
ENSG00000065911.13|MTHFD2	60.7207	59.8225	60.3408	58.7701	52.0333	53.5217	63.5605	54.8273	45.5487	46.0383	40.9188	37.0609	43.9384	42.4253	36.0547	39.7095
ENSG00000065923.10|SLC9A7	7.8652	8.10736	9.23541	10.456	10.8806	9.63621	10.5187	9.39505	7.87128	7.56181	8.3163	7.55411	9.04706	9.72995	7.9659	10.7765
ENSG00000065970.9|FOXJ2	13.2627	11.7562	14.3414	14.0643	12.6208	12.5228	14.8548	13.3998	13.1866	9.7299	13.0199	10.6564	12.6996	13.503	11.7814	12.5589
ENSG00000065978.19|YBX1	436.066	416.646	449.99	405.457	424.52	417.111	440.092	393.808	655.898	509.727	662.056	552.737	560.034	607.011	537.008	595.941
ENSG00000065989.16|PDE4A	18.6333	18.0775	13.645	19.2831	18.8454	18.8142	19.1873	20.1743	17.9283	18.9541	16.6019	15.0652	19.4229	20.3237	16.4919	24.4677
ENSG00000066027.12|PPP2R5A	18.0846	17.188	16.5602	18.4831	15.9426	18.7233	18.5225	17.4967	12.2761	15.8776	14.1984	13.2494	13.1106	13.4697	12.6782	14.6368
ENSG00000066032.19|CTNNA2	0	0	0	0	0	0	0	0	0	0.039681	0	0	0	0	0	0
ENSG00000066044.15|ELAVL1	28.6027	24.2115	28.74	26.5683	35.4101	27.2562	31.8187	31.6299	35.839	37.796	34.9458	34.9072	33.1568	39.844	33.2762	37.4534
ENSG00000066056.14|TIE1	324.939	307.675	327.694	322.986	349.865	356.285	368.082	349.613	164.034	183.889	154.215	172.584	158.229	166.782	163.791	188.038
ENSG00000066084.13|DIP2B	23.6585	21.19	21.4311	21.805	22.2996	20.7485	24.5496	25.6074	18.825	17.5389	19.3151	15.174	23.5787	22.6041	20.0165	25.8148
ENSG00000066117.15|SMARCD1	46.4104	50.3914	53.2531	50.6749	53.1584	50.9544	56.4432	56.6762	53.8125	55.0723	51.832	47.4783	51.5119	44.6386	40.1277	47.6989
ENSG00000066135.13|KDM4A	33.2336	33.4528	36.3825	34.859	35.0014	39.9877	37.7697	34.1092	25.2419	27.469	21.1365	22.7707	24.7131	25.7858	23.4863	27.6871
ENSG00000066136.20|NFYC	26.1739	27.1506	27.7414	25.7082	23.7469	26.613	25.3902	27.7264	33.3479	28.4221	27.3739	30.883	27.6906	26.453	22.5281	30.6461
ENSG00000066185.13|ZMYND12	0.152187	0.594822	0.72727	1.43455	1.01202	1.23727	0.257609	0.736808	1.77973	0.722094	0.982473	0.627132	1.08629	0.76695	0.875962	0.657554
ENSG00000066230.12|SLC9A3	0.675216	1.85255	2.97116	2.6374	3.8443	0.609184	3.13357	3.62146	2.2513	1.72111	2.47266	3.07839	2.93356	1.23423	2.92271	2.73332
ENSG00000066248.15|NGEF	0	0	0	0.081196	0	0	0.398318	0	0.417964	0.396566	0.980113	0.545289	0.642243	0.40736	0.689412	0.370993
ENSG00000066279.19|ASPM	0	0.148722	0.176731	0.050397	0.31659	0.137288	0.089147	0.045475	3.01075	3.86099	4.17988	3.17741	3.25243	1.63484	1.29629	2.32169
ENSG00000066294.15|CD84	0	0	0	0.05384	0	0	0	0	0	0.025608	0	0	0	0	0	0
ENSG00000066322.15|ELOVL1	147.613	149.847	122.667	130.703	121.284	136.456	154.581	144.134	152.346	158.91	161.068	161.352	155.719	159.811	149.926	156.277
ENSG00000066336.12|SPI1	0	0.225003	0.107466	0.166733	0	0	0	0	0	0	0.151108	0	0	0	0	0
ENSG00000066379.15|POLR1H	16.2425	14.031	17.654	15.9845	17.5566	17.6706	16.1947	18.1718	23.0024	23.6161	22.3997	22.7234	22.1104	16.9593	18.048	18.4181
ENSG00000066382.17|MPPED2	0	0	0	0	0	0	0	0	0	0.200886	0	0	0	0	0	0
ENSG00000066405.13|CLDN18	0	0	0.203285	0	0.158924	0	0	0	0	0	0	0	0	0	0	0
ENSG00000066422.5|ZBTB11	17.0695	14.7006	13.4475	15.6063	16.4908	14.987	16.3989	17.4275	12.2058	13.7712	11.0594	11.0165	12.5842	12.482	11.2318	13.1515
ENSG00000066427.24|ATXN3	12.8264	11.1695	16.7942	14.2694	13.9848	13.6747	14.9689	12.5501	6.64927	13.7088	6.35481	7.69787	8.81099	10.1235	8.60429	11.0294
ENSG00000066455.13|GOLGA5	34.0888	32.4537	31.4582	32.8556	33.2978	36.3318	36.4713	33.8341	28.5457	28.2098	33.7314	29.0845	31.5226	32.9368	30.8443	35.8331
ENSG00000066468.24|FGFR2	0.031298	0	0.054949	0.052865	0.046431	0	0	0.145748	0.098976	0	0.039577	0	0.144703	0.026253	0.173062	0
ENSG00000066557.6|LRRC40	10.4519	9.22213	14.0989	11.8832	12.9722	12.3582	13.9649	16.0798	14.8423	17.0184	15.4822	13.4049	14.0873	14.8982	15.2278	17.2675
ENSG00000066583.12|ISOC1	9.66621	10.6948	11.0999	14.3092	12.5524	12.7395	15.8118	14.8714	16.3838	16.5627	14.8834	17.935	15.2774	15.6919	14.8154	16.3004
ENSG00000066629.18|EML1	15.9012	14.8376	17.42	16.1919	17.0677	16.7042	15.486	19.5457	22.0419	23.3762	26.422	23.1285	34.0572	32.3928	33.5967	38.7196
ENSG00000066651.20|TRMT11	10.5852	10.4961	4.52766	10.0183	9.1586	8.73847	10.2915	7.57267	5.63499	7.80827	5.44623	5.39671	6.28857	6.05837	8.16612	7.59659
ENSG00000066654.14|THUMPD1	21.13	21.8066	24.1375	24.3432	23.8313	21.6033	26.8844	25.5526	19.0932	16.3664	18.1105	18.3286	17.6118	18.5554	17.2315	19.8039
ENSG00000066697.15|MSANTD3	87.1228	92.1933	82.3876	96.6677	102.55	92.2152	96.7494	96.3395	87.5553	101.782	98.2272	101.328	101.132	113.382	111.024	117.149
ENSG00000066735.15|KIF26A	2.29391	2.31248	2.08289	1.48225	1.70746	2.05106	2.34308	2.47118	4.45157	4.08709	3.51047	3.52016	3.71205	4.31892	3.58035	3.84408
ENSG00000066739.12|ATG2B	10.4795	9.80171	13.4478	12.0711	14.989	12.4687	12.4746	12.0774	7.24209	6.6224	5.87518	5.67194	7.36471	6.93203	6.77874	7.68124
ENSG00000066777.9|ARFGEF1	29.6461	29.0718	32.7185	35.5649	36.1082	31.215	32.9741	32.2418	21.3041	22.052	22.1678	22.449	28.4253	27.1914	25.2357	33.6705
ENSG00000066813.14|ACSM2B	0	0	0	0	0	0	0	0.52017	0	0	0	0	0	0	0	0
ENSG00000066827.16|ZFAT	4.6952	6.43975	6.37113	5.32873	4.46856	5.68986	7.26524	6.64498	6.37393	4.96612	5.50732	5.70841	7.07067	7.15754	5.03664	7.23525
ENSG00000066855.16|MTFR1	15.1045	13.8985	17.9409	15.888	21.5506	18.5349	16.652	19.031	16.4324	19.0948	20.3521	18.5158	22.275	17.9285	19.9958	20.3242
ENSG00000066923.18|STAG3	0.330487	0.492143	0.256419	0.703235	0.752618	0.925321	1.36753	0.898091	0.235004	0.93935	0	0.482481	0.475451	0.09132	0.353447	0.264805
ENSG00000066926.13|FECH	8.65497	12.399	8.44457	11.7166	9.45519	8.92576	8.52129	9.80143	6.68656	8.36647	7.21357	8.20075	6.33027	10.6073	6.97723	6.0429
ENSG00000066933.16|MYO9A	11.309	9.29303	10.65	11.8313	9.35422	9.233	9.30808	10.8394	6.49299	7.76768	7.40886	5.41861	7.78311	9.12116	8.15074	10.3361
ENSG00000067048.17|DDX3Y	51.9866	44.2008	40.8601	60.8358	55.1562	58.1906	64.408	63.8268	23.2022	28.9254	26.0991	24.7723	29.0913	29.6195	28.8836	37.1285
ENSG00000067057.18|PFKP	227.159	224.11	258.298	242.838	246.783	271.322	260.403	251.877	299.62	279.455	311.456	310.843	336.308	355.063	307.254	356.907
ENSG00000067064.12|IDI1	18.5934	15.9866	14.2652	18.8952	23.3687	15.7464	20.0726	20.3418	26.2138	27.8113	26.9795	30.2399	30.7091	25.9455	27.6821	34.1663
ENSG00000067066.17|SP100	152.483	162.942	155.418	191.446	172.287	171.26	173.014	158.964	144.363	164.974	148.348	158.143	172.439	181.129	164.217	193.365
ENSG00000067082.15|KLF6	116.926	103.541	119.865	151.092	137.929	123.323	135.843	143.58	159.161	166.928	138.745	152.489	180.14	212.673	193.012	198.482
ENSG00000067113.17|PLPP1	23.7037	17.798	17.2226	23.2195	22.6039	20.6057	21.4887	19.2292	14.778	15.0667	15.1962	12.1878	13.3674	14.8044	11.8266	12.937
ENSG00000067141.17|NEO1	0	0	0	0.035037	0.098082	0.04293	0	0.16384	0.063147	0	0	0	0	0.300859	0.070083	0.041994
ENSG00000067167.8|TRAM1	186.101	173.811	177.167	195.961	207.578	187.937	186.236	188.328	129.102	137.081	149.167	133.955	155.364	148.877	148.301	159.707
ENSG00000067177.15|PHKA1	3.37146	3.46689	5.23181	3.89189	2.89637	3.44172	5.56999	4.23009	4.42462	4.01171	4.92941	4.13616	4.93496	5.29107	4.51638	4.54686
ENSG00000067182.8|TNFRSF1A	182.888	163.437	158.402	153.763	178.132	163.845	182.889	181.222	158.863	161.567	151.445	155.476	138.304	154.308	135.987	142.965
ENSG00000067191.16|CACNB1	9.49734	9.82676	9.9434	11.7359	9.33552	13.0585	16.7063	13.7801	5.1525	10.4234	4.53328	5.16339	4.83719	6.04126	5.35022	7.54733
ENSG00000067208.15|EVI5	17.9396	17.7066	16.823	20.9275	20.1669	19.5261	18.0562	19.356	18.7621	22.2036	19.2289	18.7793	23.648	22.2045	24.1863	28.7671
ENSG00000067221.14|STOML1	7.86817	11.9698	6.93297	11.2148	16.112	14.3451	10.1736	10.3324	17.2808	16.8293	18.3556	15.4249	11.6544	13.0444	11.6364	14.4397
ENSG00000067225.19|PKM	997.96	986.282	1041.91	900.098	1048.09	991.473	1082.72	990.732	866.388	812.19	967.38	878.563	940.868	986.916	898.171	919.277
ENSG00000067248.10|DHX29	20.9878	19.5258	19.9094	23.4555	23.8707	20.6156	22.4131	24.1479	20.6415	19.3199	20.8784	21.4091	21.229	22.8006	21.4613	24.8357
ENSG00000067334.14|DNTTIP2	29.1655	32.0226	32.3549	35.4657	33.0575	33.9509	35.0916	34.564	21.3483	24.9398	26.8957	26.0358	20.668	20.2348	21.2428	24.2438
ENSG00000067365.15|METTL22	23.7294	25.3871	27.1742	33.0416	32.881	26.4217	23.4777	21.6653	11.4979	12.9416	7.07945	11.5358	7.8339	11.453	12.9187	13.9653
ENSG00000067369.14|TP53BP1	28.3147	34.0387	34.9567	42.6825	37.5945	35.1419	33.2962	36.585	25.477	23.6021	20.051	22.4137	30.1313	25.1891	26.8502	27.8736
ENSG00000067445.21|TRO	0.186303	0.103169	0.493547	0.389282	0.649622	0.704317	0.464485	0.834134	3.82656	5.42074	3.96197	3.4269	4.57403	5.64401	4.86911	4.28591
ENSG00000067533.6|RRP15	4.64005	4.38412	3.81693	3.8793	5.04707	4.05609	4.65055	5.5958	7.66203	7.459	6.57587	7.57493	6.19069	6.74403	6.36473	6.66197
ENSG00000067560.14|RHOA	505.53	451.728	480.323	513.477	488.848	486.282	486.99	512.933	580.174	618.857	651.913	635.151	614.123	604.017	607.877	609.823
ENSG00000067596.12|DHX8	21.914	21.878	24.0131	32.6183	27.5416	32.0148	28.0322	32.7168	26.9269	20.7955	26.3873	27.2356	31.2609	22.6033	21.2205	24.0942
ENSG00000067601.8|PMS2P4	5.32579	6.18847	3.26576	4.97741	4.28453	4.71543	6.36604	6.43973	7.9491	9.25916	5.40952	7.08769	8.21698	3.58421	8.70698	6.25324
ENSG00000067606.17|PRKCZ	0.275948	0.35425	1.72975	0.425757	0	0.406696	0	0.469156	0.656692	0.681906	0.309564	0.89223	0.648977	0.796517	0.449618	0.756467
ENSG00000067646.12|ZFY	7.92024	7.41708	5.47256	6.84006	10.0745	6.17033	7.52435	6.40995	4.29927	5.43319	4.83328	4.81939	6.40535	6.74147	6.68125	7.39487
ENSG00000067704.10|IARS2	59.4513	54.0493	54.9206	60.1563	62.0893	61.0374	68.3132	63.4406	58.3693	58.8386	62.7677	62.6626	66.8248	76.1966	67.0998	68.4716
ENSG00000067715.14|SYT1	0.485147	0.752471	0.503752	0.622102	0.964071	0.43831	0.207483	0.394715	0.083152	0.045791	0.196038	0.261768	0.25211	0.339679	0	0.479299
ENSG00000067798.16|NAV3	37.2292	27.6499	40.3683	35.3515	38.9951	31.6454	40.8934	41.6225	21.9993	21.7578	19.9071	18.0149	23.5161	29.1091	17.1168	25.3769
ENSG00000067829.19|IDH3G	57.433	44.1069	57.1215	57.7783	58.2323	55.12	45.8649	59.5657	62.1575	67.9379	63.6721	63.647	47.1758	59.8732	54.3837	57.7704
ENSG00000067836.13|ROGDI	22.0314	17.9156	25.2087	18.9673	19.5179	22.5389	23.1249	22.0118	19.5985	15.8262	15.1138	17.2864	17.8907	23.7522	20.3291	18.7648
ENSG00000067840.13|PDZD4	0.308793	0	0.40359	0.302179	0	0	0.167843	0.213552	0.085184	0.130243	0.138976	0.058281	0.186568	0.080731	0.15272	0.216394
ENSG00000067842.18|ATP2B3	0	0	0	0	0.108245	0	0.020415	0	0	0	0	0	0	0	0	0
ENSG00000067900.8|ROCK1	22.8399	25.3644	24.1801	27.1633	26.8056	28.2359	27.0127	28.7867	16.5391	15.7946	17.8682	15.9148	19.2512	18.5958	20.3799	23.5596
ENSG00000067955.15|CBFB	38.0529	33.6288	35.8197	40.9991	37.1106	39.3287	44.4676	39.8082	50.1355	57.1793	48.4989	42.1375	59.3029	62.6783	56.5678	61.5509
ENSG00000067992.16|PDK3	2.08618	2.72421	3.40559	3.36088	2.80692	2.39953	2.62195	2.81654	3.27234	3.32826	3.30038	3.11945	4.39575	5.35084	4.52095	5.89786
ENSG00000068001.14|HYAL2	248.743	246.7	258.712	184.873	228.882	223.442	283.883	248.873	168.975	192.884	179.113	192.923	166.309	177.249	156.222	152.187
ENSG00000068024.17|HDAC4	9.32839	7.88776	9.85816	6.98338	8.77652	6.02088	7.78753	9.421	4.27154	5.17418	4.52333	3.51433	5.70351	6.40582	5.36667	5.93948
ENSG00000068028.18|RASSF1	42.9407	38.2126	36.8638	40.0353	40.0672	38.49	39.6879	37.9212	36.7663	45.1509	34.7611	43.6886	37.0193	43.5076	40.0815	44.4387
ENSG00000068078.20|FGFR3	0.166745	0.099906	0	0	0.233759	0.133839	0.118325	0.409488	0.372624	0.276129	0.424421	0.584823	1.01013	0.933527	0.321742	0.750839
ENSG00000068079.8|IFI35	113.81	111.247	90.8554	87.4616	91.9369	87.5161	87.7084	74.6613	117.172	122.95	147.028	154.198	133.564	141.445	119.226	117.337
ENSG00000068097.15|HEATR6	7.90501	8.31145	7.53625	9.15476	8.79936	9.98007	9.55862	9.8814	6.86583	8.21577	6.67681	6.58273	7.2339	7.26114	6.2788	7.91048
ENSG00000068120.15|COASY	48.4548	56.0678	55.0544	57.0545	53.7979	56.6412	63.7366	45.578	34.3548	37.6641	35.0756	36.4814	32.8179	34.922	34.1288	27.9921
ENSG00000068137.15|PLEKHH3	13.4299	12.469	12.0494	10.0612	9.81402	14.0727	15.6584	16.3694	5.36106	6.90419	3.21109	4.47649	5.45519	5.86572	5.55292	5.43994
ENSG00000068305.17|MEF2A	35.7131	41.359	45.124	52.282	40.6557	47.9211	46.0838	43.2609	22.1328	24.0792	21.7291	21.2495	26.1379	27.5741	28.2564	32.1397
ENSG00000068308.14|OTUD5	70.0787	56.3319	63.4641	66.4033	57.0602	63.0508	67.2764	68.5972	53.3217	45.9613	52.6731	58.5726	50.7824	60.793	50.1039	54.7782
ENSG00000068323.17|TFE3	57.2601	58.5393	69.5945	59.4025	60.3037	59.9246	68.6176	63.1067	45.9654	45.7848	44.5128	43.8572	43.526	47.1491	40.1354	42.0404
ENSG00000068354.16|TBC1D25	14.9744	14.5014	12.551	14.067	13.7072	17.0352	14.3061	14.4849	11.9105	13.4513	12.4845	12.0617	14.6233	12.6984	12.6879	14.6176
ENSG00000068366.21|ACSL4	46.3049	44.4831	46.2154	50.0111	51.9592	52.0294	52.9857	51.2864	49.9542	49.525	62.7993	51.115	69.9479	68.0816	63.1685	70.4192
ENSG00000068383.19|INPP5A	17.7475	16.8532	14.8036	15.5247	22.5665	16.3708	21.793	15.0383	15.8949	19.0563	16.4556	15.753	16.8979	17.7003	17.5223	18.6415
ENSG00000068394.11|GPKOW	35.7267	34.4317	31.5599	32.3974	29.1032	35.283	37.9692	38.0847	33.0207	30.4908	38.1058	30.5098	28.3919	33.3666	31.2508	27.9963
ENSG00000068400.13|GRIPAP1	59.2208	60.4916	63.31	67.3946	68.3212	64.5753	71.6744	65.82	34.0972	41.874	32.4199	32.7394	33.1109	37.1959	42.2766	43.6177
ENSG00000068438.15|FTSJ1	29.0776	32.5096	28.2033	30.6485	31.5686	34.2969	32.274	34.7583	50.4581	56.6759	44.6336	53.172	51.676	53.7233	46.9579	40.5293
ENSG00000068489.13|PRR11	1.79188	2.57984	1.88817	3.48558	3.35892	4.0933	2.53477	3.40523	15.3159	15.8661	16.7512	15.6509	15.0882	13.124	8.22407	7.45611
ENSG00000068615.19|REEP1	0.085432	0.457471	0.876244	0.03202	0.085184	0	0.170019	0.312323	0	0	0	0.052136	0	0	0	0
ENSG00000068650.19|ATP11A	34.1773	29.9832	31.5463	38.9095	37.2513	34.5206	42.1073	39.5945	31.5197	36.2355	27.3929	27.4727	40.1198	39.6518	34.7833	48.4608
ENSG00000068654.17|POLR1A	20.0569	17.3013	21.2088	22.6321	20.4803	19.335	21.0041	21.7527	33.8786	31.3002	29.4994	26.8105	30.9811	29.1646	29.6365	33.5556
ENSG00000068697.7|LAPTM4A	327.778	303.43	292.416	324.019	363.611	401.337	391.471	406.478	241.174	274.294	225.933	278.877	289.89	288.216	303.532	304.201
ENSG00000068724.17|TTC7A	17.8925	12.8184	17.8358	15.9336	14.9287	17.9812	17.5873	14.819	9.65605	10.5051	7.82972	8.78165	10.1388	11.0836	10.509	9.56019
ENSG00000068745.15|IP6K2	75.1628	68.1474	92.5802	80.8849	92.2852	72.261	73.4888	82.0553	45.0114	63.8666	34.8148	44.328	42.4699	46.4414	58.6918	54.9574
ENSG00000068781.21|STON1-GTF2A1L	0.987989	0.234747	0	0	0	0	0.34157	0.045141	0.185043	0	0.181501	0.155735	0.195766	0.198587	0.047511	0.192979
ENSG00000068784.13|SRBD1	7.02161	9.75324	11.3534	8.07656	7.91722	7.92029	9.42587	8.94361	14.2242	14.2556	17.2208	14.0618	16.1138	15.0509	13.2339	14.4746
ENSG00000068796.19|KIF2A	20.9736	19.2172	21.9226	21.2873	23.1117	22.8151	23.9245	26.2758	15.6048	16.5356	21.5076	14.7978	19.5341	21.8553	15.9879	17.7463
ENSG00000068831.19|RASGRP2	1.61496	1.01815	3.76179	1.03609	3.76585	2.61988	3.22818	2.77314	0	0	0	0	0	0.255813	0.194423	0.315786
ENSG00000068878.15|PSME4	31.3568	29.3586	31.2387	35.2348	31.2093	30.2603	32.6413	36.1033	31.4008	37.2138	29.9205	30.437	35.2949	33.4509	32.4419	41.1
ENSG00000068885.15|IFT80	8.98564	12.0537	15.0569	19.425	13.0019	16.2596	20.258	14.5489	9.58199	10.031	9.47183	8.68079	8.33797	9.77162	11.5549	11.8493
ENSG00000068903.20|SIRT2	85.9353	79.3394	83.4425	80.3366	81.9111	86.3439	80.847	81.279	63.783	65.5649	66.5693	67.1093	63.9452	71.7105	64.9677	65.9941
ENSG00000068912.14|ERLEC1	50.424	48.978	46.7501	53.1135	55.8507	52.7719	55.6363	55.7491	37.5078	40.57	36.3169	39.1226	42.9551	42.7315	39.3786	43.9306
ENSG00000068971.14|PPP2R5B	36.1553	30.9831	32.2992	34.927	41.6514	35.1052	28.9504	38.7413	18.4506	22.0997	19.6187	20.2687	25.244	31.8215	27.68	25.8066
ENSG00000068976.14|PYGM	0.543464	0.971158	0.205357	0.356585	0.608938	0.804638	0.481468	0.427411	0.159851	0.410761	0.112106	0.259155	0	0.317251	0	0.275389
ENSG00000068985.5|PAGE1	0	0	0	0	0	0	0	0	0	0	0	0	0	0	0	0
ENSG00000069011.16|PITX1	0	0	0.696492	0	0.441447	0	0	0.081388	0.108749	0.205477	0.351145	0.185497	0.378179	0	0	0.361527
ENSG00000069018.19|TRPC7	0	0	0	0	0	0	0	0	0	0	0	0	0	0	0	0
ENSG00000069020.18|MAST4	41.8863	47.3437	44.0918	48.5208	43.6746	43.3537	40.2127	41.9137	26.6868	24.4449	21.9362	22.4736	32.4908	31.7849	34.1017	39.1012
ENSG00000069122.19|ADGRF5	162.831	150.913	165.983	181.46	190.825	191.224	193.438	190.815	0.298376	0.417883	0.535543	0.391543	0.417596	0.430946	0.30222	0.25022
ENSG00000069188.17|SDK2	0.012933	0	0.080342	0.082827	0	0.028392	0	0.028183	0	0.052824	0	0.034721	0.030461	0.044833	0.035334	0
ENSG00000069206.15|ADAM7	0	0	0	0	0	0	0	0	0	0	0	0	0	0	0	0
ENSG00000069248.12|NUP133	14.2792	14.1744	15.6568	16.4472	13.9846	16.7283	17.0639	17.6839	22.2965	22.2477	21.7944	20.4636	22.2044	21.686	20.1102	23.1246
ENSG00000069275.13|NUCKS1	45.1508	42.3847	50.6237	53.9822	52.3863	46.0409	48.4858	47.4253	80.23	68.2617	78.5775	70.7532	80.8213	80.6615	73.9734	72.1793
ENSG00000069329.18|VPS35	51.7327	46.2525	50.8845	58.7389	53.2167	71.9499	55.755	57.4839	59.5406	51.9877	58.9562	53.5302	72.219	61.9671	63.8753	61.6052
ENSG00000069345.12|DNAJA2	40.6256	45.3119	43.5922	48.0369	48.2089	45.0587	51.1347	52.201	47.2882	46.2807	49.749	47.9949	51.4853	51.7333	42.612	49.0586
ENSG00000069399.15|BCL3	40.8693	31.3645	34.0904	30.8658	40.7294	40.9971	48.7386	39.8846	26.9305	34.6295	25.1183	28.9848	27.6571	29.8766	28.0207	28.7288
ENSG00000069424.15|KCNAB2	8.83407	6.02989	7.3897	9.16072	9.49963	10.0397	9.22936	10.0254	6.09928	7.43054	3.95042	4.42163	4.53857	5.50527	6.27682	3.40946
ENSG00000069431.13|ABCC9	0	0	0.041827	0.08738	0.175153	0	0	0.007269	0	0.011377	0.009581	0.037043	0	0.034802	0.071392	0
ENSG00000069482.7|GAL	2.43537	1.29373	2.00935	1.34477	1.65013	1.47472	0.626416	1.91655	2.93454	2.83352	4.5426	3.14962	2.7826	3.27831	2.96931	3.81843
ENSG00000069493.15|CLEC2D	2.42457	1.2448	3.52014	4.85129	2.22131	2.3752	4.35615	3.32058	1.28616	2.58272	0.840925	2.39074	1.20705	3.01236	1.47897	1.62462
ENSG00000069509.6|FUNDC1	14.452	17.883	14.7945	21.685	21.7136	15.9578	20.953	16.5507	19.7507	19.8932	18.0759	20.8915	16.6711	18.1097	21.0977	24.8203
ENSG00000069535.14|MAOB	0	0	0	0	0	0	0	0	0	0	0	0	0	0	0	0
ENSG00000069667.16|RORA	16.4367	14.7171	17.2067	20.0177	16.273	16.3942	16.5068	15.4971	8.90155	7.6093	6.69989	6.69708	12.4452	12.3226	14.4952	18.1809
ENSG00000069696.7|DRD4	1.14509	0.973132	0	1.99728	1.23548	0.441597	0.471504	1.69945	0.870404	1.69452	0.260826	0.244328	0.919527	0.199341	0.433285	0
ENSG00000069702.11|TGFBR3	6.41252	6.9946	8.10412	8.45276	8.00763	8.01187	7.80429	8.94581	6.04569	5.38123	7.31313	6.52211	6.8318	9.03654	5.26253	7.03508
ENSG00000069764.10|PLA2G10	0	0.083988	0	0	0	0	0	0	0	0	0	0	0	0	0	0
ENSG00000069812.11|HES2	15.54	13.3753	17.4	16.7497	17.2345	13.322	16.4272	13.5374	10.0994	12.6686	10.9053	13.3548	11.884	12.3674	14.6665	14.3683
ENSG00000069849.11|ATP1B3	373.517	373.36	312.112	348.558	382.608	380.057	392.589	378.41	184.438	203.84	193.86	211.881	211.966	214.191	203.116	221.581
ENSG00000069869.17|NEDD4	47.8571	43.2354	38.9653	52.6401	51.1012	43.9062	52.6902	49.8627	20.3153	19.7395	20.7247	20.6638	26.8136	25.3287	22.0023	30.7417
ENSG00000069943.10|PIGB	10.1475	10.9452	10.0706	16.0197	9.23363	12.1711	10.2979	12.4953	8.75416	11.4863	10.9041	9.8322	9.21535	11.516	8.93565	10.9813
ENSG00000069956.13|MAPK6	24.1559	22.2959	22.7689	24.2435	23.4615	24.3095	26.7891	25.4525	17.4963	20.8508	19.8813	19.6604	23.4797	19.9308	22.8997	24.6443
ENSG00000069966.19|GNB5	14.2441	14.4445	9.21273	20.066	15.0621	14.752	14.137	14.9778	15.058	16.2685	12.8151	14.5863	17.9133	19.1115	15.1239	16.9981
ENSG00000069974.16|RAB27A	15.0564	16.5154	13.1067	21.6736	13.1904	17.5575	17.5326	16.3193	20.472	21.2318	16.0176	15.3491	17.6497	16.5338	14.9337	18.6754
ENSG00000069998.12|HDHD5	30.2648	28.4086	23.2862	30.98	35.2838	32.3934	31.108	32.6612	36.5694	36.0193	34.5019	37.9638	38.2752	41.0726	37.7148	39.6051
ENSG00000070010.19|UFD1	60.3707	62.9162	58.6098	61.1599	59.7978	61.3592	55.4461	58.0963	64.8529	69.3566	63.9417	65.8902	61.576	59.253	64.1834	58.6269
ENSG00000070018.9|LRP6	8.61853	8.8401	8.85751	10.1384	10.7918	9.79877	9.55265	9.84621	6.97425	7.11918	7.16105	6.77555	9.92826	9.09786	7.49479	11.0168
ENSG00000070019.5|GUCY2C	0	0	0	0.03334	0.061903	0	0	0	0	0	0	0	0	0	0	0
ENSG00000070031.4|SCT	0	0	0	0	0	0	0	0	0	0	0	0	0	0	0	0
ENSG00000070047.13|PHRF1	37.8325	34.1203	41.4728	41.5854	38.0268	40.4853	44.2342	44.5557	30.8265	36.163	28.7484	30.2036	30.1688	36.743	31.9571	36.2543
ENSG00000070061.16|ELP1	14.9499	14.5979	18.06	18.4426	23.7774	18.623	20.388	19.2594	14.4445	16.4129	15.9661	14.3748	18.2769	16.3295	14.3371	17.6368
ENSG00000070081.17|NUCB2	69.8006	74.1658	79.2402	79.592	76.9316	73.0038	67.8966	65.6496	29.8269	43.845	43.0979	41.9855	42.5302	40.2644	42.3607	41.0725
ENSG00000070087.14|PFN2	89.8464	93.3164	90.486	112.66	108.313	110.691	111.507	103.656	115.465	119.88	97.7327	116.231	116.152	130.771	115.263	105.542
ENSG00000070159.14|PTPN3	0	0	0.133268	0	0	0	0.146487	0.133409	0.032246	0.025925	0.11607	0.058496	0	0.037748	0.058998	0.068754
ENSG00000070182.21|SPTB	0	0.029762	0	0	0.014267	0.033372	0	0.013497	0	0	0.020798	0	0	0	0	0
ENSG00000070190.13|DAPP1	0	0.098297	0	0	0	0	0	0	0	0	0	0	0	0	0	0
ENSG00000070193.5|FGF10	0.047115	0	0	0	0	0	0	0	0	0	0	0	0	0	0	0
ENSG00000070214.16|SLC44A1	22.2904	18.4837	23.3663	27.7935	25.8609	25.0079	24.5906	23.3712	25.2216	30.4449	26.4049	24.5997	32.1342	33.1964	35.2678	33.4992
ENSG00000070269.14|TMEM260	12.2179	12.3404	16.1504	16.8039	19.993	17.1008	15.1052	14.2376	11.1516	15.421	12.7734	12.2842	14.6954	13.6852	13.9814	16.5501
ENSG00000070366.14|SMG6	49.0311	38.373	48.1489	40.4198	44.6697	39.9163	40.3356	38.9373	33.3885	35.2992	30.2191	30.6831	36.0927	36.7722	39.2732	41.7048
ENSG00000070367.16|EXOC5	26.7279	47.9087	22.4978	30.4689	31.1426	37.5701	27.4356	42.6863	19.6195	24.8796	25.1223	19.7825	22.7345	24.064	29.9972	28.0703
ENSG00000070371.16|CLTCL1	5.66797	4.7321	4.8958	4.55716	4.43327	6.0462	6.49123	4.76656	2.45959	3.08965	2.47563	2.76469	2.61501	2.62258	4.14037	4.37597
ENSG00000070388.11|FGF22	0	0.298555	0	0	0	0.549743	0.746987	0.365276	0.216914	0	0	0.165542	0	0	0	0
ENSG00000070404.10|FSTL3	45.8152	35.5169	48.8237	40.702	52.9889	42.9226	49.4883	44.4051	62.8542	66.1647	64.2547	63.4483	89.1912	92.6358	112.136	105.298
ENSG00000070413.20|DGCR2	36.3755	34.7357	39.556	37.2646	41.8587	39.7316	42.8133	39.5021	33.113	34.2078	29.1527	31.8666	31.4605	36.8823	31.5988	34.4981
ENSG00000070423.18|RNF126	62.9965	62.119	55.7793	53.5686	61.1511	57.0506	74.4886	71.7792	62.3682	67.2039	60.1617	62.2824	57.0142	61.3218	54.1272	59.4229
ENSG00000070444.15|MNT	31.0055	23.7197	26.2797	24.9852	29.2313	28.6195	26.9344	31.973	15.1364	19.7287	13.3587	15.7759	16.0847	18.7958	18.19	24.4581
ENSG00000070476.15|ZXDC	18.244	13.5161	15.2969	17.2591	17.001	16.7142	16.8133	17.8494	11.8983	15.2809	13.5602	11.7611	14.9458	17.7738	12.0613	14.7466
ENSG00000070495.15|JMJD6	35.7276	27.3893	35.2589	39.2155	36.1838	35.8147	34.0327	34.089	30.3953	33.5722	32.098	32.0449	36.8371	36.7499	38.5066	38.0566
ENSG00000070501.12|POLB	16.8467	15.4401	22.174	23.7413	20.244	16.4181	19.6861	18.6182	17.9058	24.3349	13.1198	17.2557	14.5851	16.386	13.3123	15.0438
ENSG00000070526.15|ST6GALNAC1	0.107859	0	0	0	0	0	0	0	0	0	0	0	0	0	0	0
ENSG00000070540.13|WIPI1	47.3253	49.1144	51.0812	45.6676	53.9049	56.0573	49.3423	55.2575	43.1736	45.8196	36.6983	38.9034	49.8936	50.5306	44.3015	54.5815
ENSG00000070601.10|FRMPD1	0	0	0	0	0.053402	0	0	0	0	0	0	0	0	0	0.344291	0
ENSG00000070610.14|GBA2	47.5067	42.0894	52.5095	61.0119	64.0337	64.14	66.6766	72.0387	19.7716	30.5619	13.9437	20.4474	16.6624	21.995	21.3774	21.3046
ENSG00000070614.15|NDST1	125.362	117.669	130.892	130.583	136.033	137.04	140.049	135.626	68.6747	59.7377	58.1889	56.5756	62.8433	72.374	59.2072	65.6685
ENSG00000070669.17|ASNS	89.3966	97.1486	83.2395	96.4422	76.1653	70.9717	85.0012	71.9943	54.5036	59.3446	37.6669	34.6245	35.788	31.6832	23.3423	27.9182
ENSG00000070718.12|AP3M2	17.6502	16.3643	17.5607	18.5689	30.4856	17.8012	17.1757	16.8117	11.6155	13.2523	10.8711	11.5714	12.77	14.5503	12.8778	12.8534
ENSG00000070729.14|CNGB1	0	0	0	0	0	0	0	0.016071	0	0	0.018259	0.110489	0	0	0	0.035215
ENSG00000070731.11|ST6GALNAC2	1.66392	1.80849	1.2734	0.739141	2.97108	0.725271	0.606124	1.95938	0.403259	0.310762	0.908516	1.12164	0.749232	1.26321	0.311271	0.890561
ENSG00000070748.19|CHAT	0.021375	0	0	0	0	0	0	0	0	0	0	0	0	0	0	0
ENSG00000070756.17|PABPC1	755.461	665.458	791.663	753.994	860.876	763.947	812.928	814.761	981.83	959.496	1100.87	889.088	984.254	1006.76	939.721	1016.23
ENSG00000070759.17|TESK2	2.04975	2.01177	2.37408	0.903296	1.35021	1.89593	0.914584	1.5789	0.712874	1.15705	1.25099	0.877708	1.144	0.823321	1.69952	1.66806
ENSG00000070761.8|CFAP20	32.1997	33.3876	35.6169	38.1555	39.5826	36.2282	35.5195	37.2646	35.2164	41.373	35.807	36.9127	34.3409	35.0472	28.8271	31.7416
ENSG00000070770.10|CSNK2A2	55.9813	55.54	58.4336	59.8327	60.5018	54.4126	60.4077	68.337	40.8338	47.3439	43.6027	41.5881	45.8212	48.2363	41.0707	49.5702
ENSG00000070778.13|PTPN21	16.9408	16.0458	18.9076	18.0273	15.6913	16.837	19.4271	20.1648	12.0716	11.5897	10.772	13.2552	15.6996	16.6933	14.5695	15.6731
ENSG00000070785.17|EIF2B3	23.4984	18.1812	17.2764	18.6042	21.6215	19.2583	16.9159	13.0807	28.2206	28.9342	25.6164	31.6652	22.808	23.0028	24.5556	23.2632
ENSG00000070808.17|CAMK2A	0	0	0	0	0.465149	0	0	0	0	0	0	0	0	0	0.069191	0
ENSG00000070814.22|TCOF1	22.4174	19.8053	27.9741	23.4734	22.8707	22.0352	25.2877	26.1879	33.3712	27.7398	32.1856	31.2015	26.6094	27.9994	23.9869	23.4006
ENSG00000070831.17|CDC42	143.295	146.362	200.288	177.862	203.755	181.647	210.524	180.999	283.968	201.037	287.76	225.819	284.478	224.307	230.51	217.585
ENSG00000070882.13|OSBPL3	40.0463	36.8361	36.1548	46.773	47.7507	37.7602	47.8424	44.5473	18.1332	24.8821	17.7056	16.6171	19.4778	21.0557	20.9852	24.56
ENSG00000070886.12|EPHA8	0	0	0.069475	0	0	0	0	0	0	0	0	0	0	0	0	0
ENSG00000070915.10|SLC12A3	0	0	0	0	0	0	0	0.007997	0	0	0	0	0	0	0	0
ENSG00000070950.10|RAD18	2.98964	2.96636	3.26131	3.27063	3.24043	2.55727	3.70538	3.3004	4.98799	5.49479	6.30687	5.71655	5.35149	5.31106	4.59306	4.28855
ENSG00000070961.16|ATP2B1	20.8244	17.3354	18.0354	19.994	22.2039	20.8279	24.4892	24.3734	15.6174	15.5784	15.0637	13.9478	17.8851	16.6501	16.4727	19.9649
ENSG00000070985.13|TRPM5	0	0	0	0	0	0	0	0	0	0	0	0	0	0	0	0
ENSG00000071051.14|NCK2	33.958	30.8243	29.0583	32.0529	28.1254	26.6349	32.7049	33.1858	24.8938	27.5296	28.8557	23.6124	33.3874	36.2347	26.4755	30.9987
ENSG00000071054.16|MAP4K4	272.807	293.234	349.48	326.666	346.525	289.901	314.019	319.603	261.516	205.811	221.443	222.632	250.138	247.428	236.524	248.47
ENSG00000071073.13|MGAT4A	16.577	14.7921	16.9208	18.9558	17.7262	17.0966	17.964	17.7293	8.47784	9.02249	9.47674	8.725	12.442	8.29494	6.98053	10.072
ENSG00000071082.11|RPL31	570.673	615.267	623.012	627.488	588.458	609.144	549.325	581.342	935.446	920.211	850.983	957.497	858.862	739.199	942.589	740.159
ENSG00000071127.17|WDR1	381.059	355.07	395.038	360.301	395.523	388.637	389.72	386.594	586.032	529.617	597.01	564.384	599.593	623.255	561.281	617.198
ENSG00000071189.21|SNX13	12.0341	11.3566	11.8624	13.3714	11.5883	12.6698	12.7049	13.844	7.79756	10.0989	8.88076	7.99193	8.69325	9.4516	8.54617	11.1116
ENSG00000071203.9|MS4A12	0	0	0	0	0	0	0	0	0	0	0	0	0	0	0	0
ENSG00000071205.12|ARHGAP10	17.1626	13.5966	15.8406	15.4105	13.8139	17.5071	17.3852	16.0636	19.8482	14.8923	15.411	15.7706	16.3626	15.5792	21.5989	18.6253
ENSG00000071242.12|RPS6KA2	104.964	91.1258	102.584	102.121	122.431	112.476	123.565	110.943	59.513	52.5358	54.2277	49.7351	69.1675	70.143	57.4033	67.431
ENSG00000071243.16|ING3	6.4777	7.31129	6.60902	6.53079	8.67307	7.60438	9.17221	8.01444	5.91043	7.89789	5.93382	7.16885	7.74639	6.44705	6.56489	5.91065
ENSG00000071246.11|VASH1	73.6614	63.4664	71.6277	64.5662	81.1323	81.3175	71.933	73.0658	18.0723	16.2545	14.7621	14.775	16.2717	18.7056	17.0978	19.468
ENSG00000071282.12|LMCD1	0.536215	0.171446	0.656576	0.629119	1.99293	0.768783	4.75794	0.86968	1.08457	0.674828	0.709422	0.864684	1.20643	0.844253	0.47971	0.245913
ENSG00000071462.12|BUD23	77.695	73.7098	76.1224	70.1351	74.4324	75.3979	80.2489	81.6904	77.4226	78.3474	77.7484	72.081	78.7615	68.3834	68.9453	74.7029
ENSG00000071537.14|SEL1L	44.8091	45.8999	52.5357	53.3072	55.5093	50.5737	54.3302	59.1173	37.1336	33.5059	36.8846	37.0967	53.7525	49.3386	45.1498	53.7592
ENSG00000071539.14|TRIP13	2.65563	2.34422	2.46778	2.35964	2.1516	3.2165	1.74064	1.97355	16.279	19.9747	16.7614	17.9993	12.7531	13.2954	8.31017	8.9867
ENSG00000071553.18|ATP6AP1	139.536	231.67	138.769	143.428	260.765	246.345	151.423	237.539	190.131	110.267	183.208	108.953	128.353	204.57	209.026	186.529
ENSG00000071564.17|TCF3	74.6925	81.7911	72.2528	65.1651	78.715	83.4881	83.4912	91.3838	64.3027	70.6523	54.8975	66.1177	63.3419	71.8315	60.857	68.9449
ENSG00000071575.12|TRIB2	2.93508	2.5312	4.14118	2.66764	2.9636	3.1813	3.88886	3.59637	2.86442	3.17548	2.38295	2.99247	4.72723	4.54454	3.90579	4.47438
ENSG00000071626.17|DAZAP1	96.2252	82.9387	89.1972	96.4681	95.8295	91.3054	93.1772	88.5418	92.4824	107.226	83.8351	95.0348	90.4312	105.081	96.7097	99.7086
ENSG00000071655.18|MBD3	62.4908	65.3127	66.9997	65.4373	64.8094	72.9967	68.8201	57.0745	53.9892	63.0871	67.9298	55.6673	51.6825	66.6526	50.5287	59.7989
ENSG00000071677.1|PRLH	0	0	0	0	0	0	0	0	0	0	0	0	0	0	0	0
ENSG00000071794.16|HLTF	12.5918	15.0788	16.3723	19.9374	17.8612	14.596	18.798	16.5818	10.9686	10.2879	10.6312	9.49993	12.7953	12.3085	10.2215	16.7073
ENSG00000071859.15|FAM50A	182.314	171.953	184.327	189.508	200.289	192.919	203.666	186.049	195.452	185.089	197.647	204.377	174.879	197.58	199.109	196.295
ENSG00000071889.17|FAM3A	39.6923	25.8235	32.2279	30.3911	30.8954	39.0372	34.9693	32.2102	31.1857	35.4554	36.6358	34.9258	34.0486	38.399	45.2312	39.7131
ENSG00000071894.17|CPSF1	95.8451	78.757	98.9319	98.896	102.682	117.002	126.676	124.04	50.5798	74.1575	46.7855	56.5341	46.777	53.8782	56.4203	69.4719
ENSG00000071909.19|MYO3B	0	0.077378	0	0.09383	0	0.052452	0	0	0	0.034849	0	0	0	0	0.099884	0
ENSG00000071967.12|CYBRD1	52.5158	41.9565	50.0206	51.2908	50.1067	47.8354	52.5402	48.0731	34.1944	38.2623	35.2595	34.1734	44.0413	42.0647	38.1124	43.3957
ENSG00000071991.9|CDH19	0	0	0	0	0	0	0	0	0	0	0	0	0	0	0	0
ENSG00000071994.11|PDCD2	33.0309	31.4376	26.3177	31.0737	25.7803	27.4933	28.7152	30.6604	40.2375	40.2338	38.3559	39.7439	41.8906	37.8422	43.7145	37.065
ENSG00000072041.18|SLC6A15	0.766591	0.417495	0.963245	1.43047	0.744678	0.276696	0.619749	0.840203	0.479085	1.15086	0.335799	0.252611	0.783878	0.563015	0.535972	0.412435
ENSG00000072042.13|RDH11	57.5289	64.6516	57.2455	62.8679	66.0489	59.4616	59.9531	59.4775	52.7739	49.6686	57.3471	53.615	60.475	58.2545	58.3515	60.5988
ENSG00000072062.15|PRKACA	93.7902	86.0516	113.786	104.381	108.1	96.7861	104.578	103.58	97.4516	104.713	104.448	96.348	97.7354	102.965	95.4138	112.38
ENSG00000072071.16|ADGRL1	6.22708	6.35313	5.13693	7.11788	7.033	7.09784	6.65368	7.70145	2.62485	2.68189	2.59884	1.93276	3.57408	3.36562	3.27955	4.91289
ENSG00000072080.11|SPP2	0	0	0	0	0	0	0	0	0	0	0	0	0	0	0	0
ENSG00000072110.16|ACTN1	465.508	535.991	454.26	509.008	559.875	432.185	484.142	563.078	600.571	569.992	626.347	583.682	587.523	570.903	653.515	515.838
ENSG00000072121.17|ZFYVE26	28.3079	24.7305	30.1038	28.2584	26.123	31.8496	31.526	30.0976	24.3581	27.611	23.1608	21.3339	31.8084	31.8351	27.7989	33.1024
ENSG00000072133.11|RPS6KA6	0.188741	0	0	0.265719	0	0.319575	0.039707	0.15421	0.087795	0.195507	0.161266	0.215551	0.449804	0.191236	0.328564	0.304041
ENSG00000072134.15|EPN2	44.2546	45.0165	36.3155	40.4727	42.0391	37.228	41.3199	42.2641	29.8304	35.1046	29.2873	27.2332	36.6069	30.8213	31.5444	33.8197
ENSG00000072135.13|PTPN18	21.2944	13.603	22.2988	17.4789	22.6015	27.5432	19.4257	22.184	12.7798	17.9243	12.6331	13.8334	11.6748	20.1729	13.6972	17.9137
ENSG00000072163.20|LIMS2	41.3605	35.2524	43.7002	33.5632	44.9178	41.0205	42.9256	38.2371	36.7699	44.5816	38.3618	42.6514	39.7882	39.5533	41.2109	48.3065
ENSG00000072182.13|ASIC4	0.085802	0	0.333746	0.07702	0.023811	0.092735	0.142552	0.03792	0	0	0	0	0	0.099306	0.077541	0
ENSG00000072195.15|SPEG	0.926022	0.18005	0.31128	0.430611	0.835125	1.91085	1.24726	1.62579	0.944248	1.22578	1.02952	1.18932	2.01236	0.557875	1.28283	1.12512
ENSG00000072201.14|LNX1	2.7152	2.95294	2.45769	4.50036	3.01368	3.3043	5.20598	4.79148	3.96443	3.38822	4.24347	4.19442	3.14662	3.30424	2.23494	2.4266
ENSG00000072210.19|ALDH3A2	46.2087	56.3738	63.2886	53.5134	46.8885	51.0209	46.856	54.9216	32.361	37.1592	35.7058	29.2977	27.8076	26.7878	27.2706	34.1082
ENSG00000072274.13|TFRC	45.729	46.7118	47.4628	53.8366	52.3239	51.1786	60.4116	55.7188	72.0516	66.918	73.5305	67.7199	81.3885	79.2285	69.4576	86.1579
ENSG00000072310.18|SREBF1	48.1125	37.5895	49.59	44.5838	46.6377	53.5153	55.3227	47.9838	20.519	27.068	19.228	20.2667	25.2392	27.4046	26.789	28.9647
ENSG00000072315.4|TRPC5	0	0	0	0	0	0	0	0	0	0	0.008592	0.027077	0	0	0	0
ENSG00000072364.13|AFF4	51.6487	48.2333	49.5962	56.4658	49.8661	47.4811	54.6809	53.8002	47.9307	45.4775	46.2894	37.1848	65.7578	61.7202	53.3228	69.5067
ENSG00000072401.15|UBE2D1	21.3722	21.8846	17.4529	20.6621	22.9352	23.5739	19.8913	22.6798	15.2668	17.3787	15.5362	15.5476	15.0136	17.8349	17.0192	16.1011
ENSG00000072415.10|MPP5	18.0675	17.2975	19.2605	21.5812	21.0464	19.2118	20.115	18.9735	16.0022	17.1289	15.4075	14.23	16.4537	16.751	15.6323	19.9528
ENSG00000072422.17|RHOBTB1	18.6047	16.5494	17.5347	21.8532	23.5593	22.0849	25.0136	21.5102	11.1435	10.0602	9.73368	10.7268	11.1801	11.4193	10.4331	13.8281
ENSG00000072501.19|SMC1A	11.5891	10.3727	11.7745	10.9231	14.1762	11.1902	14.4818	12.1741	19.8969	17.413	17.2546	17.7686	19.308	19.1386	16.899	19.3833
ENSG00000072506.14|HSD17B10	58.7508	60.8057	49.0362	53.02	62.5007	67.0447	59.3293	55.2365	115.131	119.333	103.221	121.354	102.406	107.753	104.145	94.3702
ENSG00000072518.22|MARK2	35.0692	35.5128	32.0608	32.4193	43.1229	38.7601	33.1157	30.188	21.0973	28.591	19.221	20.8006	25.0988	28.8166	21.9171	25.0925
ENSG00000072571.20|HMMR	0.228761	0.675511	0.340868	0.211326	0	0	0.591734	0.440114	7.77266	8.78218	8.93059	9.43447	7.26507	7.62503	3.1004	2.84038
ENSG00000072609.18|CHFR	36.1786	54.16	57.7571	69.2079	57.2813	70.6611	63.3232	66.8746	27.3554	49.9722	27.0713	30.5072	26.8665	38.0666	47.3125	59.0234
ENSG00000072657.10|TRHDE	0.018808	0	0.016316	0	0.001321	0	0.06268	0	0	0	0	0	0	0	0	0
ENSG00000072682.20|P4HA2	134.554	123.059	114.648	118.522	116.184	149.749	134.39	144.439	78.9259	83.5188	83.3904	85.7438	117.943	115.651	113.27	135.223
ENSG00000072694.21|FCGR2B	0	0	0	0	0.156522	0.108079	0	0	0	0	0	0.011593	0	0	0	0
ENSG00000072736.19|NFATC3	14.3721	11.9351	16.0026	14.4141	16.3	12.5657	12.5625	15.0238	16.4208	16.3009	13.1721	13.4273	15.0616	16.1825	13.2463	14.0737
ENSG00000072756.17|TRNT1	20.8355	20.23	22.578	28.7822	25.9386	25.5236	24.682	24.9738	18.8039	22.5077	19.5701	18.2484	16.4408	15.4613	14.7392	14.4755
ENSG00000072778.20|ACADVL	269.537	237.631	262.833	295.457	333.779	351.408	357.756	339.735	147.13	228.344	142.969	188.235	169.754	171.95	199.281	238.754
ENSG00000072786.13|STK10	50.2385	53.4118	51.191	51.3286	53.5311	47.4523	60.4659	54.8283	36.3416	42.348	32.672	33.1683	40.3138	45.299	42.1393	46.5582
ENSG00000072803.18|FBXW11	35.7144	31.5173	32.3606	35.3056	33.5394	36.8691	35.9233	36.7444	31.0908	28.6313	30.2284	25.1299	34.5274	31.6573	30.5561	37.4729
ENSG00000072818.12|ACAP1	0	0.533522	4.27104	5.23462	5.06102	0.480273	0.350127	0.485255	2.14873	3.60447	2.03027	4.34713	1.39827	3.98659	0.687844	0.259932
ENSG00000072832.15|CRMP1	0.690582	0	0.439001	0	0	0	0.097756	0	0.415836	0.219508	0.158345	0.219839	0.334853	0.200422	0.518811	0
ENSG00000072840.13|EVC	46.4013	41.1707	50.003	43.1695	44.6068	42.0183	43.3863	45.2397	27.0139	25.9922	20.0667	20.1178	26.3678	28.6744	24.2868	30.1129
ENSG00000072849.11|DERL2	19.9692	17.1608	21.42	24.097	20.6493	23.8371	23.9071	24.1711	18.3184	23.2809	22.019	21.519	21.1007	22.2245	19.8611	21.726
ENSG00000072858.11|SIDT1	0.114799	0.029434	0.760189	0	0.748265	0	0.019895	0.172558	0.310689	0.850522	0.287282	0.616763	0.693057	1.32356	0.618821	0.562235
ENSG00000072864.16|NDE1	24.7908	22.0872	15.8366	14.9622	22.1624	22.1668	29.8074	21.869	22.1047	19.9432	17.128	17.3902	15.0721	17.7121	14.8168	17.0134
ENSG00000072952.20|IRAG1	0.403215	0.407931	0.171196	0.367836	0.652185	0.490517	0.178481	0.461642	0.103102	0.093517	0.098245	0.09263	0.065174	0.053889	0.076103	0.133205
ENSG00000072954.7|TMEM38A	7.50495	5.21823	6.81162	5.99288	4.03618	4.83702	5.0645	5.14616	2.39266	2.45882	2.70153	2.91859	2.11975	4.19719	3.53822	3.50762
ENSG00000072958.9|AP1M1	26.4004	20.7036	53.1362	51.6206	40.2155	61.0001	16.0834	59.1698	37.7131	51.434	71.2415	28.843	37.7786	67.8114	28.8788	54.7049
ENSG00000073008.15|PVR	144.831	126.345	136.125	133.103	146.957	147.713	142.468	143.285	113.761	125.347	109.33	129.25	165.281	192.463	193.07	215.418
ENSG00000073050.12|XRCC1	18.0522	21.9304	23.2148	18.7371	23.6167	21.6983	20.7273	23.8713	23.2439	23.3292	19.495	20.7359	19.7376	21.5396	17.3159	20.8693
ENSG00000073060.17|SCARB1	25.5684	20.6122	24.481	23.126	34.4006	25.7169	28.2684	25.0837	37.7288	46.5316	37.253	43.0667	43.7221	56.1178	43.0696	41.7038
ENSG00000073067.14|CYP2W1	0	0	0	0	0	0	0	0	0	0	0	0	0	0.070592	0	0
ENSG00000073111.14|MCM2	6.03642	7.051	5.34525	5.35904	8.37867	7.12682	7.6564	7.78192	32.7202	28.0505	34.0945	31.9807	19.9555	24.0589	14.2489	16.793
ENSG00000073146.16|MOV10L1	29.8101	25.9952	30.9697	33.2263	30.8104	29.3142	27.4988	32.0255	22.1859	36.2575	17.0722	21.6178	28.0758	29.7738	42.2325	45.9584
ENSG00000073150.14|PANX2	18.635	18.3237	18.6877	14.7696	15.9397	15.735	18.6275	18.0921	10.2372	8.36872	9.07486	8.83193	8.25921	8.39637	7.51799	9.45227
ENSG00000073169.14|SELENOO	35.4111	28.3908	30.5295	32.7724	32.3213	36.3771	39.3136	37.9588	20.0739	25.7151	18.1817	21.9902	18.0817	21.864	24.9662	26.8616
ENSG00000073282.14|TP63	0.058255	0.015919	0	0	0	0	0	0	0	0	0	0	0	0	0	0
ENSG00000073331.18|ALPK1	15.7216	11.4556	12.5064	11.1005	12.0242	12.8882	11.8416	12.4142	8.26054	7.90812	7.22103	7.82678	8.4903	9.51568	8.28161	10.209
ENSG00000073350.14|LLGL2	0.30239	0.699882	2.92746	0.85341	0	1.01783	0.672048	0.465873	2.23395	4.93103	3.20135	2.28794	2.4425	2.25863	3.64458	1.4494
ENSG00000073417.15|PDE8A	36.9957	29.9973	30.3935	38.0795	40.4632	33.3901	35.1356	34.3598	21.3613	26.394	18.6362	18.214	22.9742	24.9083	23.1062	32.4299
ENSG00000073464.13|CLCN4	6.52435	3.76491	4.58163	4.89573	6.89773	5.44426	4.52541	4.96024	8.18038	8.13792	7.97482	6.71843	10.3611	11.1654	8.82613	9.9656
ENSG00000073536.18|NLE1	5.73214	4.98316	5.96104	6.62198	4.75878	6.45618	6.81928	5.62715	8.46752	9.79037	8.78507	8.67424	7.31295	9.26445	8.79663	9.41915
ENSG00000073578.17|SDHA	125.498	110.457	127.357	122.099	125.371	111.435	128.149	120.743	109.14	87.3554	104.411	97.3265	109.575	104.299	102.758	96.3697
ENSG00000073584.20|SMARCE1	43.0069	41.5657	43.9563	47.2291	49.6792	40.2189	48.0963	48.1495	49.4025	49.0745	43.3731	42.6219	46.6739	41.7634	38.5666	43.1268
ENSG00000073598.6|FNDC8	0	0	0	0	0	0	0	0	0	0	0.073707	0	0	0	0	0
ENSG00000073605.19|GSDMB	16.9971	12.6201	17.3315	21.9703	23.481	20.7281	23.3247	18.2332	2.89183	6.95786	1.05884	3.40771	4.81978	3.46824	5.3838	5.21793
ENSG00000073614.13|KDM5A	23.1538	21.797	25.6045	23.8324	25.9411	22.3672	23.6233	25.9767	23.0132	18.9711	20.2018	16.7837	28.5108	22.9651	21.433	26.1965
ENSG00000073670.14|ADAM11	0.486952	0.315193	0.216502	0.120106	0	0.31715	0.0872	0.337545	0.079785	0.115689	0	0.294799	0	0.302746	0.241377	0.278576
ENSG00000073711.11|PPP2R3A	4.73254	4.67851	3.3656	5.13261	4.59815	4.64793	5.45617	5.70288	3.17198	3.29144	3.49156	3.23816	4.13097	3.8167	3.47862	4.36635
ENSG00000073712.15|FERMT2	69.7982	65.979	66.6191	68.5347	78.0005	76.8052	76.5693	76.8781	79.5614	78.1673	76.1297	79.4672	89.0731	95.8926	91.8934	104.652
ENSG00000073734.10|ABCB11	0	0	0.050088	0.070969	0	0	0.173981	0.160047	0.308337	0.045447	0	0.127308	0.169019	0.179438	0.181179	0.074638
ENSG00000073737.17|DHRS9	0.057929	0	0.284749	0	0	0.164806	0	0	0	0.202129	0.152653	0.372464	0	0	0	0.237077
ENSG00000073754.6|CD5L	0	0	0	0	0	0	0	0	0	0	0	0	0	0	0	0
ENSG00000073756.13|PTGS2	19.0099	19.7346	16.0936	18.2324	24.7216	20.5533	21.5613	24.158	43.4249	43.2122	56.4018	49.5247	91.7568	92.0319	95.0008	119.432
ENSG00000073792.16|IGF2BP2	92.7143	94.3359	92.8831	102.027	96.1086	90.1941	102.25	89.8983	64.6193	68.2985	67.6584	67.8576	79.4671	81.5754	79.2802	95.9174
ENSG00000073803.14|MAP3K13	13.2901	17.9126	14.6438	20.2359	19.0458	18.6314	16.1737	16.1242	21.4852	20.4202	22.9966	18.6005	20.3155	22.7798	20.6403	22.9567
ENSG00000073849.16|ST6GAL1	134.091	131.698	117.786	122.777	135.997	136.965	127.487	131.554	68.1598	79.2027	66.3	69.2323	78.0213	79.3399	86.1156	93.1221
ENSG00000073861.3|TBX21	0.59746	0.232787	0	0.189028	0	0.277073	0.403117	0.130592	0	0	0	0	0.065327	0.064205	0	0
ENSG00000073905.8|VDAC1P1	1.35025	0.416829	0.653308	0.700603	0.71928	0.650633	0.62195	0.874184	1.18518	1.04817	1.68229	1.67327	1.65081	1.79271	1.24397	1.39703
ENSG00000073910.23|FRY	3.2485	4.63992	3.05266	3.12663	2.57618	3.09924	2.80553	3.61132	2.7278	2.77887	3.32363	3.22157	2.17053	2.35467	2.30445	2.95872
ENSG00000073921.18|PICALM	139.853	128.393	133.366	154.581	153.534	150.093	148.25	147.451	161.713	173.086	163.53	164.3	192.26	203.885	202.925	233.993
ENSG00000073969.18|NSF	17.2743	16.0628	17.5382	18.1525	15.8986	16.308	16.256	21.1163	26.4603	25.2296	26.5823	23.9355	23.8712	25.3352	24.1291	24.0058
ENSG00000074047.22|GLI2	0.097689	0.039945	0.176222	0.15155	0.331369	0.173324	0.212889	0.182821	0.45047	0.998571	0.33675	0.346781	0.886023	0.516256	0.963251	1.19338
ENSG00000074054.20|CLASP1	18.1624	13.8362	18.2377	16.7125	16.4417	13.2795	15.2098	15.4181	19.1907	20.6132	14.6035	15.5942	24.7961	25.6231	23.2179	26.0763
ENSG00000074071.15|MRPS34	68.4364	62.1403	67.7799	60.9646	58.9699	73.7156	67.2307	74.8214	125.012	130.298	113.837	130.544	99.04	108.557	100.987	101.986
ENSG00000074181.9|NOTCH3	0.418646	0.347917	0.432629	0.216757	0	0.603411	0.318291	0.491079	0.362532	0.596198	0.176885	0.310411	0.745948	0.78609	0.594408	0.614701
ENSG00000074201.9|CLNS1A	39.5283	40.3185	38.4863	49.3088	34.2472	41.9945	36.9982	36.1086	52.5092	46.4285	45.0545	41.1841	39.6637	36.7449	35.6819	37.8469
ENSG00000074211.14|PPP2R2C	0.184345	0.271677	0	0	0	0.098962	0.322349	0.116798	0	0	0	0	0	0	0	0
ENSG00000074219.14|TEAD2	41.9144	38.4796	39.6245	36.6352	47.0252	45.0555	41.1684	39.0837	45.3303	46.6941	42.9368	46.5607	48.9264	50.9369	49.3816	52.9973
ENSG00000074266.22|EED	16.5815	16.7034	20.2482	21.0352	21.3452	22.3529	20.6265	20.2222	25.5121	27.1318	22.031	24.2853	21.4252	25.398	26.2713	22.8013
ENSG00000074276.10|CDHR2	0.146519	0.043681	0.069096	0.058481	0	0.047438	0	0	0.001712	0.014432	0.099982	0	0	0	0.040384	0
ENSG00000074317.11|SNCB	0.351564	1.75948	0.798423	0.929634	1.91988	0.744602	3.1608	2.24236	0	0	0	0.07288	0	0	0.089301	0.216966
ENSG00000074319.13|TSG101	55.7281	55.969	63.5223	59.4352	55.978	57.4496	60.9141	58.4738	47.7466	54.6634	43.6963	45.9395	48.3122	53.0793	46.6798	43.1297
ENSG00000074356.17|NCBP3	30.3088	23.5996	28.3195	31.7006	34.0502	30.4195	29.9971	31.3152	13.3371	20.2457	10.1721	12.7296	13.1173	16.5373	16.7599	19.8286
ENSG00000074370.18|ATP2A3	1.73893	2.19691	2.03105	1.58879	1.70223	1.70012	1.82255	2.99038	0.569133	0.523054	0.648085	0.485981	1.17275	0.663075	0.734475	0.794405
ENSG00000074410.14|CA12	0.606012	0.353604	0.528735	0.816007	0.413738	0.745954	0.500736	0.745182	1.9667	1.95549	2.09102	3.20008	4.3823	5.24364	4.73577	5.44495
ENSG00000074416.15|MGLL	92.3872	95.1814	90.5344	84.1418	96.6012	90.2541	91.1666	92.3705	84.673	73.8469	86.1875	73.0433	74.4775	79.0695	63.1119	74.3876
ENSG00000074527.13|NTN4	159.542	144.332	148.433	153.934	179.078	171.271	165.006	170.88	36.5757	35.0388	34.6395	37.854	44.2011	43.3594	42.3748	48.5078
ENSG00000074582.15|BCS1L	26.497	32.1	43.6851	31.401	30.7506	41.3717	40.0155	38.7341	37.4389	37.3346	30.8509	40.2116	27.0124	31.0726	31.9409	33.9829
ENSG00000074590.14|NUAK1	57.5899	57.0544	59.4772	63.2876	66.9887	65.329	64.0417	66.2176	83.2751	71.9426	74.6721	70.4091	86.8838	91.4857	74.2846	86.9476
ENSG00000074603.19|DPP8	18.6035	16.2928	17.9833	19.7129	20.3607	21.0818	24.0671	21.2622	19.1456	23.0318	19.8384	17.671	20.9362	18.6009	22.2853	24.0226
ENSG00000074621.14|SLC24A1	9.81315	13.4421	6.48764	10.6319	6.72658	9.02503	6.60549	6.49964	6.98827	6.43241	7.95741	5.85905	4.99824	6.31549	6.24941	5.81443
ENSG00000074657.14|ZNF532	28.0644	22.7965	28.055	30.6833	30.2127	27.0583	27.1253	30.1817	20.3667	28.8654	19.5659	19.4227	30.4408	30.0024	26.2514	41.2347
ENSG00000074660.16|SCARF1	67.8402	59.8526	65.7119	56.9454	61.4354	66.0199	66.2385	77.7031	46.8664	56.2256	48.3127	46.2646	45.5559	46.6494	42.7583	48.3676
ENSG00000074695.6|LMAN1	70.7618	65.1294	70.9519	76.3789	76.7403	75.4744	71.7616	77.5705	63.3706	59.2898	69.9471	67.0494	85.1979	84.5581	71.6608	87.5923
ENSG00000074696.13|HACD3	82.1936	72.1862	72.138	74.7582	83.6297	78.9706	78.3462	81.3091	53.6772	55.8814	50.4353	50.993	48.4853	57.6246	51.5738	56.7744
ENSG00000074706.13|IPCEF1	0	0.074627	1.04397	0.130682	0.499983	0.123867	0.037711	0.045555	0	0	0.124696	0.037799	0.024977	0.049463	0.419998	0
ENSG00000074755.15|ZZEF1	28.0246	27.6486	33.4896	34.5513	28.3945	33.0472	31.6557	33.1474	27.8142	28.2431	22.5027	24.5202	29.7474	31.9143	26.81	35.8257
ENSG00000074771.4|NOX3	0	0	0	0	0	0	0	0	0	0	0	0	0	0	0	0
ENSG00000074800.16|ENO1	1174.12	1139.27	1156.31	1092.35	1184.31	1171.9	1162.68	1186.14	1515.61	1317.19	1633.45	1599.7	1693.92	1724.4	1599.73	1624.97
ENSG00000074803.20|SLC12A1	0	0	0.016222	0	0	0	0	0	0	0	0.013482	0	0	0.019021	0.039905	0
ENSG00000074842.8|MYDGF	285.316	298.316	289.311	276.204	285.637	315.277	305.193	288.962	262.244	229.877	262.289	295.14	257.856	270.384	306.254	267.036
ENSG00000074855.11|ANO8	11.689	7.19581	10.6198	9.82533	10.8838	11.222	12.4544	11.7589	3.36642	4.60489	2.46238	2.71994	4.14113	4.49419	5.08008	6.33631
ENSG00000074935.14|TUBE1	32.4308	27.7832	26.4889	36.0543	26.6934	34.3183	35.0451	34.3116	10.0976	13.9611	8.53158	8.99336	9.84731	9.21411	8.92908	8.93593
ENSG00000074964.17|ARHGEF10L	1.75894	1.75653	1.54729	1.18314	2.04952	1.70256	2.95126	3.03221	0.60845	0.884006	0.657398	1.05893	0.93544	1.14688	1.33354	1.84867
ENSG00000074966.11|TXK	0	0	0	0	0	0	0.039902	0	0.141156	0	0	0	0	0	0	0
ENSG00000075035.10|WSCD2	0	0	0	0	0	0	0	0.074025	0	0	0	0	0	0	0	0
ENSG00000075043.20|KCNQ2	0.062604	0	0.259103	0	0	0	0	0	0	0	0	0	0	0	0	0
ENSG00000075073.15|TACR2	0.480518	0.704994	0	0.255968	0.496615	0.155483	0.093839	0.593964	0	0	0.076854	0.212829	0	0.251628	1.06989	0.410201
ENSG00000075089.10|ACTR6	14.073	13.1122	12.4746	14.4419	13.5486	18.054	17.5198	19.0459	12.7697	16.4653	15.8584	16.42	14.3272	12.9319	13.5237	18.2639
ENSG00000075131.10|TIPIN	3.81672	8.08698	3.57888	7.81464	3.42074	5.2868	7.5887	6.66493	16.3848	15.8248	13.669	19.3003	15.9534	11.7742	11.7259	15.9429
ENSG00000075142.14|SRI	64.0529	75.3391	68.6946	88.3208	81.6352	74.556	90.5766	75.9886	79.6333	84.659	78.0918	84.4374	85.5012	79.648	83.071	80.9566
ENSG00000075151.23|EIF4G3	51.067	48.5206	49.8404	53.558	62.035	51.0844	54.4868	54.5557	43.9372	52.4589	38.8671	40.1186	47.8019	53.1213	52.8886	57.2467
ENSG00000075188.9|NUP37	14.4936	13.7546	14.3983	13.3322	17.768	16.7977	17.4617	12.0566	32.4875	31.681	19.6821	26.5286	19.048	16.7202	22.5553	17.0213
ENSG00000075213.11|SEMA3A	1.47874	1.62772	0.796961	2.02838	2.09531	1.26983	0.972561	1.13266	0	0.074118	0.135186	0.076238	0.073206	0	0	0
ENSG00000075218.19|GTSE1	0.57571	0.300456	0.559603	0.478882	0.915164	0.972628	0.69891	0.65719	14.147	13.0058	12.7881	11.6923	8.69218	11.1191	4.50531	5.2435
ENSG00000075223.14|SEMA3C	2.0791	2.18117	1.99703	1.46956	1.89317	1.51949	2.85865	1.46147	1.93182	1.91052	2.76866	1.65518	2.41411	2.62343	2.51751	3.10909
ENSG00000075234.17|TTC38	17.952	20.3048	18.6769	18.5549	21.0217	20.2489	23.1254	23.1383	20.5971	22.2103	21.8372	23.1249	22.2904	22.7211	20.9547	24.0405
ENSG00000075239.14|ACAT1	62.188	60.5739	63.472	68.5156	68.0114	64.0806	71.6822	67.0407	76.5942	74.908	79.517	81.18	73.7989	77.1052	80.229	72.187
ENSG00000075240.17|GRAMD4	23.581	16.973	19.8608	19.6893	21.4929	24.9481	20.3767	24.3237	10.1683	13.7202	10.3388	11.6429	13.2795	14.4033	11.5674	15.7223
ENSG00000075275.18|CELSR1	7.40596	5.01745	5.82042	8.81892	5.59148	7.28759	12.3095	8.31252	0.582787	0.706438	0.464702	0.87089	0.847947	0.65775	0.770224	0.623135
ENSG00000075290.8|WNT8B	0	0	0	0	0	0	0	0	0	0	0	0	0	0	0	0
ENSG00000075292.19|ZNF638	74.2301	54.2643	49.1336	61.2713	65.2666	62.4959	72.4305	65.2518	32.9372	41.7604	33.9945	38.4345	34.1164	34.7955	37.8877	47.6374
ENSG00000075303.13|SLC25A40	8.66465	7.86853	5.59322	10.6955	9.16724	7.91839	7.77395	8.96264	7.12646	8.06804	6.16205	6.1256	7.28064	6.86657	6.27233	7.18173
ENSG00000075336.12|TIMM21	12.9107	8.72945	6.05234	11.0814	13.468	9.68979	10.5002	8.98184	15.9596	15.1526	11.4517	13.1827	13.9406	12.7361	11.1933	13.1841
ENSG00000075340.23|ADD2	0.40708	0.183182	0.229667	0.115861	0.917031	0.10632	0.470042	0.055071	0.099479	0.085035	0	0.150153	0.05404	0.051601	0	0
ENSG00000075388.4|FGF4	0	0	0	0	0	0	0	0.040016	0	0.06841	0	0	0	0	0	0
ENSG00000075391.17|RASAL2	11.7032	8.7965	10.1166	10.068	9.61274	11.5074	10.8724	12.6597	7.55761	7.98347	7.58186	5.72501	7.94883	7.7715	7.37916	9.11809
ENSG00000075399.14|VPS9D1	22.3884	17.7018	20.0717	23.9193	24.3412	26.4129	27.195	25.2625	9.32999	13.765	8.73926	9.52552	10.4285	10.3454	10.649	10.9684
ENSG00000075407.18|ZNF37A	10.9488	9.76912	11.3812	12.7034	11.9366	11.5368	11.4685	12.394	6.98411	8.63033	7.43461	7.43292	9.73594	9.49284	9.59126	8.98701
ENSG00000075413.19|MARK3	77.8309	73.4307	67.8705	81.779	75.071	69.9563	76.3266	76.1022	49.063	69.5438	40.6748	47.8135	44.3793	47.4516	55.6268	53.4589
ENSG00000075415.15|SLC25A3	139.849	154.762	147.55	170.928	175.191	154.59	218.505	159.262	197.899	239.546	194.902	191.256	153.664	175.039	207.065	230.163
ENSG00000075420.13|FNDC3B	121.988	122.555	120.101	128.649	143.624	134.287	123.963	132.094	128.39	136.25	132.565	114.504	199.864	200.021	184.367	222.387
ENSG00000075426.12|FOSL2	64.8748	59.7758	62.6038	64.7436	72.6563	66.4439	67.4065	68.5104	58.5251	53.4591	45.5229	49.8746	73.0362	78.1432	69.9975	79.027
ENSG00000075429.9|CACNG5	0	0	0	0.036304	0.022214	0	0	0	0	0.141079	0	0	0	0	0	0
ENSG00000075461.6|CACNG4	0	0	0	0.143593	0	0	0	0	0	0	0	0	0.047094	0	0	0
ENSG00000075539.15|FRYL	21.3248	17.618	17.9363	23.4551	23.6907	20.9239	19.9763	22.5115	19.7164	18.862	18.5661	13.8146	23.4016	22.8804	18.4568	26.6115
ENSG00000075568.17|TMEM131	24.0134	24.3215	27.454	29.5397	29.0769	29.1537	29.9433	30.3673	24.1513	23.6661	22.0583	20.7951	28.6854	29.3557	24.7548	29.4659
ENSG00000075618.18|FSCN1	263.36	238.785	240.817	211.943	266.221	268.708	280.922	279.234	191.766	179.84	196.913	189.225	194.908	207.386	181.327	202.373
ENSG00000075624.17|ACTB	3485.82	3247.2	3061.97	3129.53	3999.78	3544.41	4156.61	3902.37	5619.83	4900.32	6102.7	6063.74	5286.7	5687.22	4486.46	5409.13
ENSG00000075643.6|MOCOS	1.61124	1.20204	1.63563	1.04964	2.59823	1.3541	1.60189	1.52052	1.89546	2.20346	2.06592	1.91635	1.49217	1.40254	1.70145	1.54036
ENSG00000075651.16|PLD1	45.4644	47.6169	47.5389	55.6734	52.0664	48.8416	45.6918	52.7624	40.1124	53.937	41.755	44.1628	48.9251	52.8613	56.8804	67.0172
ENSG00000075673.12|ATP12A	0	0	0	0	0	0	0	0	0	0	0	0	0	0	0	0
ENSG00000075702.19|WDR62	0.553035	0.492937	0.171154	0.488601	1.21307	0.599872	0.829702	0.557845	6.65494	5.41243	4.53205	4.50394	2.56943	5.02512	1.78391	1.83745
ENSG00000075711.21|DLG1	83.8884	81.3336	83.7597	96.4243	90.0134	86.2518	86.483	85.5556	24.5344	32.0004	24.4946	23.1831	25.1816	28.6872	29.8946	33.8591
ENSG00000075785.14|RAB7A	287.404	283.3	279.928	293.62	282.381	313.706	301.866	314.301	319.761	327.674	341.871	323.904	332.9	339.14	306.558	350.051
ENSG00000075790.12|BCAP29	52.9125	35.9645	51.1379	64.2303	105.497	40.862	40.8198	44.6488	25.9284	37.5637	23.3983	26.4814	51.6112	56.8263	40.0991	38.9176
ENSG00000075826.17|SEC31B	13.3727	14.5601	18.796	17.1366	19.0963	19.4827	27.7402	19.3733	2.67025	8.13269	1.39357	2.95644	2.8183	3.20423	6.96303	6.90541
ENSG00000075856.12|SART3	37.2539	35.9248	33.535	37.1911	41.1509	41.4564	43.4674	39.7	35.656	35.8854	29.4952	33.1212	31.3592	32.9253	27.2198	29.9676
ENSG00000075884.14|ARHGAP15	0	0	0	0	0.132745	0	0	0	0	0	0	0.064977	0	0	0	0.271417
ENSG00000075886.11|TUBA3D	0	0	0	0	0	0	0	0	0	0	0	0	0	0	0	0
ENSG00000075891.23|PAX2	0	0	0	0	0	0	0	0	0	0	0	0	0.040282	0	0	0
ENSG00000075914.13|EXOSC7	35.9015	37.4709	37.1224	34.7499	36.592	38.7588	40.4903	47.9395	38.6317	42.5427	34.9787	38.2836	38.3655	32.8244	44.6585	41.0997
ENSG00000075945.13|KIFAP3	24.2815	21.4704	20.5989	24.3261	20.2491	22.4759	22.8992	23.9982	20.4082	17.4751	19.5101	18.9937	20.8374	17.8141	19.6473	21.4994
ENSG00000075975.17|MKRN2	27.2335	28.8618	23.7524	32.2848	31.7091	34.1594	29.3543	33.739	25.5785	27.9016	28.9959	27.0833	28.2529	28.0074	31.6686	30.687
ENSG00000076003.5|MCM6	5.38944	5.51233	5.63798	6.67167	6.69318	6.06996	6.25333	6.17748	24.5278	24.0249	26.8347	26.2517	21.146	18.7155	15.4751	17.515
ENSG00000076043.11|REXO2	179.93	184.862	177.43	195.143	198	207.677	201.001	184.496	188.255	195.82	178.249	189.241	193.125	190.431	215.503	205.776
ENSG00000076053.12|RBM7	11.8861	10.3383	8.33711	10.4482	9.09493	10.9572	13.2768	11.4841	13.0959	13.0974	15.5409	12.1489	16.4218	13.3846	13.4621	13.7441
ENSG00000076067.13|RBMS2	31.2032	27.6014	35.9207	33.198	37.0752	33.3079	31.9891	33.5085	36.6609	33.0605	37.5793	33.4643	41.923	40.4631	33.3604	41.9308
ENSG00000076108.12|BAZ2A	62.6954	57.52	66.2321	68.4416	68.7386	64.065	74.0602	67.4075	38.7472	43.0371	37.2483	36.5099	49.5244	54.6878	50.2083	59.0848
ENSG00000076201.16|PTPN23	56.3682	47.8543	51.7656	51.2827	56.2821	51.9671	69.4274	61.4258	52.6404	55.6362	52.2581	49.4224	46.2393	49.6192	46.8864	52.0726
ENSG00000076242.16|MLH1	21.5419	21.9557	20.2923	17.6944	17.6867	20.4808	22.9129	23.5605	30.2969	33.9318	28.9697	28.6219	30.1043	32.1506	23.2482	30.357
ENSG00000076248.11|UNG	18.7511	23.7934	24.3771	23.0141	21.4381	22.799	19.3642	19.9625	38.2497	33.1594	30.6053	31.3644	25.1103	31.4658	22.033	26.4005
ENSG00000076258.10|FMO4	1.95306	1.21391	2.51916	2.16102	1.84508	2.09158	2.426	2.96461	1.23919	2.05206	1.19948	1.46033	1.54408	1.84098	1.51202	1.04322
ENSG00000076321.11|KLHL20	23.1062	22.2756	19.4275	25.1388	27.8019	22.682	28.1249	26.1044	15.3884	15.0742	15.0233	15.8215	18.9377	17.8856	16.8813	21.0494
ENSG00000076344.16|RGS11	24.2928	22.1074	27.4117	27.238	23.8059	29.4405	37.1173	34.6791	4.42156	5.91039	3.15963	5.91518	4.39647	5.42792	4.96512	9.62945
ENSG00000076351.13|SLC46A1	2.32767	1.04344	1.16742	1.57231	2.57463	1.818	1.49928	2.63477	3.66192	4.63179	3.11472	2.91933	2.98014	2.33247	3.01255	2.82981
ENSG00000076356.7|PLXNA2	93.3821	90.1249	123.31	120.61	124.101	116.916	113.103	112.418	148.576	141.615	120.353	123.065	186.962	203.802	164.027	210.986
ENSG00000076382.17|SPAG5	1.65095	4.24608	4.73466	3.70491	3.11657	3.93106	4.23776	2.3885	11.3923	11.8232	9.20038	10.242	7.40598	7.39314	3.65514	4.3923
ENSG00000076513.17|ANKRD13A	24.8132	23.9674	26.9038	27.4287	39.8532	28.006	29.0933	29.1168	18.0148	20.2599	19.3501	19.6752	19.741	19.0714	18.0882	20.2785
ENSG00000076554.16|TPD52	1.72427	2.17009	1.76731	0.749283	1.14186	1.87289	0.763162	1.72527	3.88119	3.73581	2.98096	4.08304	3.31453	3.84447	3.27498	2.59079
ENSG00000076555.15|ACACB	0.916657	0.637438	1.44857	1.54727	2.26177	1.20208	1.28863	0.446862	1.93596	1.36354	0.883027	0.951723	1.9747	1.21576	0.886772	1.30645
ENSG00000076604.15|TRAF4	56.6243	51.5083	56.4668	67.3565	41.0769	48.5493	55.1355	51.3199	17.8984	28.7489	20.7168	26.8055	22.9071	29.4605	26.6921	33.8635
ENSG00000076641.4|PAG1	0.247198	0.403702	0.287037	0.171187	0.164609	0.299276	0.198215	0.244282	0.027167	0.030827	0.016957	0.063023	0.087857	0.098912	0.04821	0
ENSG00000076650.7|GPATCH1	6.54017	6.69971	6.15308	7.52852	7.5283	6.94014	9.12644	7.6967	7.2601	8.37621	7.03226	7.05342	5.93168	7.23359	6.01816	7.98524
ENSG00000076662.10|ICAM3	3.24846	3.25415	2.17523	3.57668	4.20071	3.60251	2.43329	4.21466	7.36224	13.1935	7.70712	6.544	5.14997	6.08342	5.96409	4.31602
ENSG00000076685.19|NT5C2	51.5472	44.8841	49.4966	47.0559	43.2385	50.2966	49.7559	53.5781	31.1016	37.1652	28.6054	31.3978	31.8023	34.2039	31.9191	33.5338
ENSG00000076706.17|MCAM	1284.71	1191.52	1265.09	1201.14	1487.41	1463.68	1528.93	1471.92	869.119	888.415	850.069	923.653	912.519	983.474	846.875	936.427
ENSG00000076716.9|GPC4	0	0	0.027959	0	0	0.076879	0	0	0	0	0	0	0	0	0	0
ENSG00000076770.15|MBNL3	0.228412	0.315282	0.260679	0.365163	0.395405	0.354703	0.224528	0.497672	0.888219	0.769008	0.968661	0.882217	1.49817	0.978947	0.93423	0.885183
ENSG00000076826.10|CAMSAP3	0.294707	0.785938	0.353167	0.235357	0.282135	0.418659	0.359414	0.296302	0.185209	0.437059	0.162213	0.156316	0.133326	0.102074	0.195122	0
ENSG00000076864.20|RAP1GAP	0	0.168763	0	0.349063	0	0.24394	0.088411	0.144408	0	0	0.101297	0.188772	0.240527	0.429847	0.116844	0
ENSG00000076924.12|XAB2	42.2226	36.0399	38.3169	41.6737	38.1898	41.6303	38.4113	43.0089	47.6419	41.0444	54.4811	41.5183	40.6259	41.8895	37.074	38.1278
ENSG00000076928.18|ARHGEF1	110.062	84.7943	112.33	103.297	108.053	114.305	124.313	116.995	76.6717	89.346	70.6913	77.45	71.0548	76.0791	77.153	88.1122
ENSG00000076944.16|STXBP2	97.7854	86.5153	107.829	99.2881	103.776	96.5034	117.643	107.107	92.6787	112.916	107.593	97.6546	82.5751	86.7665	111.535	107.877
ENSG00000076984.18|MAP2K7	28.8529	29.359	27.7946	29.5195	31.9884	33.5702	31.6933	34.4489	24.3107	22.9279	20.6108	22.7467	21.047	21.2666	23.1724	25.1782
ENSG00000077009.13|NMRK2	0	0	0	0	0	0	0	0	0	0	0	0	0	0	0	0
ENSG00000077044.11|DGKD	12.1533	13.7358	12.8382	15.3572	12.1842	16.2482	13.9436	15.9698	5.41635	7.98377	4.13524	6.57002	5.3311	7.13246	7.60629	8.63839
ENSG00000077063.11|CTTNBP2	0.016867	0.085511	0	0.139928	2.03264	0	0.266926	0.021239	0	0	0	0	0	0	0	0
ENSG00000077080.10|ACTL6B	0	0	0	0	0	0	0	0	0	0	0	0	0	0	0	0
ENSG00000077092.19|RARB	15.0853	15.7709	17.3406	17.8609	15.5419	17.4931	16.6077	17.0837	2.47544	1.77808	1.94795	1.44975	1.6256	2.14537	2.67844	3.71138
ENSG00000077097.16|TOP2B	40.0251	37.7812	47.7792	45.4003	47.5944	47.6296	51.1577	52.5653	42.2638	39.9088	41.3383	41.6257	45.2654	47.049	43.7098	53.0231
ENSG00000077147.16|TM9SF3	74.7139	68.9146	69.8188	88.238	86.8419	96.4037	88.9179	93.7321	100.373	101.113	99.7637	101.645	122.945	124.572	115.729	130.606
ENSG00000077150.20|NFKB2	76.0695	69.5106	84.0014	73.5585	93.061	87.4804	95.5358	89.1635	54.4288	63.2408	52.2769	54.0448	56.219	62.3026	63.1571	63.7884
ENSG00000077152.11|UBE2T	5.66758	3.71482	3.19152	2.60302	4.17141	6.30021	2.6962	8.40982	18.4405	19.221	19.3265	25.7952	14.8994	16.3623	12.9028	9.81351
ENSG00000077157.22|PPP1R12B	4.58739	4.08559	3.95034	6.73957	4.60083	3.75146	3.79874	3.80804	2.14713	3.48509	1.13424	1.72354	2.50963	2.18316	3.38503	5.12493
ENSG00000077232.19|DNAJC10	21.2688	20.6475	22.2646	25.3022	26.6946	23.9815	24.4543	24.008	17.2718	21.8548	20.5705	19.2609	22.2488	22.9471	20.6418	27.2379
ENSG00000077235.18|GTF3C1	47.7375	44.925	53.8183	51.2858	48.6877	53.0974	52.5624	50.1976	43.9759	38.7807	39.0113	39.9731	43.8067	48.2625	38.3993	44.8234
ENSG00000077238.14|IL4R	104.889	111.62	102.923	96.8262	107.025	109.061	96.5079	113.813	70.0183	79.9506	62.2444	75.8719	74.173	69.0102	72.8156	98.07
ENSG00000077254.14|USP33	34.4207	35.2705	32.3719	46.953	40.5407	39.8688	36.2883	41.3155	23.172	30.7493	25.2307	25.2027	29.9102	35.211	32.7053	36.5832
ENSG00000077264.16|PAK3	0	0	0.105815	0	0	0	0	0	0	0	0	0	0	0	0	0.061208
ENSG00000077274.9|CAPN6	0	0	0	0	0	0	0	0	0	0	0	0	0	0	0	0
ENSG00000077279.20|DCX	0	0	0.02948	0	0.098899	0	0	0	0	0	0	0	0	0	0	0
ENSG00000077312.9|SNRPA	29.213	34.0539	36.6902	32.9725	49.7561	37.166	33.8064	39.0328	73.9607	79.0391	76.9672	78.9143	66.6683	67.0755	60.7663	65.2858
ENSG00000077327.16|SPAG6	0	0	0	0	0	0	0.097737	0	0	0	0	0	0	0	0	0
ENSG00000077348.9|EXOSC5	16.4531	24.0859	13.0521	15.1839	14.8253	14.4032	17.953	22.3641	19.0709	20.5877	18.168	18.4731	14.7507	14.49	19.3177	18.3245
ENSG00000077380.16|DYNC1I2	102.412	116.099	100.413	130.633	117.564	115.254	116.508	122.358	126.703	122.906	126.913	124.763	140.751	132.148	130.29	142.194
ENSG00000077420.16|APBB1IP	0	0	0	0	0	0	0	0	0	0.283376	0	0	0	0	0	0.076039
ENSG00000077454.16|LRCH4	42.7288	41.9731	52.9698	43.0735	49.412	58.0457	56.3422	62.0097	22.44	34.2037	22.2294	23.8494	22.3187	27.5765	26.6536	27.1509
ENSG00000077458.13|FAM76B	12.9299	12.5915	10.9016	15.6075	14.1846	16.5368	17.4147	16.1463	4.74424	7.86983	5.43022	5.70885	5.9487	8.63291	8.9062	6.42865
ENSG00000077463.15|SIRT6	44.0032	35.0727	35.623	32.0548	42.8125	41.5006	42.3063	46.0999	35.2155	43.7017	38.1551	28.69	27.0801	34.8149	35.9708	36.1047
ENSG00000077498.9|TYR	0	0	0	0	0	0	0	0	0	0	0	0	0	0	0	0
ENSG00000077514.9|POLD3	8.29489	5.62256	7.22501	9.29098	7.61381	7.89465	8.16042	9.45182	9.90468	11.5403	9.12025	10.4093	9.19488	9.44339	5.93553	7.80041
ENSG00000077522.15|ACTN2	2.40933	2.37561	2.47955	3.52846	2.15464	3.06855	4.68484	4.63371	1.39419	2.75113	0.925218	1.69159	1.31625	1.93479	2.53565	3.31089
ENSG00000077549.19|CAPZB	138.429	169.658	154.927	133.392	200.799	149.954	176.429	175.318	290.714	220.941	251.576	224.687	241.031	242.843	260.803	226.468
ENSG00000077585.14|GPR137B	28.0572	25.2354	21.0611	27.1083	22.2069	24.1558	28.6044	27.7093	13.1446	14.8269	12.0669	12.9493	14.2693	15.8658	17.005	17.8045
ENSG00000077616.11|NAALAD2	0	0	0.102542	0	0	0.102191	0	0.145803	0.355445	0.402302	0	0	0	0	0	0
ENSG00000077684.16|JADE1	15.6007	13.3479	14.9076	16.3454	15.4454	15.5143	13.8414	14.9323	15.8774	17.3489	15.7493	15.1786	13.5725	14.1676	12.9148	12.9273
ENSG00000077713.19|SLC25A43	19.2687	20.5448	25.2105	22.199	24.1659	17.9836	21.5223	22.8138	19.9864	22.3655	20.4265	22.0219	21.4401	23.1937	20.1983	23.3875
ENSG00000077721.16|UBE2A	91.0432	73.967	91.9657	86.7427	86.0114	99.2983	93.9538	87.345	96.3369	110.546	88.276	102.373	106.061	98.07	105.393	100.212
ENSG00000077782.22|FGFR1	65.8198	53.4151	56.697	61.6295	69.5287	61.7388	76.438	60.5515	31.8361	34.6447	28.2487	26.217	39.0488	32.7497	27.8554	38.1621
ENSG00000077800.13|FKBP6	0	0	0	0	0	0	0.193048	0	0	0	0	0	0	0	0	0
ENSG00000077935.17|SMC1B	0	0	0	0	0.05912	0	0	0	0	0	0.054199	0	0	0	0	0
ENSG00000077942.19|FBLN1	0	0	0.462925	0	0.433679	0	0	0	0.066058	0	0	0	0	0.068075	0.059454	0
ENSG00000077943.8|ITGA8	0.022105	0.167674	0	0	0.12292	0.189398	0.19332	0	0	0.033072	0.063822	0	0	0	0	0.0922
ENSG00000077984.6|CST7	0	0	0	0	0	0	0	0	0	0	0	0	0	0	0	0
ENSG00000078018.21|MAP2	48.5979	45.9425	45.0754	49.7953	45.7036	50.8312	48.3327	51.2522	19.5629	19.2445	19.5197	15.8813	25.6096	25.833	21.0174	25.6714
ENSG00000078043.16|PIAS2	15.6816	12.2483	12.9278	16.9527	15.5095	16.0209	11.4941	15.6219	8.34627	10.8765	9.52555	8.13213	10.365	10.2513	10.7837	14.8367
ENSG00000078053.17|AMPH	0	0	0.080711	0.119092	0	0	0	0.071233	0.696802	0.533655	0.585387	0.567606	0.410154	0.887017	0.295604	1.04046
ENSG00000078061.14|ARAF	40.4198	41.1533	49.8513	38.2636	46.7547	42.5349	46.9126	49.5513	46.9765	47.9032	47.7511	46.268	44.73	47.3313	35.7377	43.0187
ENSG00000078070.13|MCCC1	17.5627	15.0285	17.9665	21.4722	19.8775	19.2657	17.8271	18.5775	17.7101	16.1106	16.5208	17.4772	13.3522	16.7104	16.3289	15.965
ENSG00000078081.8|LAMP3	8.85765	9.84477	7.05875	9.17301	12.3641	10.8281	8.62459	9.41155	8.4737	9.42461	7.51353	7.92862	9.3768	10.036	7.61674	7.96958
ENSG00000078098.14|FAP	0.529472	0.692028	0.536378	0.124611	1.09939	1.31813	1.22943	0.954242	0	0.344088	0.197735	0.282636	0.314181	0.160977	0.254898	0
ENSG00000078114.19|NEBL	0.9651	1.28293	1.3256	2.20233	1.2392	1.39446	1.32527	0.891479	1.66617	0.811455	1.69777	0.983927	2.02427	1.1672	2.41007	1.17098
ENSG00000078124.13|ACER3	6.41819	6.94842	6.45778	6.84885	7.61214	6.96455	9.11572	6.35283	9.98321	10.5752	8.13461	9.26027	10.2593	9.86733	9.62729	12.6634
ENSG00000078140.14|UBE2K	41.6711	42.6115	36.6946	43.9631	52.8092	43.0812	40.0313	43.1949	37.2873	40.1295	40.5741	39.7769	42.2261	49.2178	46.5645	41.7207
ENSG00000078142.13|PIK3C3	18.1829	15.7973	20.4646	23.2079	21.2645	22.1045	20.6809	19.8443	12.2695	18.7208	15.0355	15.1962	12.9324	14.3819	19.0726	23.7277
ENSG00000078177.14|N4BP2	1.77893	1.59862	0.989596	1.68555	1.39012	1.46452	1.82658	1.72033	1.43656	1.99517	1.55605	1.43277	1.80398	1.34255	1.55302	1.9155
ENSG00000078237.7|TIGAR	24.3394	26.6939	28.4228	32.5434	29.7684	28.8474	29.0558	32.4282	15.8898	15.8725	16.0158	17.4027	17.4038	17.1225	19.9212	19.7184
ENSG00000078246.17|TULP3	18.6824	17.8077	18.5395	17.6542	19.672	20.1314	22.3823	19.5153	13.846	11.9704	13.3879	13.1318	15.8355	15.2769	13.9205	17.526
ENSG00000078269.15|SYNJ2	46.3548	43.6613	47.3966	47.5527	53.1841	46.9429	55.046	50.2353	50.1419	57.483	48.7756	47.7427	49.4182	51.4447	46.4243	52.9806
ENSG00000078295.17|ADCY2	0	0.028769	0	0	0	0	0	0	0	0.038729	0	0	0	0	0	0
ENSG00000078304.19|PPP2R5C	44.7537	46.0397	42.5355	53.684	46.7734	46.6826	51.7797	60.1305	46.0456	51.3417	44.5475	46.5739	50.524	51.2451	49.8726	60.2026
ENSG00000078319.10|PMS2P1	15.359	24.9799	33.9681	26.2347	27.4253	28.5918	25.7084	27.5524	37.649	35.9349	30.0474	31.1357	31.7608	29.366	36.008	33.1005
ENSG00000078328.23|RBFOX1	0.057504	0.01626	0.023846	0	0	0	0	0.029231	0.043711	0	0	0	0	0	0	0.274186
ENSG00000078369.18|GNB1	295.372	273.559	286.821	303.941	316.734	307.931	306.267	321.096	354.912	353.642	349.172	346.874	383.762	396.406	352.427	385.899
ENSG00000078399.19|HOXA9	0	0	0	0	0	0	0.069159	0	0.074999	0	0.101095	0	0	0	0	0.097971
ENSG00000078401.7|EDN1	245.024	228.943	235.151	236.401	303.09	277.51	289.897	286.455	402.228	447.947	420.349	460.967	547.246	578.291	523.673	568.14
ENSG00000078403.17|MLLT10	21.541	21.8346	20.5051	25.2892	27.637	22.0589	22.4294	21.2179	17.6141	25.8915	17.7919	16.4555	19.4475	17.9139	19.6878	25.6109
ENSG00000078487.18|ZCWPW1	2.07301	4.15811	5.26847	6.05336	5.90978	3.05694	5.89907	5.34422	2.03594	2.274	1.78398	1.68829	1.27514	2.13727	2.28467	1.74445
ENSG00000078549.15|ADCYAP1R1	0	0	0	0	0.133195	0	0	0	0.188851	0.059252	0	0.062846	0.067315	0	0.025878	0
ENSG00000078579.9|FGF20	0	0	0	0	0	0	0	0	0	0	0.056419	0	0	0	0	0
ENSG00000078589.13|P2RY10	0	0.040725	0	0	0	0	0	0	0	0	0	0	0	0	0	0
ENSG00000078596.11|ITM2A	3.47541	2.98809	3.20961	3.68666	2.94461	3.69256	3.51098	3.09808	12.9332	9.56051	9.81599	11.2539	10.7534	12.092	9.18203	11.096
ENSG00000078618.22|NRDC	90.5384	83.8263	88.9276	97.431	95.4054	98.9895	85.7253	88.3667	90.2102	89.5427	101.364	89.3646	91.3826	94.0214	97.5559	101.658
ENSG00000078668.14|VDAC3	106.546	112.286	92.165	115.336	125.943	114.002	110.505	104.02	125.858	112.261	119.564	120.112	118.412	110.612	112.834	103.013
ENSG00000078674.18|PCM1	55.3933	55.0904	53.4488	59.2757	59.4114	53.6123	56.7838	58.3115	36.9201	41.1484	41.9116	39.4361	42.5017	38.4237	39.9814	49.8702
ENSG00000078687.17|TNRC6C	7.57062	5.67134	8.00875	7.97396	6.84855	6.17852	6.37204	7.641	5.52646	6.41086	4.72882	4.89441	5.49385	7.4183	6.11793	7.76719
ENSG00000078699.22|CBFA2T2	12.8615	12.2153	11.3561	11.4396	13.969	12.9077	13.2775	14.1977	6.91637	9.56707	6.24511	5.37584	7.94444	7.96593	9.37833	9.79849
ENSG00000078725.13|BRINP1	0	0.090339	0	0.110992	0	0.120229	0	0	0.048817	0	0	0	0.205941	0	0.05337	0
ENSG00000078747.16|ITCH	24.4102	28.0317	34.4657	36.6478	30.982	27.3104	28.3197	31.6091	22.6434	24.9984	22.0562	21.5866	29.6158	27.8632	36.2102	35.6703
ENSG00000078795.17|PKD2L2	0	0	0.7542	0	0	0	0	0	0	0	0	0	0	0	0	0
ENSG00000078804.13|TP53INP2	27.3307	24.4609	26.1575	23.6243	31.2223	27.6373	25.4152	27.1541	18.8983	17.4026	17.5905	17.1821	23.6225	25.7965	24.1006	27.8546
ENSG00000078808.19|SDF4	373.541	322.417	322.477	306.805	372.661	372.497	346.216	374.916	249.243	255.096	243.62	258.949	281.382	292.107	265.543	292.83
ENSG00000078814.17|MYH7B	0.112126	0.183745	0.209378	0.105433	0	0.023432	0.161366	0.156938	0.092755	0.147944	0.031034	0.062267	0	0.090009	0	0.098548
ENSG00000078898.7|BPIFB2	0	0	0	0	0	0	0	0	0	0	0	0	0	0	0	0
ENSG00000078900.15|TP73	0	0	0.104129	0	0	0	0	0.055104	0	0	0.00928	0	0.044287	0.023579	0	0
ENSG00000078902.16|TOLLIP	85.1099	82.5483	86.3262	84.604	88.9185	89.4799	88.1616	91.0867	73.6228	71.5121	62.1855	66.7596	75.7919	83.6858	70.5086	84.565
ENSG00000078967.13|UBE2D4	3.63775	6.42893	7.03191	7.5724	6.71111	4.13584	7.21466	6.68498	8.53286	10.9095	6.843	6.08026	4.57116	6.85569	4.30514	8.58496
ENSG00000079101.16|CLUL1	0	0	0	0.201214	0	0	0	0	0.055224	0	0.06422	0	0	0	0	0
ENSG00000079102.16|RUNX1T1	2.43774	1.87353	1.64032	2.59792	3.5806	1.9593	0.922773	2.17107	5.58339	7.85719	6.39623	6.11218	9.2518	7.8357	9.1022	9.99259
ENSG00000079112.10|CDH17	0	0	0	0	0	0	0.034538	0	0	0	0	0	0	0	0.023756	0
ENSG00000079134.12|THOC1	33.1269	28.9213	34.2287	38.4439	37.9126	32.4374	33.885	35.527	16.7974	23.9072	16.1504	20.896	21.1106	15.7675	19.9189	22.2057
ENSG00000079150.18|FKBP7	14.8376	14.5639	11.3579	12.6674	17.7506	15.8274	17.2828	13.6048	6.796	7.30169	7.12795	9.55243	10.8808	8.34756	7.91549	10.2995
ENSG00000079156.17|OSBPL6	2.71057	3.3013	7.3323	8.19017	4.35444	2.2706	3.2555	4.22308	2.33616	5.02097	5.29108	1.83065	2.84299	1.58046	1.4677	2.96645
ENSG00000079215.15|SLC1A3	0.106873	0.372308	0	0.219307	0	0	0.018364	0	0	0	0	0.043578	0.103748	0	0.097646	0.030258
ENSG00000079246.16|XRCC5	149.913	135.393	139.35	142.241	143.025	141.269	151.034	149.512	207.978	186.595	206.983	182.75	194.211	187.715	173.537	192.535
ENSG00000079257.8|LXN	69.2718	68.6512	77.0941	81.3713	93.3704	92.4926	72.7392	79.5214	14.8045	16.5945	10.9045	18.0401	12.211	13.4825	14.8026	15.0205
ENSG00000079263.19|SP140	2.59665	1.76203	2.7727	4.05704	2.47672	4.50341	4.5534	3.38716	0.829013	2.14108	1.97898	2.07928	2.6109	2.95851	1.8934	2.96049
ENSG00000079277.22|MKNK1	35.6071	23.7109	25.0756	35.2533	32.4093	31.7598	38.9709	32.0215	21.94	29.8664	19.4867	20.0195	21.3436	24.5667	26.0523	23.4827
ENSG00000079308.20|TNS1	56.6613	49.9964	53.4559	56.7968	59.1011	61.8508	48.0878	48.5482	58.5397	56.4117	61.1167	53.0742	138.021	137.24	114.108	153.623
ENSG00000079313.15|REXO1	41.9943	38.4937	36.7277	38.0539	47.6549	39.194	44.1362	50.9642	28.6281	34.7943	28.59	28.0665	24.8601	29.6753	27.2139	31.9129
ENSG00000079332.15|SAR1A	48.5245	43.2798	43.0851	48.919	48.5712	52.8052	49.3729	48.2623	43.1892	48.686	46.2676	54.5532	52.7883	47.3704	54.5399	59.1568
ENSG00000079335.20|CDC14A	6.61211	7.33688	10.6157	8.86798	12.269	8.92966	9.31326	9.7159	4.69377	4.09592	3.65406	3.1638	5.78166	4.50191	5.55931	5.54389
ENSG00000079337.16|RAPGEF3	28.9184	24.4926	30.2925	27.4203	27.6459	29.4023	35.4247	26.1121	8.09167	11.7971	6.14424	8.92553	6.25854	7.98862	10.0867	10.409
ENSG00000079385.23|CEACAM1	6.72701	7.851	10.5956	8.76357	6.79583	7.98044	8.44174	8.85571	10.4125	11.8684	10.9353	14.6141	12.127	12.9001	11.9247	13.2466
ENSG00000079387.14|SENP1	8.17248	8.00922	7.81064	8.27515	11.8291	8.02223	8.58915	9.01474	11.4862	10.7217	8.6687	9.59175	10.1772	9.77679	8.66382	7.1351
ENSG00000079393.21|DUSP13	0	0	0	0	0	0	0	0	0	0	0	0	0	0	0	0.037159
ENSG00000079432.9|CIC	47.4868	39.3548	43.5833	43.4226	48.0702	47.7791	46.3609	48.7452	33.0449	33.3775	29.9258	30.9739	34.0836	42.0528	35.1346	38.2325
ENSG00000079435.10|LIPE	1.90595	3.03646	1.84356	2.18585	1.34941	2.85816	1.79499	2.66725	2.90393	4.9555	2.80716	3.71503	2.8807	2.89887	2.61424	4.90846
ENSG00000079459.13|FDFT1	47.3341	49.3371	45.3644	45.887	40.6548	46.1693	53.9609	44.6663	91.2065	86.9106	98.0829	99.0977	94.4921	90.0266	92.91	94.42
ENSG00000079462.8|PAFAH1B3	24.2289	17.5756	26.2751	16.6993	19.8973	14.8495	16.155	21.9548	25.4072	24.7362	21.7066	25.7197	20.2412	25.6014	20.8969	22.9433
ENSG00000079482.14|OPHN1	6.96192	4.33199	6.82806	6.54923	6.50044	5.87221	4.36709	5.56863	4.37542	6.1711	3.48658	3.66439	2.86515	3.39562	3.7035	5.77817
ENSG00000079557.5|AFM	0	0	0	0	0	0	0	0	0	0	0	0	0	0	0	0
ENSG00000079616.13|KIF22	7.32015	8.33921	10.1519	9.85479	6.95235	9.12108	10.5429	8.14338	23.9966	25.5489	24.5876	27.5412	15.7028	16.1126	12.4659	13.3473
ENSG00000079689.14|SCGN	0	0	0	0	0	0	0	0	0	0	0	0	0	0	0	0
ENSG00000079691.18|CARMIL1	0.672042	1.05004	1.34146	0.867688	0.921817	0.836867	1.36552	1.22748	3.24088	3.43037	4.00064	2.566	3.85956	3.81341	3.21168	3.66176
ENSG00000079739.17|PGM1	20.9758	16.9723	19.1869	18.0792	23.5042	19.8085	22.505	23.0461	30.4813	25.9095	27.1723	30.9475	36.6869	36.5711	37.2613	38.9384
ENSG00000079785.16|DDX1	68.6379	73.4631	71.4483	83.9349	80.5969	78.5117	75.7932	80.178	90.8088	79.1236	92.4924	96.6055	88.5091	90.968	77.409	90.6868
ENSG00000079805.19|DNM2	133.352	125.158	136.807	140.848	142.143	141.931	146.552	150.747	110.983	111.933	105.967	104.062	116.391	122.171	110.038	130.344
ENSG00000079819.19|EPB41L2	68.7141	68.0455	67.595	73.7645	75.2155	78.2501	85.9844	75.058	33.6403	37.5586	28.9661	32.7379	38.1695	39.7978	39.4671	43.9193
ENSG00000079841.18|RIMS1	0	0	0	0	0	0	0	0.046746	0.064624	0	0	0	0.060031	0	0	0
ENSG00000079931.15|MOXD1	0	0	0	0.234002	0.147434	0	0.524115	0.20494	0.183194	0.150256	0.140314	0.264293	0.269968	0.196541	0	0.465193
ENSG00000079950.14|STX7	16.241	15.4826	16.2953	18.0434	16.7216	19.1314	18.287	18.8083	9.12342	10.8807	10.0995	9.19521	11.7367	13.4146	12.3	12.6126
ENSG00000079974.18|RABL2B	24.5219	22.8388	27.7871	28.7643	29.2332	30.6816	27.1962	29.1625	11.312	20.3939	11.3046	13.9979	13.0771	12.5183	14.4556	14.7645
ENSG00000079999.14|KEAP1	78.2557	64.3125	75.6385	74.7288	68.8262	69.9388	78.0491	77.8409	66.3214	62.4581	71.1866	64.9806	61.4108	65.4881	63.9323	63.5293
ENSG00000080007.8|DDX43	0	0.406305	0	0	0.21648	0.214204	0.479881	0.224376	0	0.916309	0.279606	0.129087	0.47724	0	0	0.493523
ENSG00000080031.10|PTPRH	7.17598	5.75583	5.3316	6.34407	7.8136	7.0586	6.48263	6.0654	1.28505	1.86256	1.51445	1.26897	2.03687	1.49256	1.72481	1.90553
ENSG00000080166.16|DCT	0	0.094747	0	0.050952	0	0	0	0	0	0.018349	0	0	0	0	0	0
ENSG00000080189.15|SLC35C2	29.3198	24.2461	24.6708	27.2868	24.439	26.0245	28.1162	28.1504	12.8827	24.9687	12.1599	11.381	11.675	16.5478	18.0605	13.44
ENSG00000080200.10|CRYBG3	8.82106	8.65073	9.363	10.8461	11.2097	9.64548	10.1897	10.4089	8.67181	7.93992	11.2607	8.31846	13.4965	11.9156	11.0711	16.5082
ENSG00000080224.17|EPHA6	0	0	0	0	0	0	0	0	0	0	0	0	0	0	0	0
ENSG00000080293.10|SCTR	0	0	0	0	0	0	0	0	0	0	0	0	0	0	0	0
ENSG00000080298.16|RFX3	4.08409	4.30816	3.37591	4.0866	3.81285	3.99017	3.48643	3.92578	1.17271	1.4608	1.62997	1.43323	1.30675	1.81612	1.78768	3.18758
ENSG00000080345.18|RIF1	15.7776	15.4868	15.3224	18.4913	16.8292	17.2478	16.1168	16.2488	10.8859	15.397	13.2964	11.1244	12.4837	11.289	14.0781	20.4561
ENSG00000080371.6|RAB21	11.8132	12.0442	14.7878	15.5361	14.8601	13.4009	13.5495	13.561	10.1486	12.6222	9.39644	10.5752	10.6064	11.075	12.1217	11.4832
ENSG00000080493.18|SLC4A4	0	0	0.015992	0	0.030353	0	0	0	0	0	0.013521	0.056253	0	0.063196	0	0.068631
ENSG00000080503.24|SMARCA2	27.1337	25.3039	37.0607	30.9987	33.6895	32.2871	32.2003	29.9273	24.1066	29.296	24.3691	22.6604	30.6283	28.0953	28.4274	25.7551
ENSG00000080511.5|RDH8	0	0	0	0	0	0	0	0	0	0	0	0	0	0	0	0
ENSG00000080546.13|SESN1	25.6005	25.9673	33.3132	39.8902	29.6918	33.6384	29.1946	27.4915	14.3374	18.0509	13.0871	14.6914	17.2108	17.3401	20.4553	18.3709
ENSG00000080561.14|MID2	11.9132	11.107	12.1687	10.8776	13.13	11.6718	12.2843	13.4292	10.506	9.02681	10.3671	8.24011	11.3494	10.1782	8.9175	11.7223
ENSG00000080572.13|DNAAF6	0	0	0	0	0	0	0	0	0	0	0	0	0	0	0	0
ENSG00000080573.7|COL5A3	0	0	0	0	0.165269	0.139061	0.078638	0.095457	0	0	0.037547	0	0	0	0	0
ENSG00000080603.17|SRCAP	28.8187	15.4313	24.7024	25.761	42.361	27.4566	24.0993	16.8468	21.7705	16.35	13.5711	12.8511	18.4439	25.7496	20.6388	18.5948
ENSG00000080608.10|PUM3	29.5819	24.098	28.1956	38.2592	33.2087	28.8892	34.2848	36.6432	34.147	46.1208	41.2677	45.2624	36.3123	40.498	37.868	42.113
ENSG00000080618.17|CPB2	0	0	0	0	0.18472	0.039313	0	0	0	0	0	0	0.097391	0	0	0
ENSG00000080644.16|CHRNA3	0.045625	0	0	0	0	0	0.159787	0.042007	0	0	0	0	0.066109	0.00056	0.050462	0
ENSG00000080709.16|KCNN2	0.679089	0.714389	0.405251	0.589984	0.802281	0.561082	0.874088	1.11387	0.17207	0.314941	0.248552	0.31147	0.266911	0.560346	0.285862	0.384099
ENSG00000080802.19|CNOT4	20.9873	19.4906	19.7774	18.9598	20.5577	18.6018	19.8009	20.6127	17.8856	16.4647	18.0837	16.295	17.2456	18.929	16.9667	21.9387
ENSG00000080815.19|PSEN1	58.0721	56.8546	52.4729	50.3129	49.749	45.6572	53.0667	55.698	35.5909	37.0805	35.0356	35.3956	40.1301	38.897	39.5824	38.5193
ENSG00000080819.9|CPOX	28.5655	27.8121	28.2619	30.1957	26.5744	29.1709	33.267	29.7374	23.2626	23.291	22.2555	25.1051	32.5314	32.7956	30.8012	31.5599
ENSG00000080822.17|CLDND1	60.5286	69.7888	71.6301	73.4009	72.1159	76.8742	88.2068	81.0707	40.6765	45.0563	44.8548	44.5463	44.9872	47.4029	47.0585	50.5961
ENSG00000080823.23|MOK	16.968	15.2657	20.1731	20.7592	13.3886	17.2684	17.583	15.6469	12.7269	14.8012	14.7219	13.322	15.2588	13.2929	13.3035	15.1722
ENSG00000080824.19|HSP90AA1	526.389	501.409	435.763	473.087	480.629	454.762	521.58	487.659	532.065	527.571	561.024	564.806	532.584	530.342	515.931	515.614
ENSG00000080839.12|RBL1	2.35789	1.7591	2.18856	1.32701	3.26667	2.12678	2.1453	2.39955	5.39692	4.87484	4.73106	4.40414	4.44435	4.3454	3.63945	4.17581
ENSG00000080845.19|DLGAP4	123.356	117.586	118.987	112.053	124.377	123.789	125.618	120.722	87.2652	91.1109	93.3568	82.2273	94.9023	97.751	85.2289	88.5329
ENSG00000080854.16|IGSF9B	0.12299	0.040001	0.050541	0.036734	0.052555	0.076628	0.066202	0.037782	0.033482	0.153316	0.040837	0.023107	0.016162	0.058135	0	0.011726
ENSG00000080910.13|CFHR2	0	0	0	0	0	0	0	0	0	0	0	0	0	0	0	0
ENSG00000080947.15|CROCCP3	9.94438	6.36674	7.29482	9.37487	15.5322	8.88803	6.95119	7.79668	1.24354	2.78249	1.30752	1.94348	2.04567	2.33554	3.21453	4.95209
ENSG00000080986.13|NDC80	0.602885	0.99639	0	1.66415	0.254985	1.50228	0	0.265422	10.2226	10.3601	7.62395	9.30479	7.17337	6.42902	2.01799	4.77094
ENSG00000081014.11|AP4E1	9.21827	7.34579	10.4047	10.7505	11.8171	10.0172	9.13841	9.98743	7.40745	8.46511	8.09627	7.69066	8.72528	9.19302	8.84139	10.77
ENSG00000081019.13|RSBN1	6.21884	7.13583	6.80872	7.33408	9.1253	7.56769	7.35178	7.29984	4.01295	4.54701	5.22348	4.26376	6.64933	6.69009	5.31345	6.73988
ENSG00000081026.19|MAGI3	6.295	5.73273	5.38296	5.53342	5.94046	6.18469	6.82196	6.52988	6.3994	6.19862	5.67058	5.46991	8.04956	7.94529	7.85909	8.77624
ENSG00000081041.9|CXCL2	85.5806	82.3374	77.3747	97.0128	96.4851	100.081	112.042	113.576	74.3099	102.946	76.5248	98.721	108.654	105.086	117.471	102.367
ENSG00000081051.8|AFP	0.118129	0	0.24203	0	0	0	0	0.181853	0	0	0	0	0	0	0	0
ENSG00000081052.14|COL4A4	0	0	0	0	0	0	0	0	0.121183	0.032959	0.060827	0.018694	0	0.089583	0.034415	0.118968
ENSG00000081059.20|TCF7	0.372487	0	0.168207	0.295154	0.599444	0.19618	0.111954	0.319955	2.22429	1.62761	1.6987	1.76515	2.55689	2.64962	1.18387	3.66706
ENSG00000081087.15|OSTM1	36.9235	33.3205	36.7093	35.172	36.7865	38.3453	40.3148	39.0219	26.394	31.2166	30.8594	31.4939	34.9983	33.1342	35.3148	36.4596
ENSG00000081138.14|CDH7	0.023673	0	0	0	0	0	0	0	0	0	0	0	0	0	0	0
ENSG00000081148.12|IMPG2	0.354195	0.195011	0.112218	0.091942	0	0.215205	0.317276	0.22949	0.199358	0.296074	0.115159	0.014486	0.099717	0.213285	0.12516	0.272436
ENSG00000081154.12|PCNP	106.018	107.597	106.506	126.042	116.562	121.456	122.615	111.506	92.7435	111.093	101.843	98.1464	102.891	106.904	111.234	120.357
ENSG00000081177.18|EXD2	24.9708	20.3067	24.1503	21.4919	27.2098	29.6915	28.2817	27.0343	18.9345	19.6396	21.0715	18.5582	19.6046	20.5595	21.7189	25.2998
ENSG00000081181.8|ARG2	4.81993	4.93754	3.00938	3.80127	4.93184	5.27022	5.70364	5.47034	4.78441	4.91941	5.18008	5.30269	5.78602	4.47447	2.88482	4.64788
ENSG00000081189.16|MEF2C	11.2965	9.81181	10.064	12.2282	11.2943	11.5274	9.76426	10.547	6.66501	7.31478	9.35889	6.25981	6.16474	5.18452	4.36001	5.45457
ENSG00000081237.20|PTPRC	0	0	0	0	0	0	0	0	0	0	0	0	0	0	0.03223	0
ENSG00000081248.12|CACNA1S	0	0	0	0	0	0	0	0	0	0	0	0	0	0	0	0
ENSG00000081277.13|PKP1	0	0	0	0	0	0.052436	0	0	0	0	0	0	0	0	0	0
ENSG00000081307.15|UBA5	25.05	20.5999	25.7226	27.933	25.1965	24.8636	26.8004	27.7646	13.7087	18.5703	15.0049	19.1368	20.1169	15.7407	19.6805	17.6672
ENSG00000081320.11|STK17B	5.09478	4.56551	4.73069	4.17459	4.32293	5.1798	5.09176	5.93342	4.43828	4.18593	3.88762	3.66942	3.02858	3.36881	2.51946	2.78581
ENSG00000081377.17|CDC14B	1.12555	2.11012	1.22749	2.2845	1.44016	3.05507	2.26058	2.71027	1.1289	2.33272	0.84444	1.04666	1.90672	1.5375	1.95029	2.12121
ENSG00000081386.13|ZNF510	5.96772	5.59326	5.28678	5.91043	6.00376	5.85282	5.8636	6.10416	2.9288	3.09657	3.14024	2.70077	3.26417	3.20343	3.40451	4.11809
ENSG00000081479.15|LRP2	0	0	0	0.035722	0	0	0	0	0.008264	0	0	0	0	0.037099	0	0
ENSG00000081665.14|ZNF506	6.64561	4.46664	5.11349	6.14169	6.85404	6.08374	5.45558	6.32589	5.71441	8.81044	5.80849	6.45443	7.67347	8.12452	7.01407	9.37468
ENSG00000081692.13|JMJD4	12.9977	15.3311	16.1182	13.675	10.7359	14.7789	17.8885	16.9162	19.1245	19.4151	18.5587	15.4721	14.6919	14.6075	16.0151	12.3719
ENSG00000081721.12|DUSP12	21.1959	16.1516	19.9508	28.8085	18.1514	22.7154	22.8015	22.5086	17.0796	24.9426	17.5472	24.7821	21.5469	19.9834	18.7553	23.6351
ENSG00000081760.17|AACS	16.3028	12.5296	16.7425	16.8844	15.7154	17.7262	16.8433	18.5178	15.936	20.5057	16.3632	16.4345	19.1845	20.9221	18.0004	19.4661
ENSG00000081791.9|DELE1	34.0562	38.5514	34.4418	42.6843	45.5258	37.8891	43.4212	39.3261	24.0237	29.7438	21.62	28.1465	23.9553	31.9169	28.6339	29.6993
ENSG00000081800.9|SLC13A1	0	0	0	0	0	0	0	0	0	0	0	0	0.10997	0	0	0
ENSG00000081803.16|CADPS2	13.5565	11.2773	9.84798	13.6549	11.3328	12.5759	14.2044	12.7452	21.3145	20.047	21.8666	20.0045	22.3412	20.5292	18.873	22.8957
ENSG00000081818.4|PCDHB4	0.214406	0.294788	0.356595	0.205586	0.393673	0.242903	0.291536	0.218015	0.145438	0.111243	0.046096	0.142507	0.160746	0.051378	0.064004	0.42116
ENSG00000081842.18|PCDHA6	1.59906	0.44428	0.304595	0.578708	0.220869	0.645582	0.518417	1.41084	0.047146	0.191277	0.186682	0.212076	0.250703	0.289171	0.316782	0.227053
ENSG00000081853.15|PCDHGA2	2.73063	1.80794	2.01019	3.05998	1.79463	2.48046	1.36776	2.25864	0.883377	1.08004	0.64999	0.716929	1.46749	0.945405	0.862823	1.05504
ENSG00000081870.12|HSPB11	19.7038	25.5406	24.0023	22.2192	24.0393	35.5518	31.9315	25.2617	35.0052	51.5213	32.4922	46.3307	46.9191	35.9049	47.8439	39.4088
ENSG00000081913.14|PHLPP1	6.39165	5.2199	7.03531	6.25056	7.29437	6.10832	7.90536	5.88111	4.22941	4.97993	3.74826	3.70984	5.54174	4.74421	4.40236	4.93943
ENSG00000081923.15|ATP8B1	46.5487	40.054	45.3493	48.3283	51.0608	50.5207	50.2462	49.0406	20.1322	18.0009	20.1746	19.562	18.4179	19.435	15.3716	20.9921
ENSG00000081985.13|IL12RB2	0	0	0	0	0	0	0	0	0	0	0	0	0	0	0	0
ENSG00000082014.17|SMARCD3	14.6769	11.4734	18.2167	15.2787	15.2082	15.581	16.3992	14.7748	7.95339	8.24034	8.49204	7.54877	7.94458	8.50348	14.2112	13.052
ENSG00000082068.9|WDR70	17.0329	15.61	18.4834	14.4061	18.8986	18.2119	16.1747	18.0677	16.3942	17.5448	17.2084	18.8807	15.6393	15.4911	14.4836	16.946
ENSG00000082074.19|FYB1	0	0.087954	0	0	0.274678	0.107585	0	0	0.241301	0	0.059978	0	0.042291	0.055701	0.005664	0
ENSG00000082126.18|MPP4	19.4652	18.8921	21.4608	25.0681	22.6883	24.647	22.4866	25.5622	4.13762	5.58629	3.68115	4.23045	2.96362	3.16383	3.55265	4.32793
ENSG00000082146.13|STRADB	18.3094	18.93	21.1258	24.2377	23.1609	21.9114	17.7351	22.7372	18.2094	23.3249	19.0848	16.6344	17.2578	19.6603	17.4137	17.4757
ENSG00000082153.18|BZW1	73.9616	64.2688	60.7947	74.3107	71.6007	85.4865	64.9328	71.0448	90.0671	92.3223	84.7677	81.6632	99.1799	98.6951	80.4054	90.1817
ENSG00000082175.15|PGR	0	0	0	0.019781	0	0	0	0.005291	0.029359	0.011921	0	0.008365	0	0.025569	0.026487	0
ENSG00000082196.21|C1QTNF3	1.25579	1.68693	1.2766	1.37436	1.13275	2.07374	0.553741	1.13101	0.142883	0.273579	0.094511	0.261431	0.378594	0.527781	0.205167	0.53917
ENSG00000082212.13|ME2	15.3723	19.8851	11.0432	22.9373	15.1288	21.2214	12.5587	23.5545	14.8431	23.5781	35.2576	33.3464	32.7909	27.255	21.6572	27.8239
ENSG00000082213.18|C5orf22	17.3791	18.746	18.8969	19.8702	22.2925	18.1486	19.2841	16.9512	18.0126	18.7285	16.6395	17.4974	20.1316	17.4584	15.2848	17.2667
ENSG00000082258.13|CCNT2	19.9405	19.1823	19.9614	24.2667	17.8815	22.1085	23.0945	26.6231	10.4252	17.597	10.7821	12.6886	12.6601	12.7112	11.0186	15.5952
ENSG00000082269.17|FAM135A	10.4783	8.61342	8.38756	10.9959	7.51391	11.7098	9.9826	9.40371	5.74122	5.13489	4.68883	3.8303	5.22728	5.70095	4.62059	4.78112
ENSG00000082293.13|COL19A1	0	0	0	0	0	0	0	0	0	0	0	0	0	0	0	0
ENSG00000082397.18|EPB41L3	56.0658	51.1006	58.1376	58.8272	50.0746	50.8236	50.9414	62.9682	65.2112	68.0241	73.5584	60.9822	97.1319	89.8457	82.0326	94.5337
ENSG00000082438.18|COBLL1	6.30096	4.11452	7.90994	8.01744	6.50531	5.41441	4.8255	5.732	4.86979	8.157	4.42792	6.41742	7.33534	5.0229	3.76123	7.99307
ENSG00000082458.12|DLG3	1.8766	0.817173	1.31915	1.68755	2.39735	1.52344	1.62404	1.30368	2.73606	2.41536	1.72019	2.48031	4.43573	3.20975	2.17687	2.49691
ENSG00000082482.14|KCNK2	0	0.03678	0	0	0	0	0	0	0	0.03181	0	0	0	0	0	0
ENSG00000082497.12|SERTAD4	0.399111	0.351817	0.211341	0.483677	0.38562	0.341866	1.08816	0.406305	0.875629	0.269076	0.526347	0.572497	0.856942	0.35977	0.51248	0.518737
ENSG00000082512.15|TRAF5	15.4315	15.2519	14.9409	22.0952	20.2706	19.1133	20.8902	24.3926	7.3098	12.8372	7.88763	9.33717	9.89038	10.8498	11.5146	13.5987
ENSG00000082515.18|MRPL22	14.6787	16.3068	15.8671	23.8166	15.1167	22.6064	15.4563	26.1798	27.7451	30.651	28.5419	39.603	22.2523	22.1317	28.8089	23.0028
ENSG00000082516.9|GEMIN5	10.9909	11.9243	11.272	12.2745	10.4518	12.1075	13.6641	12.5233	18.9645	15.2458	19.2482	14.9253	16.0105	17.5912	11.3165	15.361
ENSG00000082556.14|OPRK1	0	0	0	0	0	0	0	0	0	0	0	0	0	0	0	0
ENSG00000082641.16|NFE2L1	314.197	300.922	318.144	298.104	336.928	330.147	361.007	337.093	249.954	231.633	229.149	248.915	290.361	303.323	274.904	288.484
ENSG00000082684.16|SEMA5B	0	0	0	0.10274	0	0.143474	0	0	0	0	0	0	0	0	0	0
ENSG00000082701.17|GSK3B	31.9027	31.037	30.9892	32.6681	36.0784	32.8811	33.8345	34.8031	32.405	38.9247	27.8378	29.881	32.5821	36.2532	38.1273	48.2195
ENSG00000082781.12|ITGB5	132.751	116.809	130.918	125.016	146.094	143.254	154.579	143.787	76.3645	80.3923	75.8917	78.9117	89.3193	97.6037	85.7273	101.984
ENSG00000082805.20|ERC1	28.3692	23.3505	27.59	26.1231	23.967	24.0501	22.6571	24.6041	31.2624	28.6945	28.6557	25.9452	36.1396	37.526	32.8312	37.6348
ENSG00000082898.19|XPO1	62.6629	60.9667	63.9006	67.7191	65.4385	79.6506	78.5919	73.3642	66.4077	87.369	70.6087	68.0756	78.8383	87.9732	81.0883	91.0975
ENSG00000082929.8|LINC01587	0	0	0	0	0	0	0	0	0	0	0	0	0	0	0	0
ENSG00000082996.20|RNF13	40.1159	38.1312	38.7287	42.7582	50.1745	42.6477	43.1124	43.9497	23.4612	33.1063	27.557	28.3448	29.563	31.9152	27.8923	34.5152
ENSG00000083067.24|TRPM3	0.740633	0.260281	0.398491	0.349574	0.284981	0.239372	0.122798	0.404676	0.367512	1.16185	0.292092	0.689384	0.645211	0.404538	0.658693	1.06021
ENSG00000083093.10|PALB2	8.2528	8.34395	9.49402	10.8627	11.8158	10.0492	10.6771	9.30612	6.03186	9.06225	7.89156	9.94559	7.86988	9.28622	9.44103	8.63486
ENSG00000083097.15|DOP1A	9.37766	9.83878	10.7653	14.8992	12.7271	13.1611	13.6514	14.8875	5.1578	7.36599	6.37746	5.70162	6.97966	5.77714	6.9958	8.21909
ENSG00000083099.11|LYRM2	12.5142	10.5071	11.5334	15.0642	10.8938	11.3276	16.509	14.7912	16.8291	16.4944	15.1313	15.7201	13.9026	15.8561	13.5612	17.4834
ENSG00000083123.15|BCKDHB	7.35102	5.66792	7.93286	6.00561	6.59124	5.21077	7.06415	8.428	6.6316	11.5174	8.55449	7.82056	6.95834	9.91644	6.72058	7.26638
ENSG00000083168.11|KAT6A	23.5709	23.304	24.6891	25.8358	26.1263	22.8043	27.7895	23.1706	20.3894	19.6712	18.3777	16.093	20.5818	24.5307	20.489	23.4493
ENSG00000083223.18|TUT7	27.1579	25.1254	29.6962	27.4527	29.5518	28.4808	31.7044	31.6074	18.1657	19.5122	21.8279	18.0173	23.3172	20.6676	22.2271	25.4425
ENSG00000083290.20|ULK2	9.02878	7.40773	6.33406	8.18986	7.82505	6.76552	6.85872	8.76043	5.35878	6.16525	5.7701	5.41944	7.68558	8.11801	7.31836	8.72179
ENSG00000083307.12|GRHL2	0	0	0	0	0	0	0	0	0	0	0	0	0	0	0	0
ENSG00000083312.19|TNPO1	182.18	197.71	178.268	200.034	206.257	226.239	204.004	209.256	153.926	155.586	170.943	149.954	163.648	176.316	176.516	183.246
ENSG00000083444.17|PLOD1	456.571	440.689	433.277	413.582	519.659	505.868	507.807	493.751	244.15	237.705	243.365	249.291	323.704	353.193	305.626	338.421
ENSG00000083454.22|P2RX5	0.432306	0	0	0.13252	0	0.480389	0.830222	0.381984	0.705345	0	0.406753	0.907089	0.420482	0.663425	0.534909	0.071971
ENSG00000083457.12|ITGAE	16.8058	22.6712	11.248	23.2008	29.935	25.7609	27.2949	22.7542	25.8186	32.535	26.4072	30.51	30.1267	26.3811	37.0433	26.7036
ENSG00000083520.15|DIS3	13.1524	13.1035	14.9517	16.305	13.9937	17.4808	17.284	17.1577	14.5378	13.3699	16.7617	13.7505	16.0539	14.5456	13.5529	17.9752
ENSG00000083535.16|PIBF1	11.7845	10.999	12.6558	13.8483	16.6015	12.855	14.4354	15.0756	6.93066	8.33225	7.58644	7.93501	7.28837	7.26609	8.48785	9.70556
ENSG00000083544.16|TDRD3	10.2248	10.9972	14.3444	13.4066	15.6085	12.5218	11.563	13.0559	7.37265	7.96263	8.69497	7.83501	8.46	9.52873	8.36765	10.4457
ENSG00000083622.8|AC000111.6	0	0	0	0	0	0	0	0	0	0	0	0	0	0	0	0
ENSG00000083635.8|NUFIP1	3.94852	5.91583	4.70151	4.8027	4.86802	4.57773	5.65117	5.86927	6.92946	6.74325	6.56904	6.3985	5.01574	5.97546	5.15885	6.81679
ENSG00000083642.19|PDS5B	11.979	10.7676	12.6356	12.9767	14.0084	12.4094	14.3291	12.3093	10.3664	11.414	9.46913	9.28706	12.2847	11.4881	12.0467	11.9773
ENSG00000083720.13|OXCT1	11.1513	10.8375	12.7454	13.211	13.8597	10.9305	15.2496	13.4357	17.1661	16.6395	17.8386	17.5991	16.2204	16.5953	14.6332	14.5586
ENSG00000083750.13|RRAGB	26.4831	22.9627	24.0066	23.8795	17.5998	22.3079	27.6309	26.976	12.8792	15.1777	11.6791	13.8335	13.6854	14.9597	15.088	16.1766
ENSG00000083782.8|EPYC	0	0	0	0	0	0	0	0	0	0	0	0	0	0	0	0
ENSG00000083799.18|CYLD	33.0978	29.3271	35.0729	29.1121	30.8041	41.7912	43.6833	35.6331	24.5301	28.3113	19.5088	18.2055	23.4427	19.6551	21.8873	27.0685
ENSG00000083807.10|SLC27A5	7.64742	6.47142	2.12934	4.30762	10.8099	4.29625	6.35586	6.22383	10.3541	9.36358	8.80256	10.3311	8.31826	5.81605	8.86176	6.47468
ENSG00000083812.12|ZNF324	8.60503	7.08141	9.35655	7.66133	8.15047	8.77777	9.62934	9.15439	4.48954	3.37051	4.6363	5.07227	4.47699	5.07187	4.48409	5.71272
ENSG00000083814.13|ZNF671	3.39668	5.09069	4.487	8.18251	9.19764	7.14144	6.83411	8.91145	4.42658	3.69093	4.08394	3.86088	3.28644	3.81225	3.18479	3.46552
ENSG00000083817.9|ZNF416	7.36665	7.40301	6.85984	6.11607	5.44982	6.60017	6.52654	6.6739	5.4539	5.38084	4.47163	4.13393	4.07822	4.58416	4.52723	3.19865
ENSG00000083828.16|ZNF586	14.0859	13.5005	10.789	13.1627	11.3472	13.9029	12.7788	10.9605	7.59635	14.8491	7.42729	8.23185	8.4962	8.79574	12.3189	11.4897
ENSG00000083838.16|ZNF446	6.44535	7.23424	6.57094	6.00255	5.39664	8.89136	7.30565	7.0467	4.59945	5.03956	4.65999	4.24018	4.88027	5.20965	4.20709	6.41307
ENSG00000083844.10|ZNF264	9.31394	8.20663	7.74988	8.89801	7.92742	10.4891	9.91196	8.79835	7.88613	7.86624	6.95758	7.07799	10.4265	10.1241	10.9059	11.0738
ENSG00000083845.9|RPS5	963.315	1002.39	984.47	947.248	620.949	890.724	948.616	777.077	1596.6	1421.47	1594.11	1533.37	1451.16	1400.2	1393.44	1445.65
ENSG00000083857.14|FAT1	0.325517	0.147131	0.37868	0.590793	0.634847	0.253844	0.338402	0.272357	0.48641	0.073992	0.244633	0.160374	0.402122	0.271324	0.200924	0.591479
ENSG00000083896.13|YTHDC1	42.4576	39.6225	38.8552	42.7797	41.5449	36.9283	49.5076	53.9513	28.8954	22.6477	22.5767	20.7175	24.351	28.6335	22.0611	36.5844
ENSG00000083937.10|CHMP2B	33.651	28.1041	31.9196	34.0597	29.8849	33.952	31.95	38.2734	23.6234	22.0073	20.7941	30.2059	29.6277	27.8933	28.956	29.7852
ENSG00000084070.12|SMAP2	11.1434	9.88316	9.95716	15.6642	11.6519	12.9124	14.0648	11.3723	15.7841	15.0683	14.6602	15.5427	17.6094	15.7497	12.2012	17.4297
ENSG00000084072.17|PPIE	30.2502	24.2725	30.9708	32.867	31.4166	27.6098	24.5408	30.0033	32.2329	36.4506	24.8546	40.1845	20.6478	37.8863	28.7847	27.6536
ENSG00000084073.10|ZMPSTE24	58.3394	49.7988	58.7072	52.6653	65.2947	55.0285	56.6866	58.1541	58.1952	55.2682	58.5046	48.6244	60.6722	57.2714	58.0989	58.4806
ENSG00000084090.14|STARD7	86.1492	85.1948	84.3886	92.8837	98.5306	91.2288	97.3492	102.798	90.1242	87.1471	92.2561	82.2789	89.1157	81.7083	74.8823	82.259
ENSG00000084092.7|NOA1	25.0022	28.5552	22.6071	23.0181	25.3115	27.6664	27.1257	28.0366	22.8234	19.6601	23.7529	20.9806	24.2319	22.6438	19.0797	20.6986
ENSG00000084093.19|REST	30.7213	28.5388	31.413	31.335	34.3272	29.9854	31.3634	31.2783	31.4139	29.4404	33.4895	27.3646	38.5988	40.5636	34.7026	46.284
ENSG00000084110.11|HAL	0	0.075061	1.08606	0.223939	0	0.559662	0	0.143053	0.019788	0.162757	0	0	0	0	0.050731	0
ENSG00000084112.15|SSH1	52.6249	48.5821	52.7046	56.2207	61.802	56.6317	55.5382	56.2558	30.9037	36.9242	26.4161	26.9916	37.1363	40.2907	36.5079	43.6713
ENSG00000084207.18|GSTP1	639.439	692.565	659.861	671.281	643.927	654.538	564.49	621.523	934.294	885.72	968.266	979.063	981.002	946.676	980.277	934.803
ENSG00000084234.18|APLP2	787.557	729.412	848.721	858.458	942.465	959.342	920.062	907.605	451.028	434.011	444.294	514.886	582.758	657.513	562.043	627.079
ENSG00000084444.14|FAM234B	4.8362	4.44991	4.84199	6.51922	6.5803	6.59542	7.30603	6.49586	2.8704	2.78743	2.90443	3.04892	2.18768	2.59728	2.37243	3.46605
ENSG00000084453.17|SLCO1A2	0	0	0	0.016743	0.146833	0	0	0	0	0	0	0	0	0	0	0
ENSG00000084463.8|WBP11	27.4309	23.8931	27.3842	26.1308	31.8845	25.8542	30.2098	31.0406	36.0848	33.3066	32.6602	34.7886	31.7423	29.8761	28.0624	33.3347
ENSG00000084623.12|EIF3I	161.397	183.03	175.181	157.903	163.582	166.233	176.128	169.497	262.92	263.504	326.032	295.988	302.673	273.586	244.809	253.193
ENSG00000084628.10|NKAIN1	0	0	0	0	0	0	0.276681	0	0.147595	0.213861	0.129675	0.206478	0.098628	0.161515	0.117884	0.552942
ENSG00000084636.18|COL16A1	3.22811	3.34597	4.52886	3.88885	2.73625	3.97621	3.8967	4.18874	1.32977	1.52011	0.949038	1.40036	1.68037	1.83122	1.69162	1.42536
ENSG00000084652.16|TXLNA	51.4091	41.0357	51.8842	51.1131	49.6448	49.8745	54.1914	50.0405	46.3149	43.9166	38.4241	41.0819	54.4491	52.0157	40.3251	49.3441
ENSG00000084674.15|APOB	0.050838	0.048908	0.118999	0.039652	0.131754	0.085629	0.097133	0.039117	0.356408	0.438283	0.418633	0.342728	0.410658	0.271171	0.172508	0.106549
ENSG00000084676.16|NCOA1	13.2817	14.5637	13.902	12.0201	11.5412	12.0143	13.3079	14.0645	7.62489	10.2541	7.38035	9.03694	9.82475	10.8103	9.93212	10.9996
ENSG00000084693.16|AGBL5	19.5086	22.5944	25.4842	22.0244	23.6486	21.7839	23.2701	20.6185	22.0315	22.7643	19.7461	18.8082	20.7434	23.6798	19.7001	24.4224
ENSG00000084710.14|EFR3B	0.534229	0.632725	0.625898	0.585671	0.135863	0.619285	0.636064	0.514253	0.349473	0.630151	0.559895	0.395986	0.56273	0.482861	0.31022	0.600065
ENSG00000084731.15|KIF3C	40.348	34.9519	37.3891	42.111	38.2271	35.9024	47.932	37.564	18.5839	17.6438	18.3994	18.1941	24.4574	23.1971	24.4742	23.6995
ENSG00000084733.11|RAB10	126.53	114.94	109.622	110.26	118.538	117.742	125.349	126.047	102.445	97.5406	109.289	95.7453	105.836	106.438	99.2541	107.18
ENSG00000084734.9|GCKR	20.9872	16.1631	23.8277	19.942	20.5683	15.9854	24.9798	19.9086	5.39061	8.70652	2.64312	6.4341	3.38929	2.52414	6.18	5.80806
ENSG00000084754.12|HADHA	202.566	199.423	214.042	190.506	203.802	198.114	202.631	198.483	185.285	164.803	185.581	168.184	170.627	172.373	170.024	181.053
ENSG00000084764.12|MAPRE3	22.5556	21.3221	25.2722	19.7728	21.6986	25.1821	24.552	25.2732	13.1854	11.6476	12.825	13.9511	16.5375	13.4673	15.9127	16.1011
ENSG00000084774.14|CAD	25.6852	21.7902	29.5938	28.2197	26.6476	25.1134	23.397	26.8537	33.1841	38.7855	34.0157	32.9553	29.6017	32.3128	28.4406	35.0003
ENSG00000085063.17|CD59	939.805	1429.67	913.293	1094.42	789.837	1097.04	885.339	1003.72	1004.62	633.717	1026.75	1212.17	1124.76	1059.06	1049.66	1198.19
ENSG00000085117.12|CD82	63.8145	57.2832	51.7428	57.2832	64.8711	64.9689	58.8086	57.7919	12.3871	10.3386	11.8496	12.7421	9.67385	10.5821	11.7652	13.6795
ENSG00000085185.16|BCORL1	13.9156	13.0691	12.5683	14.5722	13.2562	14.0093	11.6668	13.4454	8.96535	9.30859	8.45166	8.12756	8.66954	11.9605	9.82659	10.7424
ENSG00000085224.23|ATRX	33.538	32.5467	37.4749	46.2956	35.8251	37.4694	38.1503	34.6506	17.3473	25.7807	20.2856	20.103	18.7448	20.5603	28.936	30.7999
ENSG00000085231.14|AK6	24.1665	24.0866	18.695	29.3051	20.8505	24.7417	25.779	21.3752	22.5135	25.9364	31.3797	31.8104	22.8874	28.2933	33.8541	21.0812
ENSG00000085265.11|FCN1	0	0	0	0	0.019423	0	0	0	0	0	0	0.031104	0	0	0	0
ENSG00000085274.16|MYNN	7.85112	5.22466	11.3184	10.2273	10.1461	6.41006	8.87656	10.1178	8.76821	7.2116	9.25509	8.37493	7.68033	9.38053	8.37669	6.15972
ENSG00000085276.19|MECOM	18.6591	19.2417	20.6807	23.0283	25.2487	20.042	21.5032	22.0603	20.2353	23.0132	21.7466	22.0006	24.7133	25.2614	24.9703	28.1876
ENSG00000085365.18|SCAMP1	19.6678	18.8388	18.0895	22.2809	21.8262	23.8596	22.3765	22.956	13.5429	14.8604	17.8971	16.5888	20.9671	20.936	19.6705	22.1655
ENSG00000085377.15|PREP	13.3037	12.9683	14.112	14.3346	15.9011	16.7502	14.6652	16.2328	13.0079	12.7558	13.718	14.4675	18.6171	16.2468	14.1882	14.3152
ENSG00000085382.12|HACE1	9.8451	7.08335	7.44783	11.0045	9.91713	8.69127	9.14163	10.919	4.88444	6.58625	5.00428	6.16915	5.65533	7.17586	7.03796	8.91164
ENSG00000085415.16|SEH1L	11.5737	9.90705	9.39552	11.8171	14.2584	9.92694	10.9244	13.9701	17.3245	14.3371	19.992	17.904	15.8189	17.0766	13.8587	19.021
ENSG00000085433.16|WDR47	22.8497	20.6004	23.291	24.9957	21.8389	25.9605	24.5837	27.6098	15.1792	13.7177	12.4649	13.1997	19.9626	18.521	16.5361	22.9957
ENSG00000085449.15|WDFY1	85.768	75.7233	76.9499	89.3842	83.8736	90.7029	85.9952	89.9604	82.6904	81.0339	82.4435	75.1343	107.114	102.643	92.4661	111.066
ENSG00000085465.13|OVGP1	5.82032	3.61044	2.95703	5.75528	3.84077	5.47719	7.27396	5.62176	0.247945	1.04075	0.439633	0	0.307285	0.591082	0.499484	0.68399
ENSG00000085491.17|SLC25A24	39.0172	37.7357	32.3721	45.7024	41.8087	45.8494	39.8014	42.4166	31.3652	34.4645	34.1863	34.5046	41.0229	36.9959	31.2645	37.8311
ENSG00000085511.20|MAP3K4	10.3047	8.62341	12.7494	8.46791	11.2572	9.31297	13.2101	10.791	9.26479	14.1202	9.76114	9.54043	8.12998	10.0073	7.57456	9.62581
ENSG00000085514.16|PILRA	2.74718	0.534981	2.73725	3.92815	0.961083	1.24801	1.6164	1.27203	0	1.01756	0.162932	0.39878	0.31887	0.560259	0.471908	0.992897
ENSG00000085552.17|IGSF9	0	0	0	0	0	0	0	0	0	0.102467	0	0	0	0.078878	0	0
ENSG00000085563.15|ABCB1	10.2452	6.75687	10.0015	8.3847	9.85627	9.44951	11.7411	11.0116	2.63761	2.28443	2.18921	2.92732	3.83165	4.5895	3.53118	4.22751
ENSG00000085644.14|ZNF213	14.0116	11.3702	12.9143	9.85829	15.0077	11.6881	13.9769	13.2425	8.38199	8.20997	7.02758	7.80389	7.04702	7.81247	5.66303	7.70092
ENSG00000085662.14|AKR1B1	248.412	239.256	254.577	263.995	234.794	243.845	242.223	243.654	223.37	230.787	215.652	228.704	189.835	195.949	187.335	174.565
ENSG00000085719.13|CPNE3	38.7632	41.0387	41.9283	42.5615	44.2126	40.3711	42.9837	46.3851	33.5016	33.5863	36.9086	32.4535	40.1952	40.5393	35.1442	44.849
ENSG00000085721.13|RRN3	37.2148	33.0551	35.2396	41.8421	36.305	36.1165	40.2117	41.0049	30.1222	27.9896	27.7885	28.7426	27.0432	28.0217	25.2117	28.7324
ENSG00000085733.16|CTTN	384.463	330.516	365.33	446.466	434.441	448.626	509.056	455.049	282.554	324.017	236.308	316.532	320.007	358.332	365.411	384.294
ENSG00000085741.13|WNT11	0	0	0.724242	0	0	0	0	0	0	0	0.163912	0.114224	0.196963	0	0.367109	0.106428
ENSG00000085760.15|MTIF2	20.7325	18.9172	20.0795	21.2196	21.7975	24.4574	21.1917	22.4093	28.9205	28.5996	26.562	27.3945	26.9032	25.8008	26.7472	27.1901
ENSG00000085788.14|DDHD2	29.8399	25.8013	28.1567	35.094	32.691	32.3084	31.5471	36.418	22.365	27.7736	18.7016	21.304	23.0367	28.4686	28.7433	33.9955
ENSG00000085831.16|TTC39A	0.10169	0.53447	1.21674	0.151659	0.665289	1.1518	0.380636	0.594193	0.321047	0.866837	0.750336	0.418403	0.443417	0.487349	0.078717	0.695355
ENSG00000085832.17|EPS15	36.2497	32.6791	33.947	41.5788	40.043	38.2236	35.7026	41.397	28.5141	30.7394	29.7276	26.1941	30.9715	31.5847	33.1272	35.6123
ENSG00000085840.13|ORC1	0	0.957845	0.581948	0.383623	0.866596	0.114696	0.765803	0.703728	4.8777	4.83012	5.68408	5.40512	3.07585	3.48083	1.66702	1.73914
ENSG00000085871.9|MGST2	159.093	177.424	165.358	188.024	176.437	192.665	153.902	176.209	78.8553	86.0339	80.5719	90.7707	70.4199	78.9807	80.9906	74.2209
ENSG00000085872.15|CHERP	31.7961	27.8379	34.0509	32.6424	39.1313	34.4827	41.0866	39.2456	32.4548	38.3048	29.9599	33.0888	31.0348	33.8687	28.5251	34.1186
ENSG00000085978.22|ATG16L1	22.8005	28.6392	28.2039	27.712	27.0799	31.6943	29.5877	26.0833	23.0406	22.7508	20.0572	20.1335	22.687	25.1126	20.5598	26.5153
ENSG00000085982.14|USP40	20.1268	14.4001	18.8562	20.2333	20.7965	20.2799	19.3562	20.1159	19.8505	22.3118	17.3732	17.6799	21.4804	18.9417	17.4752	21.5951
ENSG00000085998.14|POMGNT1	55.1556	51.6718	58.0996	60.3111	56.0871	61.7844	54.3413	60.8116	60.1029	59.5351	54.4603	59.0423	65.5177	63.8292	60.45	70.527
ENSG00000085999.13|RAD54L	0	0.094032	0	0.032933	0	0.210909	0	0.148352	4.90621	9.61596	3.71902	3.9922	3.31515	2.38163	0.994572	2.01767
ENSG00000086015.22|MAST2	33.322	27.1061	33.696	37.9913	42.1006	39.1602	43.3038	39.1985	25.2824	26.6694	22.9256	23.392	24.6835	29.2004	25.6531	29.7018
ENSG00000086061.16|DNAJA1	242.641	244.461	222.988	221.373	244.676	240.681	265.334	241.132	241.893	242.95	255.158	268.33	260.2	256.735	232.667	231.428
ENSG00000086062.13|B4GALT1	68.6346	64.5423	62.4511	63.927	70.4252	71.9409	75.0373	74.7424	87.3456	84.1863	78.1067	82.428	99.2322	100.163	91.9339	96.4716
ENSG00000086065.14|CHMP5	84.9424	93.4397	93.569	103.482	91.2377	94.3929	100.846	92.12	86.9021	93.5691	83.9064	91.8689	96.1307	91.0244	86.9286	86.5104
ENSG00000086102.19|NFX1	25.526	27.27	30.4218	30.7332	28.8323	27.3146	30.1514	28.8679	28.4997	26.8939	26.7065	25.6689	26.4587	28.0837	24.2761	29.9944
ENSG00000086159.13|AQP6	0	0	0	0	0	0	0	0	0	0	0	0	0	0	0	0
ENSG00000086189.11|DIMT1	17.1096	18.7759	13.838	15.1736	15.1771	23.0301	15.4733	15.1259	17.1449	20.8488	21.0646	22.076	20.6312	18.2735	15.6858	20.4067
ENSG00000086200.17|IPO11	30.7445	33.9348	29.6179	28.5423	51.7156	29.3841	33.0602	37.4329	36.184	37.5005	37.9368	34.2244	46.8974	44.0937	36.2379	42.1413
ENSG00000086205.18|FOLH1	0.083848	0	0	0	0	0	0	0	0	0.131702	0	0	0	0	0	0
ENSG00000086232.13|EIF2AK1	39.2693	35.4522	42.3729	40.4972	42.5402	40.0655	40.9189	35.5824	44.7933	47.2778	44.4006	46.1216	42.8991	45.612	44.5456	43.4587
ENSG00000086288.12|NME8	0	0	0	0	0	0.090497	0	0	0	0	0	0	0	0	0	0
ENSG00000086289.12|EPDR1	0.138732	0.043136	0.186331	0.180908	0	0	0.338256	0.3201	0.87027	0.462419	1.09796	0.811795	0.902097	0.668579	0.947463	0.871691
ENSG00000086300.16|SNX10	0.112345	0.213386	0	0	0.155503	0	0	0	0.116749	0	0.272339	0.320856	0.336329	0.482667	0.064786	0
ENSG00000086475.15|SEPHS1	15.3315	17.1508	15.8032	18.9488	21.2977	19.3229	17.9922	19.9651	27.5246	27.3932	26.7468	25.6081	24.7148	23.8405	21.8146	26.4293
ENSG00000086504.18|MRPL28	72.8878	66.5532	85.7994	59.699	63.5895	69.5726	77.5664	69.1289	98.7658	84.9922	100.058	89.9134	68.672	64.5691	67.1161	69.7006
ENSG00000086506.3|HBQ1	2.1765	1.07569	0	0.859285	0	1.95646	0	3.34512	1.95451	0	1.77541	1.23721	0	1.74236	0	0
ENSG00000086544.3|ITPKC	39.4641	33.5024	43.8208	39.5862	39.4178	37.531	35.9563	39.1672	22.0907	22.7262	22.567	21.5376	23.6217	24.3653	20.9258	25.5766
ENSG00000086548.9|CEACAM6	0	0	0	0	0	0	0	0	0	0	0	0	0	0	0	0
ENSG00000086570.13|FAT2	0.015004	0	0.017513	0	0	0	0	0	0.018717	0	0.006563	0	0	0	0	0.014086
ENSG00000086589.12|RBM22	43.5296	42.9333	51.723	45.2167	49.0304	43.8088	47.9424	45.4747	47.4312	48.0505	49.5967	44.8657	44.7232	44.6007	37.8958	44.9378
ENSG00000086598.11|TMED2	170.167	169.524	153.73	170.605	169.661	170.432	164.655	166.068	215.376	214.918	219.744	208.378	217.484	221.797	204.256	224.799
ENSG00000086619.14|ERO1B	2.81267	2.71095	2.45989	2.91802	3.22188	2.91878	2.98371	3.36431	1.17695	1.81513	1.328	1.80393	2.01017	1.27512	1.85716	2.50987
ENSG00000086666.19|ZFAND6	74.0979	79.3775	85.8809	96.1648	90.3623	94.7981	90.0216	80.3005	57.1883	61.9624	50.5451	55.0255	58.2333	60.4889	61.3228	65.1496
ENSG00000086696.11|HSD17B2	20.3681	19.0434	18.6835	17.8733	17.2333	16.6384	14.1567	16.0422	1.10559	1.16904	1.09972	1.18819	1.31753	0.979864	0.67205	0.727545
ENSG00000086712.13|TXLNG	9.23302	6.52396	10.7982	9.80838	9.40308	9.83366	10.4032	10.4039	6.504	7.02775	6.0946	6.01415	6.00745	6.47069	5.83054	5.80099
ENSG00000086717.18|PPEF1	0	0	0	0	0	0	0	0	0	0	0	0	0	0	0	0
ENSG00000086730.17|LAT2	1.05676	0.764523	3.15564	0.975789	0.347998	1.66423	1.52493	0.994855	0.058339	1.10601	0.176167	0.116411	0.132565	0.328744	0.685315	0.2609
ENSG00000086758.16|HUWE1	61.5457	57.7052	71.7887	72.6785	69.9822	71.2601	73.7044	69.0599	96.2088	81.7812	76.2459	72.8378	109.813	111.081	87.295	102.279
ENSG00000086827.9|ZW10	15.9815	17.0123	13.5038	16.7774	16.4839	14.189	18.9526	18.6341	19.2586	20.8125	23.519	21.9844	21.4809	22.2959	18.1303	23.9529
ENSG00000086848.15|ALG9	16.0406	10.9429	10.1508	12.9281	14.455	12.8951	13.3218	14.4264	10.5214	15.7933	17.1277	12.2013	12.6495	14.8526	11.9826	16.522
ENSG00000086967.10|MYBPC2	0	0	0	0	0	0	0	0.008177	0	0	0	0	0	0	0	0
ENSG00000086991.13|NOX4	20.341	16.2276	15.7098	16.5483	24.0318	23.4644	19.5655	20.3962	5.42857	7.94109	4.52681	7.36843	9.04204	5.70885	7.27953	8.60926
ENSG00000087008.16|ACOX3	15.1981	15.7562	17.4064	14.8861	15.8954	11.8157	13.7606	15.4718	19.8023	23.2891	22.5771	23.0952	23.8664	22.7904	18.8586	23.4205
ENSG00000087053.20|MTMR2	32.3576	33.7165	36.6718	37.8706	32.5213	33.0465	32.8161	36.3439	38.1438	36.2497	43.736	39.9874	40.3252	43.3894	36.8242	45.4029
ENSG00000087074.8|PPP1R15A	205.829	192.658	187.13	177.054	200.471	195.592	218.649	218.092	117.985	125.407	113.068	121.026	113.866	126.433	119.601	114.813
ENSG00000087076.9|HSD17B14	76.1596	64.9807	74.0792	64.6936	77.2467	71.5469	87.8154	79.0161	20.3163	28.0679	21.4409	23.5763	23.871	25.5985	30.0436	27.224
ENSG00000087077.14|TRIP6	137.901	134.491	142.933	135.811	148.974	146.455	166.677	152.998	152.888	172.34	151.625	158.634	146.195	150.502	164.382	155.878
ENSG00000087085.16|ACHE	14.1509	12.9139	13.2626	16.8793	17.6529	18.1163	16.9079	14.1561	1.53569	2.58853	1.04817	2.44966	4.06431	3.52065	4.50767	4.22229
ENSG00000087086.15|FTL	8513.14	8787.47	8031.01	7899.93	7168.5	7550.55	7479.08	7775.54	7136.63	7034.11	6864.01	6528.68	6010.26	5859.39	6031.48	5872.28
ENSG00000087087.20|SRRT	77.1412	82.7726	82.8065	98.6139	99.4574	101.103	106.952	107.438	78.6678	85.246	74.3882	82.9326	72.2393	73.431	80.0935	84.613
ENSG00000087088.20|BAX	226.879	196.216	223.935	239.129	258.661	233.804	229.43	237.559	234.237	247.076	203.806	222.787	208.925	232.861	236.671	212.862
ENSG00000087095.13|NLK	24.198	24.7542	24.3113	26.5923	28.1983	24.7951	26.5997	27.3191	17.2661	18.7722	14.744	15.1887	16.5512	17.8639	17.4096	17.5116
ENSG00000087111.21|PIGS	40.7898	42.2719	38.7384	39.0532	49.3331	45.5896	51.0458	45.4777	41.9151	37.8809	36.9738	39.0153	45.083	46.0078	38.9142	43.0451
ENSG00000087116.16|ADAMTS2	0	0.029885	0	0.051416	0.208065	0	0.055627	0	0.263297	0	0.146256	0.073989	0.101354	0.125289	0	0
ENSG00000087128.10|TMPRSS11E	0	0	0	0	0	0	0	0	0	0.199019	0	0	0	0	0	0
ENSG00000087152.16|ATXN7L3	47.8231	43.531	55.5773	46.3414	55.0847	49.7212	50.4971	55.4549	32.4626	34.8095	31.5503	35.7601	34.5481	37.5572	30.3087	38.2666
ENSG00000087157.19|PGS1	49.2323	46.7907	53.7954	53.6861	58.1735	57.3755	55.7286	51.864	26.6433	36.5323	21.3201	27.4198	26.2585	25.1585	28.883	30.3668
ENSG00000087191.13|PSMC5	137.136	141.072	116.727	141.449	133.49	140.833	126.977	134.616	182.133	150.802	185.084	180.67	141.029	148.029	151.993	143.561
ENSG00000087206.17|UIMC1	31.1516	37.6436	33.3054	35.8338	34.659	40.8645	38.226	38.0518	27.2096	30.5237	28.6579	28.1954	24.8992	31.4775	31.9109	34.4907
ENSG00000087237.12|CETP	4.7283	1.77225	3.07564	5.02795	5.07056	4.67875	5.80369	3.29383	0	0	0.662325	0.216023	0.194253	0.119502	0	1.25059
ENSG00000087245.13|MMP2	297.326	266.24	283.314	270.918	309.94	322.872	335.325	317.001	255.655	260.794	257.153	272.596	329.784	367.124	304.938	369.265
ENSG00000087250.9|MT3	1.6461	0	3.09785	0.066882	0.79801	0.139623	0.123684	0.17485	0	0.485192	0.478412	3.31971	1.25696	3.62582	8.25593	2.22869
ENSG00000087253.13|LPCAT2	35.4706	33.8698	34.1855	41.3056	39.7554	45.1434	43.9068	41.9504	18.0347	23.4207	21.126	18.6345	21.2376	21.7604	21.3041	25.9075
ENSG00000087258.16|GNAO1	0.150589	0.058771	0.08258	0.080845	0.124668	0	0	0	0	0.186813	0.032951	0	0.029259	0	0	0
ENSG00000087263.17|OGFOD1	29.109	28.5574	31.0827	28.7346	29.3288	28.8913	29.7775	33.6485	34.4907	32.8939	31.3721	31.8037	30.7479	28.2877	27.8598	29.4039
ENSG00000087266.17|SH3BP2	39.2238	33.9029	42.3152	46.1908	48.6891	46.7451	43.3507	46.7502	26.3168	36.048	25.3596	27.1313	25.6816	32.5272	30.3236	37.0612
ENSG00000087269.16|NOP14	34.5283	35.8578	44.3068	38.7385	41.8042	40.0671	40.5811	43.7513	62.943	56.5535	59.8049	59.2287	55.2378	54.6087	47.4906	49.7078
ENSG00000087274.18|ADD1	157.985	142.691	146.222	151.111	164.812	166.196	166.754	155.052	138.185	155.24	131.013	135.45	143.485	158.44	144.669	161.966
ENSG00000087299.12|L2HGDH	1.37734	2.49735	2.06165	2.27794	0.8617	1.94365	1.58862	2.48832	3.50282	3.50984	2.29958	2.08094	2.29663	2.30449	2.02855	2.02824
ENSG00000087301.9|TXNDC16	3.49485	3.31428	3.40606	2.48637	5.62982	5.37538	5.08597	3.46762	3.11886	2.68296	3.18093	3.45076	4.14234	4.29829	3.86477	4.30384
ENSG00000087302.9|RTRAF	61.4693	65.3632	65.8373	58.6201	69.0525	32.4322	70.3303	72.7	76.2387	42.8241	77.9898	33.8005	73.1912	57.5316	93.9744	71.6766
ENSG00000087303.18|NID2	108.009	93.4736	106.927	101.951	136.919	126.752	147.019	137.459	10.1192	8.28397	8.65386	8.11256	8.39715	8.17878	7.65088	7.86267
ENSG00000087338.5|GMCL1	8.76558	9.63827	10.6838	11.8647	12.0887	11.8801	11.8997	11.3301	8.62419	7.52002	9.08978	7.48989	9.14236	9.11879	7.88302	7.53902
ENSG00000087365.16|SF3B2	142.518	127.862	152.883	138.507	162.284	183.692	157.348	144.19	177.194	165.649	166.078	165.093	159.257	202.418	150.94	156.381
ENSG00000087448.11|KLHL42	17.7571	15.7907	19.7044	19.419	18.8995	17.7899	22.0839	21.4646	12.3162	12.6112	11.8808	12.8865	11.4695	12.9022	11.6229	12.7667
ENSG00000087460.29|GNAS	648.156	572.108	648.911	630.5	647.929	620.358	672.225	646.245	876.917	965.464	1063.36	901.872	912.997	1076.45	885.654	877.326
ENSG00000087470.19|DNM1L	48.7815	46.7828	43.724	55.6977	50.0449	60.9215	58.7388	62.6116	42.6986	51.727	45.8614	47.6098	44.3609	49.8743	48.675	56.8554
ENSG00000087494.16|PTHLH	8.42538	4.01366	3.70324	2.74178	2.57079	6.10127	4.65343	8.71504	3.3819	2.35517	2.33681	2.92964	3.4292	2.21079	1.4741	2.76596
ENSG00000087495.17|PHACTR3	0.068608	0	0	0	0	0	0	0	0	0	0	0	0	0	0	0.098527
ENSG00000087502.18|ERGIC2	19.3599	17.8942	16.942	19.4961	19.5221	19.183	21.5	18.1992	14.7282	14.2918	15.8603	15.4528	16.7246	16.4143	15.3575	17.1734
ENSG00000087510.7|TFAP2C	0.097129	0	0	0	0	0	0	0.044034	0	0	0	0	0	0	0	0
ENSG00000087586.18|AURKA	3.32765	4.35795	1.20969	3.4722	3.91526	5.49762	4.62022	5.22938	19.4601	19.5535	17.2793	20.4531	16.1212	14.5691	9.34613	8.46767
ENSG00000087589.17|CASS4	0	0.067949	0	0	0.139486	0.219331	0	0	0.025334	0.051614	0.02487	0	0.080447	0	0.061736	0
ENSG00000087842.11|PIR	62.5356	69.6882	60.4717	66.5277	68.5815	66.3447	70.4665	59.4731	38.0406	50.6564	38.3993	45.3182	31.5838	32.1536	29.3747	24.5698
ENSG00000087884.14|AAMDC	83.9887	80.3397	76.1102	75.2504	87.1889	94.8555	82.0345	69.1273	77.0123	66.5091	68.9608	79.0563	67.1074	69.0045	86.0306	77.3428
ENSG00000087903.13|RFX2	8.59784	9.83127	10.1314	8.40259	6.8813	8.89152	7.10513	7.36539	6.94043	12.2774	6.64989	5.46911	12.0343	10.7969	16.606	14.0994
ENSG00000087995.16|METTL2A	12.5738	11.5175	13.5027	14.7839	14.1198	12.7091	11.4001	10.9576	18.8195	14.9396	16.4228	19.9658	11.4097	13.4703	15.2275	14.3048
ENSG00000088002.12|SULT2B1	0.499147	0.366913	0	0.356343	0	0.299617	0	0.39038	0	0	0	0	0	0	0	0
ENSG00000088035.18|ALG6	7.14386	9.13954	7.06483	9.53948	10.3141	11.507	8.96159	11.9318	7.74349	13.1054	9.32186	7.07475	9.83693	9.65722	8.23585	6.84249
ENSG00000088038.19|CNOT3	28.7895	27.8887	37.3384	26.0413	29.1733	33.0043	37.868	33.7962	31.0709	30.6493	31.0864	26.8096	25.8902	25.8647	25.5124	30.4005
ENSG00000088053.11|GP6	0	0	0	0	0	0	0	0	0	0	0	0	0	0	0.076127	0
ENSG00000088179.9|PTPN4	6.23862	5.38442	5.72935	5.85139	5.98067	4.91766	6.03805	5.98205	2.71984	3.03446	2.49754	2.10073	2.93742	1.96182	2.75599	2.86097
ENSG00000088205.13|DDX18	37.0322	31.3529	39.0659	38.5438	42.8771	33.4799	41.1897	37.5245	39.4066	37.6829	39.9487	37.159	38.596	37.7742	31.6063	38.9336
ENSG00000088247.18|KHSRP	129.118	119.811	134.858	113.764	142.723	134.533	138.668	142.305	155.544	136.922	151.684	137.364	130.468	140.603	121.502	141.352
ENSG00000088256.9|GNA11	105.348	97.8081	106.255	98.5307	109.415	101.795	109.665	102.551	97.5104	95.1922	94.508	90.2214	98.7265	103.785	92.3438	96.2472
ENSG00000088280.19|ASAP3	16.7639	14.5871	13.0928	18.9832	17.5323	15.6994	18.0327	17.6479	1.94606	1.60477	2.29919	2.46756	3.24998	4.42812	3.21307	3.52375
ENSG00000088298.13|EDEM2	56.0828	54.9898	54.3433	47.4156	61.5797	58.6285	49.405	49.6015	40.4995	38.7664	36.5824	40.4552	34.7782	41.0084	43.3812	39.7414
ENSG00000088305.18|DNMT3B	1.75379	2.30316	2.47506	2.47452	3.19956	1.62387	1.63096	3.00154	1.41257	1.2281	1.15484	1.15845	1.07345	1.1383	1.33734	1.43528
ENSG00000088320.4|REM1	0	0	0	0	0	0	0.076359	0.349375	1.33336	0.533353	1.22385	0.774623	0.385966	1.11734	0.447204	0.875016
ENSG00000088325.16|TPX2	3.35332	3.56344	2.75245	3.84324	3.16877	5.02648	4.51112	3.8805	39.9214	37.9622	39.8853	34.964	27.6899	27.7671	17.0764	18.5739
ENSG00000088340.17|FER1L4	14.0772	9.98203	27.0305	28.4385	27.1155	24.7637	24.8316	22.975	1.10356	2.69507	0.410365	1.17669	2.84875	2.80051	4.22783	8.76678
ENSG00000088356.6|PDRG1	22.7299	20.211	24.4462	23.8137	28.4501	26.2011	25.5444	26.5475	19.9712	22.2984	19.1852	25.8685	16.0383	19.9496	22.5087	17.9617
ENSG00000088367.23|EPB41L1	16.7512	20.8394	15.7063	14.2739	19.3383	16.8614	15.1987	15.311	10.4548	10.0808	9.91998	10.1958	14.5352	13.1511	13.9252	18.4839
ENSG00000088386.17|SLC15A1	0	0.114622	0.51062	0	0	0	0	0	0.195492	0	0.254211	0.125915	0.161773	0	0.192889	0
ENSG00000088387.20|DOCK9	67.9058	69.8066	74.4307	75.493	90.7852	83.5918	95.8959	95.6126	52.4491	57.3494	46.4371	51.4248	64.3588	65.5087	54.105	56.4033
ENSG00000088448.14|ANKRD10	120.312	105.743	98.8069	135.287	118.987	142.16	145.292	148.606	28.9025	63.8623	27.4585	34.6773	46.9161	48.4668	49.2196	67.7855
ENSG00000088451.11|TGDS	7.95289	9.27123	10.5194	11.7451	10.3484	11.1655	15.0036	14.7993	8.96919	12.8341	8.13386	10.8475	9.18606	11.0847	8.98078	10.471
ENSG00000088538.13|DOCK3	0.422256	0.14699	0.036614	0.496226	0.463475	0.250842	0.351488	0.218896	0.123813	0.037821	0.133123	0.085671	0.03712	0.069508	0.184349	0.112479
ENSG00000088543.15|C3orf18	8.40927	6.99784	6.87733	8.8409	8.05449	9.18399	13.4973	11.242	5.97215	7.04759	7.869	6.85214	7.35731	7.93653	9.43071	8.65397
ENSG00000088682.14|COQ9	39.9765	44.2111	42.1182	41.2745	40.1716	38.0646	42.6646	48.4539	46.0941	47.9608	43.3376	43.0855	34.2932	36.262	35.7279	41.4496
ENSG00000088726.16|TMEM40	0	0	0	0	0	0	0	0	0	0.190555	0	0	0	0	0.268326	0
ENSG00000088727.14|KIF9	7.11122	8.41024	5.17276	5.21215	15.7379	4.85168	4.33787	7.57353	6.58469	6.31719	6.56788	10.9587	9.16452	8.18076	8.54298	11.355
ENSG00000088756.13|ARHGAP28	0	0.028082	0.044022	0.043696	0.257651	0.017398	0	0.076848	0.085454	0	0.029683	0.0705	0.123347	0.167467	0.136571	0.082709
ENSG00000088766.12|CRLS1	20.4103	19.1631	18.0677	26.4391	14.698	26.2628	25.4893	23.7799	22.3618	24.8799	19.2687	24.9455	19.6005	14.788	22.6455	18.1591
ENSG00000088782.5|DEFB127	0	0	0	0	0	0	0	0	0	0	0	0	0	0	0	0
ENSG00000088808.18|PPP1R13B	23.8894	21.1161	25.1234	23.6503	24.4627	26.1219	28.9778	24.9771	12.5881	17.4942	12.5752	11.7426	12.2602	14.4937	12.6586	14.1907
ENSG00000088812.18|ATRN	27.164	23.1257	31.489	29.4621	31.6811	30.0522	30.5775	33.7682	25.5252	24.1451	23.4245	27.3293	33.0199	35.8013	30.1839	35.4713
ENSG00000088826.18|SMOX	16.6716	14.5469	13.5247	15.0208	14.5418	14.3099	13.5503	15.2624	12.6511	12.5219	11.7643	11.7173	14.7427	15.5446	14.051	15.8591
ENSG00000088827.13|SIGLEC1	0	0	0	0	0	0	0	0	0	0.041274	0	0	0	0	0	0
ENSG00000088832.18|FKBP1A	1086.54	1021.5	1205.22	1237.01	1264.41	1214.42	1163.15	1170.75	1519.06	1463.82	1423.64	1444.93	1823.87	1628.67	1487.13	1405.03
ENSG00000088833.18|NSFL1C	76.1924	66.749	89.6848	76.2744	73.5384	84.381	70.2035	74.7714	67.2891	69.7641	67.3592	63.9829	62.0968	62.6719	67.959	64.3591
ENSG00000088836.14|SLC4A11	24.4751	15.7518	15.7167	19.1413	12.7936	21.279	19.0236	24.2174	6.84197	8.61752	7.941	6.61046	4.2543	8.29079	8.06215	9.60769
ENSG00000088854.13|C20orf194	19.8715	17.5859	21.3773	20.6091	23.911	22.3138	23.368	23.1489	9.67583	10.7035	8.56846	8.61506	10.4521	12.2203	12.5351	12.2854
ENSG00000088876.13|ZNF343	7.2345	8.15215	10.8565	10.3469	10.0927	10.4555	12.0145	9.68873	7.9302	9.01947	7.19385	8.38098	7.92162	8.02425	9.34181	8.3553
ENSG00000088881.21|EBF4	1.68016	2.78561	4.00022	2.11116	2.51936	2.84503	2.70856	2.27329	0.445186	0.487282	0.910667	1.1903	1.57397	1.30582	1.37395	0.683214
ENSG00000088882.8|CPXM1	0	0.0949	0	0	0	0.399818	0	0	0	0	0.174984	0	0	0.268778	0	0
ENSG00000088888.18|MAVS	38.1251	33.0953	42.1064	40.9108	39.76	41.7742	39.7041	40.7288	49.3111	49.1121	40.6158	46.4223	44.6347	48.776	46.2911	46.3769
ENSG00000088899.16|LZTS3	17.1248	16.1791	13.3624	11.2326	15.7621	14.4973	19.9512	20.3125	6.30891	5.03719	5.06517	5.32095	6.09129	8.13677	7.01635	7.02094
ENSG00000088926.14|F11	0	0	0	0	0	0	0.041725	0	0	0	0	0	0	0	0	0
ENSG00000088930.8|XRN2	49.4588	51.0532	45.1473	52.477	58.0938	51.596	57.4847	57.3399	61.868	57.4411	62.4474	53.8069	65.4761	61.7403	52.1554	65.5774
ENSG00000088970.16|KIZ	8.992	7.48499	11.7195	8.95747	8.44388	7.10832	9.26842	8.70497	6.10489	6.82197	6.40748	6.42884	4.80579	5.03981	6.41897	5.87786
ENSG00000088986.11|DYNLL1	398.75	420.662	348.597	417.56	373.44	423.36	394.416	407.594	793.606	727.425	803.82	789.377	764.035	724.013	722.764	699.739
ENSG00000088992.18|TESC	0.866928	0	0	0	0	0	0.727875	0.597328	0	0	0	0	0	0	0	0
ENSG00000089006.17|SNX5	48.8692	45.8476	44.6966	51.9257	53.4402	56.2371	58.7259	60.6916	60.354	80.9008	64.1212	64.2629	58.3368	63.0879	55.5266	55.4843
ENSG00000089009.16|RPL6	777.124	757.249	783.055	897.722	815.093	823.099	909.034	868.518	1429.23	1608.44	1465.58	1536.51	1415.83	1333.27	1441.31	1390.03
ENSG00000089012.14|SIRPG	0	0	0	0	0	0	0	0	0	0	0	0	0	0	0	0
ENSG00000089022.14|MAPKAPK5	19.2313	14.3856	14.5632	16.8276	18.0197	15.6234	14.3863	17.9856	8.93857	16.4375	8.72942	10.6619	8.90868	8.1876	12.1782	13.6534
ENSG00000089041.17|P2RX7	7.63014	6.85207	10.3938	6.34891	6.49538	7.51911	6.68815	9.40284	4.10999	3.66452	3.76469	4.04839	5.92334	5.07555	4.15944	4.12355
ENSG00000089048.15|ESF1	17.0213	15.6809	16.5512	19.4137	19.6839	18.4986	21.7971	19.8988	10.5609	13.7111	10.6667	9.82417	7.5966	9.78893	12.1663	12.3015
ENSG00000089050.16|RBBP9	11.9187	10.3327	9.07511	11.4522	10.8472	9.03225	10.3573	10.3822	9.9154	9.08512	10.1782	9.73117	9.996	8.10528	8.10809	10.2556
ENSG00000089053.13|ANAPC5	87.8424	80.3175	101.272	108.928	109.099	113.123	117.301	108.237	89.4721	109.003	93.8814	100.665	92.5655	97.3772	96.4377	106.553
ENSG00000089057.15|SLC23A2	12.358	11.8778	16.5181	16.4523	14.7767	16.4183	18.0224	18.6106	10.9816	9.38842	9.42108	9.421	10.1237	11.1321	9.64782	11.7544
ENSG00000089060.12|SLC8B1	39.7007	35.0283	35.3847	36.0457	37.1024	38.3463	43.2396	41.6218	23.4567	17.5716	17.0083	16.6465	17.2298	18.169	16.7208	18.1357
ENSG00000089063.15|TMEM230	99.7812	101.971	95.28	112.429	108.427	103.609	110.014	109.447	133.17	141.712	137.961	133.024	140.136	136.669	133.769	130.971
ENSG00000089091.16|DZANK1	1.55308	2.78852	2.37654	2.63353	1.79405	1.98033	2.97553	4.27438	0.814218	1.409	1.3979	0.892328	0.847751	0.889179	1.33391	1.03011
ENSG00000089094.19|KDM2B	10.8826	10.3731	9.55811	10.927	12.5329	13.6837	12.7485	11.56	12.3804	13.4018	9.61587	12.0489	14.0657	14.1057	17.1879	17.4912
ENSG00000089101.19|CFAP61	0	0	0	0	0	0	0	0	0	0	0	0	0	0	0	0
ENSG00000089116.4|LHX5	0	0	0	0	0	0	0	0	0	0	0	0	0	0	0	0
ENSG00000089123.16|TASP1	5.07604	5.22708	5.48108	5.47595	5.53857	5.53789	8.10174	5.89802	4.87904	4.07481	5.19164	4.77026	4.5332	7.52628	5.31869	7.74094
ENSG00000089127.15|OAS1	93.7448	106.208	92.0056	92.5616	98.5831	103.788	85.5063	91.8732	105.711	145.792	133.072	136.997	165.599	165.825	129.546	125.421
ENSG00000089154.11|GCN1	48.8946	48.5765	52.5179	48.8357	50.6664	54.1486	58.7933	55.2167	55.5793	60.3066	49.7035	49.7479	55.1022	59.5099	56.0327	64.6934
ENSG00000089157.16|RPLP0	1395.14	1463.76	1810.05	1467.16	1385.98	1499.68	1533.43	1633.84	2882.17	2886.24	2895.38	3113.67	3237.72	2831.2	2774.65	3136.76
ENSG00000089159.17|PXN	302.165	262.75	310.635	267.527	341.252	266.588	353.406	279.614	286.874	263.441	230.588	242.67	365.183	387.124	342.76	400.624
ENSG00000089163.4|SIRT4	2.25061	1.59409	1.03443	3.145	3.34026	3.15283	5.6398	3.54995	0.976513	2.31588	1.11575	2.21965	1.47783	1.01288	1.6687	2.78705
ENSG00000089169.15|RPH3A	0	0	0	0.041568	0.170447	0.133876	0	0	0	0	0.044194	0	0	0	0	0
ENSG00000089177.19|KIF16B	6.32161	7.11041	7.6852	7.85153	7.85385	7.2937	9.20784	7.29201	6.93599	5.89011	7.19656	6.55617	7.43902	7.70655	7.21575	7.8034
ENSG00000089195.15|TRMT6	7.64163	7.68702	7.84148	9.11096	12.8511	8.74501	9.72092	8.84074	12.2722	9.85496	10.2803	12.0465	9.12293	8.67443	9.49713	9.36752
ENSG00000089199.10|CHGB	0.21447	0.34647	0	0.132559	0.201808	0.051362	0.204147	0.128606	0.562744	0	0.131556	0.193489	0.177789	0.252351	0.069781	0.235015
ENSG00000089220.5|PEBP1	171.439	171.764	169.531	172.764	180.068	185.607	188.693	183.753	212.352	209.244	226.456	226.578	234.657	209.399	215.046	230.857
ENSG00000089225.20|TBX5	0	0	0	0	0	0	0	0	0	0	0	0	0	0	0	0
ENSG00000089234.16|BRAP	19.8082	17.5667	20.5329	22.3912	18.1951	20.9321	19.1309	22.868	16.3275	14.3859	15.8004	14.1467	15.0859	15.5442	14.5816	15.1921
ENSG00000089248.7|ERP29	152.198	156.314	141.721	138.299	159.556	162.484	151.519	153.451	104.978	92.4546	95.1541	107.15	90.1031	91.8197	98.5551	94.8973
ENSG00000089250.19|NOS1	0	0	0.045433	0.04569	0.12961	0.010295	0	0	0	0	0.016227	0.193552	0.013669	0	0.023103	0.0163
ENSG00000089280.19|FUS	128.806	121.046	140.095	144.031	145.976	143.027	170.694	151.685	269.661	246.019	256.488	263.394	238.926	251.643	270.777	227.255
ENSG00000089289.16|IGBP1	44.2815	44.6843	60.3191	46.2237	50.159	46.0519	48.579	49.58	44.3203	44.6874	44.0469	47.6666	44.5447	43.5456	45.3449	39.827
ENSG00000089327.15|FXYD5	212.023	220.49	228.297	227.249	224.009	241.003	249.604	206.589	322.441	325.011	317.095	351.237	271.181	291.17	314.383	254.351
ENSG00000089335.21|ZNF302	23.8647	19.2476	25.1157	23.2034	25.9853	24.9835	25.3416	24.5186	12.0565	14.6889	9.71137	11.9552	13.1317	11.1116	12.3069	13.3124
ENSG00000089351.15|GRAMD1A	104.007	93.5052	104.383	96.9285	110.279	110.767	100.93	108.522	56.1493	66.154	57.5411	58.0654	62.5119	62.543	68.0448	65.2062
ENSG00000089356.19|FXYD3	0	0.170278	0	0	0	0	0	0	0.100598	0	0	0	0	0	0	0
ENSG00000089472.17|HEPH	0.085324	0	0.023653	0	0.098131	0	0	0	0.203058	0.300315	0.1217	0.26548	0.178067	0.104462	0.215282	0.129154
ENSG00000089486.17|CDIP1	53.4683	51.6855	57.9426	54.4924	54.5829	50.0079	52.6973	49.5457	45.1388	50.7864	45.0484	44.7524	45.4114	47.2747	46.93	42.593
ENSG00000089505.18|CMTM1	4.4057	5.90971	3.16406	4.43858	6.52661	0	6.84303	6.60494	3.17153	0	2.4578	2.70057	1.58089	2.47082	3.4171	2.25398
ENSG00000089558.9|KCNH4	0.252499	0.137771	0	0.119943	0	0.140505	0.483291	0.179092	0	0.056876	0	0	0.110482	0.117014	0.280022	0
ENSG00000089597.18|GANAB	230.366	223.942	239.473	235.32	278.572	251.295	278.401	253.054	217.456	208.235	211.271	217.581	243.878	258.528	239.188	257.88
ENSG00000089639.11|GMIP	19.647	15.7697	17.0017	14.9047	21.3353	20.6834	22.1362	20.9704	15.1056	16.1365	14.8777	14.8028	14.9067	17.2472	18.2714	20.1114
ENSG00000089682.16|RBM41	10.3858	10.0343	9.74385	11.7117	6.77275	11.2708	10.9836	10.9821	5.85661	8.43712	5.12091	5.23912	5.80271	6.81045	7.07052	7.91556
ENSG00000089685.15|BIRC5	0.176008	0.199826	0	0	0	0.298894	0.328921	0.250702	20.1195	18.9058	15.7295	17.6678	11.1279	10.8621	5.1602	3.46326
ENSG00000089692.9|LAG3	0.325686	0.888732	0.657054	0.490514	0.591394	0.900367	0.283501	1.21889	0	1.09281	0	0.157058	0	0.208365	0	0.112991
ENSG00000089693.11|MLF2	139.948	126.529	125.915	151.349	155.618	141.465	156.468	137.26	142.397	138.088	139.494	144.71	149.561	152.776	144.002	149.809
ENSG00000089723.10|OTUB2	2.63796	1.96717	1.53015	2.54266	1.7026	2.91122	1.94592	1.83882	1.98705	2.26972	2.81589	2.06774	2.49524	2.38915	2.49555	2.99494
ENSG00000089737.17|DDX24	101.602	88.3378	100.531	86.2683	101.158	97.5993	107.898	90.2575	80.9668	94.0193	76.209	90.7113	80.8602	78.6485	79.5205	87.4784
ENSG00000089775.12|ZBTB25	5.45834	5.32535	6.60461	7.7971	6.48738	8.22776	6.90311	6.16525	3.662	4.92195	3.86072	3.50329	3.92085	4.70203	5.46396	4.13896
ENSG00000089818.18|NECAP1	18.999	18.0815	25.8083	16.8296	20.7221	22.896	16.3408	18.979	23.2428	21.9109	21.6506	20.6401	15.3732	22.2474	17.3811	19.1793
ENSG00000089820.16|ARHGAP4	13.0157	14.5216	20.7909	15.4989	24.6496	19.0184	13.9478	16.258	5.6765	12.1491	5.35997	7.69539	5.37925	6.7468	5.57324	7.37967
ENSG00000089847.12|ANKRD24	1.4304	1.85009	3.29757	2.82409	2.12267	1.79923	1.63656	2.61322	0.723847	1.55133	0.556315	1.24852	0.688678	0.827953	0.699964	1.02552
ENSG00000089876.12|DHX32	33.5281	27.1617	34.4463	31.697	36.677	32.2196	34.1849	33.9022	27.2474	25.586	28.2991	28.8233	30.703	30.0946	32.8158	32.5594
ENSG00000089902.10|RCOR1	18.6116	16.7491	20.8463	19.4745	22.1684	19.3704	17.6229	19.1842	18.0275	18.3132	16.6006	16.0781	20.2385	19.8044	18.7467	25.7243
ENSG00000089916.18|GPATCH2L	20.1053	20.0108	22.2015	24.7777	20.7481	23.3237	27.5329	25.5262	12.4095	13.9951	11.1312	9.79924	14.4695	15.7373	15.893	19.8063
ENSG00000090006.18|LTBP4	24.8228	14.6845	14.9859	18.0435	19.5705	17.2512	21.8153	22.5937	24.858	36.525	23.2559	26.9456	25.0033	28.9116	28.9657	30.3682
ENSG00000090013.11|BLVRB	120.731	134.763	144.699	117.097	125	120.502	113.362	110.696	156.991	162.048	165.73	165.517	157.756	150.91	162.125	160.123
ENSG00000090020.11|SLC9A1	86.1427	85.1018	86.5152	81.3747	96.4915	87.9819	86.8592	87.0737	62.8986	58.3991	60.9691	55.362	53.9301	57.0648	48.4189	58.7005
ENSG00000090054.15|SPTLC1	66.5375	69.4054	68.3484	68.8447	79.1595	79.0873	74.3405	69.1744	57.6465	71.45	58.3232	59.5556	75.0121	65.3384	68.3781	80.2519
ENSG00000090060.19|PAPOLA	85.645	79.8088	83.018	100.144	86.3088	97.8456	92.409	92.5724	76.1142	79.752	77.2848	72.4249	86.4328	82.3028	79.0303	86.7184
ENSG00000090061.17|CCNK	51.5142	38.2714	44.1791	45.8068	46.9311	49.7895	52.9471	48.887	46.375	47.1253	51.7552	44.1344	52.1645	54.026	48.8556	54.5797
ENSG00000090097.22|PCBP4	33.0995	30.4909	40.2707	32.199	38.6913	40.0554	36.6836	34.6661	50.0571	49.4226	47.3067	43.4615	48.7645	54.4418	55.3576	52.0741
ENSG00000090104.12|RGS1	0	0	0	0	0	0	0	0	0	0	0	0	0	0	0.387826	0
ENSG00000090238.12|YPEL3	47.0285	44.2611	62.6683	56.0402	60.5687	74.849	68.0333	59.4076	27.1625	29.2188	25.4703	29.0148	31.5235	27.838	38.2975	31.0852
ENSG00000090263.16|MRPS33	18.008	19.7933	17.8131	19.7628	20.8467	14.0784	23.9618	15.0117	31.8304	27.3339	29.9405	35.4778	24.6989	38.6776	28.2973	31.7875
ENSG00000090266.13|NDUFB2	145.371	175.995	153.662	145	157.152	159.303	143.544	138.084	212.46	205.473	183.504	228.939	198.394	197.551	226.185	194.476
ENSG00000090273.14|NUDC	170.285	171.572	180.432	173.433	169.238	152.77	165.423	172.478	214.533	198.383	234.183	214.719	176.968	174.022	180.468	166.59
ENSG00000090316.16|MAEA	54.575	49.5616	56.326	53.368	63.6532	64.128	66.8618	64.4744	75.6933	65.2008	57.3047	66.9848	59.0291	68.4475	61.2811	59.7429
ENSG00000090339.9|ICAM1	407.909	390.135	381.451	355.158	442.622	446.742	456.347	455.544	290.527	295.526	289.661	320.23	342.497	383.133	383.587	393.512
ENSG00000090372.15|STRN4	110.479	96.4441	126.144	102.108	103.461	106.637	109.959	112.993	75.8504	77.1133	70.8987	71.4723	70.1609	68.0084	66.9795	82.553
ENSG00000090376.11|IRAK3	16.0173	14.2493	14.4888	20.0351	16.1146	18.323	17.7805	17.9783	12.48	13.9475	11.2493	10.388	12.8233	14.1336	11.766	15.5575
ENSG00000090382.7|LYZ	0	0	0.563889	0	0	0	0.105175	0	0	0	0	0	0.342261	0	0	0
ENSG00000090402.8|SI	0	0	0	0	0	0	0	0	0	0.035836	0.017267	0	0	0	0	0
ENSG00000090432.7|MUL1	41.4846	38.7949	35.8246	34.2931	43.1233	38.634	42.554	36.741	37.1911	31.2207	32.4807	33.173	33.9577	35.2132	31.604	31.7607
ENSG00000090447.12|TFAP4	3.62153	3.55189	3.56518	4.14272	3.54889	3.85112	3.86364	4.40472	6.38168	6.90111	7.38334	7.01086	4.35584	5.80271	4.93616	5.91512
ENSG00000090470.15|PDCD7	20.4378	17.7284	17.8263	21.03	24.9882	19.3022	21.5045	22.9212	15.5166	15.081	14.1368	14.8911	13.6285	12.821	15.0309	16.1087
ENSG00000090487.11|SPG21	92.8709	90.3965	85.8384	81.8334	98.0222	95.193	88.1991	92.8852	119.648	130.927	107.666	94.229	98.9337	102.829	95.8642	104.973
ENSG00000090512.12|FETUB	0	0	0	0	0	0.021863	0	0	0	0.031764	0	0	0	0	0	0
ENSG00000090520.12|DNAJB11	48.1456	60.4864	45.5126	71.5754	96.5984	46.0803	51.2902	44.0044	36.1913	74.3177	52.4762	56.403	71.0749	49.5246	83.8035	45.4658
ENSG00000090530.10|P3H2	0.754258	1.07548	1.3465	1.77486	0.711019	1.54622	3.41264	1.60971	0.171658	0.326425	0.174362	0.683091	0.473201	0.422865	0.148232	0.275383
ENSG00000090534.20|THPO	0	0	0	0	0	0	0	0	0	0	0	0	0	0	0	0
ENSG00000090539.15|CHRD	0.134017	0.120428	0	0.165613	0.197652	0.214305	0.213339	0	0	0	0	0	0	0.042574	0.066416	0
ENSG00000090554.13|FLT3LG	12.8862	9.08487	12.1679	11.4229	19.9671	16.4125	17.5173	15.1521	11.697	17.7651	13.0045	14.837	11.4702	13.7188	12.139	13.6187
ENSG00000090565.17|RAB11FIP3	79.1778	72.0399	97.1234	85.3437	73.2119	82.0357	85.0282	85.0002	44.6342	57.9649	41.6594	43.9795	45.0923	50.5999	45.657	58.5543
ENSG00000090581.11|GNPTG	128.352	116.526	105.599	114.389	133.946	138.43	145.687	129.696	77.6722	79.58	66.9731	90.1675	72.0244	79.3089	77.3811	87.2451
ENSG00000090612.22|ZNF268	6.20549	5.16072	6.91397	4.52278	5.60639	5.59137	6.18635	7.21425	4.66078	4.9763	3.99934	4.35024	4.98367	4.25667	4.93025	5.73697
ENSG00000090615.15|GOLGA3	68.5433	61.8484	73.3235	85.3561	93.1477	84.9206	88.6873	84.4087	57.9968	62.4276	40.7356	44.0057	62.32	65.9809	55.3305	66.3556
ENSG00000090621.15|PABPC4	135.087	126.751	147.941	142.825	151.145	135.426	155.158	147.308	237.013	222.853	256.729	231.804	231.758	249.156	218.826	254.596
ENSG00000090659.18|CD209	0	0	0	0	0	0	0	0	0	0	0	0	0	0	0	0
ENSG00000090661.12|CERS4	2.84209	5.34399	2.9233	3.17734	3.39487	2.76299	8.86207	2.36442	6.89242	7.33777	6.72943	7.58853	6.54858	7.09589	5.65965	6.44705
ENSG00000090674.16|MCOLN1	51.7613	54.1272	56.7161	54.9575	43.9033	64.6529	64.3104	65.206	44.897	47.1589	41.359	42.7115	42.4619	46.7836	48.3651	46.2143
ENSG00000090686.16|USP48	70.1355	62.1851	70.3095	76.5486	70.8936	79.4456	71.4318	73.3251	55.6904	74.5023	52.1754	63.0988	59.1003	60.129	65.2761	76.2598
ENSG00000090776.6|EFNB1	95.2322	89.6316	86.4929	81.1957	116.853	94.6038	100.169	106.879	67.2621	60.7516	65.8381	67.2793	64.4737	68.45	61.9664	65.5033
ENSG00000090857.14|PDPR	36.3029	24.2959	24.4772	28.798	29.3603	40.459	29.3511	28.5944	24.7575	20.5852	15.04	17.1688	17.9357	18.5014	16.6884	19.7321
ENSG00000090861.17|AARS1	112.183	110.252	126.76	97.5409	106.078	112.109	115.444	109.417	91.6153	92.413	82.0076	84.7568	81.1636	76.3197	70.9921	81.0643
ENSG00000090863.12|GLG1	98.2042	77.2608	89.5653	90.7897	100.095	93.0335	98.147	95.8955	65.1248	66.4008	57.8878	61.613	75.2041	79.0962	74.9491	81.6927
ENSG00000090889.12|KIF4A	0.234953	0.38152	0.692755	0.155605	1.02125	0.802742	0.373518	0.590265	8.06011	8.90411	8.40792	7.45023	5.56713	5.50362	2.26744	3.15418
ENSG00000090905.19|TNRC6A	37.4378	33.939	40.0411	44.0161	48.7117	44.3246	52.198	38.6247	22.6011	32.6382	19.168	22.4963	23.7053	26.7423	25.7497	35.6536
ENSG00000090924.15|PLEKHG2	26.1421	23.5237	30.9962	28.2406	28.4223	31.6715	35.112	31.6565	12.2535	20.5532	13.3837	13.9385	17.6192	17.0099	20.1393	22.0474
ENSG00000090932.11|DLL3	1.31601	0.498188	0	0.400347	0	0.510691	0.667879	0.301917	1.26638	0.957411	0.766028	0.638803	1.092	0.923485	1.23134	1.07029
ENSG00000090971.5|NAT14	34.8858	33.8408	25.628	32.9136	34.2047	34.6817	35.1317	39.8095	29.3125	31.6123	26.5348	26.87	24.0174	26.4809	33.5741	31.27
ENSG00000090975.14|PITPNM2	26.861	21.861	28.3813	28.8112	28.5912	27.0575	29.0317	27.9284	14.4073	18.8919	13.3494	13.2351	16.1015	17.9455	17.3742	20.3682
ENSG00000090989.18|EXOC1	40.0643	39.1638	38.6457	43.9717	41.8413	42.9038	46.198	45.9483	35.2143	37.4645	35.4134	35.8344	38.6067	40.4121	39.7674	44.2767
ENSG00000091009.8|RBM27	12.5664	12.2063	13.1023	15.429	12.0428	13.5516	14.2179	14.6162	11.8525	11.6342	13.8375	11.3094	12.7092	13.8382	10.6555	15.6464
ENSG00000091010.6|POU4F3	0	0	0.106071	0.125773	0	0	0	0	0	0.313469	0	0	0	0	0	0.07853
ENSG00000091039.17|OSBPL8	41.4964	28.0974	27.2461	30.7829	36.2532	29.77	31.6052	33.7774	21.8518	17.5553	25.2984	18.665	28.9226	32.2133	23.435	32.1353
ENSG00000091073.20|DTX2	16.756	15.9856	21.9726	17.5572	17.2711	19.6188	17.4691	18.0534	11.4332	15.1346	11.2814	11.4872	7.66694	12.8148	10.6511	14.0744
ENSG00000091106.19|NLRC4	0.100882	0.155669	0	0	0	0	0	0.195658	0.090856	0.080641	0.030542	0	0.089199	0	0	0
ENSG00000091127.14|PUS7	17.8759	11.1433	14.485	17.328	15.5235	13.3415	18.1501	16.7188	19.1354	20.8367	19.833	18.4946	24.0411	21.0586	20.6162	24.088
ENSG00000091128.13|LAMB4	0.291666	0.804955	1.6822	1.10886	0.619934	1.15013	0.824085	1.57621	0.112348	0.29956	0.06766	0.097386	0.511441	0.346308	0	0.240997
ENSG00000091129.21|NRCAM	125.951	116.381	132.909	157.529	154.767	147.895	145.766	146.979	166.573	179.836	177.232	166.816	241.034	244.712	211.206	263.899
ENSG00000091136.15|LAMB1	308.533	270.019	326.646	364.729	390.285	386.331	398.853	387.111	276.186	344.983	262.458	298.416	335.797	368.11	365.31	414.86
ENSG00000091137.14|SLC26A4	0.26816	0.380954	0.234735	0.427694	1.02025	0.939095	0.529848	0.501642	0.294918	0.097978	0.25411	0.301348	0	0.099456	0.158424	0.147717
ENSG00000091138.13|SLC26A3	0	0	0	0	0.158731	0	0	0	0	0	0	0	0	0	0	0
ENSG00000091140.14|DLD	52.5985	55.1536	39.6706	58.8768	53.0606	49.0098	54.8435	55.2241	42.4252	48.8428	48.7192	42.5378	44.8893	48.295	47.9781	52.1001
ENSG00000091157.14|WDR7	8.06385	7.62843	7.40207	8.02818	11.9544	8.61781	7.6787	9.71009	8.04841	7.74784	7.25339	6.86348	8.30828	7.40784	6.92079	9.23124
ENSG00000091164.13|TXNL1	28.554	28.5688	37.7323	27.9187	29.19	30.4725	27.3092	30.0245	25.8769	22.7108	42.3734	24.7859	41.4082	23.5443	24.7495	38.515
ENSG00000091181.20|IL5RA	0	0	0	0	0	0	0	0	0	0	0	0	0	0	0	0
ENSG00000091262.17|ABCC6	0.057696	0	0	0.049688	0.14163	0.052716	0	0	0.280691	0.170988	0	0.542856	0	0.696815	0.119347	0.406589
ENSG00000091317.8|CMTM6	104.142	101.391	95.9152	111.74	111.453	114.498	110.162	110.994	76.7785	76.2217	83.6774	76.7441	92.64	89.7853	82.0959	93.5143
ENSG00000091409.16|ITGA6	31.8883	31.8466	38.9031	39.8736	45.1856	44.1106	40.1394	42.7333	28.498	25.0524	31.164	29.2737	33.1309	34.3609	28.8107	33.1344
ENSG00000091428.18|RAPGEF4	2.44888	3.63868	2.80094	2.65842	3.00027	4.31378	2.89552	2.85543	2.30589	2.12099	1.69552	1.85961	2.00754	1.97899	1.95201	2.01058
ENSG00000091436.17|MAP3K20	7.32407	7.84448	7.08566	9.39867	8.91979	7.86308	8.12592	8.73598	16.4483	15.0134	15.1765	14.0149	16.6142	14.1312	13.4828	15.5696
ENSG00000091482.8|SMPX	0	0	0	0	0	0	0	0	0	0	0	0	0	0	0	0
ENSG00000091483.8|FH	36.3558	33.9607	45.6743	33.5895	44.7555	43.0348	45.008	42.962	75.4266	74.1588	83.1195	69.6791	72.1832	64.0816	60.2809	55.2314
ENSG00000091490.11|SEL1L3	135.227	130.201	133.177	142.996	155.569	147.463	150.381	153.452	114.644	113.087	107.662	113.463	136.572	143.941	132	160.986
ENSG00000091513.16|TF	0.023253	0.001661	0	0.032875	0.68925	0.260906	0.659821	0.027265	0.01455	0.457211	0.020077	0.062697	0.464721	0	0.037332	0
ENSG00000091527.16|CDV3	197.804	188.435	198.653	191.707	214.844	198.846	224.909	222.785	229.427	205.675	230.727	218.121	224.312	216.412	191.93	226.305
ENSG00000091536.19|MYO15A	0.511294	0.185843	0.366297	0.603144	0.332586	0.232599	0.062639	0.333923	0.043507	0.091402	0.06999	0.264545	0.042762	0.050993	0.01254	0.050992
ENSG00000091542.9|ALKBH5	74.9417	72.6297	70.8813	66.2421	82.6069	83.0154	74.3165	76.9844	69.372	57.8354	66.6829	61.4872	75.1899	84.6085	76.9131	84.0914
ENSG00000091583.11|APOH	0	0	0	0	0	0	0	0	0	0	0	0	0	0	0	0
ENSG00000091592.16|NLRP1	34.5998	34.8342	38.2185	44.3873	44.0735	43.0041	45.4959	43.7987	23.1917	29.5672	18.6269	23.2401	26.052	28.8228	27.6533	31.8063
ENSG00000091622.16|PITPNM3	1.35766	1.4924	1.2207	1.35574	1.94788	1.8692	2.40521	1.21873	2.98381	2.74088	2.18865	2.06624	3.09165	3.66502	3.33119	3.51974
ENSG00000091640.8|SPAG7	64.8109	71.5234	61.2289	59.4969	62.6659	64.348	65.172	66.9418	80.8396	73.5715	76.9784	77.9688	66.5901	69.831	83.5474	66.7739
ENSG00000091651.9|ORC6	3.98204	3.28907	2.46111	4.37515	5.08041	3.18294	4.91834	3.70806	13.5729	21.2131	12.8782	17.9891	8.97294	13.9697	7.69349	7.37082
ENSG00000091656.19|ZFHX4	3.28978	3.41799	3.73428	3.70617	3.25952	3.45406	2.97079	2.976	7.77422	5.75509	7.13884	4.98386	9.1801	8.17888	6.47763	10.1211
ENSG00000091664.9|SLC17A6	0.117877	0	0	0	0	0	0	0	0	0	0	0	0	0	0	0
ENSG00000091704.10|CPA1	0	0	0	0	0	0	0	0.129229	0	0	0	0	0	0	0	0
ENSG00000091732.17|ZC3HC1	17.1797	13.9881	18.7913	16.1192	15.8638	18.4646	18.7545	18.9805	26.039	34.945	26.5652	29.1137	27.7772	27.6842	25.4538	24.6683
ENSG00000091831.24|ESR1	0.133356	0.253966	0	0	0.080933	0.066842	0.235241	0	0	0	0.016135	0.033732	0.068341	0.073372	0.116327	0
ENSG00000091844.8|RGS17	2.03793	2.35887	1.94445	2.72797	1.51238	2.48365	2.5131	2.49696	1.18512	1.43318	1.43288	1.28744	1.31506	1.33907	1.53742	1.59403
ENSG00000091879.14|ANGPT2	32.8688	32.6074	33.5746	34.9894	42.1192	38.4907	40.7521	39.5183	15.8249	17.348	23.2221	22.1187	30.7489	31.1359	27.3085	34.2429
ENSG00000091947.10|TMEM101	35.3222	36.3929	42.0296	36.4335	39.5088	39.7752	38.0077	37.0581	27.1859	33.5006	28.0759	27.8108	30.8526	30.9331	30.4768	26.8786
ENSG00000091972.18|CD200	5.84702	5.50888	4.74075	6.63416	5.50305	6.61061	8.00281	7.27538	0.121905	0.441034	0.524419	0.357546	0.149882	0.354217	0.373369	0
ENSG00000091986.16|CCDC80	1.37652	2.24063	2.12702	2.00933	0.985074	2.1522	1.50953	2.1845	1.55655	1.05539	1.34933	1.44687	1.91498	1.97063	1.22391	2.19139
ENSG00000092009.10|CMA1	0	0	0	0	0	0	0	0	0	0	0	0	0	0	0	0
ENSG00000092010.15|PSME1	256.328	272.923	279.206	253.561	316.842	267.088	246.379	283.143	281.952	274.03	277.609	287.897	249.321	277.032	258.755	225.857
ENSG00000092020.11|PPP2R3C	41.2554	39.4445	51.7765	55.2878	47.841	42.4117	45.5319	41.7783	46.5885	48.9846	45.9426	43.1828	46.7566	38.597	44.5967	43.77
ENSG00000092036.19|HAUS4	18.4178	17.6103	21.1016	24.2936	25.9059	22.5898	20.8726	19.7743	26.2151	26.6976	21.8562	28.1801	19.4176	22.8511	15.441	25.5922
ENSG00000092051.17|JPH4	0	0.218979	0	0	0	0.057949	0	0.084498	0.035469	0	0	0.074717	0.104369	0.073742	0	0.061472
ENSG00000092054.13|MYH7	0.064192	0	0.081319	0	0.134554	0	0	0.052535	0	0	0	0	0	0	0	0
ENSG00000092067.6|CEBPE	0	0	0	0	0	0	0	0	0	0	0	0	0	0	0	0
ENSG00000092068.20|SLC7A8	1.12021	0.799962	1.46059	2.25947	1.39985	1.12012	3.69399	1.66156	4.32206	2.42111	3.44262	2.21162	2.41507	3.08185	2.61938	2.29997
ENSG00000092094.11|OSGEP	29.461	28.5403	30.4644	33.9499	45.0647	36.4175	38.2431	33.4519	21.0607	31.834	19.7331	23.464	19.3552	18.223	21.0856	22.9986
ENSG00000092096.18|SLC22A17	2.00551	0.935443	2.01079	0.796223	0.673588	0.786717	0.971755	0.694921	0.500288	0.7466	0.740632	1.00073	0.26234	1.10459	1.21681	0.906045
ENSG00000092098.17|RNF31	14.9252	29.8953	33.0872	22.9146	37.9337	22.8851	60.4684	22.4583	12.0612	21.2786	33.7588	23.848	13.9801	17.2322	28.7575	12.4109
ENSG00000092108.22|SCFD1	32.8333	29.8728	33.9946	38.8354	43.0917	37.4532	43.4373	41.8284	30.9109	43.3854	31.9324	32.6247	34.867	29.9859	37.0726	35.4723
ENSG00000092140.16|G2E3	6.15267	6.17929	8.27495	8.37494	6.92244	7.9655	9.28256	8.45126	6.22993	7.42117	6.94765	5.67965	5.70688	6.30079	7.15571	6.15333
ENSG00000092148.13|HECTD1	53.0374	43.1091	47.3778	56.4827	50.0287	57.5498	51.1249	52.3519	49.1274	47.9606	44.9675	42.6673	52.3322	49.0588	50.7791	68.5053
ENSG00000092199.18|HNRNPC	361.408	325.247	356.291	369.898	401.52	351.417	384.494	366.482	426.496	418.015	428.254	423.733	412.397	398.9	416.886	393.346
ENSG00000092200.13|RPGRIP1	0	0.052032	0	0	1.03244	0	0	0.031187	0	0	0	0	0	0	0	0
ENSG00000092201.10|SUPT16H	40.0152	33.7071	39.682	45.0351	49.4191	40.7416	45.524	47.5635	60.7077	57.5812	58.3901	58.0063	56.5167	59.6563	50.9618	55.0558
ENSG00000092203.15|TOX4	39.4228	41.3451	45.9036	41.6898	45.3638	38.3564	44.0228	39.8633	42.8028	39.5874	37.8209	38.2222	40.5619	39.9264	39.7536	42.3665
ENSG00000092208.19|GEMIN2	7.07264	8.53042	7.41026	10.6413	12.3026	11.3864	11.078	9.45646	13.5165	16.9861	11.9456	11.9887	11.2515	13.2768	10.2919	13.7371
ENSG00000092295.12|TGM1	2.44139	1.70066	1.6004	3.92213	1.04229	1.95636	2.93607	2.7293	0.549633	1.20279	0.311357	0.392536	0.346129	0.434793	0.419268	1.32299
ENSG00000092330.18|TINF2	46.6315	43.615	44.2668	39.4809	43.8647	42.1487	54.5774	46.6861	40.2752	38.8558	43.4382	44.0932	43.687	38.4088	39.6622	37.5726
ENSG00000092345.14|DAZL	0	0	0	0	0	0	0	0	0	0	0	0	0	0	0	0
ENSG00000092377.15|TBL1Y	0.007774	0	0	0.003739	0	0	0	0	0	0	0	0	0	0	0	0
ENSG00000092421.17|SEMA6A	1.41078	0.718674	0.700539	0.905358	1.44139	0.630785	0.852433	0.997541	0.088202	0.334509	0.11811	0.089536	0.135419	0.080409	0.205464	0.085987
ENSG00000092439.16|TRPM7	24.8702	22.9556	18.7895	33.6522	26.0773	28.1052	28.7006	25.4134	18.2313	21.4848	15.7154	15.3178	17.6177	17.1078	17.8226	27.6415
ENSG00000092445.12|TYRO3	8.81978	8.35083	9.17842	9.25633	8.94075	8.67134	10.0266	8.35543	8.93142	9.25783	12.2847	8.99909	10.2704	11.4783	9.81637	11.9131
ENSG00000092470.12|WDR76	2.83629	1.86187	2.88047	1.94629	2.29063	1.35662	1.98806	2.83289	10.6284	9.8035	9.26141	9.54818	6.24703	6.48631	4.77081	5.91517
ENSG00000092529.25|CAPN3	3.46956	1.87003	3.56152	5.59113	4.12329	3.35547	4.51867	3.47707	1.09902	1.94187	0.485183	1.03733	0.723401	1.45278	1.70014	1.97456
ENSG00000092531.10|SNAP23	113.587	109.247	108.271	133.734	109.836	131.088	128.453	128.719	216.542	228.95	210.904	202.304	254.164	246.562	268.164	274.75
ENSG00000092607.15|TBX15	0.061152	0.035436	0	0	0.071841	0	0	0	0	0	0	0	0	0.041234	0.16325	0.141416
ENSG00000092621.13|PHGDH	54.1284	48.4408	44.1887	51.3871	39.6088	33.5587	50.001	42.1162	29.554	25.003	22.609	19.8463	19.0121	16.3353	12.4556	10.359
ENSG00000092758.18|COL9A3	0	0.672805	1.00292	0.718885	0.411124	1.46397	1.72028	1.5652	0	0	0.048741	0	0	0	0	0
ENSG00000092820.18|EZR	91.1094	87.5469	83.6426	84.025	95.2038	91.1853	103.639	97.6959	88.703	81.6797	93.6221	91.3315	87.4065	92.3287	81.1597	79.0271
ENSG00000092841.19|MYL6	2695.89	2618.22	2691.56	2777.88	2556.73	2859.95	2745.75	2516.53	3709.49	3594.34	3639.25	4071.62	3538.34	3311.44	4198.12	3236.28
ENSG00000092847.13|AGO1	14.2197	13.7668	14.5475	10.8894	18.9419	18.1205	18.0808	17.7068	15.5349	9.98876	11.8142	9.62153	11.8473	11.8773	10.7522	15.7783
ENSG00000092850.12|TEKT2	0.543317	0.370037	0	0	0	0.888953	0	0.409814	0.08818	0.083258	0	0	0	0	0	0
ENSG00000092853.14|CLSPN	0.664099	0.590696	0.413641	0.480025	0	0.255579	0.535721	0.303107	7.72505	8.00246	8.1788	9.20673	4.60531	5.90825	2.90993	2.71359
ENSG00000092871.17|RFFL	9.29921	9.89424	12.6663	10.5036	10.9725	12.3476	10.665	9.70659	6.81637	9.05136	5.83654	6.16517	7.52337	8.11269	5.53806	7.27231
ENSG00000092929.12|UNC13D	14.8981	13.6576	14.7397	12.8115	16.1553	16.7607	21.5678	20.4236	6.29515	9.39842	7.14797	7.62884	7.27724	7.76509	7.93388	7.58653
ENSG00000092931.11|MFSD11	24.552	22.3938	29.3296	33.734	28.975	28.6704	34.4258	29.8033	26.508	33.5593	24.8975	26.8801	25.2511	26.6916	32.51	28.0095
ENSG00000092964.18|DPYSL2	103.46	99.2839	107.737	110.584	134.921	118.635	111.595	120.808	100.426	86.9818	79.0021	86.9984	134.866	135.133	96.1724	137.91
ENSG00000092969.12|TGFB2	1.89976	2.054	1.70737	1.20509	1.75286	1.56372	2.57885	2.16539	1.62459	1.43926	1.82395	1.23032	3.41283	2.88749	2.72576	2.93454
ENSG00000092978.11|GPATCH2	7.27375	6.56924	5.67219	7.76867	7.6056	7.2335	8.12719	8.73205	6.16122	9.1525	5.55743	5.24368	5.79212	5.87515	7.72753	6.86957
ENSG00000093000.19|NUP50	34.7908	32.9538	37.6221	40.0959	34.7488	34.0586	39.0762	37.0371	29.9555	30.014	28.4485	28.0675	31.1938	30.8533	27.2693	30.0004
ENSG00000093009.11|CDC45	1.37617	1.7508	0.418213	0.648258	0.612699	0.882034	1.61872	1.01109	12.7595	16.7088	9.16717	12.3839	6.5726	7.98633	4.09316	3.6632
ENSG00000093010.15|COMT	163.402	150.512	150.542	135.348	138.35	149.678	155.278	139.595	123.104	136.891	116.761	133.716	127.559	147.115	131.345	134.845
ENSG00000093072.18|ADA2	11.2561	10.3772	10.1936	13.8588	15.8973	12.0434	13.0876	12.6573	4.70231	3.58901	4.0965	4.12023	4.77036	5.61986	4.88589	4.85
ENSG00000093100.13|XXbac-B461K10.4	12.1212	11.1101	10.5276	11.973	17.9932	15.4579	15.2702	6.6677	3.25725	7.69511	6.04258	7.88552	9.53575	3.94766	9.79045	10.087
ENSG00000093134.15|VNN3	0	0	0	0.167156	0.162673	0	0	0	0	0	0	0	0	0	0	0.259885
[truncated: 58,651 more rows]
