# Supplementary material
Source: MDPI journal article supplement (https://www.mdpi.com/2306-5729/8/5/92)
Supplement: s1 [file s1 › Table_S2.xlsx]

## Sheet: T2D-HAEC 0.1Gy vs 0Gy
Table S2. Differentially expressed genes identified in each comparison.
EntrezID	logFC	baseMean	lfcSE	stat	P.Value	adj.P.Val	Symbols	Name
2537	-0.68421	45448	0.053711	-12.739	3.6062e-37	4.8165e-33	IFI6	interferon alpha inducible protein 6
4193	0.50485	39927	0.046881	10.769	4.8323e-27	3.227e-23	MDM2	MDM2 proto-oncogene
3303	-0.59969	14705	0.058011	-10.338	4.7616e-25	2.1199e-21	HSPA1A	heat shock protein family A (Hsp70) member 1A
6401	-0.6115	8401.3	0.060154	-10.165	2.8281e-24	9.4429e-21	SELE	selectin E
3106	-0.4182	65032	0.043753	-9.5581	1.1988e-21	3.2023e-18	HLA-B	"major histocompatibility complex, class I, B"
3304	-0.60444	13635	0.066587	-9.0775	1.1113e-19	2.4737e-16	HSPA1B	heat shock protein family A (Hsp70) member 1B
100534599	-28.299	857.41	3.4119	-8.2941	1.0943e-16	2.0879e-13	ISY1-RAB43	ISY1-RAB43 readthrough
4061	-0.49805	7779.7	0.066905	-7.4441	9.761e-14	1.6296e-10	LY6E	lymphocyte antigen 6 family member E
633	-0.57672	5007	0.082292	-7.0082	2.4145e-12	3.5831e-09	BGN	biglycan
9636	-0.59885	8946.7	0.086705	-6.9067	4.9603e-12	6.6249e-09	ISG15	ISG15 ubiquitin like modifier
3434	-0.4873	5176	0.075791	-6.4295	1.28e-10	1.5542e-07	IFIT1	interferon induced protein with tetratricopeptide repeats 1
10631	-0.40166	7178	0.064825	-6.1961	5.7893e-10	6.4435e-07	POSTN	periostin
3310	-0.59926	2378.8	0.10105	-5.9304	3.0217e-09	3.1044e-06	HSPA6	heat shock protein family A (Hsp70) member 6
4599	-0.31877	22666	0.056157	-5.6764	1.3757e-08	1.3124e-05	MX1	MX dynamin like GTPase 1
5865	0.48946	4820.1	0.089189	5.4879	4.0683e-08	3.6224e-05	RAB3B	"RAB3B, member RAS oncogene family"
1937	0.32134	29610	0.06068	5.2957	1.1858e-07	9.8987e-05	EEF1G	eukaryotic translation elongation factor 1 gamma
567	-0.27505	79385	0.052335	-5.2557	1.4749e-07	0.00011587	B2M	beta-2-microglobulin
3320	-0.24735	30802	0.048051	-5.1478	2.6357e-07	0.00017992	HSP90AA1	heat shock protein 90 alpha family class A member 1
387522	-24.616	373.18	4.7852	-5.1442	2.6871e-07	0.00017992	TMEM189-UBE2V1	TMEM189-UBE2V1 readthrough
3315	-0.28943	21937	0.056269	-5.1437	2.6942e-07	0.00017992	HSPB1	heat shock protein family B (small) member 1
51293	-0.69748	1914.4	0.14134	-4.9348	8.0213e-07	0.00051015	CD320	CD320 molecule
51296	-0.69728	1688.3	0.14185	-4.9156	8.8529e-07	0.00053745	SLC15A3	solute carrier family 15 member 3
1513	-0.51289	2745.1	0.10559	-4.8572	1.1903e-06	0.00069122	CTSK	cathepsin K
388	-0.2906	17726	0.061252	-4.7443	2.0918e-06	0.0011351	RHOB	ras homolog family member B
871	-0.26556	13242	0.05601	-4.7412	2.1247e-06	0.0011351	SERPINH1	serpin family H member 1
51351	0.39853	13762	0.084501	4.7163	2.4015e-06	0.0012308	ZNF117	zinc finger protein 117
968	-0.54107	1867.9	0.1149	-4.7091	2.4882e-06	0.0012308	CD68	CD68 molecule
23352	0.23627	26323	0.050299	4.6972	2.6376e-06	0.0012552	UBR4	ubiquitin protein ligase E3 component n-recognin 4
1019	-0.41891	4422.3	0.089332	-4.6894	2.7399e-06	0.0012552	CDK4	cyclin dependent kinase 4
91543	-0.52348	2099.2	0.11177	-4.6836	2.8193e-06	0.0012552	RSAD2	radical S-adenosyl methionine domain containing 2
2014	-0.53643	2933.9	0.11503	-4.6634	3.1098e-06	0.0013398	EMP3	epithelial membrane protein 3
5025	-0.30054	6737.3	0.064687	-4.6461	3.3828e-06	0.0014119	P2RX4	purinergic receptor P2X 4
9246	-0.35671	4678.5	0.077223	-4.6193	3.851e-06	0.0015586	UBE2L6	ubiquitin conjugating enzyme E2 L6
50484	0.28826	8337.9	0.062499	4.6123	3.9829e-06	0.0015646	RRM2B	ribonucleotide reductase regulatory TP53 inducible subunit M2B
51056	-0.37091	5750	0.080975	-4.5806	4.6361e-06	0.0017028	LAP3	leucine aminopeptidase 3
7122	-0.33435	9799.1	0.072994	-4.5805	4.6387e-06	0.0017028	CLDN5	claudin 5
5270	-0.32382	7555.3	0.070749	-4.577	4.7172e-06	0.0017028	SERPINE2	serpin family E member 2
1606	0.39803	3437.2	0.087609	4.5433	5.5384e-06	0.0019466	DGKA	diacylglycerol kinase alpha
23334	0.36755	5309.1	0.081319	4.5198	6.1894e-06	0.0021196	SZT2	SZT2 subunit of KICSTOR complex
64393	0.30449	7986.9	0.068442	4.449	8.6281e-06	0.0028809	ZMAT3	zinc finger matrin-type 3
117608	0.98779	539.74	0.22266	4.4362	9.1544e-06	0.0029821	ZNF354B	zinc finger protein 354B
2202	-0.19426	56177	0.044257	-4.3893	1.1369e-05	0.0036143	EFEMP1	EGF containing fibulin extracellular matrix protein 1
6836	-0.26719	12813	0.060942	-4.3843	1.1636e-05	0.0036143	SURF4	surfeit 4
65123	0.31809	5161	0.072758	4.3719	1.2317e-05	0.0037389	INTS3	integrator complex subunit 3
23015	0.38914	5046.5	0.090009	4.3234	1.5367e-05	0.004561	GOLGA8A	golgin A8 family member A
5362	0.2968	20027	0.068792	4.3145	1.5999e-05	0.0046452	PLXNA2	plexin A2
81567	-0.16934	53823	0.039309	-4.3079	1.6478e-05	0.0046827	TXNDC5	thioredoxin domain containing 5
51760	-3.5125	40.573	0.81648	-4.302	1.6926e-05	0.0047096	SYT17	synaptotagmin 17
89849	0.45962	3038.9	0.10708	4.2922	1.7695e-05	0.0048156	ATG16L2	autophagy related 16 like 2
1191	-0.29655	14582	0.069158	-4.288	1.8028e-05	0.0048156	CLU	clusterin
114902	-0.4068	2855.2	0.095081	-4.2785	1.882e-05	0.0049028	C1QTNF5	C1q and TNF related 5
684	-0.2472	16963	0.05782	-4.2753	1.9088e-05	0.0049028	BST2	bone marrow stromal cell antigen 2
4050	-0.91754	751.2	0.21586	-4.2506	2.1323e-05	0.005299	LTB	lymphotoxin beta
667	0.22493	26080	0.052936	4.2491	2.1466e-05	0.005299	DST	dystonin
977	-0.24195	19136	0.056992	-4.2454	2.1821e-05	0.005299	CD151	CD151 molecule (Raph blood group)
6687	0.25238	10559	0.059516	4.2406	2.2295e-05	0.0053174	SPG7	"SPG7 matrix AAA peptidase subunit, paraplegin"
8515	0.28037	8265.8	0.066607	4.2094	2.5608e-05	0.0060005	ITGA10	integrin subunit alpha 10
483	-0.2451	13101	0.05829	-4.2047	2.6138e-05	0.006019	ATP1B3	ATPase Na+/K+ transporting subunit beta 3
79581	-0.53281	2202.7	0.12798	-4.1631	3.1402e-05	0.0070033	SLC52A2	solute carrier family 52 member 2
5806	-0.16143	69857	0.038781	-4.1626	3.1461e-05	0.0070033	PTX3	pentraxin 3
64135	-0.33715	4483.9	0.081606	-4.1315	3.6043e-05	0.0078917	IFIH1	interferon induced with helicase C domain 1
22915	-0.20526	28624	0.049886	-4.1145	3.8801e-05	0.0083586	MMRN1	multimerin 1
4123	0.32428	6605.3	0.079026	4.1035	4.0693e-05	0.0086268	MAN2C1	mannosidase alpha class 2C member 1
26115	0.51828	1600.9	0.12745	4.0665	4.7716e-05	0.0099576	TANC2	"tetratricopeptide repeat, ankyrin repeat and coiled-coil containing 2"
259282	0.32115	5026.1	0.079516	4.0388	5.3715e-05	0.011037	BOD1L1	biorientation of chromosomes in cell division 1 like 1
10410	-0.2857	17361	0.070889	-4.0302	5.5734e-05	0.011279	IFITM3	interferon induced transmembrane protein 3
27286	0.23112	9465.9	0.057403	4.0262	5.669e-05	0.011301	SRPX2	sushi repeat containing protein X-linked 2
10724	0.26449	9541.5	0.065806	4.0193	5.8371e-05	0.011465	OGA	O-GlcNAcase
6520	-0.20611	18261	0.05145	-4.0061	6.1731e-05	0.011819	SLC3A2	solute carrier family 3 member 2
7586	0.27209	7153.5	0.067934	4.0053	6.1944e-05	0.011819	ZKSCAN1	zinc finger with KRAB and SCAN domains 1
81669	0.32992	9020.3	0.08248	4	6.335e-05	0.011917	CCNL2	cyclin L2
10075	0.22586	14194	0.05654	3.9947	6.479e-05	0.012018	HUWE1	"HECT, UBA and WWE domain containing E3 ubiquitin protein ligase 1"
57142	-0.15542	53281	0.039079	-3.977	6.9792e-05	0.012769	RTN4	reticulon 4
396	-0.2689	17850	0.067685	-3.9728	7.1033e-05	0.012821	ARHGDIA	Rho GDP dissociation inhibitor alpha
286749	-8.0505	15.803	2.0351	-3.9559	7.6249e-05	0.013578	STON1-GTF2A1L	STON1-GTF2A1L readthrough
967	-0.23299	47580	0.059014	-3.9481	7.8786e-05	0.013846	CD63	CD63 molecule
79711	-0.61132	1098	0.15521	-3.9387	8.1914e-05	0.014117	IPO4	importin 4
3337	-0.33659	5914.6	0.08549	-3.9372	8.2446e-05	0.014117	DNAJB1	DnaJ heat shock protein family (Hsp40) member B1
440270	0.39096	3514.7	0.099768	3.9188	8.9008e-05	0.015048	GOLGA8B	golgin A8 family member B
26999	0.36997	3187.2	0.095552	3.8719	0.00010798	0.018027	CYFIP2	cytoplasmic FMR1 interacting protein 2
51433	0.27058	5455.4	0.069945	3.8684	0.00010955	0.018063	ANAPC5	anaphase promoting complex subunit 5
445815	0.21315	27999	0.055163	3.864	0.00011157	0.018172	PALM2AKAP2	PALM2 and AKAP2 fusion
2907	-0.289	10514	0.075238	-3.8411	0.00012246	0.019706	GRINA	glutamate ionotropic receptor NMDA type subunit associated protein 1
339541	6.953	19.778	1.8249	3.8101	0.00013891	0.022087	ARMH1	armadillo like helical domain containing 1
85441	-0.2616	13894	0.068994	-3.7917	0.00014964	0.023058	HELZ2	helicase with zinc finger 2
338657	0.54472	1176.4	0.14367	3.7915	0.00014973	0.023058	CCDC84	coiled-coil domain containing 84
85301	0.28584	5849.6	0.075448	3.7886	0.00015152	0.023058	COL27A1	collagen type XXVII alpha 1 chain
6347	-0.28419	11192	0.075026	-3.7879	0.00015193	0.023058	CCL2	C-C motif chemokine ligand 2
79144	-0.32569	3829.8	0.08619	-3.7787	0.00015764	0.023656	PPDPF	pancreatic progenitor cell differentiation and proliferation factor
3329	-0.22739	9467.8	0.060255	-3.7739	0.00016075	0.023792	HSPD1	heat shock protein family D (Hsp60) member 1
7314	-0.18235	18034	0.048347	-3.7718	0.0001621	0.023792	UBB	ubiquitin B
6480	-0.20717	10723	0.05541	-3.7388	0.0001849	0.026843	ST6GAL1	"ST6 beta-galactoside alpha-2,6-sialyltransferase 1"
2900	-7.2394	17.808	1.938	-3.7354	0.00018739	0.026912	GRIK4	glutamate ionotropic receptor kainate type subunit 4
2512	-0.19163	136970	0.051354	-3.7316	0.00019025	0.026988	FTL	ferritin light chain
26160	0.42797	2177.4	0.11476	3.7294	0.00019196	0.026988	IFT172	intraflagellar transport 172
9962	0.40871	2102.6	0.11003	3.7145	0.00020361	0.028328	SLC23A2	solute carrier family 23 member 2
57761	-0.28349	5763.3	0.076571	-3.7023	0.00021364	0.029254	TRIB3	tribbles pseudokinase 3
3665	-0.44202	2942	0.11943	-3.7011	0.00021465	0.029254	IRF7	interferon regulatory factor 7
79101	0.29108	4707.2	0.078734	3.697	0.00021819	0.029259	TAF1D	"TATA-box binding protein associated factor, RNA polymerase I subunit D"
79073	-0.26783	6371.9	0.072467	-3.6959	0.00021907	0.029259	TMEM109	transmembrane protein 109
6469	7.0854	16.121	1.9205	3.6894	0.00022475	0.02972	SHH	sonic hedgehog signaling molecule
84065	-0.47502	1879.9	0.12898	-3.6831	0.00023044	0.030175	TMEM222	transmembrane protein 222
51150	-0.22848	14000	0.062322	-3.6661	0.0002463	0.031937	SDF4	stromal cell derived factor 4
7293	-1.2361	215.1	0.33743	-3.6631	0.00024917	0.031999	TNFRSF4	TNF receptor superfamily member 4
3430	-0.40798	2146.2	0.11163	-3.6546	0.00025758	0.032764	IFI35	interferon induced protein 35
2923	-0.19519	17775	0.053703	-3.6347	0.00027829	0.035064	PDIA3	protein disulfide isomerase family A member 3
5447	-0.41806	2335.5	0.11617	-3.5986	0.00031987	0.039613	POR	cytochrome p450 oxidoreductase
57763	0.65217	795.1	0.18124	3.5983	0.00032032	0.039613	ANKRA2	ankyrin repeat family A member 2
80005	0.37998	2397.4	0.10578	3.5923	0.00032771	0.040153	DOCK5	dedicator of cytokinesis 5
54922	-0.35888	3248.6	0.099967	-3.59	0.0003307	0.040153	RASIP1	Ras interacting protein 1
3133	-0.17555	41451	0.049008	-3.5821	0.00034081	0.041008	HLA-E	"major histocompatibility complex, class I, E"
5359	-0.266	5030.4	0.075042	-3.5448	0.00039298	0.046476	PLSCR1	phospholipid scramblase 1
4015	-0.18373	15396	0.051834	-3.5446	0.00039322	0.046476	LOX	lysyl oxidase
80097	-0.45281	1790.7	0.12796	-3.5387	0.00040204	0.04707	MZT2B	mitotic spindle organizing protein 2B
84901	0.32877	3694.4	0.092962	3.5366	0.00040529	0.04707	NFATC2IP	nuclear factor of activated T cells 2 interacting protein
92856	-0.4992	1256.6	0.14178	-3.5211	0.00042983	0.049489	IMP4	IMP U3 small nucleolar ribonucleoprotein 4
390	-0.23776	6089.1	0.067625	-3.5158	0.00043836	0.050041	RND3	Rho family GTPase 3
6891	-0.28783	4853.3	0.081989	-3.5106	0.00044706	0.050601	TAP2	"transporter 2, ATP binding cassette subfamily B member"
9123	-0.27248	11164	0.077729	-3.5055	0.00045579	0.051155	SLC16A3	solute carrier family 16 member 3
5591	0.24008	8774.5	0.068579	3.5008	0.00046387	0.051629	PRKDC	"protein kinase, DNA-activated, catalytic subunit"
9975	0.47697	1419.8	0.13647	3.4951	0.0004738	0.052298	NR1D2	nuclear receptor subfamily 1 group D member 2
10376	-0.16635	17059	0.047791	-3.4809	0.00049981	0.054717	TUBA1B	tubulin alpha 1b
23195	0.30811	3318.1	0.088614	3.477	0.00050712	0.054871	MDN1	midasin AAA ATPase 1
8878	-0.15768	71762	0.045367	-3.4757	0.00050944	0.054871	SQSTM1	sequestosome 1
90196	-0.54462	987.96	0.15723	-3.4638	0.00053253	0.056467	SYS1	SYS1 golgi trafficking protein
10960	-0.24482	8051.9	0.07068	-3.4637	0.00053271	0.056467	LMAN2	"lectin, mannose binding 2"
57634	0.25711	5253.3	0.074282	3.4612	0.00053775	0.056552	EP400	E1A binding protein p400
65975	6.5366	15.734	1.8916	3.4556	0.00054898	0.057144	STK33	serine/threonine kinase 33
23600	1.1317	220.74	0.32764	3.4542	0.00055193	0.057144	AMACR	alpha-methylacyl-CoA racemase
27031	0.44745	1837.5	0.12974	3.4489	0.00056282	0.057628	NPHP3	nephrocystin 3
378706	-0.79952	8402.1	0.23189	-3.4478	0.00056524	0.057628	RN7SL2	RNA component of signal recognition particle 7SL2
26152	0.43744	2506.2	0.12713	3.4409	0.00057973	0.058659	ZNF337	zinc finger protein 337
754	-0.15073	24960	0.043849	-3.4376	0.00058697	0.058944	PTTG1IP	PTTG1 interacting protein
652	-0.50039	1718.2	0.14602	-3.4268	0.00061075	0.060645	BMP4	bone morphogenetic protein 4
65981	0.3513	2441.9	0.10254	3.4258	0.00061298	0.060645	CAPRIN2	caprin family member 2
23213	-7.2914	10.022	2.1312	-3.4212	0.0006234	0.061222	SULF1	sulfatase 1
10890	-0.20803	8336.4	0.060963	-3.4125	0.00064381	0.062455	RAB10	"RAB10, member RAS oncogene family"
1973	-0.17755	16850	0.052054	-3.4108	0.00064762	0.062455	EIF4A1	eukaryotic translation initiation factor 4A1
7316	-0.14514	64971	0.042587	-3.4081	0.00065407	0.062455	UBC	ubiquitin C
10521	0.20032	26691	0.058821	3.4056	0.00066012	0.062455	DDX17	DEAD-box helicase 17
2896	-0.17434	45345	0.051195	-3.4055	0.00066039	0.062455	GRN	granulin precursor
1508	-0.1424	90609	0.041844	-3.4031	0.00066623	0.062455	CTSB	cathepsin B
4739	-0.29127	4157.6	0.085616	-3.4021	0.0006687	0.062455	NEDD9	"neural precursor cell expressed, developmentally down-regulated 9"
26118	0.25165	23712	0.074177	3.3926	0.00069236	0.063971	WSB1	WD repeat and SOCS box containing 1
57461	0.50152	1440	0.14787	3.3917	0.0006945	0.063971	ISY1	ISY1 splicing factor homolog
1305	0.21439	7073.3	0.063281	3.3879	0.00070437	0.064202	COL13A1	collagen type XIII alpha 1 chain
11113	0.79427	428.99	0.23451	3.387	0.00070662	0.064202	CIT	citron rho-interacting serine/threonine kinase
388228	-6.76	18.683	1.9974	-3.3843	0.00071354	0.064392	SBK1	SH3 domain binding kinase 1
51280	-0.23386	5986.4	0.069203	-3.3792	0.00072684	0.065152	GOLM1	golgi membrane protein 1
26140	0.32927	3461.8	0.097658	3.3716	0.00074731	0.06654	TTLL3	tubulin tyrosine ligase like 3
7127	-0.26752	4698.8	0.0795	-3.365	0.0007655	0.067709	TNFAIP2	TNF alpha induced protein 2
9528	-0.19314	9040.1	0.057513	-3.3582	0.00078456	0.068651	TMEM59	transmembrane protein 59
57654	0.48037	1522.5	0.14307	3.3575	0.00078643	0.068651	UVSSA	UV stimulated scaffold protein A
5034	-0.13978	42491	0.041779	-3.3456	0.00082106	0.071208	P4HB	prolyl 4-hydroxylase subunit beta
51115	0.50306	1165	0.15054	3.3418	0.00083242	0.071417	RMDN1	regulator of microtubule dynamics 1
3927	-0.20444	16825	0.061188	-3.3412	0.00083416	0.071417	LASP1	LIM and SH3 protein 1
3383	-0.18546	24297	0.05567	-3.3313	0.00086427	0.073523	ICAM1	intercellular adhesion molecule 1
7132	-0.22599	6875.1	0.06797	-3.3249	0.00088452	0.07477	TNFRSF1A	TNF receptor superfamily member 1A
3710	0.2274	11409	0.068535	3.318	0.00090652	0.076148	ITPR3	"inositol 1,4,5-trisphosphate receptor type 3"
374882	-0.41673	1450	0.12595	-3.3087	0.00093726	0.078237	TMEM205	transmembrane protein 205
3384	-0.2227	10785	0.067376	-3.3054	0.00094855	0.078689	ICAM2	intercellular adhesion molecule 2
3429	-0.19684	45126	0.059614	-3.3019	0.00096049	0.079187	IFI27	interferon alpha inducible protein 27
2802	0.21496	10887	0.065183	3.2978	0.00097455	0.079854	GOLGA3	golgin A3
442524	6.0826	16.06	1.8552	3.2787	0.0010427	0.084918	DPY19L2P3	DPY19L2 pseudogene 3
7412	-0.63882	730.44	0.19516	-3.2733	0.0010632	0.08606	VCAM1	vascular cell adhesion molecule 1
2259	6.3629	12.036	1.9492	3.2643	0.0010972	0.08828	FGF14	fibroblast growth factor 14
5998	-0.21334	7300.2	0.065449	-3.2597	0.0011155	0.089212	RGS3	regulator of G protein signaling 3
124935	-0.33301	2435.8	0.10232	-3.2545	0.0011361	0.090318	SLC43A2	solute carrier family 43 member 2
8450	0.27237	5781.8	0.083935	3.245	0.0011746	0.092826	CUL4B	cullin 4B
6035	-0.20673	10504	0.06391	-3.2347	0.0012175	0.095653	RNASE1	"ribonuclease A family member 1, pancreatic"
81888	-0.47765	2663.1	0.14826	-3.2217	0.0012743	0.099529	HYI	hydroxypyruvate isomerase (putative)
55107	-6.745	13.697	2.0953	-3.2191	0.0012858	0.099842	ANO1	anoctamin 1
6624	-0.2199	13922	0.068467	-3.2117	0.0013194	0.10185	FSCN1	fascin actin-bundling protein 1
80055	0.51442	1022.1	0.16025	3.2101	0.0013269	0.10185	PGAP1	post-GPI attachment to proteins inositol deacylase 1
1643	0.29805	3312.5	0.092919	3.2076	0.0013384	0.10195	DDB2	damage specific DNA binding protein 2
5522	-6.9044	11.562	2.1542	-3.2051	0.0013501	0.10195	PPP2R2C	protein phosphatase 2 regulatory subunit Bgamma
80129	-6.5129	11.683	2.0322	-3.2049	0.0013511	0.10195	CCDC170	coiled-coil domain containing 170
6029	-0.74511	7335.7	0.23319	-3.1953	0.0013967	0.1048	RN7SL1	RNA component of signal recognition particle 7SL1
11183	0.29411	3770.5	0.092215	3.1894	0.0014257	0.10638	MAP4K5	mitogen-activated protein kinase kinase kinase kinase 5
55281	-0.28266	5271.6	0.088749	-3.1849	0.001448	0.10744	TMEM140	transmembrane protein 140
84445	-0.23199	5922.8	0.073034	-3.1764	0.0014911	0.10978	LZTS2	leucine zipper tumor suppressor 2
10162	-0.94306	350.87	0.29709	-3.1744	0.0015016	0.10978	LPCAT3	lysophosphatidylcholine acyltransferase 3
115265	-0.46583	1285.6	0.14682	-3.1727	0.0015101	0.10978	DDIT4L	DNA damage inducible transcript 4 like
9235	-0.23012	8523.4	0.072539	-3.1723	0.0015124	0.10978	IL32	interleukin 32
3490	-0.15721	29938	0.049583	-3.1707	0.0015209	0.1098	IGFBP7	insulin like growth factor binding protein 7
9924	0.57864	1145	0.18314	3.1597	0.0015796	0.11342	PAN2	poly(A) specific ribonuclease subunit PAN2
284612	6.8813	9.1526	2.1808	3.1554	0.0016025	0.11446	SYPL2	synaptophysin like 2
682	-0.18064	28644	0.057411	-3.1464	0.001653	0.11743	BSG	basigin (Ok blood group)
5937	0.28362	4696	0.090309	3.1405	0.0016864	0.11917	RBMS1	RNA binding motif single stranded interacting protein 1
64771	-0.24686	3864.6	0.07869	-3.1371	0.0017064	0.11995	ILRUN	inflammation and lipid regulator with UBA-like and NBR1-like domains
83666	-0.21925	6643.9	0.069934	-3.135	0.0017183	0.12016	PARP9	poly(ADP-ribose) polymerase family member 9
11007	-0.27896	4977.3	0.089113	-3.1304	0.0017455	0.1209	CCDC85B	coiled-coil domain containing 85B
22913	-0.25871	5597.4	0.08265	-3.1302	0.0017471	0.1209	RALY	RALY heterogeneous nuclear ribonucleoprotein
5800	-6.2659	10.652	2.0041	-3.1266	0.0017687	0.12144	PTPRO	protein tyrosine phosphatase receptor type O
161198	-0.20757	13288	0.066404	-3.1258	0.0017731	0.12144	CLEC14A	C-type lectin domain containing 14A
23645	-0.20337	9193.9	0.065116	-3.1233	0.0017886	0.12154	PPP1R15A	protein phosphatase 1 regulatory subunit 15A
51330	-0.31087	2952.2	0.09956	-3.1224	0.0017938	0.12154	TNFRSF12A	TNF receptor superfamily member 12A
27148	0.34803	1934.5	0.11151	3.1211	0.0018018	0.12154	STK36	serine/threonine kinase 36
80162	0.35937	2486.9	0.11532	3.1163	0.0018311	0.12252	PGGHG	protein-glucosylgalactosylhydroxylysine glucosidase
10965	-0.72	503.9	0.23108	-3.1158	0.0018346	0.12252	ACOT2	acyl-CoA thioesterase 2
55191	0.23229	5681.1	0.074616	3.1132	0.0018507	0.12297	NADSYN1	NAD synthetase 1
11021	-0.28458	3297.7	0.091622	-3.1061	0.0018958	0.12494	RAB35	"RAB35, member RAS oncogene family"
8877	-0.31143	5169.1	0.1003	-3.105	0.0019028	0.12494	SPHK1	sphingosine kinase 1
64223	-0.43408	1222.8	0.13987	-3.1035	0.0019125	0.12494	MLST8	"MTOR associated protein, LST8 homolog"
2261	-6.1292	12.657	1.9755	-3.1027	0.0019178	0.12494	FGFR3	fibroblast growth factor receptor 3
9711	0.36875	2054.8	0.1189	3.1012	0.0019273	0.12496	RUBCN	rubicon autophagy regulator
1509	-0.20898	29985	0.067456	-3.098	0.0019486	0.12553	CTSD	cathepsin D
6498	0.27895	4993.1	0.090071	3.097	0.0019549	0.12553	SKIL	SKI like proto-oncogene
1763	0.96456	247.42	0.31229	3.0886	0.0020108	0.1285	DNA2	DNA replication helicase/nuclease 2
161502	-6.1757	11.963	2.003	-3.0833	0.0020475	0.1298	CFAP161	cilia and flagella associated protein 161
79026	0.17433	92156	0.056548	3.0828	0.0020506	0.1298	AHNAK	AHNAK nucleoprotein
55582	0.882	304.83	0.28636	3.0801	0.0020694	0.13037	KIF27	kinesin family member 27
2086	0.30286	5901	0.098392	3.0781	0.0020836	0.13065	ERV3-1	"endogenous retrovirus group 3 member 1, envelope"
4897	0.17083	16986	0.055541	3.0758	0.0020996	0.13104	NRCAM	neuronal cell adhesion molecule
23524	0.15245	26647	0.049646	3.0706	0.0021361	0.1322	SRRM2	serine/arginine repetitive matrix 2
27177	-6.5174	8.2484	2.1227	-3.0704	0.0021381	0.1322	IL36B	interleukin 36 beta
3249	-6.7372	12.647	2.2018	-3.0598	0.0022146	0.13631	HPN	hepsin
26509	0.16712	21965	0.05468	3.0564	0.0022402	0.13704	MYOF	myoferlin
25981	0.37361	2087.2	0.12228	3.0555	0.0022471	0.13704	DNAH1	dynein axonemal heavy chain 1
126328	-0.30462	3362.7	0.09986	-3.0505	0.0022849	0.13858	NDUFA11	NADH:ubiquinone oxidoreductase subunit A11
4939	-0.17346	10529	0.056886	-3.0493	0.0022937	0.13858	OAS2	2'-5'-oligoadenylate synthetase 2
51643	-0.32134	2504.3	0.10543	-3.048	0.0023034	0.13858	TMBIM4	transmembrane BAX inhibitor motif containing 4
9498	0.58892	600.76	0.19376	3.0395	0.0023699	0.14136	SLC4A8	solute carrier family 4 member 8
29123	0.15487	16585	0.050954	3.0394	0.0023708	0.14136	ANKRD11	ankyrin repeat domain 11
8110	0.63163	782.14	0.20898	3.0225	0.0025072	0.14772	DPF3	double PHD fingers 3
79811	0.28508	3371.8	0.094323	3.0224	0.0025076	0.14772	SLTM	SAFB like transcription modulator
3965	-0.32009	3654.8	0.10592	-3.0221	0.0025106	0.14772	LGALS9	galectin 9
3912	0.15763	42668	0.052196	3.02	0.0025275	0.14806	LAMB1	laminin subunit beta 1
6296	-0.44664	1366.1	0.14803	-3.0173	0.0025502	0.14874	ACSM3	acyl-CoA synthetase medium chain family member 3
23788	-0.2856	3140.5	0.09478	-3.0133	0.002584	0.14972	MTCH2	mitochondrial carrier 2
60401	0.5661	780.81	0.1879	3.0127	0.0025894	0.14972	EDA2R	ectodysplasin A2 receptor
55647	-2.1691	54.143	0.72245	-3.0025	0.002678	0.154	RAB20	"RAB20, member RAS oncogene family"
947	-0.14291	18072	0.047614	-3.0015	0.0026866	0.154	CD34	CD34 molecule
4673	0.14751	19891	0.049185	2.9991	0.0027081	0.15415	NAP1L1	nucleosome assembly protein 1 like 1
7417	-0.22277	4942.9	0.074293	-2.9986	0.0027123	0.15415	VDAC2	voltage dependent anion channel 2
11337	-0.18388	8932	0.061467	-2.9915	0.0027765	0.15713	GABARAP	GABA type A receptor-associated protein
344787	1.433	98.757	0.47938	2.9893	0.0027965	0.15759	ZNF860	zinc finger protein 860
64834	-0.28705	3795.3	0.096319	-2.9802	0.0028803	0.16104	ELOVL1	ELOVL fatty acid elongase 1
11054	-0.26669	4676.9	0.089491	-2.9801	0.0028817	0.16104	OGFR	opioid growth factor receptor
5351	-0.15497	27457	0.052117	-2.9736	0.0029437	0.16381	PLOD1	"procollagen-lysine,2-oxoglutarate 5-dioxygenase 1"
51088	0.22871	4769.3	0.07702	2.9695	0.0029828	0.1653	KLHL5	kelch like family member 5
64859	0.31206	2480.7	0.10535	2.9621	0.0030556	0.16775	NABP1	nucleic acid binding protein 1
51742	0.27383	3288.3	0.092458	2.9617	0.0030598	0.16775	ARID4B	AT-rich interaction domain 4B
26037	0.43743	1109.2	0.14778	2.9599	0.0030771	0.16775	SIPA1L1	signal induced proliferation associated 1 like 1
51121	0.67971	419.11	0.22964	2.9599	0.0030773	0.16775	RPL26L1	ribosomal protein L26 like 1
10776	0.1872	8779.4	0.063359	2.9547	0.0031302	0.16995	ARPP19	cAMP regulated phosphoprotein 19
7468	0.26879	4198.4	0.091148	2.949	0.0031885	0.17241	NSD2	nuclear receptor binding SET domain protein 2
22898	0.25759	3989.8	0.087405	2.9471	0.0032078	0.17276	DENND3	DENN domain containing 3
3482	0.16005	15410	0.054341	2.9454	0.0032257	0.17302	IGF2R	insulin like growth factor 2 receptor
348013	-0.30004	2160.3	0.10204	-2.9405	0.0032764	0.17442	TMEM255B	transmembrane protein 255B
7327	0.22059	6887.5	0.07502	2.9404	0.0032778	0.17442	UBE2G2	ubiquitin conjugating enzyme E2 G2
256309	-5.7203	15.476	1.9474	-2.9374	0.0033093	0.17535	CCDC110	coiled-coil domain containing 110
83547	-0.82347	360.77	0.28044	-2.9363	0.0033216	0.17535	RILP	Rab interacting lysosomal protein
5168	-4.6561	16.597	1.5869	-2.9341	0.0033451	0.17589	ENPP2	ectonucleotide pyrophosphatase/phosphodiesterase 2
5630	-7.2886	10.28	2.487	-2.9307	0.0033819	0.17701	PRPH	peripherin
29015	-0.34189	2932	0.1167	-2.9297	0.0033928	0.17701	SLC43A3	solute carrier family 43 member 3
6376	-0.65298	559.09	0.22298	-2.9285	0.0034063	0.17702	CX3CL1	C-X3-C motif chemokine ligand 1
284080	3.4962	24.303	1.1975	2.9195	0.003506	0.18149	PICART1	p53 inducible cancer associated RNA transcript 1
6595	0.26225	3035.2	0.089866	2.9183	0.0035199	0.18151	SMARCA2	"SWI/SNF related, matrix associated, actin dependent regulator of chromatin, subfamily a, member 2"
8408	0.33421	2922.4	0.11467	2.9145	0.0035627	0.18301	ULK1	unc-51 like autophagy activating kinase 1
4781	0.1982	7306.6	0.068053	2.9124	0.0035869	0.18355	NFIB	nuclear factor I B
11064	0.56873	715.66	0.19568	2.9064	0.0036557	0.18636	CNTRL	centriolin
113510	0.54657	656.39	0.18815	2.9049	0.0036736	0.18656	HELQ	"helicase, POLQ like"
50809	0.20006	7586.3	0.068972	2.9006	0.003724	0.1884	HP1BP3	heterochromatin protein 1 binding protein 3
683	-0.43239	1071.5	0.14917	-2.8987	0.0037468	0.18852	BST1	bone marrow stromal cell antigen 1
221035	0.21342	5014.8	0.073656	2.8975	0.0037616	0.18852	REEP3	receptor accessory protein 3
5565	0.39143	1533	0.13512	2.8969	0.0037687	0.18852	PRKAB2	protein kinase AMP-activated non-catalytic subunit beta 2
54584	-0.96985	218.58	0.33506	-2.8946	0.0037967	0.18865	GNB1L	G protein subunit beta 1 like
51312	0.23302	6293.4	0.08051	2.8943	0.0037995	0.18865	SLC25A37	solute carrier family 25 member 37
152206	6.4779	10.934	2.242	2.8894	0.0038596	0.19092	CCDC13	coiled-coil domain containing 13
27122	-0.12499	25112	0.043276	-2.8882	0.0038747	0.19096	DKK3	dickkopf WNT signaling pathway inhibitor 3
80176	-0.41435	2007.6	0.14398	-2.8779	0.0040035	0.19612	SPSB1	splA/ryanodine receptor domain and SOCS box containing 1
26278	0.2522	3324.5	0.087686	2.8762	0.0040248	0.19612	SACS	sacsin molecular chaperone
83758	6.3641	7.4715	2.2137	2.8749	0.0040414	0.19612	RBP5	retinol binding protein 5
55969	-0.29144	3164.3	0.10138	-2.8748	0.0040424	0.19612	RAB5IF	RAB5 interacting factor
89781	0.30434	2315.1	0.10589	2.874	0.0040528	0.19612	HPS4	HPS4 biogenesis of lysosomal organelles complex 3 subunit 2
3690	0.23682	5366.7	0.082463	2.8718	0.0040812	0.19678	ITGB3	integrin subunit beta 3
334	0.11176	60375	0.038945	2.8697	0.004109	0.19741	APLP2	amyloid beta precursor like protein 2
23095	0.22585	5688.7	0.078786	2.8666	0.0041495	0.19864	KIF1B	kinesin family member 1B
23446	0.25311	4369.9	0.08836	2.8645	0.004177	0.19873	SLC44A1	solute carrier family 44 member 1
220134	-6.7613	7.133	2.3607	-2.8642	0.004181	0.19873	SKA1	spindle and kinetochore associated complex subunit 1
4758	-0.25046	3565.3	0.087483	-2.8629	0.0041972	0.19879	NEU1	neuraminidase 1
378707	-0.85891	314.95	0.3003	-2.8601	0.0042346	0.19985	RN7SL3	RNA component of signal recognition particle 7SL3
286006	1.7737	72.598	0.62117	2.8555	0.0042974	0.2021	LSMEM1	leucine rich single-pass membrane protein 1
7262	-0.46988	1029.6	0.16489	-2.8496	0.004377	0.20512	PHLDA2	pleckstrin homology like domain family A member 2
23586	-0.20036	6553	0.070438	-2.8445	0.0044488	0.20738	DDX58	DExD/H-box helicase 58
84914	0.27131	3049.1	0.095399	2.8439	0.0044564	0.20738	ZNF587	zinc finger protein 587
85378	0.23692	3979.2	0.083369	2.8418	0.0044866	0.20807	TUBGCP6	tubulin gamma complex associated protein 6
226	-0.15561	48403	0.05497	-2.8309	0.0046419	0.21452	ALDOA	"aldolase, fructose-bisphosphate A"
10250	0.21566	4534.7	0.076285	2.827	0.0046984	0.21638	SRRM1	serine and arginine repetitive matrix 1
3655	0.21939	4259.9	0.07769	2.8239	0.0047447	0.21762	ITGA6	integrin subunit alpha 6
51398	-0.67125	874.8	0.23778	-2.823	0.0047578	0.21762	WDR83OS	WD repeat domain 83 opposite strand
144165	-0.34987	2118.2	0.12406	-2.8202	0.004799	0.21876	PRICKLE1	prickle planar cell polarity protein 1
6495	-1.0394	170.2	0.36896	-2.8172	0.004845	0.21952	SIX1	SIX homeobox 1
339123	-0.42776	1208.6	0.15187	-2.8167	0.0048518	0.21952	JMJD8	jumonji domain containing 8
4953	-0.2413	3632.9	0.08571	-2.8153	0.0048737	0.21952	ODC1	ornithine decarboxylase 1
27316	0.21231	5100.3	0.075429	2.8147	0.0048816	0.21952	RBMX	RNA binding motif protein X-linked
57189	0.25639	4102.3	0.09115	2.8128	0.0049113	0.22012	DENND11	DENN domain containing 11
200185	-0.40182	2116.8	0.14292	-2.8115	0.004931	0.22026	KRTCAP2	keratinocyte associated protein 2
7508	0.24989	4346.4	0.088923	2.8102	0.0049513	0.22043	XPC	"XPC complex subunit, DNA damage recognition and repair factor"
1312	-0.25426	5430.9	0.090545	-2.8081	0.0049828	0.22069	COMT	catechol-O-methyltransferase
4037	-0.47503	883.95	0.16932	-2.8056	0.005023	0.22069	LRP3	LDL receptor related protein 3
3614	-0.31625	2360.5	0.11273	-2.8053	0.0050273	0.22069	IMPDH1	inosine monophosphate dehydrogenase 1
7184	-0.12936	23618	0.046125	-2.8046	0.0050375	0.22069	HSP90B1	heat shock protein 90 beta family member 1
1266	-0.20193	6296.4	0.072003	-2.8045	0.0050398	0.22069	CNN3	calponin 3
54809	-0.2055	6094.6	0.07334	-2.802	0.0050793	0.2217	SAMD9	sterile alpha motif domain containing 9
54863	-0.27791	5709.2	0.09926	-2.7998	0.0051136	0.22247	TOR4A	torsin family 4 member A
55196	0.17194	10129	0.06144	2.7986	0.005133	0.22258	RESF1	retroelement silencing factor 1
647979	0.2028	18824	0.072599	2.7935	0.0052147	0.2254	NORAD	non-coding RNA activated by DNA damage
27244	0.37461	1590.7	0.13417	2.792	0.0052379	0.22567	SESN1	sestrin 1
91584	0.71452	382.13	0.25602	2.7909	0.0052558	0.22571	PLXNA4	plexin A4
23218	0.22343	5528.2	0.080147	2.7878	0.0053072	0.22633	NBEAL2	neurobeachin like 2
415116	-0.22355	5466.1	0.080202	-2.7873	0.0053147	0.22633	PIM3	"Pim-3 proto-oncogene, serine/threonine kinase"
116441	-0.19668	7981.7	0.070572	-2.7869	0.0053211	0.22633	TM4SF18	transmembrane 4 L six family member 18
9987	0.20512	7520.1	0.073634	2.7856	0.0053424	0.22652	HNRNPDL	heterogeneous nuclear ribonucleoprotein D like
3064	0.23048	5233.5	0.08288	2.7808	0.0054218	0.22867	HTT	huntingtin
90634	1.1883	166.06	0.42743	2.7801	0.0054346	0.22867	N4BP2L1	NEDD4 binding protein 2 like 1
5093	-0.18835	9259.5	0.067765	-2.7795	0.0054444	0.22867	PCBP1	poly(rC) binding protein 1
29121	1.0334	158.4	0.37208	2.7772	0.0054822	0.22953	CLEC2D	C-type lectin domain family 2 member D
54870	0.23776	3393.5	0.085648	2.776	0.0055035	0.2297	QRICH1	glutamine rich 1
1209	-0.1999	6888.3	0.072059	-2.7741	0.0055362	0.23035	CLPTM1	CLPTM1 regulator of GABA type A receptor forward trafficking
51246	-0.19836	11006	0.071579	-2.7712	0.0055848	0.23165	SHISA5	shisa family member 5
8743	-0.34433	1681.7	0.12444	-2.7672	0.0056549	0.23383	TNFSF10	TNF superfamily member 10
3659	-0.28677	2504.1	0.10371	-2.765	0.0056915	0.23462	IRF1	interferon regulatory factor 1
50717	0.209	5066.5	0.075644	2.763	0.0057272	0.23536	DCAF8	DDB1 and CUL4 associated factor 8
23389	0.25409	4026.8	0.092152	2.7573	0.0058286	0.23844	MED13L	mediator complex subunit 13L
1211	-0.17907	8408.3	0.06497	-2.7562	0.0058483	0.23844	CLTA	clathrin light chain A
728841	0.32192	1989.2	0.11688	2.7542	0.0058843	0.23844	NBPF8	NBPF member 8
7786	0.33841	2182.5	0.12289	2.7537	0.0058927	0.23844	MAP3K12	mitogen-activated protein kinase kinase kinase 12
57801	-0.40986	1193.1	0.14888	-2.7529	0.0059068	0.23844	HES4	hes family bHLH transcription factor 4
1440	-0.2291	6005.1	0.083261	-2.7516	0.00593	0.23844	CSF3	colony stimulating factor 3
388588	-6.3613	7.5742	2.3124	-2.751	0.0059416	0.23844	SMIM1	small integral membrane protein 1 (Vel blood group)
57584	0.16132	10973	0.058655	2.7503	0.0059533	0.23844	ARHGAP21	Rho GTPase activating protein 21
50614	-4.65	12.537	1.691	-2.7498	0.0059628	0.23844	GALNT9	polypeptide N-acetylgalactosaminyltransferase 9
4026	0.16108	9451.6	0.058637	2.7471	0.0060127	0.23972	LPP	LIM domain containing preferred translocation partner in lipoma
50488	0.16492	9580.1	0.0601	2.7441	0.0060673	0.23986	MINK1	misshapen like kinase 1
84902	-0.35965	1560	0.13107	-2.744	0.0060696	0.23986	CEP89	centrosomal protein 89
2077	-0.25437	3067.6	0.092703	-2.744	0.00607	0.23986	ERF	ETS2 repressor factor
3658	0.40018	1344.9	0.1464	2.7335	0.0062657	0.24616	IREB2	iron responsive element binding protein 2
2256	2.2187	106.4	0.81189	2.7328	0.0062805	0.24616	FGF11	fibroblast growth factor 11
79683	-0.24544	2963.2	0.089851	-2.7316	0.0063028	0.24616	ZDHHC14	zinc finger DHHC-type palmitoyltransferase 14
11182	-0.28802	2989.3	0.10545	-2.7314	0.006306	0.24616	SLC2A6	solute carrier family 2 member 6
23049	0.19294	9339.6	0.070657	2.7306	0.0063216	0.24616	SMG1	SMG1 nonsense mediated mRNA decay associated PI3K related kinase
3959	-0.27143	4661.1	0.099567	-2.7261	0.006409	0.24883	LGALS3BP	galectin 3 binding protein
9757	0.23272	4300.2	0.085536	2.7207	0.0065135	0.25112	KMT2B	lysine methyltransferase 2B
7267	0.16625	8336.1	0.061152	2.7186	0.0065555	0.25112	TTC3	tetratricopeptide repeat domain 3
5223	-0.16731	8574.4	0.061547	-2.7183	0.006561	0.25112	PGAM1	phosphoglycerate mutase 1
10180	0.28297	4275.1	0.10416	2.7168	0.0065908	0.25112	RBM6	RNA binding motif protein 6
1471	-0.19695	8432.8	0.072543	-2.7149	0.00663	0.25112	CST3	cystatin C
55568	0.22278	5529.5	0.082069	2.7146	0.0066365	0.25112	GALNT10	polypeptide N-acetylgalactosaminyltransferase 10
283358	6.8791	8.7181	2.5343	2.7144	0.0066398	0.25112	B4GALNT3	"beta-1,4-N-acetyl-galactosaminyltransferase 3"
51014	-0.20842	5227.1	0.076791	-2.7142	0.0066444	0.25112	TMED7	transmembrane p24 trafficking protein 7
11014	-0.16494	8573.6	0.060775	-2.7139	0.0066494	0.25112	KDELR2	KDEL endoplasmic reticulum protein retention receptor 2
30000	0.23155	4008.2	0.085329	2.7136	0.006656	0.25112	TNPO2	transportin 2
23215	0.15495	14144	0.057236	2.7072	0.0067856	0.25529	PRRC2C	proline rich coiled-coil 2C
27132	0.21384	4111.2	0.079053	2.705	0.0068295	0.25622	CPNE7	copine 7
57670	0.43798	942.66	0.16243	2.6964	0.0070088	0.26221	KIAA1549	KIAA1549
22877	0.20208	8763.4	0.075085	2.6914	0.0071156	0.26546	MLXIP	MLX interacting protein
10207	0.61129	503.48	0.22722	2.6903	0.0071381	0.26556	PATJ	PATJ crumbs cell polarity complex component
59	0.30033	2244.3	0.11172	2.6882	0.0071841	0.26653	ACTA2	"actin alpha 2, smooth muscle"
8985	-0.17604	9793	0.065665	-2.6808	0.0073443	0.27079	PLOD3	"procollagen-lysine,2-oxoglutarate 5-dioxygenase 3"
341405	1.2739	118.15	0.47522	2.6807	0.0073466	0.27079	ANKRD33	ankyrin repeat domain 33
23787	-0.17102	11181	0.063809	-2.6801	0.0073597	0.27079	MTCH1	mitochondrial carrier 1
1845	-0.20099	5387.2	0.075111	-2.6759	0.007452	0.27343	DUSP3	dual specificity phosphatase 3
54946	-0.31406	1863.2	0.11749	-2.673	0.0075166	0.27504	SLC41A3	solute carrier family 41 member 3
2633	-0.30554	2255	0.1144	-2.6709	0.0075645	0.27604	GBP1	guanylate binding protein 1
254827	1.262	140.89	0.47271	2.6696	0.0075935	0.27634	NAALADL2	N-acetylated alpha-linked acidic dipeptidase like 2
2312	-6.247	9.3639	2.3415	-2.6679	0.0076318	0.27698	FLG	filaggrin
3187	0.21926	15141	0.082288	2.6645	0.0077099	0.27906	HNRNPH1	heterogeneous nuclear ribonucleoprotein H1
3551	0.21542	3976	0.080881	2.6634	0.007736	0.27925	IKBKB	inhibitor of nuclear factor kappa B kinase subunit beta
23613	0.17621	7659.9	0.066265	2.6591	0.0078343	0.28139	ZMYND8	zinc finger MYND-type containing 8
6601	0.29066	5059.1	0.10931	2.659	0.0078374	0.28139	SMARCC2	"SWI/SNF related, matrix associated, actin dependent regulator of chromatin subfamily c member 2"
1778	0.12774	42571	0.048111	2.6551	0.0079296	0.28283	DYNC1H1	dynein cytoplasmic 1 heavy chain 1
10501	-0.20851	29019	0.078543	-2.6548	0.0079364	0.28283	SEMA6B	semaphorin 6B
146429	-7.0102	6.5316	2.6417	-2.6537	0.0079618	0.28283	SLC22A31	solute carrier family 22 member 31
1397	-0.18235	6156.8	0.068717	-2.6537	0.0079622	0.28283	CRIP2	cysteine rich protein 2
10270	0.3046	1965.8	0.11486	2.6519	0.008005	0.28359	AKAP8	A-kinase anchoring protein 8
9746	0.32275	2477	0.12177	2.6504	0.008039	0.28405	CLSTN3	calsyntenin 3
10961	-0.21417	4785	0.08091	-2.647	0.008121	0.28619	ERP29	endoplasmic reticulum protein 29
10181	0.20947	8387.3	0.079185	2.6453	0.0081618	0.28637	RBM5	RNA binding motif protein 5
8828	0.12395	28790	0.046863	2.645	0.0081691	0.28637	NRP2	neuropilin 2
4179	0.19793	10064	0.074923	2.6418	0.0082466	0.28833	CD46	CD46 molecule
2040	0.12538	16214	0.047485	2.6403	0.0082825	0.28883	STOM	stomatin
757	-0.35835	1482	0.13581	-2.6386	0.0083256	0.28957	TMEM50B	transmembrane protein 50B
4733	-0.31122	1960.1	0.11806	-2.6361	0.0083861	0.29092	DRG1	developmentally regulated GTP binding protein 1
56101	-0.39198	2887.9	0.14875	-2.6352	0.0084086	0.29095	PCDHGB5	"protocadherin gamma subfamily B, 5"
25844	-0.20808	4580.2	0.079175	-2.6282	0.0085849	0.29628	YIPF3	Yip1 domain family member 3
25915	-0.39311	1141.3	0.14989	-2.6226	0.0087256	0.30036	NDUFAF3	NADH:ubiquinone oxidoreductase complex assembly factor 3
1263	0.24905	2715.6	0.095151	2.6174	0.0088594	0.30418	PLK3	polo like kinase 3
3897	-1.414	74.57	0.54093	-2.614	0.0089502	0.30584	L1CAM	L1 cell adhesion molecule
5111	0.31443	1914	0.12032	2.6132	0.0089696	0.30584	PCNA	proliferating cell nuclear antigen
83590	-0.3903	1236	0.14942	-2.6121	0.0089978	0.30584	TMUB1	transmembrane and ubiquitin like domain containing 1
135	1.3635	1081.6	0.522	2.6121	0.0089993	0.30584	ADORA2A	adenosine A2a receptor
8692	-0.15519	13174	0.059472	-2.6095	0.0090681	0.30726	HYAL2	hyaluronidase 2
11151	2.6504	22.832	1.0167	2.6069	0.0091364	0.30726	CORO1A	coronin 1A
9966	-0.28613	3872.6	0.10978	-2.6064	0.0091499	0.30726	TNFSF15	TNF superfamily member 15
2901	-6.0035	8.5508	2.3034	-2.6063	0.0091522	0.30726	GRIK5	glutamate ionotropic receptor kainate type subunit 5
22826	-0.21766	3709.4	0.083518	-2.6062	0.0091562	0.30726	DNAJC8	DnaJ heat shock protein family (Hsp40) member C8
6461	-0.31646	2714.3	0.12149	-2.6049	0.009191	0.30766	SHB	SH2 domain containing adaptor protein B
57464	0.47961	747.96	0.1843	2.6023	0.009261	0.3091	STRIP2	striatin interacting protein 2
26263	0.2267	3360.5	0.087179	2.6004	0.0093108	0.3091	FBXO22	F-box protein 22
51537	-0.52436	555.25	0.2018	-2.5984	0.0093656	0.3091	MTFP1	mitochondrial fission process 1
23246	-0.37917	2031.5	0.14593	-2.5983	0.0093693	0.3091	BOP1	BOP1 ribosomal biogenesis factor
25865	-0.22717	4347.2	0.087437	-2.5981	0.0093728	0.3091	PRKD2	protein kinase D2
22897	0.28728	3000.2	0.11057	2.5981	0.009373	0.3091	CEP164	centrosomal protein 164
338440	-1.7039	73.636	0.65664	-2.5948	0.0094644	0.31114	ANO9	anoctamin 9
182	0.20585	7140	0.079352	2.5942	0.0094815	0.31114	JAG1	jagged canonical Notch ligand 1
9997	-0.75511	575.5	0.29129	-2.5923	0.0095326	0.31117	SCO2	synthesis of cytochrome C oxidase 2
7791	-0.20957	14277	0.080856	-2.5919	0.0095457	0.31117	ZYX	zyxin
56261	0.42349	1038.9	0.16342	2.5914	0.0095599	0.31117	GPCPD1	glycerophosphocholine phosphodiesterase 1
100288332	0.4749	715.26	0.1833	2.5908	0.0095755	0.31117	NPIPA5	nuclear pore complex interacting protein family member A5
645121	6.4225	5.9154	2.4799	2.5899	0.0096013	0.31125	CCNI2	cyclin I family member 2
259173	0.326	2133.6	0.12611	2.5851	0.0097362	0.31486	ALS2CL	ALS2 C-terminal like
317	0.31382	1826.9	0.12161	2.5806	0.0098622	0.31816	APAF1	apoptotic peptidase activating factor 1
8714	0.25666	2611.5	0.099584	2.5773	0.0099575	0.32046	ABCC3	ATP binding cassette subfamily C member 3
10095	-0.21918	6662.7	0.085111	-2.5752	0.010017	0.32161	ARPC1B	actin related protein 2/3 complex subunit 1B
5714	-0.20052	5430.8	0.077961	-2.5721	0.010109	0.32379	PSMD8	"proteasome 26S subunit, non-ATPase 8"
91663	-0.13813	12208	0.053794	-2.5678	0.010236	0.32706	MYADM	myeloid associated differentiation marker
728194	-6.2092	6.9778	2.4217	-2.564	0.010348	0.32909	RSPH10B2	radial spoke head 10 homolog B2
23204	-0.20697	4993.8	0.080767	-2.5626	0.010389	0.32909	ARL6IP1	ADP ribosylation factor like GTPase 6 interacting protein 1
50628	-0.373	1069	0.14562	-2.5614	0.010426	0.32909	GEMIN4	gem nuclear organelle associated protein 4
27300	0.33442	1373.7	0.13062	2.5602	0.01046	0.32909	ZNF544	zinc finger protein 544
10397	-0.19689	9728.2	0.076916	-2.5598	0.010472	0.32909	NDRG1	N-myc downstream regulated 1
2280	0.10301	36780	0.040241	2.5598	0.010474	0.32909	FKBP1A	FKBP prolyl isomerase 1A
4154	0.17689	9430.9	0.069113	2.5594	0.010486	0.32909	MBNL1	muscleblind like splicing regulator 1
6628	-0.21003	5108.9	0.082075	-2.559	0.010497	0.32909	SNRPB	small nuclear ribonucleoprotein polypeptides B and B1
55667	0.21237	4715.2	0.083093	2.5558	0.010595	0.33031	DENND4C	DENN domain containing 4C
23181	0.19366	4976.1	0.075805	2.5547	0.010627	0.33031	DIP2A	disco interacting protein 2 homolog A
121506	6.5497	8.4483	2.5638	2.5547	0.010628	0.33031	ERP27	endoplasmic reticulum protein 27
57560	0.51829	1020	0.20293	2.5541	0.010647	0.33031	IFT80	intraflagellar transport 80
6772	-0.16331	14833	0.063966	-2.553	0.01068	0.33031	STAT1	signal transducer and activator of transcription 1
6184	-0.15846	13209	0.06207	-2.5529	0.010684	0.33031	RPN1	ribophorin I
29801	-0.25731	4445.4	0.10092	-2.5497	0.010782	0.33256	ZDHHC8	zinc finger DHHC-type palmitoyltransferase 8
7439	0.86698	290.16	0.3404	2.5469	0.010868	0.33355	BEST1	bestrophin 1
1522	-0.13619	10982	0.053483	-2.5465	0.010881	0.33355	CTSZ	cathepsin Z
84961	0.26784	2493.7	0.10521	2.5457	0.010905	0.33355	FBXL20	F-box and leucine rich repeat protein 20
225689	5.9491	8.9328	2.3371	2.5455	0.010914	0.33355	MAPK15	mitogen-activated protein kinase 15
139818	-0.97084	149.57	0.38179	-2.5429	0.010995	0.33482	DOCK11	dedicator of cytokinesis 11
6522	-0.21321	7810.3	0.083863	-2.5423	0.011011	0.33482	SLC4A2	solute carrier family 4 member 2
115752	0.48738	716.05	0.19183	2.5407	0.011064	0.33482	DIS3L	DIS3 like exosome 3'-5' exoribonuclease
118924	0.31034	1624.3	0.12219	2.5398	0.011091	0.33482	FRA10AC1	FRA10A associated CGG repeat 1
10346	0.15199	10034	0.059861	2.539	0.011118	0.33482	TRIM22	tripartite motif containing 22
114908	-0.14036	15196	0.055285	-2.5388	0.011124	0.33482	TMEM123	transmembrane protein 123
9946	0.39122	1155.5	0.15412	2.5383	0.011138	0.33482	CRYZL1	crystallin zeta like 1
4052	0.24387	3293.3	0.096129	2.5369	0.011183	0.33482	LTBP1	latent transforming growth factor beta binding protein 1
93185	-0.55158	665.65	0.21743	-2.5368	0.011187	0.33482	IGSF8	immunoglobulin superfamily member 8
283450	0.20179	5227.4	0.079577	2.5358	0.01122	0.33482	HECTD4	HECT domain E3 ubiquitin protein ligase 4
5499	-0.2174	3533.2	0.085743	-2.5354	0.011231	0.33482	PPP1CA	protein phosphatase 1 catalytic subunit alpha
5480	-0.31074	1991.4	0.12265	-2.5337	0.011288	0.33482	PPIC	peptidylprolyl isomerase C
26268	0.37611	1482.5	0.14846	2.5334	0.011298	0.33482	FBXO9	F-box protein 9
9762	-0.36895	1461.9	0.14565	-2.5331	0.011306	0.33482	LZTS3	leucine zipper tumor suppressor family member 3
332	-5.9381	8.6629	2.3459	-2.5313	0.011364	0.3358	BIRC5	baculoviral IAP repeat containing 5
7009	-0.12023	28798	0.047569	-2.5275	0.011487	0.33867	TMBIM6	transmembrane BAX inhibitor motif containing 6
1282	-0.11618	57987	0.045996	-2.5258	0.011543	0.33905	COL4A1	collagen type IV alpha 1 chain
51507	-0.23714	3156.4	0.093899	-2.5255	0.011553	0.33905	RTF2	replication termination factor 2
51094	-0.20578	4307	0.081517	-2.5244	0.01159	0.33905	ADIPOR1	adiponectin receptor 1
79852	5.166	11.735	2.0472	2.5234	0.011623	0.33905	EPHX3	epoxide hydrolase 3
51090	-0.74439	289.51	0.29505	-2.5229	0.011638	0.33905	PLLP	plasmolipin
92170	0.30697	1849.2	0.12169	2.5225	0.011652	0.33905	MTG1	mitochondrial ribosome associated GTPase 1
55890	6.516	8.9461	2.5865	2.5192	0.011761	0.34147	GPRC5C	G protein-coupled receptor class C group 5 member C
23162	0.18772	9086.5	0.074556	2.5178	0.01181	0.34215	MAPK8IP3	mitogen-activated protein kinase 8 interacting protein 3
7082	0.18356	6363.7	0.072979	2.5153	0.011894	0.34385	TJP1	tight junction protein 1
1564	1.4896	86.142	0.59262	2.5136	0.011951	0.34389	CYP2D7	cytochrome P450 family 2 subfamily D member 7 (gene/pseudogene)
6804	-0.38578	1095.5	0.15351	-2.5131	0.011967	0.34389	STX1A	syntaxin 1A
9540	0.30609	2028.8	0.12181	2.5128	0.011977	0.34389	TP53I3	tumor protein p53 inducible protein 3
858	0.19125	6863.2	0.076129	2.5122	0.011999	0.34389	CAV2	caveolin 2
339122	0.38586	2209.2	0.15372	2.5101	0.012068	0.34451	RAB43	"RAB43, member RAS oncogene family"
162989	-0.35911	1143.4	0.14307	-2.51	0.012072	0.34451	DEDD2	death effector domain containing 2
3371	-6.1629	11.754	2.4563	-2.509	0.012107	0.34478	TNC	tenascin C
8312	-0.2575	2325.4	0.1027	-2.5073	0.012165	0.34547	AXIN1	axin 1
55510	-5.8942	8.8748	2.352	-2.5061	0.012209	0.34547	DDX43	DEAD-box helicase 43
2037	0.22159	4728.6	0.088442	2.5055	0.012228	0.34547	EPB41L2	erythrocyte membrane protein band 4.1 like 2
6526	-0.44694	816.38	0.1784	-2.5053	0.012235	0.34547	SLC5A3	solute carrier family 5 member 3
285513	1.1316	136.75	0.45213	2.5028	0.012322	0.34648	GPRIN3	GPRIN family member 3
79800	0.68095	362.81	0.27208	2.5028	0.012322	0.34648	CARF	calcium responsive transcription factor
3791	0.10104	34533	0.040408	2.5004	0.012404	0.34685	KDR	kinase insert domain receptor
11070	-0.24284	3291.1	0.097124	-2.5003	0.012409	0.34685	TMEM115	transmembrane protein 115
53	-0.29766	1722.6	0.11906	-2.5	0.012418	0.34685	ACP2	"acid phosphatase 2, lysosomal"
55627	0.24072	3637.3	0.096311	2.4994	0.01244	0.34685	SMPD4	sphingomyelin phosphodiesterase 4
284391	0.40891	944.73	0.16369	2.4981	0.012487	0.34709	ZNF844	zinc finger protein 844
26135	-0.15338	10358	0.061408	-2.4977	0.0125	0.34709	SERBP1	SERPINE1 mRNA binding protein 1
51363	-0.27642	2467.3	0.11076	-2.4958	0.012569	0.34827	CHST15	carbohydrate sulfotransferase 15
6185	-0.14685	11618	0.058861	-2.4948	0.012603	0.34843	RPN2	ribophorin II
153830	0.32514	3094.9	0.13037	2.494	0.012632	0.34843	RNF145	ring finger protein 145
23759	0.29538	2208.7	0.11847	2.4934	0.012653	0.34843	PPIL2	peptidylprolyl isomerase like 2
9145	0.69435	354.36	0.27865	2.4919	0.012707	0.34921	SYNGR1	synaptogyrin 1
1029	-0.22919	3544.3	0.092074	-2.4892	0.012802	0.3511	CDKN2A	cyclin dependent kinase inhibitor 2A
56834	-0.32708	1572.3	0.13151	-2.4872	0.012874	0.35179	GPR137	G protein-coupled receptor 137
1613	-0.24086	7143.3	0.096846	-2.4871	0.01288	0.35179	DAPK3	death associated protein kinase 3
975	-0.13042	27130	0.052479	-2.4851	0.012952	0.35304	CD81	CD81 molecule
29990	0.45307	1469.6	0.18237	2.4843	0.012979	0.35306	PILRB	paired immunoglobin like type 2 receptor beta
4267	-0.13955	12243	0.056199	-2.4832	0.013022	0.35349	CD99	CD99 molecule (Xg blood group)
100130827	-5.9415	6.8572	2.3934	-2.4824	0.013049	0.35351	SBK3	SH3 domain binding kinase family member 3
84317	-0.38091	1047.1	0.15351	-2.4813	0.013091	0.35353	CCDC115	coiled-coil domain containing 115
131474	-0.71873	248.19	0.28971	-2.4809	0.013106	0.35353	CHCHD4	coiled-coil-helix-coiled-coil-helix domain containing 4
25778	0.34618	1518.3	0.13958	2.4803	0.013129	0.35353	DSTYK	dual serine/threonine and tyrosine protein kinase
10398	-0.27775	1999.9	0.11203	-2.4792	0.013168	0.35386	MYL9	myosin light chain 9
8775	-0.16447	8426.4	0.066376	-2.4779	0.013216	0.35386	NAPA	NSF attachment protein alpha
3735	-0.20053	3958.2	0.080952	-2.4772	0.013242	0.35386	KARS1	lysyl-tRNA synthetase 1
9435	-0.29979	1834.3	0.12103	-2.4771	0.013247	0.35386	CHST2	carbohydrate sulfotransferase 2
9050	0.47865	900.32	0.1933	2.4762	0.013279	0.35399	PSTPIP2	proline-serine-threonine phosphatase interacting protein 2
4130	0.33536	1754	0.13551	2.4748	0.01333	0.3544	MAP1A	microtubule associated protein 1A
27285	-6.5614	7.8582	2.6517	-2.4744	0.013347	0.3544	TEKT2	tektin 2
146212	1.8221	47.76	0.73717	2.4717	0.013447	0.35583	KCTD19	potassium channel tetramerization domain containing 19
84295	0.3037	1580	0.12288	2.4715	0.013454	0.35583	PHF6	PHD finger protein 6
57148	0.18316	6212.3	0.074142	2.4704	0.013496	0.35602	RALGAPB	Ral GTPase activating protein non-catalytic subunit beta
811	-0.12841	35367	0.051991	-2.4699	0.013515	0.35602	CALR	calreticulin
339456	5.8749	8.8868	2.38	2.4684	0.013571	0.35613	TMEM52	transmembrane protein 52
84897	0.31476	1986.8	0.12752	2.4684	0.013572	0.35613	TBRG1	transforming growth factor beta regulator 1
79001	-0.27516	3468.1	0.1116	-2.4656	0.013678	0.35774	VKORC1	vitamin K epoxide reductase complex subunit 1
57699	0.48047	613.27	0.19489	2.4654	0.013687	0.35774	CPNE5	copine 5
79029	0.51029	521.59	0.20709	2.4641	0.013734	0.35786	SPATA5L1	spermatogenesis associated 5 like 1
375248	0.33528	1354.9	0.13608	2.4639	0.013745	0.35786	ANKRD36	ankyrin repeat domain 36
23117	0.23023	2898.9	0.093492	2.4625	0.013796	0.35849	NPIPB3	nuclear pore complex interacting protein family member B3
202052	0.44147	722.43	0.17948	2.4598	0.013903	0.36055	DNAJC18	DnaJ heat shock protein family (Hsp40) member C18
22798	1.3305	103.04	0.54126	2.4581	0.013969	0.36076	LAMB4	laminin subunit beta 4
8140	-0.22911	3430.2	0.093223	-2.4577	0.013983	0.36076	SLC7A5	solute carrier family 7 member 5
79171	-0.25377	3238.4	0.10326	-2.4575	0.013992	0.36076	RBM42	RNA binding motif protein 42
199223	0.4914	667.2	0.20009	2.456	0.014051	0.36125	TTC21A	tetratricopeptide repeat domain 21A
1739	0.16108	7136.8	0.065597	2.4556	0.014065	0.36125	DLG1	discs large MAGUK scaffold protein 1
7453	-0.1196	21005	0.048762	-2.4527	0.014178	0.36346	WARS1	tryptophanyl-tRNA synthetase 1
3933	-6.933	5.6504	2.8278	-2.4518	0.014216	0.36374	LCN1	lipocalin 1
149478	0.24068	3256.4	0.098271	2.4491	0.014321	0.36391	BTBD19	BTB domain containing 19
23348	0.13536	12168	0.055271	2.449	0.014327	0.36391	DOCK9	dedicator of cytokinesis 9
283237	-0.41918	766.92	0.17127	-2.4475	0.014386	0.36391	TTC9C	tetratricopeptide repeat domain 9C
64710	0.18372	6120.7	0.075079	2.447	0.014404	0.36391	NUCKS1	nuclear casein kinase and cyclin dependent kinase substrate 1
8192	-0.3418	1539.9	0.13968	-2.447	0.014406	0.36391	CLPP	caseinolytic mitochondrial matrix peptidase proteolytic subunit
94240	-0.34233	1559.8	0.13994	-2.4463	0.014435	0.36391	EPSTI1	epithelial stromal interaction 1
10493	-0.16279	34772	0.066548	-2.4462	0.014437	0.36391	VAT1	vesicle amine transport 1
2495	-0.11363	258330	0.046455	-2.4461	0.014441	0.36391	FTH1	ferritin heavy chain 1
116151	0.18762	4814.7	0.076753	2.4445	0.014506	0.364	FAM210B	family with sequence similarity 210 member B
399979	0.16424	5768	0.067194	2.4442	0.014517	0.364	SNX19	sorting nexin 19
2956	-0.3036	1785.9	0.12422	-2.444	0.014526	0.364	MSH6	mutS homolog 6
5479	-0.15002	10227	0.061405	-2.4431	0.014564	0.36425	PPIB	peptidylprolyl isomerase B
5251	0.8941	207.55	0.36623	2.4414	0.014631	0.36526	PHEX	phosphate regulating endopeptidase homolog X-linked
513	-0.2592	2171	0.10626	-2.4393	0.014715	0.36629	ATP5F1D	ATP synthase F1 subunit delta
85007	0.29933	1865.2	0.12274	2.4387	0.01474	0.36629	PHYKPL	5-phosphohydroxy-L-lysine phospho-lyase
147968	2.5317	29.206	1.0383	2.4383	0.014755	0.36629	CAPN12	calpain 12
26064	0.12909	20872	0.053003	2.4356	0.014868	0.36841	RAI14	retinoic acid induced 14
1141	-6.6062	6.4836	2.7148	-2.4334	0.014958	0.36919	CHRNB2	cholinergic receptor nicotinic beta 2 subunit
10549	-0.23644	3904.4	0.097173	-2.4332	0.014966	0.36919	PRDX4	peroxiredoxin 4
100885850	-5.8014	11.438	2.3847	-2.4328	0.014982	0.36919	PTGES3L-AARSD1	PTGES3L-AARSD1 readthrough
22893	-0.25689	2064.1	0.10573	-2.4297	0.015112	0.37133	BAHD1	bromo adjacent homology domain containing 1
54567	-0.62482	422.58	0.25719	-2.4294	0.015125	0.37133	DLL4	delta like canonical Notch ligand 4
55000	0.15871	9037.5	0.065393	2.4271	0.01522	0.373	TUG1	taurine up-regulated 1
23451	0.15639	13791	0.064509	2.4243	0.015338	0.37454	SF3B1	splicing factor 3b subunit 1
124751	0.38585	864.92	0.15916	2.4243	0.015339	0.37454	KRBA2	KRAB-A domain containing 2
129607	-0.3663	1215.8	0.15137	-2.4199	0.015524	0.37834	CMPK2	cytidine/uridine monophosphate kinase 2
285193	-0.99035	147.92	0.40982	-2.4166	0.015668	0.38118	DUSP28	dual specificity phosphatase 28
22987	-5.9837	7.2907	2.4787	-2.4141	0.015774	0.38272	SV2C	synaptic vesicle glycoprotein 2C
3339	0.1334	212380	0.055268	2.4138	0.015789	0.38272	HSPG2	heparan sulfate proteoglycan 2
84134	-0.40233	930.85	0.16688	-2.4109	0.015915	0.38474	TOMM40L	translocase of outer mitochondrial membrane 40 like
9159	0.19211	4649.4	0.079739	2.4093	0.015984	0.38474	PCSK7	proprotein convertase subtilisin/kexin type 7
22850	-0.31195	1973.5	0.12948	-2.4093	0.015985	0.38474	ADNP2	ADNP homeobox 2
168507	-0.36789	1004.2	0.15283	-2.4072	0.016077	0.38474	PKD1L1	"polycystin 1 like 1, transient receptor potential channel interacting"
5936	-0.24235	3269.3	0.10068	-2.4071	0.016081	0.38474	RBM4	RNA binding motif protein 4
84885	-0.39329	842.04	0.16344	-2.4063	0.016114	0.38474	ZDHHC12	zinc finger DHHC-type palmitoyltransferase 12
5670	5.6792	9.1634	2.3601	2.4063	0.016115	0.38474	PSG2	pregnancy specific beta-1-glycoprotein 2
79016	-0.22631	3501.9	0.09406	-2.406	0.016127	0.38474	DDA1	DET1 and DDB1 associated 1
51155	-0.25212	3229.4	0.1048	-2.4058	0.016138	0.38474	JPT1	Jupiter microtubule associated homolog 1
126792	-0.31111	1528.4	0.12938	-2.4047	0.016187	0.38474	B3GALT6	"beta-1,3-galactosyltransferase 6"
10112	-6.4026	8.1413	2.6626	-2.4046	0.016189	0.38474	KIF20A	kinesin family member 20A
57608	0.18749	7310.2	0.078012	2.4034	0.016246	0.38539	JCAD	junctional cadherin 5 associated
51645	-0.45138	754.19	0.18787	-2.4027	0.016277	0.38544	PPIL1	peptidylprolyl isomerase like 1
3135	-0.68822	260.58	0.28716	-2.3967	0.016544	0.39107	HLA-G	"major histocompatibility complex, class I, G"
6778	0.14485	9917.7	0.060471	2.3953	0.016605	0.39171	STAT6	signal transducer and activator of transcription 6
1445	-0.23965	3338	0.10007	-2.3948	0.016629	0.39171	CSK	C-terminal Src kinase
3909	0.37389	898.64	0.15623	2.3932	0.016702	0.39274	LAMA3	laminin subunit alpha 3
26157	-0.31864	1238.2	0.1332	-2.3922	0.016746	0.39305	GIMAP2	"GTPase, IMAP family member 2"
8542	-0.17025	6795.4	0.071185	-2.3916	0.016774	0.39305	APOL1	apolipoprotein L1
5702	-0.19948	3743.8	0.083466	-2.3899	0.016851	0.39416	PSMC3	"proteasome 26S subunit, ATPase 3"
9582	-6.2036	9.9213	2.5973	-2.3885	0.016919	0.39491	APOBEC3B	apolipoprotein B mRNA editing enzyme catalytic subunit 3B
89839	6.1825	5.3542	2.5893	2.3878	0.016951	0.39491	ARHGAP11B	Rho GTPase activating protein 11B
5257	0.20839	3481.1	0.087292	2.3873	0.016972	0.39491	PHKB	phosphorylase kinase regulatory subunit beta
6648	-0.093705	66651	0.039317	-2.3833	0.017158	0.39853	SOD2	superoxide dismutase 2
170961	0.91856	167.48	0.38581	2.3808	0.017273	0.40053	ANKRD24	ankyrin repeat domain 24
285362	-0.19794	4010.9	0.083186	-2.3795	0.017337	0.40055	SUMF1	sulfatase modifying factor 1
5880	-0.14858	9043.1	0.062453	-2.379	0.017359	0.40055	RAC2	Rac family small GTPase 2
6748	-0.24923	5041.6	0.10477	-2.3789	0.017365	0.40055	SSR4	signal sequence receptor subunit 4
84101	5.3978	8.3427	2.2707	2.3772	0.017446	0.40174	USP44	ubiquitin specific peptidase 44
5874	1.4913	66.272	0.62768	2.3759	0.017505	0.40192	RAB27B	"RAB27B, member RAS oncogene family"
146198	0.3049	1781.2	0.12834	2.3757	0.017514	0.40192	ZFP90	ZFP90 zinc finger protein
158584	6.2685	8.2573	2.6399	2.3745	0.017573	0.40258	FAAH2	fatty acid amide hydrolase 2
285315	-0.87484	187.51	0.36854	-2.3738	0.017607	0.40266	C3orf33	chromosome 3 open reading frame 33
54861	0.15113	9418.3	0.063696	2.3727	0.017659	0.40316	SNRK	SNF related kinase
64856	-1.144	120.47	0.48251	-2.3709	0.017742	0.40438	VWA1	von Willebrand factor A domain containing 1
9454	-0.19912	5985.5	0.084012	-2.3702	0.01778	0.40454	HOMER3	homer scaffold protein 3
64087	0.2928	1561.2	0.12367	2.3676	0.017902	0.40646	MCCC2	methylcrotonoyl-CoA carboxylase 2
9295	0.17389	8905.9	0.07346	2.3672	0.017925	0.40646	SRSF11	serine and arginine rich splicing factor 11
9925	-0.4596	701.97	0.19423	-2.3663	0.017969	0.40676	ZBTB5	zinc finger and BTB domain containing 5
165829	5.6067	8.6785	2.3704	2.3653	0.018015	0.40711	GPR156	G protein-coupled receptor 156
8106	0.23303	5079.4	0.09868	2.3615	0.018203	0.4104	PABPN1	poly(A) binding protein nuclear 1
978	-0.90094	198.94	0.38158	-2.3611	0.018221	0.4104	CDA	cytidine deaminase
6398	-0.51013	495.78	0.21626	-2.3589	0.018327	0.412	SECTM1	secreted and transmembrane 1
54540	0.2416	2451.7	0.10244	2.3584	0.018354	0.412	FAM193B	family with sequence similarity 193 member B
4214	-0.35748	1103.7	0.15168	-2.3568	0.018433	0.41253	MAP3K1	mitogen-activated protein kinase kinase kinase 1
23646	-0.15414	11591	0.065405	-2.3567	0.01844	0.41253	PLD3	phospholipase D family member 3
221806	6.2059	8.2675	2.637	2.3534	0.018604	0.41475	VWDE	von Willebrand factor D and EGF domains
80223	0.64645	380.53	0.27478	2.3526	0.018644	0.41475	RAB11FIP1	RAB11 family interacting protein 1
79763	-0.36639	930.17	0.15579	-2.3518	0.018684	0.41475	ISOC2	isochorismatase domain containing 2
78992	-0.31136	1520.5	0.13249	-2.3501	0.018767	0.41475	YIPF2	Yip1 domain family member 2
145873	-5.6461	8.3239	2.4026	-2.35	0.018774	0.41475	MESP2	mesoderm posterior bHLH transcription factor 2
90120	-0.21915	2889.4	0.093263	-2.3498	0.018783	0.41475	TMEM250	transmembrane protein 250
130535	0.48104	536.9	0.20472	2.3497	0.018787	0.41475	KCTD18	potassium channel tetramerization domain containing 18
2645	-6.615	5.7871	2.8152	-2.3497	0.018788	0.41475	GCK	glucokinase
9520	0.16376	7209	0.069759	2.3475	0.018901	0.41657	NPEPPS	aminopeptidase puromycin sensitive
399664	-0.32261	2837.3	0.13755	-2.3454	0.019008	0.41786	MEX3D	mex-3 RNA binding family member D
4842	5.7953	7.1633	2.4713	2.3451	0.019022	0.41786	NOS1	nitric oxide synthase 1
4609	-0.20189	3950	0.08612	-2.3442	0.019066	0.41814	MYC	"MYC proto-oncogene, bHLH transcription factor"
6428	-0.18529	4839.1	0.079101	-2.3424	0.019159	0.41836	SRSF3	serine and arginine rich splicing factor 3
51704	-0.19362	4899.9	0.08266	-2.3424	0.019162	0.41836	GPRC5B	G protein-coupled receptor class C group 5 member B
22824	0.2732	2448.6	0.11664	2.3422	0.01917	0.41836	HSPA4L	heat shock protein family A (Hsp70) member 4 like
285016	-6.2525	7.8279	2.6721	-2.3399	0.01929	0.41979	ALKAL2	ALK and LTK ligand 2
23659	-0.24128	2504.1	0.10313	-2.3397	0.019298	0.41979	PLA2G15	phospholipase A2 group XV
7130	-0.68509	256.05	0.2931	-2.3374	0.019417	0.42168	TNFAIP6	TNF alpha induced protein 6
80279	0.2312	3094.1	0.098957	2.3364	0.019471	0.42217	CDK5RAP3	CDK5 regulatory subunit associated protein 3
55082	0.16768	6978.1	0.071821	2.3347	0.01956	0.42341	ARGLU1	arginine and glutamate rich 1
23234	-0.49594	612	0.21252	-2.3336	0.019617	0.42377	DNAJC9	DnaJ heat shock protein family (Hsp40) member C9
23557	-0.41773	692.35	0.17904	-2.3332	0.01964	0.42377	SNAPIN	SNAP associated protein
3875	-0.27541	1906.5	0.11819	-2.3303	0.019792	0.42558	KRT18	keratin 18
1349	0.30173	1618.8	0.1295	2.3299	0.019812	0.42558	COX7B	cytochrome c oxidase subunit 7B
8473	0.18747	12797	0.08048	2.3294	0.019836	0.42558	OGT	O-linked N-acetylglucosamine (GlcNAc) transferase
4486	1.1157	96.52	0.47915	2.3286	0.019881	0.42558	MST1R	macrophage stimulating 1 receptor
29906	5.4916	9.5272	2.3585	2.3285	0.019887	0.42558	ST8SIA5	"ST8 alpha-N-acetyl-neuraminide alpha-2,8-sialyltransferase 5"
11259	-0.18087	5749.7	0.077705	-2.3277	0.019928	0.42558	FILIP1L	filamin A interacting protein 1 like
79885	-0.49752	532.31	0.21377	-2.3273	0.019947	0.42558	HDAC11	histone deacetylase 11
6676	-0.61216	312.43	0.26313	-2.3265	0.019993	0.42588	SPAG4	sperm associated antigen 4
84875	-0.22193	4703.1	0.09551	-2.3236	0.020146	0.42712	PARP10	poly(ADP-ribose) polymerase family member 10
3300	-0.23225	2868.5	0.099978	-2.323	0.02018	0.42712	DNAJB2	DnaJ heat shock protein family (Hsp40) member B2
90993	-0.40471	825.25	0.17425	-2.3226	0.020201	0.42712	CREB3L1	cAMP responsive element binding protein 3 like 1
11067	-0.12318	17580	0.053035	-2.3226	0.020202	0.42712	DEPP1	DEPP1 autophagy regulator
387921	0.34239	1077.6	0.14743	2.3224	0.020211	0.42712	NHLRC3	NHL repeat containing 3
11136	4.7042	9.5916	2.0265	2.3214	0.020265	0.42759	SLC7A9	solute carrier family 7 member 9
56926	-0.23364	4965.6	0.10072	-2.3198	0.020352	0.42824	NCLN	nicalin
388849	0.45455	695.27	0.19599	2.3193	0.02038	0.42824	CCDC188	coiled-coil domain containing 188
23241	0.16415	6429.1	0.070782	2.319	0.020392	0.42824	PACS2	phosphofurin acidic cluster sorting protein 2
25896	-0.47505	594.4	0.20493	-2.3181	0.020443	0.42863	INTS7	integrator complex subunit 7
23139	0.21188	3874.1	0.091457	2.3167	0.020519	0.42956	MAST2	microtubule associated serine/threonine kinase 2
1490	-0.090155	65241	0.038941	-2.3151	0.020605	0.43014	CCN2	cellular communication network factor 2
79649	0.25785	2263.8	0.11138	2.315	0.020612	0.43014	MAP7D3	MAP7 domain containing 3
10811	0.6216	321.12	0.26891	2.3116	0.020801	0.43249	NOXA1	NADPH oxidase activator 1
1462	0.55284	416.43	0.23919	2.3113	0.020817	0.43249	VCAN	versican
10938	-0.26336	3905.9	0.11398	-2.3106	0.020853	0.43249	EHD1	EH domain containing 1
6894	0.33512	1720.4	0.14503	2.3106	0.020854	0.43249	TARBP1	TAR (HIV-1) RNA binding protein 1
283554	-1.288	85.004	0.5578	-2.309	0.020942	0.43341	GPR137C	G protein-coupled receptor 137C
3732	-0.22248	2553.4	0.09639	-2.3081	0.020991	0.43341	CD82	CD82 molecule
23169	0.4793	559.22	0.20767	2.308	0.021	0.43341	SLC35D1	solute carrier family 35 member D1
8367	-5.666	8.893	2.456	-2.3071	0.021051	0.43341	H4C5	H4 clustered histone 5
10959	-0.14537	8227.4	0.063013	-2.3069	0.02106	0.43341	TMED2	transmembrane p24 trafficking protein 2
7388	0.21769	2949.8	0.094407	2.3058	0.02112	0.43348	UQCRH	ubiquinol-cytochrome c reductase hinge protein
220001	0.36846	1097.2	0.15981	2.3057	0.021129	0.43348	VWCE	von Willebrand factor C and EGF domains
116211	-6.0564	5.1868	2.6297	-2.3031	0.021274	0.43578	TM4SF19	transmembrane 4 L six family member 19
115201	0.32294	1280.3	0.1403	2.3017	0.02135	0.43667	ATG4A	autophagy related 4A cysteine peptidase
22885	0.14649	8079.4	0.06373	2.2986	0.021526	0.43959	ABLIM3	actin binding LIM protein family member 3
10957	-0.18137	3872.3	0.078925	-2.2981	0.021558	0.43959	PNRC1	proline rich nuclear receptor coactivator 1
54973	-0.19752	3518.4	0.086201	-2.2914	0.021943	0.44666	INTS11	integrator complex subunit 11
100506374	3.3666	15.372	1.4699	2.2903	0.022004	0.44666	EDDM13	epididymal protein 13
60314	-0.76581	314.1	0.33438	-2.2903	0.022005	0.44666	C12orf10	chromosome 12 open reading frame 10
197131	0.27289	2496.7	0.11922	2.2889	0.022086	0.44762	UBR1	ubiquitin protein ligase E3 component n-recognin 1
9744	3.4832	15.64	1.5224	2.288	0.022139	0.448	ACAP1	"ArfGAP with coiled-coil, ankyrin repeat and PH domains 1"
91949	0.38925	885.57	0.17019	2.2872	0.022186	0.44828	COG7	component of oligomeric golgi complex 7
23264	-0.15096	11910	0.066058	-2.2853	0.022294	0.44946	ZC3H7B	zinc finger CCCH-type containing 7B
222389	0.29712	1538	0.13005	2.2846	0.022337	0.44946	BEND7	BEN domain containing 7
90113	5.5812	7.6196	2.444	2.2836	0.022394	0.44946	VWA5B2	von Willebrand factor A domain containing 5B2
23463	-0.1838	4075.9	0.080516	-2.2828	0.022443	0.44946	ICMT	isoprenylcysteine carboxyl methyltransferase
81858	-0.25665	1977	0.11245	-2.2824	0.022467	0.44946	SHARPIN	SHANK associated RH domain interactor
351	0.086721	122680	0.037998	2.2823	0.022473	0.44946	APP	amyloid beta precursor protein
57506	0.15659	9155	0.068614	2.2822	0.02248	0.44946	MAVS	mitochondrial antiviral signaling protein
83479	0.50009	476.19	0.21918	2.2816	0.022514	0.44947	DDX59	DEAD-box helicase 59
11282	-0.11284	15191	0.049475	-2.2808	0.022558	0.44968	MGAT4B	"alpha-1,3-mannosyl-glycoprotein 4-beta-N-acetylglucosaminyltransferase B"
56129	-1.5235	70.822	0.66875	-2.2781	0.02272	0.45142	PCDHB7	protocadherin beta 7
5688	-0.16921	6387.1	0.074303	-2.2773	0.022767	0.45142	PSMA7	proteasome 20S subunit alpha 7
1999	5.5801	4.8658	2.4508	2.2768	0.022798	0.45142	ELF3	E74 like ETS transcription factor 3
79869	0.21341	2859.7	0.093737	2.2766	0.022807	0.45142	CPSF7	cleavage and polyadenylation specific factor 7
11173	0.18924	8781	0.083133	2.2764	0.022824	0.45142	ADAMTS7	ADAM metallopeptidase with thrombospondin type 1 motif 7
51334	-5.4995	9.0908	2.417	-2.2753	0.022887	0.45142	PRR16	proline rich 16
23516	-0.17032	5786	0.074899	-2.2739	0.022969	0.45142	SLC39A14	solute carrier family 39 member 14
9923	0.22324	3302.6	0.098174	2.2739	0.02297	0.45142	ZBTB40	zinc finger and BTB domain containing 40
9079	0.21562	2748.6	0.094822	2.2739	0.02297	0.45142	LDB2	LIM domain binding 2
51091	0.47445	583.09	0.20867	2.2737	0.022983	0.45142	SEPSECS	Sep (O-phosphoserine) tRNA:Sec (selenocysteine) tRNA synthase
56904	0.20202	3498.9	0.088898	2.2725	0.023057	0.45205	SH3GLB2	"SH3 domain containing GRB2 like, endophilin B2"
4718	-0.21953	3146.3	0.096624	-2.2721	0.023083	0.45205	NDUFC2	NADH:ubiquinone oxidoreductase subunit C2
90987	0.37665	1080.9	0.16582	2.2715	0.023118	0.45207	ZNF251	zinc finger protein 251
285971	-0.50306	525.84	0.22161	-2.27	0.023206	0.45274	ZNF775	zinc finger protein 775
7531	-0.11281	17863	0.049699	-2.2698	0.02322	0.45274	YWHAE	tyrosine 3-monooxygenase/tryptophan 5-monooxygenase activation protein epsilon
7167	-0.13224	20544	0.058329	-2.2671	0.023382	0.45431	TPI1	triosephosphate isomerase 1
6709	0.12656	26589	0.05585	2.266	0.02345	0.45431	SPTAN1	"spectrin alpha, non-erythrocytic 1"
5774	5.8843	8.3002	2.5977	2.2652	0.023502	0.45431	PTPN3	protein tyrosine phosphatase non-receptor type 3
55175	0.37942	1008.7	0.16758	2.2641	0.02357	0.45431	KLHL11	kelch like family member 11
200030	0.35498	1214.1	0.15681	2.2638	0.023585	0.45431	NBPF11	NBPF member 11
22853	0.21602	3529.1	0.095424	2.2637	0.02359	0.45431	LMTK2	lemur tyrosine kinase 2
124637	-0.78842	271.35	0.34834	-2.2633	0.023614	0.45431	CYB5D1	cytochrome b5 domain containing 1
161725	6.1428	7.2545	2.7144	2.263	0.023633	0.45431	OTUD7A	OTU deubiquitinase 7A
64419	-0.2525	2075.9	0.11158	-2.263	0.023633	0.45431	MTMR14	myotubularin related protein 14
6336	-5.7182	6.4665	2.5271	-2.2628	0.02365	0.45431	SCN10A	sodium voltage-gated channel alpha subunit 10
55108	-0.17008	5028.8	0.075183	-2.2623	0.023681	0.45431	BSDC1	BSD domain containing 1
10963	-0.1902	7855	0.084091	-2.2618	0.023709	0.45431	STIP1	stress induced phosphoprotein 1
54103	0.44529	560.6	0.19719	2.2582	0.023933	0.45794	GSAP	gamma-secretase activating protein
644100	4.7414	10.358	2.1012	2.2565	0.024041	0.45871	ARL14EPL	ADP ribosylation factor like GTPase 14 effector protein like
9747	0.20865	2834.1	0.092466	2.2565	0.024041	0.45871	TCAF1	TRPM8 channel associated factor 1
2023	-0.11475	40947	0.050867	-2.2559	0.02408	0.45879	ENO1	enolase 1
259307	-0.54927	419.88	0.24364	-2.2545	0.024166	0.4594	IL4I1	interleukin 4 induced 1
10581	-0.23002	4520.6	0.10209	-2.2531	0.024255	0.4594	IFITM2	interferon induced transmembrane protein 2
2246	5.8895	5.6714	2.6145	2.2527	0.024279	0.4594	FGF1	fibroblast growth factor 1
5165	0.48341	636.14	0.21466	2.252	0.024324	0.4594	PDK3	pyruvate dehydrogenase kinase 3
79931	-0.51516	458.47	0.2289	-2.2506	0.024409	0.4594	TNIP3	TNFAIP3 interacting protein 3
583	0.26289	2149.2	0.11682	2.2504	0.024423	0.4594	BBS2	Bardet-Biedl syndrome 2
64837	-0.25057	3168.7	0.11143	-2.2488	0.024528	0.4594	KLC2	kinesin light chain 2
925	6.6374	5.1809	2.9522	2.2483	0.024556	0.4594	CD8A	CD8a molecule
112	0.20765	4561.8	0.09237	2.248	0.024575	0.4594	ADCY6	adenylate cyclase 6
1915	0.075426	220320	0.033553	2.248	0.024578	0.4594	EEF1A1	eukaryotic translation elongation factor 1 alpha 1
55343	-0.31565	1629	0.14043	-2.2478	0.024592	0.4594	SLC35C1	solute carrier family 35 member C1
7528	-0.1594	4998.4	0.070915	-2.2477	0.024593	0.4594	YY1	YY1 transcription factor
56548	-0.54052	525.52	0.24048	-2.2476	0.024599	0.4594	CHST7	carbohydrate sulfotransferase 7
5143	2.1283	38.944	0.94724	2.2468	0.024652	0.4594	PDE4C	phosphodiesterase 4C
378708	-0.69394	215.72	0.30889	-2.2466	0.024666	0.4594	CENPS	centromere protein S
23208	-0.187	4534.7	0.083245	-2.2463	0.024684	0.4594	SYT11	synaptotagmin 11
23654	0.17559	12115	0.078176	2.2461	0.024697	0.4594	PLXNB2	plexin B2
57519	0.23874	2509	0.10643	2.2432	0.024883	0.4622	STARD9	StAR related lipid transfer domain containing 9
7158	0.16458	5473.5	0.073383	2.2427	0.024916	0.4622	TP53BP1	tumor protein p53 binding protein 1
125950	-0.30463	1842.2	0.13589	-2.2418	0.024976	0.46265	RAVER1	"ribonucleoprotein, PTB binding 1"
2919	-0.16276	10295	0.072652	-2.2402	0.025076	0.4633	CXCL1	C-X-C motif chemokine ligand 1
92667	0.51699	446.78	0.23079	2.2401	0.025084	0.4633	MGME1	mitochondrial genome maintenance exonuclease 1
8021	0.21694	2904.4	0.096874	2.2394	0.02513	0.4633	NUP214	nucleoporin 214
29062	0.41887	667.26	0.18707	2.2391	0.025149	0.4633	WDR91	WD repeat domain 91
7059	0.30797	1410.9	0.13763	2.2376	0.025245	0.46336	THBS3	thrombospondin 3
10072	-0.24273	2070.1	0.10851	-2.237	0.025283	0.46336	DPP3	dipeptidyl peptidase 3
1947	-0.21072	6300.2	0.094206	-2.2368	0.025299	0.46336	EFNB1	ephrin B1
9552	-0.31471	1323.5	0.14074	-2.2361	0.025346	0.46336	SPAG7	sperm associated antigen 7
9960	0.26269	1672.7	0.11748	2.236	0.02535	0.46336	USP3	ubiquitin specific peptidase 3
90231	-0.21205	4042.8	0.094839	-2.2359	0.025361	0.46336	KIAA2013	KIAA2013
5364	0.25932	2615.8	0.11601	2.2352	0.025403	0.46349	PLXNB1	plexin B1
10055	-0.19778	4853.9	0.088602	-2.2322	0.0256	0.46646	SAE1	SUMO1 activating enzyme subunit 1
90952	-0.12572	10402	0.056349	-2.2312	0.025669	0.46707	ESAM	endothelial cell adhesion molecule
10618	0.12273	16597	0.05503	2.2303	0.025728	0.46751	TGOLN2	trans-golgi network protein 2
138311	-0.19516	4334.7	0.087541	-2.2293	0.025791	0.46802	DIPK1B	divergent protein kinase domain 1B
84992	-0.35416	1985.9	0.15893	-2.2284	0.025854	0.46809	PIGY	phosphatidylinositol glycan anchor biosynthesis class Y
345895	6.0661	7.4219	2.7226	2.228	0.025877	0.46809	RSPH4A	radial spoke head component 4A
388125	-0.63766	338.41	0.28624	-2.2277	0.0259	0.46809	C2CD4B	C2 calcium dependent domain containing 4B
90273	-1.4951	57.249	0.67149	-2.2265	0.025982	0.46894	CEACAM21	CEA cell adhesion molecule 21
3925	-0.30209	1288.6	0.13588	-2.2232	0.026202	0.4722	STMN1	stathmin 1
9229	-6.3742	4.5045	2.8691	-2.2217	0.026305	0.4722	DLGAP1	DLG associated protein 1
84894	-5.2155	7.2824	2.3476	-2.2216	0.026308	0.4722	LINGO1	leucine rich repeat and Ig domain containing 1
57479	-0.26739	2960.1	0.12044	-2.2201	0.026411	0.4722	PRR12	proline rich 12
9310	-0.81161	221.5	0.36568	-2.2195	0.026455	0.4722	ZNF235	zinc finger protein 235
6611	-0.1946	3365.3	0.087692	-2.2191	0.02648	0.4722	SMS	spermine synthase
5582	-5.8949	8.3727	2.6567	-2.2189	0.026495	0.4722	PRKCG	protein kinase C gamma
7466	-0.20056	5543.9	0.090394	-2.2188	0.026501	0.4722	WFS1	wolframin ER transmembrane glycoprotein
55739	-0.27731	1550.3	0.12503	-2.2179	0.026562	0.4722	NAXD	NAD(P)HX dehydratase
26071	-0.31099	1282.1	0.14022	-2.2179	0.026564	0.4722	RTL8A	retrotransposon Gag like 8A
4150	-0.23116	3911.7	0.10424	-2.2176	0.026579	0.4722	MAZ	MYC associated zinc finger protein
3257	-0.1853	3885.7	0.083559	-2.2175	0.026587	0.4722	HPS1	HPS1 biogenesis of lysosomal organelles complex 3 subunit 1
23630	-4.0106	16.298	1.8091	-2.217	0.026625	0.47225	KCNE5	potassium voltage-gated channel subfamily E regulatory subunit 5
57526	-0.62784	271.58	0.28338	-2.2155	0.026724	0.47256	PCDH19	protocadherin 19
57724	0.19112	4784	0.086274	2.2153	0.026742	0.47256	EPG5	ectopic P-granules autophagy protein 5 homolog
81693	6.1966	6.3597	2.7973	2.2152	0.026749	0.47256	AMN	amnion associated transmembrane protein
51604	-0.18417	5098	0.083218	-2.2131	0.026892	0.47345	PIGT	phosphatidylinositol glycan anchor biosynthesis class T
128434	-0.8204	178.95	0.37073	-2.2129	0.026902	0.47345	VSTM2L	V-set and transmembrane domain containing 2 like
3030	-0.13032	11374	0.058911	-2.2122	0.026953	0.47345	HADHA	hydroxyacyl-CoA dehydrogenase trifunctional multienzyme complex subunit alpha
10616	-0.14824	6975.8	0.067016	-2.212	0.026967	0.47345	RBCK1	RANBP2-type and C3HC4-type zinc finger containing 1
341676	5.829	8.5559	2.6353	2.2119	0.026976	0.47345	NEK5	NIMA related kinase 5
1603	-0.16998	5250.9	0.076898	-2.2104	0.027074	0.47454	DAD1	defender against cell death 1
25775	-6.3507	5.878	2.875	-2.2089	0.027179	0.47575	C22orf24	chromosome 22 open reading frame 24
7424	-0.31323	1290.3	0.14193	-2.207	0.027312	0.4759	VEGFC	vascular endothelial growth factor C
1026	0.097418	25893	0.044144	2.2068	0.027325	0.4759	CDKN1A	cyclin dependent kinase inhibitor 1A
11047	-0.18392	5175	0.083377	-2.2059	0.027389	0.4759	ADRM1	adhesion regulating molecule 1
1192	-0.16046	10757	0.072742	-2.2059	0.027391	0.4759	CLIC1	chloride intracellular channel 1
283927	1.051	97.192	0.47645	2.2059	0.027393	0.4759	NUDT7	nudix hydrolase 7
11100	0.14954	8415	0.067797	2.2058	0.027401	0.4759	HNRNPUL1	heterogeneous nuclear ribonucleoprotein U like 1
25912	-0.17288	6451.3	0.078402	-2.2051	0.027447	0.47609	C1orf43	chromosome 1 open reading frame 43
145508	-1.2773	84.311	0.57946	-2.2042	0.027508	0.47652	CEP128	centrosomal protein 128
64857	0.22506	3287.1	0.10219	2.2024	0.027636	0.47812	PLEKHG2	pleckstrin homology and RhoGEF domain containing G2
84129	0.3692	1473.3	0.16775	2.201	0.027739	0.47885	ACAD11	acyl-CoA dehydrogenase family member 11
10488	-0.23532	2641.8	0.10692	-2.2008	0.02775	0.47885	CREB3	cAMP responsive element binding protein 3
168850	-0.27934	1485.4	0.12697	-2.2001	0.027799	0.47907	ZNF800	zinc finger protein 800
9459	0.4692	633.45	0.21337	2.199	0.027878	0.47982	ARHGEF6	Rac/Cdc42 guanine nucleotide exchange factor 6
342357	0.46965	514.29	0.21364	2.1983	0.02793	0.4801	ZKSCAN2	zinc finger with KRAB and SCAN domains 2
23338	-0.2156	3677.1	0.098127	-2.1972	0.028008	0.48078	JADE2	jade family PHD finger 2
50838	-4.1647	11.026	1.8959	-2.1967	0.028042	0.48078	TAS2R13	taste 2 receptor member 13
22839	-0.16728	6293.2	0.076185	-2.1957	0.028113	0.4811	DLGAP4	DLG associated protein 4
259295	1.2004	75.968	0.54685	2.1951	0.028159	0.4811	TAS2R20	taste 2 receptor member 20
6665	-5.0693	9.8826	2.3095	-2.1949	0.028168	0.4811	SOX15	SRY-box transcription factor 15
8216	0.19345	3383.2	0.088225	2.1927	0.028332	0.48327	LZTR1	leucine zipper like transcription regulator 1
150223	-0.43202	836.04	0.19721	-2.1906	0.028481	0.48388	YDJC	YdjC chitooligosaccharide deacetylase homolog
2683	-0.14871	5677.6	0.067899	-2.1901	0.028514	0.48388	B4GALT1	"beta-1,4-galactosyltransferase 1"
131601	-0.23295	2155.6	0.10639	-2.1895	0.028559	0.48388	TPRA1	transmembrane protein adipocyte associated 1
83595	-0.17036	4275.9	0.077812	-2.1894	0.028571	0.48388	SOX7	SRY-box transcription factor 7
57459	0.25378	3231.1	0.11592	2.1893	0.028578	0.48388	GATAD2B	GATA zinc finger domain containing 2B
23328	0.15127	11244	0.069103	2.189	0.028595	0.48388	SASH1	SAM and SH3 domain containing 1
1316	0.13866	10656	0.063362	2.1884	0.028639	0.48388	KLF6	Kruppel like factor 6
6374	-0.48239	447.04	0.22045	-2.1882	0.028657	0.48388	CXCL5	C-X-C motif chemokine ligand 5
178	0.31514	1166.3	0.14415	2.1862	0.028798	0.48564	AGL	"amylo-alpha-1, 6-glucosidase, 4-alpha-glucanotransferase"
11062	0.97593	196.25	0.4467	2.1847	0.028907	0.48687	DUS4L	dihydrouridine synthase 4 like
79153	0.62344	294.99	0.28546	2.184	0.028965	0.48691	GDPD3	glycerophosphodiester phosphodiesterase domain containing 3
10565	0.1901	4354.7	0.08706	2.1836	0.028995	0.48691	ARFGEF1	ADP ribosylation factor guanine nucleotide exchange factor 1
8875	-5.4154	7.5008	2.4808	-2.1829	0.029043	0.48691	VNN2	vanin 2
162967	0.26998	1472.4	0.1237	2.1825	0.029073	0.48691	ZNF320	zinc finger protein 320
56731	-0.26892	1798.5	0.12323	-2.1822	0.029092	0.48691	SLC2A4RG	SLC2A4 regulator
472	0.19986	4592	0.091643	2.1809	0.029192	0.48787	ATM	ATM serine/threonine kinase
25834	2.465	23.225	1.1305	2.1805	0.029222	0.48787	MGAT4C	MGAT4 family member C
25963	-0.26326	1653.6	0.12083	-2.1788	0.029344	0.48909	TMEM87A	transmembrane protein 87A
7175	0.15786	7566.2	0.072463	2.1785	0.029369	0.48909	TPR	"translocated promoter region, nuclear basket protein"
22861	0.17832	4070.7	0.081984	2.1751	0.029623	0.49225	NLRP1	NLR family pyrin domain containing 1
51177	-0.18735	4316.5	0.086141	-2.175	0.029632	0.49225	PLEKHO1	pleckstrin homology domain containing O1
402682	-2.1226	33.254	0.97677	-2.173	0.029778	0.49405	UFSP1	UFM1 specific peptidase 1 (inactive)
308	-0.11316	26023	0.052112	-2.1716	0.029889	0.49529	ANXA5	annexin A5
7058	1.6973	63.581	0.78179	2.171	0.029929	0.49533	THBS2	thrombospondin 2
10623	-0.24798	1747.7	0.11426	-2.1703	0.029982	0.49559	POLR3C	RNA polymerase III subunit C
10417	6.2235	4.906	2.8688	2.1693	0.030057	0.49622	SPON2	spondin 2
84226	1.0853	102.79	0.50057	2.1681	0.030149	0.49713	C2orf16	chromosome 2 open reading frame 16
54890	-0.17735	4686.8	0.081864	-2.1665	0.030276	0.4986	ALKBH5	"alkB homolog 5, RNA demethylase"
6747	-0.11813	12041	0.054548	-2.1657	0.030335	0.49863	SSR3	signal sequence receptor subunit 3
54873	0.15615	5168	0.072123	2.1651	0.03038	0.49863	PALMD	palmdelphin
79594	-0.26607	1875.2	0.12291	-2.1647	0.030408	0.49863	MUL1	mitochondrial E3 ubiquitin protein ligase 1
115939	-0.23863	2183.2	0.11029	-2.1636	0.030495	0.49863	TSR3	TSR3 ribosome maturation factor
131578	-3.5183	15.528	1.6262	-2.1635	0.030502	0.49863	LRRC15	leucine rich repeat containing 15
347734	-0.24427	2503.2	0.11294	-2.1629	0.030545	0.49863	SLC35B2	solute carrier family 35 member B2
8425	-0.39807	1269.4	0.18404	-2.1629	0.030548	0.49863	LTBP4	latent transforming growth factor beta binding protein 4
89797	0.11979	16028	0.055398	2.1623	0.030591	0.49863	NAV2	neuron navigator 2
55049	-0.3005	1316.9	0.13903	-2.1613	0.030672	0.49863	REX1BD	required for excision 1-B domain containing
1295	-0.079777	48794	0.036918	-2.1609	0.0307	0.49863	COL8A1	collagen type VIII alpha 1 chain
55466	-0.26019	1940.4	0.12043	-2.1605	0.030735	0.49863	DNAJA4	DnaJ heat shock protein family (Hsp40) member A4
7699	-0.60359	516.93	0.2794	-2.1603	0.03075	0.49863	ZNF140	zinc finger protein 140
2519	-0.23114	2734.8	0.107	-2.1601	0.030766	0.49863	FUCA2	alpha-L-fucosidase 2
283455	0.55006	491.45	0.2547	2.1596	0.0308	0.49863	KSR2	kinase suppressor of ras 2
56136	3.0667	25.076	1.421	2.1581	0.030916	0.49935	PCDHA13	protocadherin alpha 13
728819	3.4815	13.503	1.6136	2.1576	0.030956	0.49935	C1GALT1C1L	C1GALT1 specific chaperone 1 like
5411	0.1739	5341.3	0.080599	2.1576	0.030957	0.49935	PNN	"pinin, desmosome associated protein"
130733	-2.2595	41.237	1.0475	-2.1571	0.030997	0.49939	TMEM178A	transmembrane protein 178A
51596	-0.2186	2271.9	0.10142	-2.1553	0.031138	0.49975	CUTA	cutA divalent cation tolerance homolog
203260	-0.39684	713.04	0.18419	-2.1545	0.031201	0.49975	CCDC107	coiled-coil domain containing 107
200895	0.51534	419.26	0.23924	2.1541	0.031232	0.49975	DHFR2	dihydrofolate reductase 2
4705	0.18363	3853.4	0.085257	2.1538	0.031255	0.49975	NDUFA10	NADH:ubiquinone oxidoreductase subunit A10
8085	0.13843	14030	0.06428	2.1535	0.031283	0.49975	KMT2D	lysine methyltransferase 2D
23585	-0.13945	7241.2	0.064764	-2.1532	0.031305	0.49975	TMEM50A	transmembrane protein 50A
5664	-0.31458	1213.6	0.14618	-2.152	0.031396	0.49975	PSEN2	presenilin 2
9732	0.13444	11171	0.062483	2.1516	0.03143	0.49975	DOCK4	dedicator of cytokinesis 4
170692	0.25787	2437.1	0.11991	2.1505	0.031518	0.49975	ADAMTS18	ADAM metallopeptidase with thrombospondin type 1 motif 18
163131	0.35796	969.1	0.16653	2.1495	0.031594	0.49975	ZNF780B	zinc finger protein 780B
29844	-0.37532	1098.1	0.17469	-2.1485	0.031675	0.49975	TFPT	TCF3 fusion partner
283431	-0.48343	580.73	0.22506	-2.148	0.031716	0.49975	GAS2L3	growth arrest specific 2 like 3
9467	-0.12848	8951.1	0.059823	-2.1476	0.031742	0.49975	SH3BP5	SH3 domain binding protein 5
5621	-0.11228	20654	0.052281	-2.1476	0.031749	0.49975	PRNP	prion protein
91304	-0.1531	11233	0.071306	-2.1471	0.031783	0.49975	TMEM259	transmembrane protein 259
84522	-0.29283	1325.8	0.13639	-2.1471	0.031789	0.49975	JAGN1	jagunal homolog 1
7280	-0.31154	1286.1	0.1451	-2.147	0.03179	0.49975	TUBB2A	tubulin beta 2A class IIa
9448	0.11109	33141	0.051751	2.1467	0.031817	0.49975	MAP4K4	mitogen-activated protein kinase kinase kinase kinase 4
6373	-0.81804	229.64	0.38114	-2.1463	0.031851	0.49975	CXCL11	C-X-C motif chemokine ligand 11
4430	-0.1898	3815	0.088456	-2.1457	0.031897	0.49975	MYO1B	myosin IB
9880	-0.41564	651.33	0.19373	-2.1455	0.031912	0.49975	ZBTB39	zinc finger and BTB domain containing 39
3955	-0.61461	267.92	0.28652	-2.1451	0.031946	0.49975	LFNG	LFNG O-fucosylpeptide 3-beta-N-acetylglucosaminyltransferase
619279	0.40664	730.34	0.18959	2.1449	0.03196	0.49975	ZNF704	zinc finger protein 704
5604	-0.15686	5110.9	0.073141	-2.1447	0.03198	0.49975	MAP2K1	mitogen-activated protein kinase kinase 1
81786	-0.50451	373.21	0.23531	-2.1441	0.032028	0.49975	TRIM7	tripartite motif containing 7
80169	0.25326	2209.6	0.11814	2.1438	0.032048	0.49975	CTC1	CST telomere replication complex component 1
122773	0.93567	157.61	0.43656	2.1433	0.032089	0.49975	KLHDC1	kelch domain containing 1
57488	0.17216	4410.1	0.080325	2.1433	0.032092	0.49975	ESYT2	extended synaptotagmin 2
9990	0.21298	3236.3	0.099378	2.1431	0.032104	0.49975	SLC12A6	solute carrier family 12 member 6
5244	2.0493	30.13	0.95664	2.1422	0.032178	0.50015	ABCB4	ATP binding cassette subfamily B member 4
196883	0.21537	2740.2	0.10055	2.1419	0.032205	0.50015	ADCY4	adenylate cyclase 4
54855	-1.7238	39.734	0.80521	-2.1408	0.032293	0.5004	TENT5C	terminal nucleotidyltransferase 5C
5371	-0.164	9446.8	0.076614	-2.1406	0.032306	0.5004	PML	promyelocytic leukemia
101410538	-0.26077	1815.8	0.12184	-2.1403	0.032333	0.5004	MMP24OS	MMP24 opposite strand
22900	0.13866	9342.7	0.064815	2.1393	0.03241	0.50092	CARD8	caspase recruitment domain family member 8
4245	-0.16466	7866	0.076981	-2.1389	0.032442	0.50092	MGAT1	"alpha-1,3-mannosyl-glycoprotein 2-beta-N-acetylglucosaminyltransferase"
537	-0.13746	11486	0.06428	-2.1384	0.032485	0.50101	ATP6AP1	ATPase H+ transporting accessory protein 1
5277	-0.6091	350.42	0.28492	-2.1378	0.032535	0.5011	PIGA	phosphatidylinositol glycan anchor biosynthesis class A
2962	-0.2035	4271.7	0.09523	-2.137	0.0326	0.5011	GTF2F1	general transcription factor IIF subunit 1
56882	0.17607	3890.4	0.082398	2.1369	0.032609	0.5011	CDC42SE1	CDC42 small effector 1
84952	0.22767	3025.3	0.10658	2.1362	0.032664	0.5011	CGNL1	cingulin like 1
5793	0.26528	2420	0.1242	2.1358	0.032694	0.5011	PTPRG	protein tyrosine phosphatase receptor type G
1605	-0.17167	7168.9	0.080386	-2.1355	0.032717	0.5011	DAG1	dystroglycan 1
22948	-0.1521	7335.1	0.071275	-2.134	0.032843	0.50216	CCT5	chaperonin containing TCP1 subunit 5
8846	0.55119	454.44	0.25832	2.1338	0.032861	0.50216	ALKBH1	"alkB homolog 1, histone H2A dioxygenase"
100506540	2.4624	26.114	1.1558	2.1304	0.033137	0.50581	SPTY2D1OS	SPTY2D1 opposite strand
10956	-0.12085	16961	0.056767	-2.1288	0.033268	0.50663	OS9	OS9 endoplasmic reticulum lectin
90557	0.89136	231.3	0.41877	2.1285	0.033294	0.50663	CCDC74A	coiled-coil domain containing 74A
5307	6.3624	6.9976	2.9893	2.1284	0.033305	0.50663	PITX1	paired like homeodomain 1
22848	0.18613	4081.6	0.087506	2.127	0.033418	0.50751	AAK1	AP2 associated kinase 1
148113	-6.0101	6.2434	2.8265	-2.1264	0.033472	0.50751	CILP2	cartilage intermediate layer protein 2
114881	0.34223	1260.7	0.16105	2.125	0.033583	0.50751	OSBPL7	oxysterol binding protein like 7
80179	0.24222	2325.6	0.11401	2.1245	0.033631	0.50751	MYO19	myosin XIX
1978	-0.27899	2405.8	0.13135	-2.124	0.033666	0.50751	EIF4EBP1	eukaryotic translation initiation factor 4E binding protein 1
7078	-1.0705	90.77	0.50401	-2.1239	0.033677	0.50751	TIMP3	TIMP metallopeptidase inhibitor 3
29956	-0.15406	6210.5	0.072551	-2.1235	0.033711	0.50751	CERS2	ceramide synthase 2
8836	-0.23177	3211.2	0.10916	-2.1231	0.033742	0.50751	GGH	gamma-glutamyl hydrolase
10555	-0.252	2235.5	0.1187	-2.1231	0.033746	0.50751	AGPAT2	1-acylglycerol-3-phosphate O-acyltransferase 2
92335	0.24861	2159	0.11713	2.1226	0.03379	0.50751	STRADA	STE20 related adaptor alpha
4363	0.13221	10805	0.062305	2.122	0.033835	0.50751	ABCC1	ATP binding cassette subfamily C member 1
51571	-0.31661	1152.5	0.14922	-2.1218	0.033853	0.50751	CYRIB	CYFIP related Rac1 interactor B
55784	5.3474	7.6586	2.5203	2.1218	0.033856	0.50751	MCTP2	multiple C2 and transmembrane domain containing 2
27069	-0.14167	6414.9	0.066789	-2.1212	0.033904	0.50765	GHITM	growth hormone inducible transmembrane protein
10421	-0.19943	3585.3	0.09405	-2.1205	0.033965	0.50799	CD2BP2	CD2 cytoplasmic tail binding protein 2
84173	0.39786	799.47	0.18798	2.1165	0.034301	0.51182	ELMOD3	ELMO domain containing 3
3569	-0.28833	2270.3	0.13624	-2.1163	0.034317	0.51182	IL6	interleukin 6
219285	-0.15665	6955.2	0.074028	-2.1161	0.034336	0.51182	SAMD9L	sterile alpha motif domain containing 9 like
201254	-0.42619	593.82	0.20148	-2.1153	0.034402	0.51224	CENPX	centromere protein X
90313	-0.34293	1202.5	0.16246	-2.1108	0.034787	0.51644	TP53I13	tumor protein p53 inducible protein 13
49854	-0.34298	1405.4	0.1625	-2.1107	0.034799	0.51644	ZBTB21	zinc finger and BTB domain containing 21
4515	-1.0998	108.21	0.52104	-2.1107	0.0348	0.51644	MTCP1	mature T cell proliferation 1
3692	-0.21245	3335	0.10071	-2.1096	0.034897	0.51729	EIF6	eukaryotic translation initiation factor 6
110806280	-0.74466	171.47	0.35328	-2.1079	0.035044	0.51889	CCDC194	coiled-coil domain containing 194
6494	-0.19554	3014.8	0.092792	-2.1073	0.035093	0.51905	SIPA1	signal-induced proliferation-associated 1
5429	0.18084	3276.9	0.085854	2.1064	0.03517	0.51925	POLH	DNA polymerase eta
84243	-0.23386	1842.6	0.11106	-2.1057	0.035234	0.51925	ZDHHC18	zinc finger DHHC-type palmitoyltransferase 18
2963	-0.37273	787.82	0.17708	-2.1049	0.035297	0.51925	GTF2F2	general transcription factor IIF subunit 2
23505	0.17257	3680.4	0.081998	2.1046	0.035326	0.51925	TMEM131	transmembrane protein 131
8507	0.33469	1339	0.15906	2.1041	0.035365	0.51925	ENC1	ectodermal-neural cortex 1
81890	0.33307	1104.1	0.15831	2.1039	0.035384	0.51925	QTRT1	queuine tRNA-ribosyltransferase catalytic subunit 1
3162	-0.11369	40141	0.054057	-2.1032	0.035445	0.51925	HMOX1	heme oxygenase 1
284352	-0.267	2862	0.12695	-2.1032	0.035448	0.51925	PPP1R37	protein phosphatase 1 regulatory subunit 37
2801	0.15484	5889.3	0.073625	2.1031	0.035456	0.51925	GOLGA2	golgin A2
90865	0.26699	1745	0.12698	2.1026	0.035501	0.51933	IL33	interleukin 33
8455	0.17621	4661.9	0.083921	2.0998	0.035749	0.52129	ATRN	attractin
55669	0.25147	1724.4	0.11983	2.0986	0.035852	0.52129	MFN1	mitofusin 1
55512	5.1653	6.415	2.4614	2.0985	0.035858	0.52129	SMPD3	sphingomyelin phosphodiesterase 3
3604	-0.74316	174.76	0.35418	-2.0982	0.035885	0.52129	TNFRSF9	TNF receptor superfamily member 9
31	0.24213	2593.2	0.11547	2.0969	0.036002	0.52129	ACACA	acetyl-CoA carboxylase alpha
92949	0.28164	1645.4	0.13433	2.0967	0.036018	0.52129	ADAMTSL1	ADAMTS like 1
7764	0.22708	2996	0.10831	2.0967	0.036021	0.52129	ZNF217	zinc finger protein 217
6513	-0.21135	2769.2	0.10081	-2.0965	0.036034	0.52129	SLC2A1	solute carrier family 2 member 1
101928521	-4.8136	9.1503	2.2963	-2.0963	0.036059	0.52129	PDE6B-AS1	PDE6B antisense RNA 1
1213	0.12044	25094	0.057462	2.0959	0.03609	0.52129	CLTC	clathrin heavy chain
51540	0.36429	768.81	0.17385	2.0954	0.036132	0.52129	SCLY	selenocysteine lyase
80206	3.0315	30.393	1.4468	2.0953	0.03614	0.52129	FHOD3	formin homology 2 domain containing 3
8161	0.35357	818.56	0.16877	2.095	0.036169	0.52129	COIL	coilin
5824	0.25806	1942.9	0.12318	2.0949	0.036181	0.52129	PEX19	peroxisomal biogenesis factor 19
2065	6.279	4.7021	2.9984	2.0941	0.036252	0.52161	ERBB3	erb-b2 receptor tyrosine kinase 3
79943	0.42451	568.92	0.20276	2.0936	0.036293	0.52161	ZNF696	zinc finger protein 696
7461	-0.19527	3554.1	0.093282	-2.0933	0.036321	0.52161	CLIP2	CAP-Gly domain containing linker protein 2
3845	0.23124	2102.8	0.11057	2.0914	0.03649	0.52308	KRAS	"KRAS proto-oncogene, GTPase"
28996	0.16909	6460.1	0.080852	2.0913	0.036501	0.52308	HIPK2	homeodomain interacting protein kinase 2
9647	0.14307	7917.6	0.068444	2.0903	0.036595	0.52386	PPM1F	"protein phosphatase, Mg2+/Mn2+ dependent 1F"
84439	0.78716	201.43	0.3768	2.0891	0.036702	0.52479	HHIPL1	HHIP like 1
60678	-0.4574	521.75	0.21901	-2.0885	0.036757	0.52479	EEFSEC	"eukaryotic elongation factor, selenocysteine-tRNA specific"
64429	0.25125	1922.4	0.12038	2.0871	0.036877	0.52479	ZDHHC6	zinc finger DHHC-type palmitoyltransferase 6
163175	-6.7062	5.8286	3.2137	-2.0867	0.036914	0.52479	LGI4	leucine rich repeat LGI family member 4
7342	-0.18812	4731.2	0.090178	-2.0861	0.036968	0.52479	UBP1	upstream binding protein 1
51635	-0.22318	2526	0.10701	-2.0857	0.037007	0.52479	DHRS7	dehydrogenase/reductase 7
5725	-0.11324	12239	0.054303	-2.0853	0.037044	0.52479	PTBP1	polypyrimidine tract binding protein 1
79969	0.40895	594.92	0.19612	2.0852	0.03705	0.52479	ATAT1	alpha tubulin acetyltransferase 1
55337	-0.22812	2914.3	0.10941	-2.085	0.037073	0.52479	SHFL	shiftless antiviral inhibitor of ribosomal frameshifting
7071	-0.15773	4946	0.075652	-2.0849	0.037078	0.52479	KLF10	Kruppel like factor 10
56911	0.53602	426.36	0.25714	2.0845	0.037113	0.52479	MAP3K7CL	MAP3K7 C-terminal like
23033	0.27504	1695.7	0.13198	2.0839	0.037165	0.52479	DOP1A	DOP1 leucine zipper like protein A
55103	0.33557	1322.3	0.16103	2.0838	0.037174	0.52479	RALGPS2	Ral GEF with PH domain and SH3 binding motif 2
57554	-3.8983	9.5459	1.8711	-2.0835	0.03721	0.52479	LRRC7	leucine rich repeat containing 7
4926	0.15295	13677	0.0735	2.0809	0.03744	0.52747	NUMA1	nuclear mitotic apparatus protein 1
56674	-0.22849	2399.4	0.10992	-2.0786	0.03765	0.52988	TMEM9B	TMEM9 domain family member B
2879	-0.1508	10908	0.072636	-2.076	0.03789	0.53269	GPX4	glutathione peroxidase 4
9173	-0.22411	3146.3	0.10797	-2.0756	0.037934	0.53275	IL1RL1	interleukin 1 receptor like 1
25794	1.62	36.25	0.78124	2.0736	0.038116	0.53474	FSCN2	"fascin actin-bundling protein 2, retinal"
27327	0.15711	5128.7	0.075797	2.0728	0.038188	0.53497	TNRC6A	trinucleotide repeat containing adaptor 6A
144097	-0.29053	1423.2	0.14019	-2.0724	0.03823	0.53497	SPINDOC	spindlin interactor and repressor of chromatin binding
56915	-0.57841	334.83	0.27914	-2.0721	0.038252	0.53497	EXOSC5	exosome component 5
23165	0.20616	2720.8	0.099561	2.0707	0.038389	0.53556	NUP205	nucleoporin 205
10497	0.17179	3873.9	0.082984	2.0701	0.038441	0.53556	UNC13B	unc-13 homolog B
79856	2.2783	17.969	1.1007	2.0699	0.03846	0.53556	SNX22	sorting nexin 22
27173	-0.17439	3561.8	0.08425	-2.0699	0.038461	0.53556	SLC39A1	solute carrier family 39 member 1
83985	-0.30744	3332.1	0.14855	-2.0695	0.038495	0.53556	SPNS1	sphingolipid transporter 1 (putative)
5217	0.1862	3645	0.090011	2.0687	0.038576	0.53613	PFN2	profilin 2
9931	0.21472	3542.8	0.10383	2.068	0.038638	0.53644	HELZ	helicase with zinc finger
10025	-0.22082	2479.5	0.10682	-2.0671	0.038721	0.53702	MED16	mediator complex subunit 16
9401	-0.90455	141.97	0.4379	-2.0657	0.038861	0.53841	RECQL4	RecQ like helicase 4
1810	-0.23647	2413.5	0.1145	-2.0652	0.038907	0.53849	DR1	down-regulator of transcription 1
1117	5.6084	8.0446	2.7164	2.0647	0.038953	0.53857	CHI3L2	chitinase 3 like 2
55102	0.21123	2505.7	0.10234	2.064	0.039017	0.53889	ATG2B	autophagy related 2B
829	0.14518	6010.4	0.070425	2.0615	0.039259	0.5402	CAPZA1	capping actin protein of muscle Z-line subunit alpha 1
79634	-0.42227	676.28	0.20493	-2.0605	0.03935	0.5402	SCRN3	secernin 3
388610	-0.25193	2321.3	0.12228	-2.0603	0.039369	0.5402	TRNP1	TMF1 regulated nuclear protein 1
148327	0.69709	259.69	0.33841	2.0599	0.039406	0.5402	CREB3L4	cAMP responsive element binding protein 3 like 4
388512	6.2947	4.641	3.0562	2.0596	0.039433	0.5402	CLEC17A	C-type lectin domain containing 17A
85440	-0.28833	1730.1	0.14001	-2.0593	0.039465	0.5402	DOCK7	dedicator of cytokinesis 7
414149	1.3514	48.592	0.65636	2.0589	0.039505	0.5402	ACBD7	acyl-CoA binding domain containing 7
404217	-0.3431	1195.7	0.16666	-2.0587	0.039525	0.5402	CTXN1	cortexin 1
85477	-3.8463	12.684	1.8684	-2.0587	0.039528	0.5402	SCIN	scinderin
990	-0.96539	106.36	0.46897	-2.0585	0.039541	0.5402	CDC6	cell division cycle 6
25875	0.29391	1388	0.14279	2.0584	0.039556	0.5402	LETMD1	LETM1 domain containing 1
57325	0.47461	572.57	0.23071	2.0572	0.039672	0.54045	KAT14	lysine acetyltransferase 14
7448	-6.0818	5.3594	2.9567	-2.057	0.03969	0.54045	VTN	vitronectin
9588	-0.17176	5352.7	0.083512	-2.0567	0.039713	0.54045	PRDX6	peroxiredoxin 6
23423	-0.19375	3752.6	0.094215	-2.0565	0.039736	0.54045	TMED3	transmembrane p24 trafficking protein 3
79884	-2.7758	16.26	1.3511	-2.0545	0.039927	0.54197	MAP9	microtubule associated protein 9
4644	0.12594	10406	0.061305	2.0543	0.039942	0.54197	MYO5A	myosin VA
727897	5.8207	6.3651	2.8345	2.0535	0.040021	0.54197	MUC5B	"mucin 5B, oligomeric mucus/gel-forming"
84456	0.21681	2642.7	0.1056	2.0532	0.040056	0.54197	L3MBTL3	L3MBTL histone methyl-lysine binding protein 3
85359	-0.32832	1011.5	0.16	-2.052	0.040173	0.54197	DGCR6L	DiGeorge syndrome critical region gene 6 like
79966	-0.19239	3204.5	0.093759	-2.0519	0.040175	0.54197	SCD5	stearoyl-CoA desaturase 5
55789	5.8384	6.2038	2.8457	2.0516	0.040204	0.54197	DEPDC1B	DEP domain containing 1B
4783	-0.33108	1032.4	0.16137	-2.0516	0.040204	0.54197	NFIL3	"nuclear factor, interleukin 3 regulated"
10527	0.12929	8816.7	0.063019	2.0515	0.040213	0.54197	IPO7	importin 7
374920	-0.36156	1156.4	0.1763	-2.0508	0.040283	0.54235	ZSWIM9	zinc finger SWIM-type containing 9
7027	0.20899	3195.4	0.10195	2.05	0.040368	0.54291	TFDP1	transcription factor Dp-1
84220	0.23862	2193.3	0.11649	2.0483	0.040529	0.54291	RGPD5	RANBP2 like and GRIP domain containing 5
84239	-5.817	7.5427	2.8401	-2.0482	0.040545	0.54291	ATP13A4	ATPase 13A4
284451	-6.332	7.0473	3.0918	-2.048	0.040562	0.54291	ODF3L2	outer dense fiber of sperm tails 3 like 2
56413	0.45064	502.99	0.22005	2.0479	0.040567	0.54291	LTB4R2	leukotriene B4 receptor 2
84752	-0.39511	756.46	0.19293	-2.0479	0.040568	0.54291	B3GNT9	"UDP-GlcNAc:betaGal beta-1,3-N-acetylglucosaminyltransferase 9"
197335	0.3299	1354.6	0.16114	2.0473	0.040633	0.54299	WDR90	WD repeat domain 90
83638	-0.24872	2437.1	0.1215	-2.047	0.040655	0.54299	C11orf68	chromosome 11 open reading frame 68
51073	-0.2649	1459.4	0.12948	-2.0459	0.040765	0.54301	MRPL4	mitochondrial ribosomal protein L4
2621	-0.16358	7046.9	0.079955	-2.0458	0.040772	0.54301	GAS6	growth arrest specific 6
1294	0.6677	220.15	0.32638	2.0458	0.040779	0.54301	COL7A1	collagen type VII alpha 1 chain
284359	1.8082	34.308	0.8843	2.0448	0.040878	0.54327	IZUMO1	izumo sperm-egg fusion 1
51715	-0.33135	1119.8	0.16205	-2.0447	0.04088	0.54327	RAB23	"RAB23, member RAS oncogene family"
6818	0.77015	192.73	0.37709	2.0423	0.041117	0.54583	SULT1A3	sulfotransferase family 1A member 3
4646	0.15416	6564	0.075499	2.0418	0.041169	0.54583	MYO6	myosin VI
2101	-0.23532	2164.1	0.11526	-2.0416	0.041195	0.54583	ESRRA	estrogen related receptor alpha
7041	-0.19474	2700.7	0.095442	-2.0405	0.041304	0.54674	TGFB1I1	transforming growth factor beta 1 induced transcript 1
3705	-0.331	1265.9	0.16247	-2.0373	0.04162	0.55037	ITPK1	inositol-tetrakisphosphate 1-kinase
2217	-0.13749	9381.8	0.06755	-2.0353	0.041816	0.55236	FCGRT	Fc fragment of IgG receptor and transporter
83719	0.285	1400.4	0.14005	2.035	0.041853	0.55236	YPEL3	yippee like 3
3159	-0.11442	31265	0.056243	-2.0345	0.041906	0.55251	HMGA1	high mobility group AT-hook 1
10533	-0.29205	1727.8	0.14363	-2.0333	0.042023	0.55351	ATG7	autophagy related 7
7538	-0.41401	566.65	0.2037	-2.0325	0.042108	0.55408	ZFP36	ZFP36 ring finger protein
65062	-0.46452	919.47	0.22883	-2.03	0.042355	0.55651	TMEM237	transmembrane protein 237
5566	0.17529	5248.6	0.086357	2.0298	0.042376	0.55651	PRKACA	protein kinase cAMP-activated catalytic subunit alpha
84162	0.18515	4243.4	0.091287	2.0282	0.04254	0.55748	KIAA1109	KIAA1109
355	0.29857	1194.7	0.14723	2.0279	0.042572	0.55748	FAS	Fas cell surface death receptor
10111	0.21357	2730.7	0.10532	2.0279	0.042575	0.55748	RAD50	RAD50 double strand break repair protein
285600	1.2657	65.565	0.62459	2.0265	0.042711	0.55835	KIAA0825	KIAA0825
60674	0.19385	4562.3	0.095662	2.0264	0.042725	0.55835	GAS5	growth arrest specific 5
22981	0.35758	1055.2	0.1765	2.0259	0.042777	0.55848	NINL	ninein like
25897	0.17498	4330.4	0.086491	2.0231	0.043064	0.56168	RNF19A	"ring finger protein 19A, RBR E3 ubiquitin protein ligase"
23657	0.12244	32107	0.060566	2.0216	0.043222	0.56292	SLC7A11	solute carrier family 7 member 11
8406	-0.10658	14727	0.052727	-2.0213	0.043248	0.56292	SRPX	sushi repeat containing protein X-linked
5230	-0.12965	12462	0.064153	-2.0209	0.043285	0.56292	PGK1	phosphoglycerate kinase 1
78991	0.33555	1337	0.16615	2.0196	0.043421	0.56413	PCYOX1L	prenylcysteine oxidase 1 like
54997	-5.7477	5.9245	2.8485	-2.0178	0.043611	0.56569	TESC	tescalcin
30812	-1.5734	39.298	0.77979	-2.0177	0.043625	0.56569	SOX8	SRY-box transcription factor 8
4131	0.13282	24272	0.065883	2.016	0.043805	0.56746	MAP1B	microtubule associated protein 1B
84273	-0.30654	1141	0.15223	-2.0137	0.04404	0.56747	NOA1	nitric oxide associated 1
81621	-2.4839	20.6	1.2336	-2.0136	0.044053	0.56747	KAZALD1	Kazal type serine peptidase inhibitor domain 1
123041	-6.0881	4.9821	3.0238	-2.0134	0.044071	0.56747	SLC24A4	solute carrier family 24 member 4
56894	-0.15042	5187.2	0.074742	-2.0125	0.044165	0.56747	AGPAT3	1-acylglycerol-3-phosphate O-acyltransferase 3
1500	0.10568	17602	0.052517	2.0123	0.044187	0.56747	CTNND1	catenin delta 1
79088	0.28859	1078.3	0.14341	2.0123	0.04419	0.56747	ZNF426	zinc finger protein 426
388115	0.16887	4791.9	0.083929	2.0121	0.044209	0.56747	CCDC9B	coiled-coil domain containing 9B
85364	-0.39254	801.85	0.19511	-2.0119	0.044232	0.56747	ZCCHC3	zinc finger CCHC-type containing 3
7701	0.21948	2556.8	0.1091	2.0118	0.044242	0.56747	ZNF142	zinc finger protein 142
6708	0.76104	208.67	0.37843	2.0111	0.044319	0.56747	SPTA1	"spectrin alpha, erythrocytic 1"
4539	-0.13666	59841	0.067973	-2.0105	0.044378	0.56747	MT-ND4L	mitochondrially encoded NADH 4L dehydrogenase
56267	0.30532	1016.3	0.15187	2.0104	0.044385	0.56747	KYAT3	kynurenine aminotransferase 3
54606	0.21334	2706.2	0.10613	2.0102	0.044411	0.56747	DDX56	DEAD-box helicase 56
91316	0.24747	1635.6	0.12314	2.0096	0.044476	0.56747	GUSBP11	GUSB pseudogene 11
1849	-0.40601	1020.9	0.20205	-2.0094	0.044492	0.56747	DUSP7	dual specificity phosphatase 7
55092	-0.39477	759.59	0.19649	-2.0092	0.044519	0.56747	TMEM51	transmembrane protein 51
222229	-0.3128	992.19	0.15571	-2.0089	0.044551	0.56747	LRWD1	leucine rich repeats and WD repeat domain containing 1
91409	1.3083	57.443	0.65131	2.0087	0.04457	0.56747	CCDC74B	coiled-coil domain containing 74B
4282	-0.19196	6886.6	0.095595	-2.008	0.044641	0.56783	MIF	macrophage migration inhibitory factor
129293	1.9158	26.574	0.95446	2.0072	0.044732	0.56845	TRABD2A	TraB domain containing 2A
81796	-5.9968	4.5352	2.9885	-2.0066	0.044792	0.56867	SLCO5A1	solute carrier organic anion transporter family member 5A1
222967	-5.3262	5.0119	2.6552	-2.0059	0.044862	0.56902	RSPH10B	radial spoke head 10 homolog B
79143	-0.18423	10654	0.091895	-2.0048	0.044989	0.57009	MBOAT7	membrane bound O-acyltransferase domain containing 7
6625	0.15249	15179	0.076118	2.0033	0.045147	0.5702	SNRNP70	small nuclear ribonucleoprotein U1 subunit 70
57716	0.65209	287.86	0.32554	2.0031	0.045164	0.5702	PRX	periaxin
2634	-0.18486	3872.8	0.09229	-2.003	0.045174	0.5702	GBP2	guanylate binding protein 2
4499	-5.0752	6.6114	2.5341	-2.0028	0.045201	0.5702	MT1M	metallothionein 1M
101930100	5.9134	5.6223	2.9527	2.0027	0.045211	0.5702	LOC101930100	uncharacterized LOC101930100
973	-6.0368	5.2511	3.0155	-2.0019	0.045294	0.57071	CD79A	CD79a molecule
284565	0.2033	3007.8	0.10159	2.0011	0.045378	0.57077	NBPF15	NBPF member 15
8411	0.1953	4171.8	0.097597	2.0011	0.045384	0.57077	EEA1	early endosome antigen 1
27291	-0.30773	992.94	0.15384	-2.0003	0.045464	0.57123	R3HCC1L	R3H domain and coiled-coil containing 1 like
2615	-0.19795	4434.9	0.098991	-1.9997	0.045533	0.57155	LRRC32	leucine rich repeat containing 32
54916	0.31286	1072.4	0.15655	1.9985	0.045662	0.57155	TMEM260	transmembrane protein 260
145389	0.31102	981.17	0.15564	1.9984	0.045674	0.57155	SLC38A6	solute carrier family 38 member 6
333929	-5.3467	7.5438	2.6755	-1.9984	0.045674	0.57155	SNAI3	snail family transcriptional repressor 3
6004	5.4337	7.3353	2.72	1.9977	0.045747	0.57155	RGS16	regulator of G protein signaling 16
7272	-5.105	6.1394	2.5556	-1.9976	0.045761	0.57155	TTK	TTK protein kinase
130367	-3.3906	10.958	1.6985	-1.9962	0.045912	0.57155	SGPP2	sphingosine-1-phosphate phosphatase 2
599	0.19219	3184.8	0.096286	1.996	0.045929	0.57155	BCL2L2	BCL2 like 2
1615	0.20955	2628.5	0.10499	1.9958	0.045958	0.57155	DARS1	aspartyl-tRNA synthetase 1
83877	-0.17813	3294.8	0.089267	-1.9955	0.045986	0.57155	TM2D2	TM2 domain containing 2
5686	-0.19796	2998.5	0.099208	-1.9954	0.045999	0.57155	PSMA5	proteasome 20S subunit alpha 5
22801	-0.34018	1144.9	0.17048	-1.9954	0.046003	0.57155	ITGA11	integrin subunit alpha 11
9284	0.21987	2041.4	0.11022	1.9948	0.046062	0.57165	NPIPA1	nuclear pore complex interacting protein family member A1
51291	-0.28022	1231.3	0.1405	-1.9945	0.046096	0.57165	GMIP	GEM interacting protein
3081	2.696	19.214	1.3529	1.9928	0.046287	0.57348	HGD	"homogentisate 1,2-dioxygenase"
51466	0.25454	1648.4	0.12783	1.9913	0.046448	0.57394	EVL	Enah/Vasp-like
6130	0.10425	28816	0.052355	1.9913	0.046451	0.57394	RPL7A	ribosomal protein L7a
23113	0.20274	2859.6	0.10183	1.991	0.04648	0.57394	CUL9	cullin 9
23144	-0.29719	1222.5	0.14928	-1.9909	0.046496	0.57394	ZC3H3	zinc finger CCCH-type containing 3
7011	0.19159	3539.8	0.096362	1.9882	0.046786	0.57497	TEP1	telomerase associated protein 1
80700	-0.17115	4349.6	0.086113	-1.9875	0.046863	0.57497	UBXN6	UBX domain protein 6
83641	0.15503	4408.2	0.078006	1.9875	0.046872	0.57497	FAM107B	family with sequence similarity 107 member B
56971	0.29785	1010.3	0.14989	1.9871	0.046908	0.57497	CEACAM19	CEA cell adhesion molecule 19
56106	-1.264	157.69	0.63615	-1.987	0.046926	0.57497	PCDHGA10	"protocadherin gamma subfamily A, 10"
201633	5.9485	5.0463	2.994	1.9868	0.046944	0.57497	TIGIT	T cell immunoreceptor with Ig and ITIM domains
3241	-0.19347	4125.9	0.097378	-1.9868	0.046945	0.57497	HPCAL1	hippocalcin like 1
348262	-0.25998	2726.3	0.13089	-1.9863	0.047003	0.57497	MCRIP1	MAPK regulated corepressor interacting protein 1
57704	0.18704	2867.2	0.094175	1.9861	0.047018	0.57497	GBA2	glucosylceramidase beta 2
54941	1.7861	32.624	0.89932	1.9861	0.047024	0.57497	RNF125	ring finger protein 125
5980	0.22194	3341.7	0.11176	1.9858	0.047053	0.57497	REV3L	"REV3 like, DNA directed polymerase zeta catalytic subunit"
9525	-0.17832	3258	0.089824	-1.9852	0.047118	0.575	VPS4B	vacuolar protein sorting 4 homolog B
5832	-0.18166	2826.1	0.091516	-1.985	0.047141	0.575	ALDH18A1	aldehyde dehydrogenase 18 family member A1
126208	-0.28834	1389.4	0.14534	-1.9839	0.047264	0.57551	ZNF787	zinc finger protein 787
3669	-0.36751	926.99	0.18528	-1.9835	0.047309	0.57551	ISG20	interferon stimulated exonuclease gene 20
2941	0.47489	431.8	0.23947	1.9831	0.047358	0.57551	GSTA4	glutathione S-transferase alpha 4
2771	-0.13293	49191	0.067048	-1.9826	0.047415	0.57551	GNAI2	G protein subunit alpha i2
139065	2.1467	21.903	1.0829	1.9824	0.047434	0.57551	SLITRK4	SLIT and NTRK like family member 4
5573	0.11349	13915	0.057251	1.9823	0.047442	0.57551	PRKAR1A	protein kinase cAMP-dependent type I regulatory subunit alpha
51119	-0.17095	3744.5	0.086262	-1.9817	0.047509	0.5758	SBDS	SBDS ribosome maturation factor
144535	0.24667	2045.1	0.12453	1.9808	0.047617	0.57659	CFAP54	cilia and flagella associated protein 54
51429	-0.15812	5607.7	0.079846	-1.9803	0.047666	0.57666	SNX9	sorting nexin 9
7423	-0.19177	2713.5	0.097073	-1.9755	0.048208	0.58268	VEGFB	vascular endothelial growth factor B
112479	0.49631	377.72	0.25135	1.9746	0.048314	0.58281	ERI2	ERI1 exoribonuclease family member 2
80830	-0.21599	2264	0.10942	-1.9739	0.048391	0.58281	APOL6	apolipoprotein L6
3911	0.12075	12628	0.061189	1.9734	0.048445	0.58281	LAMA5	laminin subunit alpha 5
57730	0.40628	617.21	0.20592	1.973	0.048495	0.58281	ANKRD36B	ankyrin repeat domain 36B
4035	0.36002	735.44	0.18248	1.9729	0.048507	0.58281	LRP1	LDL receptor related protein 1
149603	-0.18481	5289.7	0.093679	-1.9728	0.048519	0.58281	RNF187	ring finger protein 187
10332	-5.647	5.7654	2.8644	-1.9714	0.048673	0.58281	CLEC4M	C-type lectin domain family 4 member M
5744	-0.92029	136.66	0.46682	-1.9714	0.04868	0.58281	PTHLH	parathyroid hormone like hormone
7106	-0.16546	4136.9	0.083943	-1.9711	0.048708	0.58281	TSPAN4	tetraspanin 4
5831	-0.30428	1402	0.15438	-1.971	0.048726	0.58281	PYCR1	pyrroline-5-carboxylate reductase 1
5431	-0.13534	6751.8	0.068667	-1.9709	0.048735	0.58281	POLR2B	RNA polymerase II subunit B
83552	6.758	29.468	3.429	1.9708	0.048742	0.58281	MFRP	membrane frizzled-related protein
25920	-0.17144	3737.6	0.087015	-1.9702	0.048811	0.58293	NELFB	negative elongation factor complex member B
55384	0.2536	1396.8	0.12878	1.9693	0.048921	0.58293	MEG3	maternally expressed 3
56339	0.26447	1335.2	0.13431	1.9691	0.048937	0.58293	METTL3	methyltransferase like 3
9601	-0.14863	7292.8	0.075497	-1.9687	0.048983	0.58293	PDIA4	protein disulfide isomerase family A member 4
83715	1.2084	71.478	0.61392	1.9683	0.049028	0.58293	ESPN	espin
26190	0.18228	4714.3	0.092616	1.9681	0.049053	0.58293	FBXW2	F-box and WD repeat domain containing 2
83604	0.21332	2492.7	0.1084	1.9678	0.049087	0.58293	TMEM47	transmembrane protein 47
57552	0.24065	1722	0.12235	1.9669	0.04919	0.58293	NCEH1	neutral cholesterol ester hydrolase 1
9487	0.34891	716.8	0.1774	1.9668	0.049203	0.58293	PIGL	phosphatidylinositol glycan anchor biosynthesis class L
257364	-0.2268	2283.9	0.11533	-1.9666	0.049232	0.58293	SNX33	sorting nexin 33
23331	0.22312	3156.8	0.11346	1.9666	0.049232	0.58293	TTC28	tetratricopeptide repeat domain 28
9869	0.27509	1493.2	0.13995	1.9656	0.049349	0.58356	SETDB1	SET domain bifurcated histone lysine methyltransferase 1
51186	-0.19858	4083.3	0.10105	-1.9652	0.049395	0.58356	TCEAL9	transcription elongation factor A like 9
440345	0.1545	4686.2	0.078648	1.9644	0.049479	0.58356	NPIPB4	nuclear pore complex interacting protein family member B4
84002	-0.22867	2665.6	0.11641	-1.9643	0.049497	0.58356	B3GNT5	"UDP-GlcNAc:betaGal beta-1,3-N-acetylglucosaminyltransferase 5"
54943	-1.048	82.864	0.5337	-1.9636	0.04958	0.58356	DNAJC28	DnaJ heat shock protein family (Hsp40) member C28
6328	-5.485	7.7583	2.794	-1.9632	0.049628	0.58356	SCN3A	sodium voltage-gated channel alpha subunit 3
55876	0.35007	942.98	0.17833	1.9631	0.049639	0.58356	GSDMB	gasdermin B
825	0.62146	285.52	0.31665	1.9626	0.049696	0.58356	CAPN3	calpain 3
84279	-0.60063	362.1	0.30616	-1.9618	0.049784	0.58356	PRADC1	protease associated domain containing 1
54842	-0.32744	813.28	0.16694	-1.9614	0.049827	0.58356	MFSD6	major facilitator superfamily domain containing 6
4636	0.49907	411.19	0.25445	1.9614	0.049837	0.58356	MYL5	myosin light chain 5
196403	-0.30864	1156.5	0.15737	-1.9612	0.049858	0.58356	DTX3	deltex E3 ubiquitin ligase 3
3910	0.094672	34859	0.048279	1.9609	0.049888	0.58356	LAMA4	laminin subunit alpha 4
25907	-0.63199	319.67	0.3223	-1.9608	0.049897	0.58356	TMEM158	transmembrane protein 158 (gene/pseudogene)
7544	-0.36785	688.05	0.18766	-1.9602	0.049978	0.58399	ZFY	zinc finger protein Y-linked
9787	-2.4572	21.861	1.2542	-1.9592	0.050086	0.58474	DLGAP5	DLG associated protein 5
201255	-0.36548	697.26	0.18662	-1.9584	0.050178	0.58531	LRRC45	leucine rich repeat containing 45
4982	-6.3319	4.9561	3.2342	-1.9578	0.050252	0.58549	TNFRSF11B	TNF receptor superfamily member 11b
11066	0.42066	656.81	0.21491	1.9574	0.050304	0.58549	SNRNP35	small nuclear ribonucleoprotein U11/U12 subunit 35
3913	0.10731	21491	0.054829	1.9572	0.050325	0.58549	LAMB2	laminin subunit beta 2
440603	-2.7247	17	1.3934	-1.9555	0.05053	0.58594	BCL2L15	BCL2 like 15
26512	-0.25821	1367.4	0.13205	-1.9554	0.050533	0.58594	INTS6	integrator complex subunit 6
5581	-0.27233	1412.8	0.13929	-1.9551	0.050566	0.58594	PRKCE	protein kinase C epsilon
25806	-2.4398	23.47	1.2479	-1.9551	0.050577	0.58594	VAX2	ventral anterior homeobox 2
51004	0.35389	781.61	0.18104	1.9548	0.050604	0.58594	COQ6	"coenzyme Q6, monooxygenase"
10899	-0.18815	2601.5	0.096258	-1.9546	0.050627	0.58594	JTB	jumping translocation breakpoint
57536	0.71332	186.69	0.36514	1.9536	0.050752	0.58657	KIAA1328	KIAA1328
8906	0.3193	947.59	0.16346	1.9534	0.050769	0.58657	AP1G2	adaptor related protein complex 1 subunit gamma 2
3716	0.096065	29142	0.049205	1.9524	0.050897	0.58753	JAK1	Janus kinase 1
55749	0.17201	3790.3	0.088134	1.9517	0.050977	0.58795	CCAR1	cell division cycle and apoptosis regulator 1
51282	-0.30469	1450	0.15625	-1.95	0.051175	0.58898	SCAND1	SCAN domain containing 1
64780	0.202	2942.7	0.1036	1.9499	0.051192	0.58898	MICAL1	"microtubule associated monooxygenase, calponin and LIM domain containing 1"
124944	0.69691	433.8	0.3576	1.9489	0.051313	0.58898	C17orf49	chromosome 17 open reading frame 49
112939	-0.16446	6064.4	0.084387	-1.9488	0.051318	0.58898	NACC1	nucleus accumbens associated 1
113278	5.841	5.2125	2.9976	1.9486	0.051346	0.58898	SLC52A3	solute carrier family 52 member 3
3268	-0.21494	2434.7	0.11032	-1.9483	0.051374	0.58898	AGFG2	ArfGAP with FG repeats 2
729540	0.22834	2168.8	0.1172	1.9483	0.051378	0.58898	RGPD6	RANBP2 like and GRIP domain containing 6
51337	-0.38976	754.32	0.20011	-1.9478	0.051443	0.58898	THEM6	thioesterase superfamily member 6
85474	-1.1639	63.238	0.59769	-1.9473	0.051496	0.58898	LBX2	ladybird homeobox 2
26094	0.40557	666.46	0.20834	1.9467	0.051574	0.58898	DCAF4	DDB1 and CUL4 associated factor 4
3382	0.26862	1563.1	0.13799	1.9467	0.051575	0.58898	ICA1	islet cell autoantigen 1
11274	-0.24386	1469.3	0.12528	-1.9465	0.051595	0.58898	USP18	ubiquitin specific peptidase 18
10412	0.22157	2566.8	0.11394	1.9447	0.051809	0.59092	NSA2	NSA2 ribosome biogenesis factor
55706	-0.40619	552.93	0.20904	-1.9432	0.051998	0.59183	NDC1	NDC1 transmembrane nucleoporin
4683	-0.21923	2118.7	0.11283	-1.9431	0.052009	0.59183	NBN	nibrin
57187	0.16331	3557.5	0.08405	1.943	0.052022	0.59183	THOC2	THO complex 2
63979	0.38558	592.74	0.19851	1.9424	0.052087	0.59207	FIGNL1	fidgetin like 1
8794	0.20074	2725.8	0.10338	1.9418	0.052157	0.59235	TNFRSF10C	TNF receptor superfamily member 10c
9830	-0.2631	2305.9	0.13562	-1.9399	0.052389	0.59347	TRIM14	tripartite motif containing 14
1153	0.13885	7620.5	0.071589	1.9396	0.052429	0.59347	CIRBP	cold inducible RNA binding protein
10174	-0.18373	3575.9	0.094728	-1.9395	0.052438	0.59347	SORBS3	sorbin and SH3 domain containing 3
79932	0.15527	3916	0.080098	1.9385	0.052565	0.59347	KIAA0319L	KIAA0319 like
3768	-1.1072	76.581	0.57118	-1.9384	0.052575	0.59347	KCNJ12	potassium inwardly rectifying channel subfamily J member 12
224	0.18224	3382.1	0.094022	1.9383	0.052587	0.59347	ALDH3A2	aldehyde dehydrogenase 3 family member A2
83650	2.3879	19.429	1.232	1.9383	0.052592	0.59347	SLC35G5	solute carrier family 35 member G5
9578	0.134	13473	0.069141	1.9381	0.052611	0.59347	CDC42BPB	CDC42 binding protein kinase beta
23513	0.17745	6544.1	0.091602	1.9372	0.052722	0.59417	SCRIB	scribble planar cell polarity protein
5287	-0.20358	2361.8	0.10511	-1.9369	0.052761	0.59417	PIK3C2B	phosphatidylinositol-4-phosphate 3-kinase catalytic subunit type 2 beta
2122	0.23933	2199.2	0.12364	1.9357	0.052904	0.59457	MECOM	MDS1 and EVI1 complex locus
8148	0.15753	9712.8	0.081392	1.9354	0.05294	0.59457	TAF15	TATA-box binding protein associated factor 15
80351	0.17294	4047.1	0.08938	1.9349	0.053006	0.59457	TNKS2	tankyrase 2
57665	-0.35242	638.64	0.18219	-1.9344	0.053068	0.59457	RDH14	retinol dehydrogenase 14
5465	0.29292	1062	0.15143	1.9344	0.053068	0.59457	PPARA	peroxisome proliferator activated receptor alpha
664	-0.16792	5075	0.086841	-1.9337	0.053154	0.59457	BNIP3	BCL2 interacting protein 3
1267	-0.1328	5948.5	0.06868	-1.9336	0.053165	0.59457	CNP	"2',3'-cyclic nucleotide 3' phosphodiesterase"
4237	-0.17313	3389.5	0.089538	-1.9336	0.053168	0.59457	MFAP2	microfibril associated protein 2
22889	0.17847	3024.3	0.092322	1.9332	0.053216	0.59457	KHDC4	"KH domain containing 4, pre-mRNA splicing factor"
30845	0.62711	276.04	0.32443	1.9329	0.053243	0.59457	EHD3	EH domain containing 3
29803	-0.1565	4108.3	0.081023	-1.9316	0.053409	0.59557	REPIN1	replication initiator 1
131890	5.6383	5.4217	2.9195	1.9313	0.053451	0.59557	GRK7	G protein-coupled receptor kinase 7
10975	-0.21182	3031.4	0.10968	-1.9311	0.053466	0.59557	UQCR11	"ubiquinol-cytochrome c reductase, complex III subunit XI"
26002	5.0941	7.9432	2.6389	1.9304	0.053561	0.59614	MOXD1	monooxygenase DBH like 1
55556	0.24447	2659.4	0.12668	1.9298	0.053637	0.59648	ENOSF1	enolase superfamily member 1
64319	-0.17269	6571.1	0.089527	-1.929	0.053735	0.59707	FBRS	fibrosin
170261	-6.3319	5.5585	3.2852	-1.9274	0.053932	0.59804	ZCCHC12	zinc finger CCHC-type containing 12
125206	5.6637	5.121	2.9391	1.927	0.053975	0.59804	SLC5A10	solute carrier family 5 member 10
92737	-0.15627	4650.5	0.081096	-1.927	0.053984	0.59804	DNER	delta/notch like EGF repeat containing
1415	-5.3469	6.5888	2.775	-1.9268	0.054001	0.59804	CRYBB2	crystallin beta B2
5155	-0.11693	14990	0.06074	-1.9251	0.054212	0.59959	PDGFB	platelet derived growth factor subunit B
125050	-0.70351	3755	0.36553	-1.9246	0.054275	0.59959	RN7SK	RNA component of 7SK nuclear ribonucleoprotein
5663	-0.16151	4168.5	0.083924	-1.9245	0.054297	0.59959	PSEN1	presenilin 1
658	-0.89359	160.99	0.46438	-1.9243	0.054321	0.59959	BMPR1B	bone morphogenetic protein receptor type 1B
9169	0.14806	5068.4	0.076993	1.923	0.054475	0.6001	SCAF11	SR-related CTD associated factor 11
284217	-5.8772	4.1915	3.0567	-1.9228	0.054509	0.6001	LAMA1	laminin subunit alpha 1
150864	0.48318	356.19	0.25136	1.9223	0.054569	0.6001	FAM117B	family with sequence similarity 117 member B
64748	-0.19094	2539.3	0.099333	-1.9222	0.054578	0.6001	PLPPR2	phospholipid phosphatase related 2
3274	0.59788	284.32	0.31105	1.9221	0.054591	0.6001	HRH2	histamine receptor H2
84315	-0.32583	802.93	0.16974	-1.9196	0.05491	0.60276	MON1A	"MON1 homolog A, secretory trafficking associated"
56259	-0.25312	1608.9	0.13187	-1.9195	0.054923	0.60276	CTNNBL1	catenin beta like 1
10426	0.40726	730.85	0.21228	1.9185	0.05505	0.60365	TUBGCP3	tubulin gamma complex associated protein 3
9738	0.27883	1329.8	0.14542	1.9174	0.055184	0.60463	CCP110	centriolar coiled-coil protein 110
55314	0.3528	627.43	0.18406	1.9168	0.055268	0.60505	TMEM144	transmembrane protein 144
25956	0.32987	1328	0.17227	1.9148	0.055512	0.60598	SEC31B	"SEC31 homolog B, COPII coat complex component"
100129361	-0.29308	1114.4	0.15307	-1.9146	0.05554	0.60598	SMIM10L1	small integral membrane protein 10 like 1
113	-0.37295	705.76	0.19481	-1.9144	0.05557	0.60598	ADCY7	adenylate cyclase 7
2589	-0.11264	10306	0.058839	-1.9143	0.055577	0.60598	GALNT1	polypeptide N-acetylgalactosaminyltransferase 1
55308	0.21718	1905.5	0.11345	1.9143	0.055585	0.60598	DDX19A	DEAD-box helicase 19A
154664	6.1638	4.401	3.2204	1.914	0.055626	0.60598	ABCA13	ATP binding cassette subfamily A member 13
101059953	1.2797	140.3	0.66874	1.9136	0.055671	0.60598	NPIPA8	nuclear pore complex interacting protein family member A8
79664	0.23334	1859.2	0.12198	1.913	0.055747	0.60631	ICE2	interactor of little elongation complex ELL subunit 2
100507303	-0.8459	205.01	0.4423	-1.9125	0.055809	0.60633	SNHG19	small nucleolar RNA host gene 19
22950	0.22477	1772.9	0.11754	1.9123	0.055839	0.60633	SLC4A1AP	solute carrier family 4 member 1 adaptor protein
8660	-0.39861	657.54	0.20874	-1.9096	0.056185	0.60914	IRS2	insulin receptor substrate 2
50853	0.4588	507.13	0.24027	1.9096	0.056189	0.60914	VILL	villin like
9270	-0.21519	2490.2	0.11273	-1.9088	0.05629	0.60974	ITGB1BP1	integrin subunit beta 1 binding protein 1
80344	-0.24213	1484.5	0.12694	-1.9074	0.056463	0.6107	DCAF11	DDB1 and CUL4 associated factor 11
10336	0.14823	4210.5	0.077711	1.9074	0.05647	0.6107	PCGF3	polycomb group ring finger 3
57522	0.31845	1344.3	0.16731	1.9034	0.056995	0.61587	SRGAP1	SLIT-ROBO Rho GTPase activating protein 1
27243	-0.18572	3252.6	0.097599	-1.9029	0.057058	0.61606	CHMP2A	charged multivesicular body protein 2A
25961	0.8948	104.58	0.47039	1.9022	0.05714	0.61645	NUDT13	nudix hydrolase 13
1291	-0.2596	1697.8	0.13652	-1.9015	0.057233	0.61685	COL6A1	collagen type VI alpha 1 chain
6737	-0.21926	1875.7	0.11533	-1.9012	0.05727	0.61685	TRIM21	tripartite motif containing 21
157680	0.23376	2356.7	0.12299	1.9006	0.057353	0.61725	VPS13B	vacuolar protein sorting 13 homolog B
80022	0.57113	269.87	0.30057	1.9002	0.057411	0.61737	MYO15B	myosin XVB
10439	-1.9235	21.742	1.0127	-1.8994	0.057507	0.61791	OLFM1	olfactomedin 1
11015	-0.25877	1311.4	0.13631	-1.8984	0.05764	0.61885	KDELR3	KDEL endoplasmic reticulum protein retention receptor 3
57680	0.14519	4797.7	0.076518	1.8975	0.057762	0.61958	CHD8	chromodomain helicase DNA binding protein 8
9847	0.27494	1189.7	0.14492	1.8972	0.057801	0.61958	C2CD5	C2 calcium dependent domain containing 5
91289	-0.17711	4098.9	0.09342	-1.8959	0.057975	0.62051	LMF2	lipase maturation factor 2
55122	-0.24959	1619.7	0.13165	-1.8958	0.057981	0.62051	AKIRIN2	akirin 2
8729	0.14063	6633.8	0.074198	1.8954	0.058046	0.6207	GBF1	golgi brefeldin A resistant guanine nucleotide exchange factor 1
29107	-0.44563	416.64	0.23516	-1.895	0.058098	0.62077	NXT1	nuclear transport factor 2 like export factor 1
50804	0.1892	3803.1	0.099905	1.8938	0.058256	0.62195	MYEF2	myelin expression factor 2
7322	-0.1592	4088	0.084093	-1.8931	0.058339	0.62217	UBE2D2	ubiquitin conjugating enzyme E2 D2
11122	-5.9312	4.3037	3.1335	-1.8929	0.058376	0.62217	PTPRT	protein tyrosine phosphatase receptor type T
115330	-0.80871	273.96	0.42735	-1.8924	0.058441	0.62217	GPR146	G protein-coupled receptor 146
64221	0.25096	1468.3	0.13263	1.8921	0.058471	0.62217	ROBO3	roundabout guidance receptor 3
775	5.6091	5.456	2.9657	1.8914	0.058575	0.62217	CACNA1C	calcium voltage-gated channel subunit alpha1 C
1122	-0.31841	796.01	0.16835	-1.8914	0.058576	0.62217	CHML	CHM like Rab escort protein
10536	-0.17048	5949	0.090155	-1.891	0.058625	0.62217	P3H3	prolyl 3-hydroxylase 3
2250	-0.24428	2072.9	0.12922	-1.8904	0.058704	0.62217	FGF5	fibroblast growth factor 5
284805	6.1638	4.0654	3.2624	1.8893	0.058848	0.62217	C20orf203	chromosome 20 open reading frame 203
54928	-0.1654	5136.2	0.087555	-1.8891	0.058885	0.62217	IMPAD1	inositol monophosphatase domain containing 1
875	-0.22694	1928.3	0.12014	-1.8889	0.058902	0.62217	CBS	cystathionine beta-synthase
55450	-0.25896	1809.7	0.13711	-1.8887	0.058926	0.62217	CAMK2N1	calcium/calmodulin dependent protein kinase II inhibitor 1
3321	5.9344	4.2054	3.1422	1.8886	0.05894	0.62217	IGSF3	immunoglobulin superfamily member 3
124842	-5.4989	5.3262	2.9116	-1.8886	0.058945	0.62217	TMEM132E	transmembrane protein 132E
155038	0.20878	2086.2	0.11056	1.8884	0.058975	0.62217	GIMAP8	"GTPase, IMAP family member 8"
552889	-0.19393	2939.4	0.10273	-1.8878	0.059059	0.62257	ATXN7L3B	ataxin 7 like 3B
1654	0.11475	13601	0.06082	1.8867	0.0592	0.62356	DDX3X	DEAD-box helicase 3 X-linked
6609	-0.16706	5028.6	0.088574	-1.8861	0.05928	0.62391	SMPD1	sphingomyelin phosphodiesterase 1
81704	0.89814	137.28	0.47633	1.8856	0.059355	0.62395	DOCK8	dedicator of cytokinesis 8
10202	-3.1759	9.322	1.6845	-1.8854	0.059377	0.62395	DHRS2	dehydrogenase/reductase 2
1874	-0.18944	2804.9	0.10052	-1.8846	0.059485	0.62452	E2F4	E2F transcription factor 4
3937	-6.2774	5.2895	3.3315	-1.8843	0.059525	0.62452	LCP2	lymphocyte cytosolic protein 2
7216	1.5053	41.575	0.79904	1.8839	0.059575	0.62456	TRO	trophinin
56105	-0.29642	1344.6	0.1574	-1.8832	0.059667	0.62503	PCDHGA11	"protocadherin gamma subfamily A, 11"
79074	0.31132	931.25	0.16535	1.8828	0.059722	0.62512	C2orf49	chromosome 2 open reading frame 49
57658	0.15255	5219.4	0.081165	1.8795	0.060174	0.62936	CALCOCO1	calcium binding and coiled-coil domain 1
8704	-0.20358	2417.8	0.10836	-1.8787	0.060282	0.62999	B4GALT2	"beta-1,4-galactosyltransferase 2"
79772	-0.31764	807.87	0.16918	-1.8775	0.060447	0.63122	MCTP1	multiple C2 and transmembrane domain containing 1
6992	-0.24365	1654.1	0.1299	-1.8756	0.060711	0.63348	PPP1R11	protein phosphatase 1 regulatory inhibitor subunit 11
55090	-0.37194	595.66	0.19837	-1.875	0.060799	0.63375	MED9	mediator complex subunit 9
54627	0.86346	99.332	0.46059	1.8747	0.060835	0.63375	MAP10	microtubule associated protein 10
401505	-0.27796	1159.6	0.14829	-1.8744	0.060879	0.63375	TOMM5	translocase of outer mitochondrial membrane 5
2648	0.21537	1902.8	0.11497	1.8733	0.061031	0.63457	KAT2A	lysine acetyltransferase 2A
261734	0.35553	654.05	0.18981	1.8731	0.061053	0.63457	NPHP4	nephrocystin 4
4946	-0.11112	20056	0.059349	-1.8724	0.061152	0.63472	OAZ1	ornithine decarboxylase antizyme 1
100528030	-8.9612	58.058	4.7862	-1.8723	0.061162	0.63472	POC1B-GALNT4	POC1B-GALNT4 readthrough
402	-0.25302	2645.1	0.13518	-1.8716	0.061256	0.6352	ARL2	ADP ribosylation factor like GTPase 2
5055	-0.4089	630.53	0.21854	-1.8711	0.061335	0.63552	SERPINB2	serpin family B member 2
3673	0.12442	10195	0.066512	1.8707	0.061389	0.63559	ITGA2	integrin subunit alpha 2
22985	0.11217	12119	0.059997	1.8696	0.061534	0.6366	ACIN1	apoptotic chromatin condensation inducer 1
8291	0.11534	16496	0.061734	1.8684	0.061705	0.6375	DYSF	dysferlin
169981	-0.44349	427.25	0.23738	-1.8682	0.061728	0.6375	SPIN3	spindlin family member 3
79155	-0.17185	3008.2	0.091999	-1.868	0.061765	0.6375	TNIP2	TNFAIP3 interacting protein 2
7580	0.39811	501.96	0.2133	1.8665	0.061974	0.63917	ZNF32	zinc finger protein 32
81844	0.14613	8568.3	0.078345	1.8651	0.062161	0.6406	TRIM56	tripartite motif containing 56
56006	-0.26963	1611.9	0.14465	-1.864	0.062323	0.64126	SMG9	SMG9 nonsense mediated mRNA decay factor
6594	0.18799	2750.4	0.10087	1.8638	0.062354	0.64126	SMARCA1	"SWI/SNF related, matrix associated, actin dependent regulator of chromatin, subfamily a, member 1"
1675	-1.1764	56.445	0.63124	-1.8636	0.062381	0.64126	CFD	complement factor D
9768	-2.8504	14.76	1.53	-1.863	0.062466	0.64126	PCLAF	PCNA clamp associated factor
441239	5.6151	4.233	3.0142	1.8629	0.062477	0.64126	LOC441239	uncharacterized LOC441239
144347	-0.19723	2689.6	0.10589	-1.8626	0.062513	0.64126	RFLNA	refilin A
23467	-0.67066	166.82	0.36042	-1.8608	0.062779	0.64314	NPTXR	neuronal pentraxin receptor
3978	0.1715	3580.4	0.092213	1.8598	0.062912	0.64314	LIG1	DNA ligase 1
3672	0.61206	202.35	0.3291	1.8598	0.062916	0.64314	ITGA1	integrin subunit alpha 1
114793	0.10702	8933.7	0.057546	1.8597	0.062932	0.64314	FMNL2	formin like 2
64772	0.20284	2075.5	0.10909	1.8593	0.06298	0.64314	ENGASE	endo-beta-N-acetylglucosaminidase
55599	0.39764	836.8	0.2139	1.859	0.063021	0.64314	RNPC3	"RNA binding region (RNP1, RRM) containing 3"
11321	-0.25974	1312	0.13973	-1.859	0.063033	0.64314	GPN1	GPN-loop GTPase 1
50807	0.10655	12808	0.057333	1.8584	0.063119	0.64345	ASAP1	"ArfGAP with SH3 domain, ankyrin repeat and PH domain 1"
5625	4.774	6.7908	2.5698	1.8577	0.063207	0.64345	PRODH	proline dehydrogenase 1
9044	0.21035	2408.5	0.11323	1.8577	0.063208	0.64345	BTAF1	B-TFIID TATA-box binding protein associated factor 1
55277	0.54318	274.39	0.2926	1.8564	0.063396	0.64487	FGGY	FGGY carbohydrate kinase domain containing
90353	-0.46179	421.67	0.24895	-1.8549	0.063605	0.64622	CTU1	cytosolic thiouridylase subunit 1
57728	0.24332	1560.3	0.13122	1.8543	0.0637	0.64622	WDR19	WD repeat domain 19
55367	0.18884	3894.9	0.10185	1.854	0.063742	0.64622	PIDD1	p53-induced death domain protein 1
10117	2.6181	16.237	1.4125	1.8535	0.06381	0.64622	ENAM	enamelin
29952	-0.13144	6261.5	0.070923	-1.8533	0.063841	0.64622	DPP7	dipeptidyl peptidase 7
8318	-1.3694	38.151	0.73894	-1.8532	0.063849	0.64622	CDC45	cell division cycle 45
84679	0.23172	1866.3	0.12505	1.853	0.063887	0.64622	SLC9A7	solute carrier family 9 member A7
6741	-0.14091	5227.2	0.076057	-1.8527	0.063926	0.64622	SSB	small RNA binding exonuclease protection factor La
8751	-0.12396	13080	0.06692	-1.8524	0.063964	0.64622	ADAM15	ADAM metallopeptidase domain 15
55658	-0.21134	1910.4	0.11412	-1.8519	0.064034	0.64642	RNF126	ring finger protein 126
374872	5.9484	3.7812	3.2126	1.8516	0.064081	0.64642	PEAK3	PEAK family member 3
8237	-0.25068	1388	0.13549	-1.8501	0.064294	0.64755	USP11	ubiquitin specific peptidase 11
338761	-5.1807	4.2479	2.8004	-1.85	0.064319	0.64755	C1QL4	complement C1q like 4
6773	0.11363	7984.5	0.061426	1.8498	0.064339	0.64755	STAT2	signal transducer and activator of transcription 2
5445	-0.13454	5064.3	0.072761	-1.8491	0.064448	0.64755	PON2	paraoxonase 2
56142	-1.4963	63.984	0.80924	-1.8491	0.064449	0.64755	PCDHA6	protocadherin alpha 6
1652	-0.34091	891.22	0.18443	-1.8485	0.06453	0.64755	DDT	D-dopachrome tautomerase
57509	0.141	5950.5	0.076276	1.8485	0.064532	0.64755	MTUS1	microtubule associated scaffold protein 1
26289	-1.1029	66.29	0.59678	-1.8481	0.064585	0.6476	AK5	adenylate kinase 5
1051	-0.23878	3624.6	0.12925	-1.8474	0.064693	0.64801	CEBPB	CCAAT enhancer binding protein beta
64852	0.29673	991.88	0.16064	1.8472	0.064723	0.64801	TUT1	"terminal uridylyl transferase 1, U6 snRNA-specific"
11093	0.45615	499.82	0.24701	1.8467	0.064794	0.64823	ADAMTS13	ADAM metallopeptidase with thrombospondin type 1 motif 13
51110	-0.43588	437.77	0.23613	-1.8459	0.064906	0.64875	LACTB2	lactamase beta 2
146223	0.36692	641.55	0.1988	1.8456	0.064943	0.64875	CMTM4	CKLF like MARVEL transmembrane domain containing 4
22928	-0.19692	2601.7	0.10674	-1.8449	0.065049	0.64933	SEPHS2	selenophosphate synthetase 2
399687	0.22893	2914.9	0.12413	1.8443	0.065138	0.64972	MYO18A	myosin XVIIIA
56920	-0.87596	136.88	0.47517	-1.8435	0.06526	0.65012	SEMA3G	semaphorin 3G
57106	-0.32354	856.84	0.17554	-1.8432	0.065306	0.65012	NAT14	N-acetyltransferase 14 (putative)
63892	0.26389	1154.4	0.1432	1.8428	0.065354	0.65012	THADA	THADA armadillo repeat containing
10099	-0.10474	12612	0.056841	-1.8427	0.065372	0.65012	TSPAN3	tetraspanin 3
1184	0.27258	1190.8	0.14796	1.8423	0.065427	0.65018	CLCN5	chloride voltage-gated channel 5
6683	0.28009	1160.9	0.15216	1.8408	0.065651	0.65193	SPAST	spastin
6879	-0.15331	4331.9	0.083314	-1.8401	0.065754	0.65198	TAF7	TATA-box binding protein associated factor 7
23360	0.16188	5036.1	0.087985	1.8399	0.065787	0.65198	FNBP4	formin binding protein 4
221477	0.15692	4790.5	0.085297	1.8397	0.065814	0.65198	C6orf89	chromosome 6 open reading frame 89
157567	-0.50642	463.83	0.27535	-1.8392	0.065892	0.65198	ANKRD46	ankyrin repeat domain 46
441631	0.33633	901.91	0.18291	1.8388	0.065947	0.65198	TSPAN11	tetraspanin 11
24147	-0.27588	1659.6	0.15004	-1.8388	0.06595	0.65198	FJX1	four-jointed box kinase 1
6261	6.0629	5.5862	3.298	1.8384	0.06601	0.65209	RYR1	ryanodine receptor 1
64062	0.20482	3119.5	0.11143	1.838	0.066059	0.65209	RBM26	RNA binding motif protein 26
378938	0.094629	107700	0.051512	1.837	0.066205	0.65298	MALAT1	metastasis associated lung adenocarcinoma transcript 1
154091	1.3133	47.876	0.71509	1.8365	0.066285	0.65298	SLC2A12	solute carrier family 2 member 12
220441	0.28161	1215	0.15335	1.8364	0.066304	0.65298	RNF152	ring finger protein 152
11130	-0.84598	129.61	0.46075	-1.8361	0.066344	0.65298	ZWINT	ZW10 interacting kinetochore protein
11322	0.2575	1271.3	0.14031	1.8352	0.066481	0.65327	TMC6	transmembrane channel like 6
9406	0.19148	4241.2	0.10437	1.8346	0.066558	0.65327	ZRANB2	zinc finger RANBP2-type containing 2
5797	0.13791	7624.9	0.075183	1.8344	0.066598	0.65327	PTPRM	protein tyrosine phosphatase receptor type M
5500	0.13403	5503.5	0.073088	1.8338	0.066682	0.65327	PPP1CB	protein phosphatase 1 catalytic subunit beta
23137	0.21607	2157.3	0.11783	1.8338	0.066686	0.65327	SMC5	structural maintenance of chromosomes 5
4891	-0.15273	4146.5	0.083291	-1.8336	0.066707	0.65327	SLC11A2	solute carrier family 11 member 2
54532	0.20215	2455.4	0.11025	1.8336	0.066716	0.65327	USP53	ubiquitin specific peptidase 53
81035	-0.17267	3124.7	0.094187	-1.8332	0.066768	0.6533	COLEC12	collectin subfamily member 12
5927	0.15807	4273.5	0.086253	1.8326	0.066859	0.65371	KDM5A	lysine demethylase 5A
83697	-5.1634	6.0035	2.8205	-1.8307	0.067144	0.65567	SLC4A9	solute carrier family 4 member 9
9254	-4.9677	6.5247	2.7137	-1.8306	0.067158	0.65567	CACNA2D2	calcium voltage-gated channel auxiliary subunit alpha2delta 2
2118	0.51366	364.56	0.28066	1.8301	0.067228	0.65587	ETV4	ETS variant transcription factor 4
387521	-0.16825	3879.3	0.092014	-1.8285	0.067469	0.65775	TMEM189	transmembrane protein 189
10628	-0.12122	7335.9	0.066325	-1.8277	0.067602	0.65856	TXNIP	thioredoxin interacting protein
23171	0.31498	918.9	0.17241	1.8269	0.067709	0.65913	GPD1L	glycerol-3-phosphate dehydrogenase 1 like
81550	0.34187	714.64	0.18729	1.8254	0.067945	0.66094	TDRD3	tudor domain containing 3
5178	0.70251	143	0.38506	1.8244	0.06809	0.66187	PEG3	paternally expressed 3
9807	-0.15498	3942.7	0.084979	-1.8237	0.068196	0.66242	IP6K1	inositol hexakisphosphate kinase 1
1777	-0.19003	2524.9	0.10424	-1.823	0.068306	0.66257	DNASE2	"deoxyribonuclease 2, lysosomal"
9034	-0.33564	768.71	0.18413	-1.8228	0.068334	0.66257	CCRL2	C-C motif chemokine receptor like 2
50	-0.15986	4309	0.087721	-1.8224	0.068397	0.66257	ACO2	aconitase 2
928	-0.10267	17486	0.056347	-1.8221	0.068437	0.66257	CD9	CD9 molecule
79823	-0.83154	116.63	0.45645	-1.8217	0.068493	0.66257	CAMKMT	calmodulin-lysine N-methyltransferase
58484	-5.7905	4.23	3.1787	-1.8216	0.068509	0.66257	NLRC4	NLR family CARD domain containing 4
5939	0.16788	5265.5	0.092189	1.8211	0.068595	0.66292	RBMS2	RNA binding motif single stranded interacting protein 2
60491	-0.53696	266.75	0.29507	-1.8198	0.06879	0.66432	NIF3L1	NGG1 interacting factor 3 like 1
3575	-0.30106	891.21	0.16556	-1.8185	0.06899	0.66577	IL7R	interleukin 7 receptor
132001	0.3602	582.74	0.19814	1.8179	0.069077	0.66613	TAMM41	TAM41 mitochondrial translocator assembly and maintenance homolog
114757	0.80363	132.7	0.4423	1.8169	0.069226	0.66686	CYGB	cytoglobin
51218	-0.28902	1021	0.15908	-1.8168	0.069253	0.66686	GLRX5	glutaredoxin 5
4145	5.8215	5.5515	3.2073	1.815	0.069517	0.66893	MATK	megakaryocyte-associated tyrosine kinase
1059	-0.19724	4882.6	0.10873	-1.8141	0.069666	0.66988	CENPB	centromere protein B
93343	-0.32656	1293.4	0.18006	-1.8136	0.069742	0.67013	MVB12A	multivesicular body subunit 12A
6388	-0.2006	2149.3	0.11068	-1.8125	0.069906	0.67122	SDF2	stromal cell derived factor 2
5376	-0.15197	3971.2	0.083881	-1.8117	0.070032	0.67149	PMP22	peripheral myelin protein 22
339324	0.2359	1456.5	0.13021	1.8117	0.070035	0.67149	ZNF260	zinc finger protein 260
55075	0.13893	6431	0.076716	1.811	0.070147	0.67208	UACA	uveal autoantigen with coiled-coil domains and ankyrin repeats
56123	-0.68128	180.77	0.37636	-1.8102	0.070271	0.67247	PCDHB13	protocadherin beta 13
140894	2.9513	15.922	1.6305	1.81	0.070288	0.67247	CNBD2	cyclic nucleotide binding domain containing 2
6940	0.42437	687.54	0.23451	1.8096	0.070353	0.67261	ZNF354A	zinc finger protein 354A
23461	0.2807	1364.4	0.15524	1.8081	0.070591	0.67407	ABCA5	ATP binding cassette subfamily A member 5
688	-0.72918	141.66	0.40331	-1.808	0.070607	0.67407	KLF5	Kruppel like factor 5
29070	0.56035	250.29	0.31006	1.8073	0.070721	0.67431	CCDC113	coiled-coil domain containing 113
25800	-0.2745	1089.2	0.15192	-1.8069	0.070783	0.67431	SLC39A6	solute carrier family 39 member 6
3214	-0.41295	587.84	0.22854	-1.8069	0.070783	0.67431	HOXB4	homeobox B4
9230	-0.17797	3184.4	0.098563	-1.8056	0.070979	0.67569	RAB11B	"RAB11B, member RAS oncogene family"
25898	0.34646	719.45	0.19203	1.8041	0.071208	0.67714	RCHY1	ring finger and CHY zinc finger domain containing 1
3177	5.8277	5.4857	3.2304	1.804	0.071233	0.67714	SLC29A2	solute carrier family 29 member 2
718	0.1635	4474.2	0.09067	1.8033	0.071343	0.67771	C3	complement C3
51260	-0.34828	802.94	0.19329	-1.8018	0.071573	0.67865	PBDC1	polysaccharide biosynthesis domain containing 1
7728	0.23745	1480.5	0.13179	1.8017	0.071592	0.67865	ZNF175	zinc finger protein 175
6899	-1.5675	31.709	0.86999	-1.8017	0.071594	0.67865	TBX1	T-box transcription factor 1
9874	0.17496	2935.4	0.097163	1.8007	0.071745	0.67919	TLK1	tousled like kinase 1
5469	0.19419	3509.3	0.10786	1.8004	0.071793	0.67919	MED1	mediator complex subunit 1
23370	-0.20703	2105.8	0.11499	-1.8004	0.071804	0.67919	ARHGEF18	Rho/Rac guanine nucleotide exchange factor 18
11145	-0.23136	1654.6	0.12858	-1.7993	0.071973	0.67994	PLAAT3	phospholipase A and acyltransferase 3
64784	0.21407	1830.2	0.119	1.799	0.072018	0.67994	CRTC3	CREB regulated transcription coactivator 3
5467	0.25228	1451.8	0.14026	1.7987	0.072072	0.67994	PPARD	peroxisome proliferator activated receptor delta
79682	-1.2383	52.626	0.68847	-1.7986	0.072087	0.67994	CENPU	centromere protein U
419	5.1316	6.7989	2.8538	1.7982	0.072152	0.68007	ART3	ADP-ribosyltransferase 3
9136	-0.30034	863.33	0.16711	-1.7973	0.072292	0.68091	RRP9	"ribosomal RNA processing 9, U3 small nucleolar RNA binding protein"
25959	0.19369	3363.9	0.10779	1.7969	0.072349	0.68097	KANK2	KN motif and ankyrin repeat domains 2
10477	0.26625	1358.7	0.1482	1.7965	0.072409	0.68106	UBE2E3	ubiquitin conjugating enzyme E2 E3
23399	-0.1876	3752.8	0.10448	-1.7955	0.072575	0.68189	CTDNEP1	CTD nuclear envelope phosphatase 1
400581	0.32747	688.77	0.18243	1.7951	0.072641	0.68189	GRAPL	GRB2 related adaptor protein like
66005	-0.17477	2974.8	0.097365	-1.795	0.072651	0.68189	CHID1	chitinase domain containing 1
9583	0.13835	4620	0.077091	1.7946	0.072713	0.68192	ENTPD4	ectonucleoside triphosphate diphosphohydrolase 4
9667	0.1542	4440.2	0.085935	1.7944	0.072756	0.68192	SAFB2	scaffold attachment factor B2
1933	-0.13301	6509.5	0.074161	-1.7935	0.072886	0.68237	EEF1B2	eukaryotic translation elongation factor 1 beta 2
79834	0.13104	8050.8	0.073068	1.7934	0.072907	0.68237	PEAK1	pseudopodium enriched atypical kinase 1
165140	5.6498	4.5069	3.1515	1.7928	0.073013	0.68288	OXER1	oxoeicosanoid receptor 1
51	0.1612	3463.6	0.089956	1.7919	0.073144	0.68323	ACOX1	acyl-CoA oxidase 1
84662	-0.29231	1151.9	0.16315	-1.7916	0.073191	0.68323	GLIS2	GLIS family zinc finger 2
79180	-0.18969	2414.3	0.10588	-1.7916	0.073203	0.68323	EFHD2	EF-hand domain family member D2
221395	0.081056	19761	0.04526	1.7909	0.073315	0.68377	ADGRF5	adhesion G protein-coupled receptor F5
54985	0.2924	885.54	0.1633	1.7906	0.073363	0.68377	HCFC1R1	host cell factor C1 regulator 1
115811	-1.3197	39.674	0.73735	-1.7898	0.073481	0.684	IQCD	IQ motif containing D
5796	-0.14885	4482.3	0.083173	-1.7897	0.073504	0.684	PTPRK	protein tyrosine phosphatase receptor type K
54868	-0.26457	1231.6	0.14785	-1.7894	0.073544	0.684	TMEM104	transmembrane protein 104
8225	-0.33026	755.57	0.1846	-1.7891	0.073604	0.684	GTPBP6	GTP binding protein 6 (putative)
252983	0.42277	578.71	0.23637	1.7886	0.073682	0.684	STXBP4	syntaxin binding protein 4
7090	-0.19112	2123.5	0.10686	-1.7885	0.073696	0.684	TLE3	"TLE family member 3, transcriptional corepressor"
6310	-0.21607	1680.2	0.12087	-1.7877	0.073826	0.68474	ATXN1	ataxin 1
85406	-0.21239	2182.8	0.11888	-1.7866	0.074006	0.68593	DNAJC14	DnaJ heat shock protein family (Hsp40) member C14
1366	0.253	1356.2	0.14165	1.7861	0.074077	0.68611	CLDN7	claudin 7
53947	-0.25954	1861	0.14538	-1.7852	0.074223	0.68699	A4GALT	"alpha 1,4-galactosyltransferase (P blood group)"
8476	0.12776	9632.2	0.071605	1.7843	0.07438	0.68775	CDC42BPA	CDC42 binding protein kinase alpha
79175	0.35113	635	0.19681	1.7841	0.074408	0.68775	ZNF343	zinc finger protein 343
9358	-0.23189	1587.7	0.13002	-1.7835	0.074507	0.68818	ITGBL1	integrin subunit beta like 1
155400	0.25676	1181.8	0.14402	1.7827	0.074629	0.68884	NSUN5P1	NSUN5 pseudogene 1
6948	-0.20461	2627.9	0.11482	-1.782	0.074746	0.68944	TCN2	transcobalamin 2
4297	0.13132	8171.1	0.073714	1.7814	0.074842	0.68985	KMT2A	lysine methyltransferase 2A
6738	0.18274	2508.5	0.10263	1.7806	0.074978	0.69004	RO60	"Ro60, Y RNA binding protein"
51684	-0.23557	1659.8	0.13232	-1.7803	0.075022	0.69004	SUFU	SUFU negative regulator of hedgehog signaling
57186	0.17107	4422.5	0.096127	1.7797	0.075131	0.69004	RALGAPA2	Ral GTPase activating protein catalytic subunit alpha 2
283659	0.39963	446.1	0.2247	1.7785	0.075319	0.69004	PRTG	protogenin
89845	0.22416	2235.9	0.1261	1.7776	0.075467	0.69004	ABCC10	ATP binding cassette subfamily C member 10
25855	-0.23772	1339.3	0.13373	-1.7776	0.075472	0.69004	BRMS1	BRMS1 transcriptional repressor and anoikis regulator
112806053	-1.1316	62.451	0.63669	-1.7773	0.075514	0.69004	TBILA	TGF-beta induced lncRNA
79933	4.9438	7.1649	2.7817	1.7773	0.075522	0.69004	SYNPO2L	synaptopodin 2 like
10130	-0.10718	12132	0.06031	-1.7771	0.075545	0.69004	PDIA6	protein disulfide isomerase family A member 6
1435	-0.15529	4861.7	0.087401	-1.7768	0.0756	0.69004	CSF1	colony stimulating factor 1
9903	-0.12148	8449.9	0.068397	-1.7761	0.075713	0.69004	KLHL21	kelch like family member 21
9019	-0.1144	9606.4	0.064416	-1.776	0.075728	0.69004	MPZL1	myelin protein zero like 1
10021	5.8841	4.7623	3.3131	1.776	0.075735	0.69004	HCN4	hyperpolarization activated cyclic nucleotide gated potassium channel 4
92482	0.303	738.64	0.17061	1.776	0.07574	0.69004	BBIP1	BBSome interacting protein 1
3195	-0.74814	118.7	0.42143	-1.7753	0.075856	0.69004	TLX1	T cell leukemia homeobox 1
79871	0.26128	1117.5	0.14723	1.7746	0.075969	0.69004	RPAP2	RNA polymerase II associated protein 2
54708	-0.22244	2349.9	0.12535	-1.7745	0.075972	0.69004	MARCHF5	membrane associated ring-CH-type finger 5
10001	0.32196	702.12	0.18143	1.7745	0.075973	0.69004	MED6	mediator complex subunit 6
6949	0.21376	2227.9	0.12046	1.7745	0.075975	0.69004	TCOF1	treacle ribosome biogenesis factor 1
9334	-0.099601	13048	0.056131	-1.7744	0.075994	0.69004	B4GALT5	"beta-1,4-galactosyltransferase 5"
5649	-0.37396	699.63	0.21077	-1.7742	0.07603	0.69004	RELN	reelin
283254	0.66468	199.44	0.37464	1.7742	0.076033	0.69004	HARBI1	harbinger transposase derived 1
57585	0.17541	2813.6	0.098872	1.7741	0.076051	0.69004	CRAMP1	cramped chromatin regulator homolog 1
55602	-0.33233	757.4	0.18753	-1.7722	0.076366	0.69127	CDKN2AIP	CDKN2A interacting protein
56145	4.7271	3.7712	2.6679	1.7718	0.076421	0.69127	PCDHA3	protocadherin alpha 3
100287616	-0.88456	87.485	0.4993	-1.7716	0.076461	0.69127	LOXL1-AS1	LOXL1 antisense RNA 1
5316	0.31522	741.65	0.17797	1.7712	0.076533	0.69127	PKNOX1	PBX/knotted 1 homeobox 1
55705	0.12739	6086.4	0.071929	1.7711	0.076544	0.69127	IPO9	importin 9
53358	0.38718	581.59	0.21861	1.7711	0.076548	0.69127	SHC3	SHC adaptor protein 3
83460	-0.33157	769.65	0.18722	-1.7711	0.076549	0.69127	EMC6	ER membrane protein complex subunit 6
79094	-0.31758	818.62	0.17942	-1.77	0.076723	0.69237	CHAC1	ChaC glutathione specific gamma-glutamylcyclotransferase 1
26751	0.2764	1226.7	0.15619	1.7696	0.076787	0.69248	SH3YL1	SH3 and SYLF domain containing 1
84769	-0.47892	386.19	0.27073	-1.769	0.076892	0.69258	MPV17L2	MPV17 mitochondrial inner membrane protein like 2
11247	-1.4157	40.892	0.80034	-1.7689	0.076907	0.69258	NXPH4	neurexophilin 4
55030	-0.24564	1219.8	0.13889	-1.7686	0.076963	0.69258	FBXO34	F-box protein 34
6642	0.1229	5793.4	0.069508	1.7681	0.077045	0.69258	SNX1	sorting nexin 1
63908	0.29477	1011.7	0.16672	1.768	0.077057	0.69258	NAPB	NSF attachment protein beta
389766	5.6584	3.6881	3.2011	1.7677	0.077117	0.69265	C9orf153	chromosome 9 open reading frame 153
3866	-1.3382	40.835	0.75732	-1.7671	0.077217	0.69309	KRT15	keratin 15
25864	-0.55038	285.4	0.31168	-1.7658	0.077422	0.69446	ABHD14A	abhydrolase domain containing 14A
285175	-4.9009	4.5835	2.7766	-1.7651	0.077545	0.6951	UNC80	"unc-80 homolog, NALCN channel complex subunit"
4240	-0.15089	4209.3	0.085572	-1.7633	0.07785	0.6969	MFGE8	milk fat globule-EGF factor 8 protein
9703	0.12128	13355	0.068778	1.7633	0.077851	0.6969	KIAA0100	KIAA0100
10351	0.25356	1170.5	0.14388	1.7622	0.078028	0.69801	ABCA8	ATP binding cassette subfamily A member 8
11033	-0.56313	231.42	0.3198	-1.7609	0.078257	0.69815	ADAP1	ArfGAP with dual PH domains 1
55012	0.23344	1386.6	0.13257	1.7609	0.078259	0.69815	PPP2R3C	protein phosphatase 2 regulatory subunit B''gamma
8603	0.17826	2470.3	0.10124	1.7608	0.078264	0.69815	FAM193A	family with sequence similarity 193 member A
595	0.080989	38577	0.046004	1.7605	0.078331	0.69815	CCND1	cyclin D1
56147	8.4256	19.104	4.7864	1.7603	0.07835	0.69815	PCDHA1	protocadherin alpha 1
478	-3.5219	7.3634	2.0009	-1.7602	0.078377	0.69815	ATP1A3	ATPase Na+/K+ transporting subunit alpha 3
7450	0.090003	92314	0.051138	1.76	0.078408	0.69815	VWF	von Willebrand factor
6547	-4.6449	8.4069	2.6416	-1.7584	0.078684	0.70013	SLC8A3	solute carrier family 8 member A3
11076	-1.0534	60.064	0.5992	-1.758	0.078753	0.70028	TPPP	tubulin polymerization promoting protein
339745	0.25463	1283.2	0.14489	1.7574	0.078856	0.70069	SPOPL	speckle type BTB/POZ protein like
10280	-0.218	1843.4	0.12408	-1.7569	0.078939	0.70069	SIGMAR1	sigma non-opioid intracellular receptor 1
246176	-5.8175	5.4932	3.3118	-1.7566	0.078986	0.70069	GAS2L2	growth arrest specific 2 like 2
10594	0.10015	13351	0.057015	1.7565	0.079009	0.70069	PRPF8	pre-mRNA processing factor 8
1727	-0.12625	12094	0.071909	-1.7557	0.079133	0.70133	CYB5R3	cytochrome b5 reductase 3
65268	5.6064	3.4389	3.1945	1.755	0.079251	0.70147	WNK2	WNK lysine deficient protein kinase 2
390275	6.0859	3.5356	3.4677	1.755	0.079255	0.70147	OR8A1	olfactory receptor family 8 subfamily A member 1
5347	0.5461	242.44	0.31146	1.7533	0.079543	0.70337	PLK1	polo like kinase 1
93436	-0.24119	1339.4	0.13757	-1.7532	0.079575	0.70337	ARMC6	armadillo repeat containing 6
79609	0.50905	256.21	0.29062	1.7516	0.079843	0.70481	VCPKMT	valosin containing protein lysine methyltransferase
113178	-0.16873	5078.9	0.096349	-1.7512	0.079912	0.70481	SCAMP4	secretory carrier membrane protein 4
1663	0.35639	668.44	0.2036	1.7505	0.080038	0.70481	DDX11	DEAD/H-box helicase 11
4697	-0.18939	2513.5	0.1082	-1.7504	0.080047	0.70481	NDUFA4	NDUFA4 mitochondrial complex associated
2033	0.13287	6012.6	0.075906	1.7504	0.080051	0.70481	EP300	E1A binding protein p300
340485	0.34858	601.79	0.19914	1.7504	0.080054	0.70481	ACER2	alkaline ceramidase 2
51199	0.15612	4546.5	0.089213	1.7499	0.080129	0.705	NIN	ninein
79814	1.9776	20.189	1.1308	1.7489	0.08031	0.705	AGMAT	agmatinase
388630	5.3887	4.2221	3.0814	1.7488	0.08033	0.705	TRABD2B	TraB domain containing 2B
57582	-5.1978	5.1012	2.9723	-1.7488	0.080333	0.705	KCNT1	potassium sodium-activated channel subfamily T member 1
83743	-0.22183	1697.5	0.12686	-1.7486	0.080358	0.705	GRWD1	glutamate rich WD repeat containing 1
9731	0.23347	2132.5	0.13354	1.7483	0.080407	0.705	CEP104	centrosomal protein 104
1840	5.4487	4.1708	3.1174	1.7479	0.080489	0.705	DTX1	deltex E3 ubiquitin ligase 1
402160	2.9959	9.4553	1.7143	1.7476	0.080537	0.705	CFAP99	cilia and flagella associated protein 99
26277	-0.20967	1691.4	0.12001	-1.7472	0.080611	0.705	TINF2	TERF1 interacting nuclear factor 2
222662	5.9474	4.1093	3.4044	1.7469	0.080646	0.705	LHFPL5	LHFPL tetraspan subfamily member 5
60681	-0.11516	10469	0.065923	-1.7468	0.080664	0.705	FKBP10	FKBP prolyl isomerase 10
642946	0.9819	107.62	0.56223	1.7464	0.080734	0.705	FLVCR1-DT	FLVCR1 divergent transcript
51631	0.17033	3685.2	0.097541	1.7463	0.080762	0.705	LUC7L2	"LUC7 like 2, pre-mRNA splicing factor"
55930	0.30099	825.43	0.17242	1.7456	0.080872	0.70543	MYO5C	myosin VC
8786	0.25816	1770	0.14793	1.7451	0.080969	0.70543	RGS11	regulator of G protein signaling 11
767	-1.8628	37.212	1.0675	-1.745	0.080985	0.70543	CA8	carbonic anhydrase 8
9532	-0.33663	705.83	0.19293	-1.7448	0.081022	0.70543	BAG2	BAG cochaperone 2
7593	0.23467	1597.6	0.13453	1.7443	0.081106	0.7057	MZF1	myeloid zinc finger 1
51259	-0.51598	272.42	0.29596	-1.7434	0.081262	0.70629	TMEM216	transmembrane protein 216
997	-0.17409	2897.9	0.099862	-1.7433	0.08128	0.70629	CDC34	cell division cycle 34
55148	-0.27791	869.51	0.15945	-1.7429	0.081346	0.70641	UBR7	ubiquitin protein ligase E3 component n-recognin 7
79990	-0.351	823.53	0.20149	-1.742	0.0815	0.70669	PLEKHH3	"pleckstrin homology, MyTH4 and FERM domain containing H3"
6484	-0.33208	831.16	0.19063	-1.742	0.081503	0.70669	ST3GAL4	"ST3 beta-galactoside alpha-2,3-sialyltransferase 4"
6647	-0.17135	4945.1	0.098371	-1.7418	0.081537	0.70669	SOD1	superoxide dismutase 1
5348	1.2892	37.614	0.74029	1.7415	0.081603	0.7068	FXYD1	FXYD domain containing ion transport regulator 1
83855	-0.26316	2523.5	0.15118	-1.7408	0.081722	0.70737	KLF16	Kruppel like factor 16
468	-0.11157	11793	0.064102	-1.7404	0.081781	0.70743	ATF4	activating transcription factor 4
158158	6.1176	4.299	3.5168	1.7395	0.081939	0.7081	RASEF	RAS and EF-hand domain containing
221908	0.29973	824.01	0.17238	1.7387	0.082082	0.7081	PPP1R35	protein phosphatase 1 regulatory subunit 35
27006	-4.645	7.878	2.6716	-1.7387	0.082093	0.7081	FGF22	fibroblast growth factor 22
100128327	-5.3851	4.5217	3.0976	-1.7385	0.082126	0.7081	TRAPPC3L	trafficking protein particle complex 3 like
8972	6.0442	3.4313	3.477	1.7383	0.082154	0.7081	MGAM	maltase-glucoamylase
2175	0.76339	146.51	0.43919	1.7382	0.082177	0.7081	FANCA	FA complementation group A
4651	0.10278	9585.8	0.059157	1.7375	0.082301	0.70871	MYO10	myosin X
25825	-0.091866	16305	0.052887	-1.737	0.082383	0.70896	BACE2	beta-secretase 2
100526693	0.96271	148.61	0.55454	1.736	0.082556	0.71	ARPC4-TTLL3	ARPC4-TTLL3 readthrough
57505	-0.23924	1293.2	0.13785	-1.7354	0.082664	0.71046	AARS2	"alanyl-tRNA synthetase 2, mitochondrial"
84502	-5.8956	4.3291	3.3998	-1.7341	0.082899	0.71176	JPH4	junctophilin 4
94101	0.22923	1584.2	0.1322	1.734	0.082922	0.71176	ORMDL1	ORMDL sphingolipid biosynthesis regulator 1
55787	0.32325	823.53	0.18646	1.7336	0.082989	0.71188	TXLNG	taxilin gamma
728340	0.39399	569.18	0.22748	1.732	0.083279	0.71326	GTF2H2C	GTF2H2 family member C
4881	-0.38385	524.69	0.22165	-1.7318	0.08331	0.71326	NPR1	natriuretic peptide receptor 1
55327	0.23619	1728	0.13638	1.7318	0.08331	0.71326	LIN7C	"lin-7 homolog C, crumbs cell polarity complex component"
81609	0.21195	1559.7	0.12245	1.7309	0.083468	0.71375	SNX27	sorting nexin 27
23479	0.14337	4287.1	0.082834	1.7308	0.083484	0.71375	ISCU	iron-sulfur cluster assembly enzyme
9742	0.24053	1362.3	0.139	1.7304	0.083564	0.71375	IFT140	intraflagellar transport 140
170954	-0.1139	8615.5	0.06583	-1.7302	0.0836	0.71375	PPP1R18	protein phosphatase 1 regulatory subunit 18
10459	-0.32086	628.81	0.18553	-1.7294	0.083739	0.71375	MAD2L2	mitotic arrest deficient 2 like 2
4359	-0.56405	204.82	0.32618	-1.7293	0.083756	0.71375	MPZ	myelin protein zero
79365	-0.5006	254.4	0.28952	-1.7291	0.08379	0.71375	BHLHE41	basic helix-loop-helix family member e41
25858	5.9404	3.3082	3.4367	1.7285	0.083899	0.71375	CATSPERZ	catsper channel auxiliary subunit zeta
84436	0.20636	1917.6	0.1194	1.7284	0.083923	0.71375	ZNF528	zinc finger protein 528
60560	0.25949	1084.1	0.15014	1.7283	0.083937	0.71375	NAA35	"N-alpha-acetyltransferase 35, NatC auxiliary subunit"
1155	-0.20081	1914.3	0.11622	-1.7278	0.084019	0.71375	TBCB	tubulin folding cofactor B
55631	0.33106	708.99	0.19161	1.7278	0.084029	0.71375	LRRC40	leucine rich repeat containing 40
9453	-0.26489	1238.6	0.15333	-1.7276	0.084061	0.71375	GGPS1	geranylgeranyl diphosphate synthase 1
83986	-0.13029	5706.9	0.075465	-1.7264	0.084269	0.71468	FAM234A	family with sequence similarity 234 member A
101060684	0.24298	1332.7	0.14074	1.7264	0.084279	0.71468	NBPF26	NBPF member 26
8602	0.19451	2775.1	0.11274	1.7253	0.084473	0.71505	NOP14	NOP14 nucleolar protein
5360	-0.19287	3005.5	0.1118	-1.7251	0.084516	0.71505	PLTP	phospholipid transfer protein
221424	2.1559	21.362	1.2498	1.725	0.084536	0.71505	LRRC73	leucine rich repeat containing 73
26050	5.5315	4.1875	3.2069	1.7249	0.084546	0.71505	SLITRK5	SLIT and NTRK like family member 5
93663	0.1284	4801.9	0.074451	1.7246	0.084602	0.71505	ARHGAP18	Rho GTPase activating protein 18
54981	0.38746	601.47	0.22471	1.7243	0.084658	0.71505	NMRK1	nicotinamide riboside kinase 1
25957	0.17397	5130.8	0.10091	1.7241	0.084696	0.71505	PNISR	PNN interacting serine and arginine rich protein
7138	0.59242	199.46	0.34368	1.7238	0.08475	0.71505	TNNT1	"troponin T1, slow skeletal type"
25994	-0.16133	2916.4	0.093645	-1.7228	0.084926	0.71542	HIGD1A	HIG1 hypoxia inducible domain family member 1A
2975	0.14862	6151.5	0.086275	1.7226	0.084957	0.71542	GTF3C1	general transcription factor IIIC subunit 1
29126	-0.21901	1935.7	0.12714	-1.7226	0.084963	0.71542	CD274	CD274 molecule
56521	-2.1025	16.461	1.2209	-1.7221	0.085056	0.71542	DNAJC12	DnaJ heat shock protein family (Hsp40) member C12
79158	0.14377	3945	0.083502	1.7217	0.085117	0.71542	GNPTAB	N-acetylglucosamine-1-phosphate transferase subunits alpha and beta
23387	0.21863	1423.4	0.12698	1.7217	0.085127	0.71542	SIK3	SIK family kinase 3
22890	0.18429	1978.6	0.10708	1.721	0.085249	0.71542	ZBTB1	zinc finger and BTB domain containing 1
7681	-3.1406	9.1276	1.825	-1.7209	0.085264	0.71542	MKRN3	makorin ring finger protein 3
1465	-0.11159	9306.7	0.064843	-1.7209	0.085277	0.71542	CSRP1	cysteine and glycine rich protein 1
4017	-0.085426	23219	0.049655	-1.7204	0.08536	0.71558	LOXL2	lysyl oxidase like 2
1143	6.0064	4.5269	3.4919	1.7201	0.085415	0.71558	CHRNB4	cholinergic receptor nicotinic beta 4 subunit
1299	1.8123	41.25	1.0538	1.7198	0.08546	0.71558	COL9A3	collagen type IX alpha 3 chain
148170	-0.20503	2660.5	0.11923	-1.7196	0.08551	0.71558	CDC42EP5	CDC42 effector protein 5
8681	0.32234	707.79	0.18755	1.7187	0.085676	0.71652	JMJD7-PLA2G4B	JMJD7-PLA2G4B readthrough
26578	0.21894	1817.1	0.12742	1.7182	0.085768	0.71685	OSTF1	osteoclast stimulating factor 1
10564	0.14938	5753.4	0.086971	1.7176	0.085867	0.71722	ARFGEF2	ADP ribosylation factor guanine nucleotide exchange factor 2
6597	0.13626	7365.8	0.079351	1.7172	0.085947	0.71744	SMARCA4	"SWI/SNF related, matrix associated, actin dependent regulator of chromatin, subfamily a, member 4"
4171	-0.40697	448.39	0.23714	-1.7161	0.086138	0.71795	MCM2	minichromosome maintenance complex component 2
29984	-0.37029	485.54	0.21581	-1.7159	0.086185	0.71795	RHOD	ras homolog family member D
85021	0.21032	1702.7	0.12258	1.7157	0.08621	0.71795	REPS1	RALBP1 associated Eps domain containing 1
55209	0.12985	5757	0.075687	1.7157	0.086226	0.71795	SETD5	SET domain containing 5
116534	-1.1366	50.772	0.66272	-1.715	0.086338	0.71795	MRGPRE	MAS related GPR family member E
51005	0.17118	3010.8	0.09983	1.7147	0.086402	0.71795	AMDHD2	amidohydrolase domain containing 2
80762	-0.14744	4660.6	0.086008	-1.7143	0.086481	0.71795	NDFIP1	Nedd4 family interacting protein 1
80323	0.28348	1058	0.16537	1.7142	0.086491	0.71795	CCDC68	coiled-coil domain containing 68
144983	-2.2776	117.9	1.3287	-1.7142	0.086492	0.71795	HNRNPA1L2	heterogeneous nuclear ribonucleoprotein A1 like 2
84210	0.78945	100.19	0.46074	1.7134	0.086632	0.71867	ANKRD20A1	ankyrin repeat domain 20 family member A1
5430	0.13154	9354.4	0.076788	1.713	0.08671	0.71887	POLR2A	RNA polymerase II subunit A
79191	-1.1369	66.572	0.66411	-1.712	0.086902	0.72001	IRX3	iroquois homeobox 3
4633	5.0927	5.1416	2.9762	1.7112	0.087052	0.72081	MYL2	myosin light chain 2
55635	-3.3152	10.368	1.9379	-1.7107	0.087134	0.72105	DEPDC1	DEP domain containing 1
10140	0.23988	1235.7	0.14028	1.71	0.087275	0.72146	TOB1	"transducer of ERBB2, 1"
124961	0.44765	540.96	0.26181	1.7099	0.087292	0.72146	ZFP3	ZFP3 zinc finger protein
79870	1.4995	31.705	0.87756	1.7087	0.087511	0.72173	BAALC	BAALC binder of MAP3K1 and KLF4
730098	1.5832	35.587	0.9266	1.7086	0.087524	0.72173	LOC730098	uncharacterized LOC730098
57477	0.14945	3479.2	0.087474	1.7085	0.087537	0.72173	SHROOM4	shroom family member 4
7399	3.6578	7.0347	2.1409	1.7085	0.087541	0.72173	USH2A	usherin
22866	6.0064	4.3732	3.5164	1.7081	0.087616	0.7219	CNKSR2	connector enhancer of kinase suppressor of Ras 2
51333	-0.39486	432.33	0.23131	-1.7071	0.087812	0.7221	ZNF771	zinc finger protein 771
27229	0.36904	737.69	0.21621	1.7069	0.087846	0.7221	TUBGCP4	tubulin gamma complex associated protein 4
6618	-0.24338	1184.7	0.1426	-1.7067	0.08787	0.7221	SNAPC2	small nuclear RNA activating complex polypeptide 2
10101	-0.19629	1689.3	0.11503	-1.7065	0.087909	0.7221	NUBP2	nucleotide binding protein 2
29098	-0.42316	485.2	0.24797	-1.7065	0.087911	0.7221	RANGRF	RAN guanine nucleotide release factor
91807	-5.7472	4.4996	3.3701	-1.7054	0.088129	0.72292	MYLK3	myosin light chain kinase 3
10848	-0.16096	3311.4	0.094391	-1.7052	0.088153	0.72292	PPP1R13L	protein phosphatase 1 regulatory subunit 13 like
405	0.20693	2367.5	0.12136	1.7051	0.088178	0.72292	ARNT	aryl hydrocarbon receptor nuclear translocator
11284	0.21652	2247.2	0.12701	1.7048	0.088227	0.72292	PNKP	polynucleotide kinase 3'-phosphatase
55911	-3.4661	8.6184	2.0339	-1.7042	0.088349	0.72347	APOBR	apolipoprotein B receptor
79868	0.27228	1273.7	0.15982	1.7036	0.088451	0.72387	ALG13	ALG13 UDP-N-acetylglucosaminyltransferase subunit
342931	-4.7864	4.7751	2.8112	-1.7026	0.088642	0.72432	RFPL4A	ret finger protein like 4A
400668	5.3546	5.7642	3.145	1.7026	0.088648	0.72432	PRSS57	serine protease 57
55178	-0.35001	634.82	0.20559	-1.7025	0.088669	0.72432	MRM3	mitochondrial rRNA methyltransferase 3
79770	-0.19027	2047.8	0.1118	-1.7019	0.088779	0.72449	TXNDC15	thioredoxin domain containing 15
57184	0.25888	2314.7	0.15213	1.7018	0.088799	0.72449	FAM219B	family with sequence similarity 219 member B
6139	0.1181	16599	0.069418	1.7013	0.088877	0.72469	RPL17	ribosomal protein L17
79905	0.44826	390.5	0.26363	1.7003	0.089068	0.72574	TMC7	transmembrane channel like 7
57338	5.4191	4.4444	3.1876	1.7001	0.089115	0.72574	JPH3	junctophilin 3
5204	-0.1555	3531.2	0.09151	-1.6992	0.089273	0.72657	PFDN5	prefoldin subunit 5
10898	0.25289	1499.9	0.14887	1.6987	0.089372	0.72657	CPSF4	cleavage and polyadenylation specific factor 4
7134	5.0605	4.9878	2.9791	1.6987	0.08938	0.72657	TNNC1	"troponin C1, slow skeletal and cardiac type"
4170	-0.085627	13913	0.050455	-1.6971	0.089677	0.72824	MCL1	"MCL1 apoptosis regulator, BCL2 family member"
23506	0.33267	686.57	0.19608	1.6967	0.08976	0.72824	BICRAL	BRD4 interacting chromatin remodeling complex associated protein like
401027	1.1708	54.721	0.69005	1.6966	0.089764	0.72824	C2orf66	chromosome 2 open reading frame 66
29924	-0.14354	6835.7	0.084635	-1.6959	0.089896	0.72824	EPN1	epsin 1
7525	0.12806	6837	0.075518	1.6958	0.089927	0.72824	YES1	"YES proto-oncogene 1, Src family tyrosine kinase"
148156	0.561	207.55	0.3309	1.6954	0.090007	0.72824	ZNF558	zinc finger protein 558
55326	-0.19793	2517.8	0.11677	-1.695	0.090084	0.72824	AGPAT5	1-acylglycerol-3-phosphate O-acyltransferase 5
158326	5.5375	3.8642	3.2673	1.6949	0.090103	0.72824	FREM1	FRAS1 related extracellular matrix 1
64410	-0.48229	372.14	0.28456	-1.6948	0.090104	0.72824	KLHL25	kelch like family member 25
10423	-0.14304	3430.5	0.08443	-1.6942	0.09022	0.72824	CDIPT	CDP-diacylglycerol--inositol 3-phosphatidyltransferase
2834	-5.3159	3.1734	3.1392	-1.6934	0.090376	0.72824	PRLHR	prolactin releasing hormone receptor
89953	0.31721	768.44	0.18732	1.6934	0.090377	0.72824	KLC4	kinesin light chain 4
467	-0.13838	4667.6	0.081717	-1.6934	0.090379	0.72824	ATF3	activating transcription factor 3
22921	0.42395	355.56	0.25036	1.6934	0.09038	0.72824	MSRB2	methionine sulfoxide reductase B2
9481	0.85484	97.145	0.50484	1.6933	0.090403	0.72824	SLC25A27	solute carrier family 25 member 27
55182	-0.18745	2330.7	0.11078	-1.692	0.090639	0.7297	RNF220	ring finger protein 220
65990	-0.41885	573.84	0.24759	-1.6917	0.090701	0.72976	ANTKMT	adenine nucleotide translocase lysine methyltransferase
10808	-0.11336	7510.8	0.06702	-1.6914	0.090762	0.72981	HSPH1	heat shock protein family H (Hsp110) member 1
3014	-0.32102	791.3	0.18991	-1.6904	0.090959	0.73014	H2AX	H2A.X variant histone
3773	-4.228	6.6524	2.5015	-1.6902	0.09099	0.73014	KCNJ16	potassium inwardly rectifying channel subfamily J member 16
113675	-0.36587	472.11	0.21655	-1.6896	0.091113	0.73014	SDSL	serine dehydratase like
146712	0.55375	236.57	0.32776	1.6895	0.091131	0.73014	B3GNTL1	"UDP-GlcNAc:betaGal beta-1,3-N-acetylglucosaminyltransferase like 1"
55905	-0.14455	3735.8	0.085558	-1.6894	0.091133	0.73014	RNF114	ring finger protein 114
92106	-0.56407	303.14	0.3339	-1.6894	0.091152	0.73014	OXNAD1	oxidoreductase NAD binding domain containing 1
90333	0.28237	1008.1	0.16717	1.6892	0.091185	0.73014	ZNF468	zinc finger protein 468
100652833	6.0631	4.0351	3.59	1.6889	0.09124	0.73014	LOC100652833	putative POM121-like protein 1-like
5781	0.10368	8841	0.061448	1.6873	0.091554	0.73182	PTPN11	protein tyrosine phosphatase non-receptor type 11
11238	0.57523	249.81	0.34095	1.6871	0.091582	0.73182	CA5B	carbonic anhydrase 5B
23130	0.14572	3567.6	0.08642	1.6862	0.091756	0.73182	ATG2A	autophagy related 2A
5827	-0.65659	143.47	0.38946	-1.6859	0.091818	0.73182	PXMP2	peroxisomal membrane protein 2
11127	0.30772	1188.7	0.18255	1.6857	0.091862	0.73182	KIF3A	kinesin family member 3A
377841	-4.5798	7.7172	2.7173	-1.6854	0.09191	0.73182	ENTPD8	ectonucleoside triphosphate diphosphohydrolase 8
132299	-0.20586	2977.1	0.12216	-1.6852	0.091944	0.73182	OCIAD2	OCIA domain containing 2
6472	-0.13864	5325.1	0.082273	-1.6852	0.091959	0.73182	SHMT2	serine hydroxymethyltransferase 2
59271	-0.21508	1601.8	0.12769	-1.6845	0.092091	0.73182	EVA1C	eva-1 homolog C
141	-0.35468	599.17	0.2106	-1.6842	0.092149	0.73182	ADPRH	ADP-ribosylarginine hydrolase
10585	0.15273	2926.2	0.090704	1.6838	0.092223	0.73182	POMT1	protein O-mannosyltransferase 1
84971	-0.31507	684.23	0.18717	-1.6834	0.092305	0.73182	ATG4D	autophagy related 4D cysteine peptidase
54978	-0.17731	2541.5	0.10534	-1.6833	0.092316	0.73182	SLC35F6	solute carrier family 35 member F6
6506	-5.7827	3.2107	3.4358	-1.6831	0.092362	0.73182	SLC1A2	solute carrier family 1 member 2
79363	-0.68	149.55	0.40412	-1.6827	0.092436	0.73182	CPLANE2	ciliogenesis and planar polarity effector 2
26022	-0.15987	2713.8	0.095009	-1.6827	0.092437	0.73182	TMEM98	transmembrane protein 98
388341	-0.67665	185.45	0.40237	-1.6816	0.092637	0.73182	LRRC75A	leucine rich repeat containing 75A
23385	-0.11379	8015.4	0.067682	-1.6813	0.092707	0.73182	NCSTN	nicastrin
3066	-0.13867	3898.3	0.082478	-1.6813	0.092709	0.73182	HDAC2	histone deacetylase 2
56655	-0.49509	340.28	0.29456	-1.6808	0.092804	0.73182	POLE4	"DNA polymerase epsilon 4, accessory subunit"
387707	3.3461	10.125	1.9908	1.6808	0.092811	0.73182	CC2D2B	coiled-coil and C2 domain containing 2B
6045	0.29116	820.49	0.17325	1.6806	0.092839	0.73182	RNF2	ring finger protein 2
9697	0.11002	13403	0.065481	1.6803	0.092907	0.73182	TRAM2	translocation associated membrane protein 2
81790	0.2668	976.46	0.1588	1.6801	0.092942	0.73182	RNF170	ring finger protein 170
6452	0.1588	4952.9	0.094537	1.6798	0.093003	0.73182	SH3BP2	SH3 domain binding protein 2
54626	0.27259	1056.5	0.1623	1.6796	0.093042	0.73182	HES2	hes family bHLH transcription factor 2
138715	-4.1671	10.475	2.4812	-1.6794	0.093067	0.73182	ARID3C	AT-rich interaction domain 3C
11228	0.23594	2184.4	0.14051	1.6792	0.09311	0.73182	RASSF8	Ras association domain family member 8
10567	-0.16494	4348.1	0.098234	-1.6791	0.093131	0.73182	RABAC1	Rab acceptor 1
4355	1.0655	52.437	0.6346	1.6791	0.093135	0.73182	MPP2	membrane palmitoylated protein 2
51286	1.0429	69.292	0.62113	1.679	0.093161	0.73182	CEND1	cell cycle exit and neuronal differentiation 1
241	3.5769	11.77	2.1311	1.6785	0.093257	0.73182	ALOX5AP	arachidonate 5-lipoxygenase activating protein
54976	-0.29381	925.15	0.17508	-1.6782	0.093309	0.73182	C20orf27	chromosome 20 open reading frame 27
64847	0.17008	3693.4	0.10136	1.678	0.093346	0.73182	SPATA20	spermatogenesis associated 20
9101	0.15668	2648.8	0.093445	1.6768	0.093589	0.73182	USP8	ubiquitin specific peptidase 8
10287	-0.3345	605.14	0.1995	-1.6767	0.093593	0.73182	RGS19	regulator of G protein signaling 19
116228	0.43675	681.13	0.26052	1.6765	0.093643	0.73182	COX20	cytochrome c oxidase assembly factor COX20
79903	-0.19149	2369	0.11424	-1.6763	0.093689	0.73182	NAA60	"N-alpha-acetyltransferase 60, NatF catalytic subunit"
84717	-0.14297	4058.7	0.085301	-1.6761	0.093724	0.73182	HDGFL2	HDGF like 2
90522	-0.19386	2190.5	0.11567	-1.676	0.093741	0.73182	YIF1B	"Yip1 interacting factor homolog B, membrane trafficking protein"
8837	0.08343	23530	0.049782	1.6759	0.093758	0.73182	CFLAR	CASP8 and FADD like apoptosis regulator
7504	5.6974	3.2705	3.4	1.6757	0.093798	0.73182	XK	X-linked Kx blood group
3725	0.093389	10913	0.055739	1.6755	0.093842	0.73182	JUN	"Jun proto-oncogene, AP-1 transcription factor subunit"
7384	-0.13795	4149.5	0.082337	-1.6754	0.093861	0.73182	UQCRC1	ubiquinol-cytochrome c reductase core protein 1
11198	0.17111	3486.1	0.10221	1.6741	0.094101	0.73307	SUPT16H	"SPT16 homolog, facilitates chromatin remodeling subunit"
56100	-0.64944	271.56	0.38796	-1.674	0.094131	0.73307	PCDHGB6	"protocadherin gamma subfamily B, 6"
168455	-0.21743	1992.2	0.12994	-1.6734	0.094257	0.73319	CCDC71L	coiled-coil domain containing 71 like
54555	-0.27759	1408.1	0.16594	-1.6728	0.094363	0.73319	DDX49	DEAD-box helicase 49
51187	-0.19285	2489.2	0.1153	-1.6727	0.09439	0.73319	RSL24D1	ribosomal L24 domain containing 1
5175	-0.079584	79016	0.047579	-1.6727	0.094392	0.73319	PECAM1	platelet and endothelial cell adhesion molecule 1
7155	0.11927	4966.5	0.071321	1.6724	0.094455	0.73319	TOP2B	DNA topoisomerase II beta
345757	-0.43127	503.34	0.25798	-1.6718	0.094574	0.73319	FAM174A	family with sequence similarity 174 member A
148137	0.31941	1068.8	0.19107	1.6716	0.094593	0.73319	PROSER3	proline and serine rich 3
4217	0.25549	1012.5	0.15285	1.6714	0.094633	0.73319	MAP3K5	mitogen-activated protein kinase kinase kinase 5
26145	-0.23568	1369.1	0.14105	-1.6709	0.094736	0.73319	IRF2BP1	interferon regulatory factor 2 binding protein 1
255057	-0.23667	1687.5	0.14165	-1.6708	0.094761	0.73319	CBARP	CACN subunit beta associated regulatory protein
165082	-2.3779	14.724	1.4235	-1.6704	0.094844	0.73319	ADGRF3	adhesion G protein-coupled receptor F3
4016	0.32997	767.42	0.19765	1.6695	0.09502	0.73319	LOXL1	lysyl oxidase like 1
51319	0.39499	424.52	0.23661	1.6694	0.095044	0.73319	RSRC1	arginine and serine rich coiled-coil 1
9674	0.26786	867.12	0.16046	1.6693	0.095049	0.73319	KIAA0040	KIAA0040
50619	1.1039	55.809	0.6613	1.6693	0.095061	0.73319	DEF6	DEF6 guanine nucleotide exchange factor
84915	-1.0033	57.742	0.60109	-1.6692	0.095086	0.73319	FAM222A	family with sequence similarity 222 member A
135228	0.1154	8960.1	0.069148	1.6689	0.095137	0.73319	CD109	CD109 molecule
55660	0.14793	4991.8	0.08865	1.6687	0.095173	0.73319	PRPF40A	pre-mRNA processing factor 40 homolog A
83707	0.35709	528.79	0.21403	1.6685	0.095224	0.73319	TRPT1	tRNA phosphotransferase 1
6193	-0.10101	14462	0.060547	-1.6684	0.095244	0.73319	RPS5	ribosomal protein S5
375056	0.14304	3486.9	0.085755	1.668	0.095307	0.73319	MIA3	MIA SH3 domain ER export factor 3
5211	-0.1221	12285	0.073216	-1.6677	0.095367	0.73319	PFKL	"phosphofructokinase, liver type"
10865	-0.25947	1259.6	0.1556	-1.6675	0.095409	0.73319	ARID5A	AT-rich interaction domain 5A
7812	-0.083857	19478	0.050305	-1.667	0.095519	0.73362	CSDE1	cold shock domain containing E1
100101467	0.20859	2007	0.12522	1.6658	0.095761	0.73388	ZSCAN30	zinc finger and SCAN domain containing 30
254048	0.18231	2122.3	0.1095	1.6649	0.095934	0.73388	UBN2	ubinuclein 2
79891	0.50327	329.49	0.30229	1.6648	0.095946	0.73388	ZNF671	zinc finger protein 671
6723	-0.20993	1953.6	0.12611	-1.6646	0.095987	0.73388	SRM	spermidine synthase
643641	0.21112	1573.9	0.12683	1.6646	0.095988	0.73388	ZNF862	zinc finger protein 862
4548	0.13155	5175.6	0.079033	1.6645	0.096007	0.73388	MTR	5-methyltetrahydrofolate-homocysteine methyltransferase
3972	-6.0364	3.9514	3.627	-1.6643	0.096058	0.73388	LHB	luteinizing hormone subunit beta
3931	0.29006	788.23	0.17429	1.6643	0.09606	0.73388	LCAT	lecithin-cholesterol acyltransferase
286256	4.1598	6.541	2.4998	1.664	0.096108	0.73388	LCN12	lipocalin 12
2055	0.23728	2393.3	0.14263	1.6636	0.096184	0.73388	CLN8	CLN8 transmembrane ER and ERGIC protein
79923	-4.5963	3.4943	2.7629	-1.6636	0.096195	0.73388	NANOG	Nanog homeobox
147699	-1.3794	35.494	0.82928	-1.6633	0.096243	0.73388	PPM1N	"protein phosphatase, Mg2+/Mn2+ dependent 1N (putative)"
91056	-0.25217	1958.1	0.15168	-1.6625	0.096412	0.73388	AP5B1	adaptor related protein complex 5 subunit beta 1
10048	0.19863	1696	0.1195	1.6622	0.096482	0.73388	RANBP9	RAN binding protein 9
5743	-0.22343	1797.6	0.13443	-1.6621	0.096494	0.73388	PTGS2	prostaglandin-endoperoxide synthase 2
84516	0.11899	5097.7	0.071601	1.6619	0.096537	0.73388	DCTN5	dynactin subunit 5
83723	5.5061	5.4382	3.3134	1.6618	0.096562	0.73388	TLCD3B	TLC domain containing 3B
23187	0.13824	8486	0.083194	1.6616	0.096592	0.73388	PHLDB1	pleckstrin homology like domain family B member 1
6596	0.26891	1544.8	0.16184	1.6616	0.096598	0.73388	HLTF	helicase like transcription factor
100505876	0.18639	2131.2	0.11224	1.6606	0.096791	0.73493	CEBPZOS	CEBPZ opposite strand
51224	5.7843	3.1262	3.4859	1.6593	0.097049	0.73562	ELOA2	elongin A2
2915	-4.6292	5.0753	2.7903	-1.659	0.097109	0.73562	GRM5	glutamate metabotropic receptor 5
10576	-0.14415	4730.5	0.086896	-1.6589	0.097132	0.73562	CCT2	chaperonin containing TCP1 subunit 2
10060	4.9827	4.6206	3.0036	1.6589	0.097138	0.73562	ABCC9	ATP binding cassette subfamily C member 9
83860	0.278	1236.1	0.16762	1.6585	0.097209	0.73562	TAF3	TATA-box binding protein associated factor 3
7431	-0.07832	248480	0.047223	-1.6585	0.097213	0.73562	VIM	vimentin
387700	-5.385	5.4113	3.2483	-1.6578	0.097359	0.73608	SLC16A12	solute carrier family 16 member 12
220042	0.85827	248.15	0.51776	1.6577	0.097383	0.73608	DDIAS	DNA damage induced apoptosis suppressor
64768	-0.22855	1225.5	0.13792	-1.6572	0.097487	0.73644	IPPK	inositol-pentakisphosphate 2-kinase
1284	-0.097838	54373	0.059068	-1.6564	0.09765	0.73693	COL4A2	collagen type IV alpha 2 chain
80306	0.14573	3185.5	0.087985	1.6563	0.097661	0.73693	MED28	mediator complex subunit 28
3728	-0.15353	9311.5	0.092734	-1.6556	0.097798	0.73754	JUP	junction plakoglobin
3123	-2.9328	11.386	1.7719	-1.6551	0.097896	0.73786	HLA-DRB1	"major histocompatibility complex, class II, DR beta 1"
7559	-0.21482	1401.3	0.12983	-1.6546	0.097998	0.73793	ZNF12	zinc finger protein 12
84141	-0.27908	811.47	0.16868	-1.6546	0.098015	0.73793	EVA1A	"eva-1 homolog A, regulator of programmed cell death"
100130370	-3.9632	7.7972	2.3976	-1.653	0.098335	0.73974	LOC100130370	uncharacterized LOC100130370
445329	0.72629	127.7	0.43943	1.6528	0.098366	0.73974	SULT1A4	sulfotransferase family 1A member 4
1945	-0.38732	405.44	0.23446	-1.652	0.098536	0.7406	EFNA4	ephrin A4
388135	-1.9149	30.561	1.1594	-1.6517	0.098599	0.74066	INSYN1	inhibitory synaptic factor 1
147664	-4.4429	6.2545	2.6905	-1.6513	0.098675	0.74081	ERVV-1	"endogenous retrovirus group V member 1, envelope"
4860	-0.13225	4851.7	0.080105	-1.651	0.098747	0.74094	PNP	purine nucleoside phosphorylase
100302246	-5.5359	3.0423	3.3545	-1.6503	0.098878	0.74128	MIR1301	microRNA 1301
100507588	-0.77391	107.04	0.46901	-1.6501	0.098922	0.74128	TGFBR3L	transforming growth factor beta receptor 3 like
168667	-5.4546	5.0835	3.3064	-1.6497	0.098998	0.74128	BMPER	BMP binding endothelial regulator
5903	0.12254	9558.6	0.074284	1.6496	0.099015	0.74128	RANBP2	RAN binding protein 2
10815	-1.286	80.695	0.77975	-1.6493	0.099092	0.74144	CPLX1	complexin 1
6050	-0.14742	8424.3	0.089413	-1.6487	0.099204	0.74144	RNH1	ribonuclease/angiogenin inhibitor 1
8933	-0.14871	3977.8	0.090196	-1.6487	0.099208	0.74144	RTL8C	retrotransposon Gag like 8C
10915	0.17302	3264.9	0.10496	1.6485	0.099259	0.74144	TCERG1	transcription elongation regulator 1
23199	0.24922	1232.7	0.15123	1.6479	0.099368	0.74168	GSE1	Gse1 coiled-coil protein
107984345	1.3016	41.749	0.79005	1.6474	0.099468	0.74168	SMIM38	small integral membrane protein 38
731220	0.7195	145.05	0.43679	1.6472	0.099508	0.74168	RFX8	"RFX family member 8, lacking RFX DNA binding domain"
3753	4.0192	4.9134	2.4407	1.6467	0.099616	0.74168	KCNE1	potassium voltage-gated channel subfamily E regulatory subunit 1
56111	0.35972	1157.1	0.21845	1.6467	0.09962	0.74168	PCDHGA4	"protocadherin gamma subfamily A, 4"
29914	-0.31662	739.96	0.19231	-1.6464	0.099685	0.74168	UBIAD1	UbiA prenyltransferase domain containing 1
255967	0.21318	1367.4	0.12949	1.6462	0.099712	0.74168	PAN3	poly(A) specific ribonuclease subunit PAN3
4162	-0.077182	87558	0.046892	-1.646	0.099773	0.74168	MCAM	melanoma cell adhesion molecule
322	-0.17665	2799.9	0.10733	-1.6458	0.0998	0.74168	APBB1	amyloid beta precursor protein binding family B member 1
10984	-0.3845	538.91	0.23366	-1.6456	0.099846	0.74168	KCNQ1OT1	KCNQ1 opposite strand/antisense transcript 1
64412	-0.28115	882.48	0.17101	-1.644	0.10017	0.74353	GZF1	GDNF inducible zinc finger protein 1
84747	0.22951	1676.7	0.13961	1.6439	0.10021	0.74353	UNC119B	unc-119 lipid binding chaperone B
23424	-0.22452	1601.5	0.13664	-1.6432	0.10035	0.74365	TDRD7	tudor domain containing 7
59340	-4.9684	5.0508	3.0242	-1.6429	0.10041	0.74365	HRH4	histamine receptor H4
10286	-0.28279	938.6	0.17215	-1.6427	0.10045	0.74365	BCAS2	BCAS2 pre-mRNA processing factor
116224	0.27516	871.59	0.16752	1.6426	0.10047	0.74365	FAM122A	family with sequence similarity 122A
7469	-0.2545	1059.6	0.15498	-1.6422	0.10055	0.74365	NELFA	negative elongation factor complex member A
51652	0.15464	3684.3	0.094172	1.6421	0.10057	0.74365	CHMP3	charged multivesicular body protein 3
8330	-5.3265	2.9654	3.2442	-1.6419	0.10062	0.74365	H2AC15	H2A clustered histone 15
2779	-5.6899	3.1732	3.4671	-1.6411	0.10077	0.74365	GNAT1	G protein subunit alpha transducin 1
64400	0.24136	1271.3	0.14708	1.641	0.10079	0.74365	AKTIP	AKT interacting protein
85464	0.12465	4896.4	0.075964	1.6408	0.10083	0.74365	SSH2	slingshot protein phosphatase 2
50840	-0.74694	113.76	0.45523	-1.6408	0.10084	0.74365	TAS2R14	taste 2 receptor member 14
6576	-0.1865	2688	0.11371	-1.6401	0.10098	0.74434	SLC25A1	solute carrier family 25 member 1
867	0.13627	5028.5	0.083101	1.6398	0.10105	0.74445	CBL	Cbl proto-oncogene
57508	0.25242	1134.6	0.15399	1.6392	0.10118	0.74469	INTS2	integrator complex subunit 2
10900	2.9438	10.333	1.7962	1.6389	0.10123	0.74469	RUNDC3A	RUN domain containing 3A
83541	-0.39077	420.47	0.23845	-1.6388	0.10125	0.74469	FAM110A	family with sequence similarity 110 member A
2107	-0.12039	5789.5	0.073497	-1.6381	0.10141	0.74516	ETF1	eukaryotic translation termination factor 1
148103	0.59177	224.55	0.36129	1.638	0.10143	0.74516	ZNF599	zinc finger protein 599
11018	-0.30099	1064.8	0.18384	-1.6373	0.10158	0.74582	TMED1	transmembrane p24 trafficking protein 1
10537	-1.0025	120.34	0.61242	-1.6369	0.10165	0.74593	UBD	ubiquitin D
5655	-1.0181	58.672	0.62206	-1.6366	0.10171	0.74597	KLK10	kallikrein related peptidase 10
1060	0.30435	787.77	0.18599	1.6364	0.10176	0.74597	CENPC	centromere protein C
6934	0.25961	973.38	0.15869	1.636	0.10185	0.74616	TCF7L2	transcription factor 7 like 2
9772	0.18488	2550	0.11303	1.6356	0.10193	0.74637	TMEM94	transmembrane protein 94
4913	-0.48754	404.82	0.29819	-1.635	0.10204	0.74679	NTHL1	nth like DNA glycosylase 1
832	-0.1084	7543.5	0.06633	-1.6342	0.10221	0.74759	CAPZB	capping actin protein of muscle Z-line subunit beta
590	-5.7106	3.0869	3.495	-1.6339	0.10228	0.74768	BCHE	butyrylcholinesterase
151525	0.47406	363.36	0.29032	1.6329	0.10249	0.74881	WDSUB1	"WD repeat, sterile alpha motif and U-box domain containing 1"
219654	0.25012	1071.3	0.15328	1.6317	0.10273	0.74956	ZCCHC24	zinc finger CCHC-type containing 24
117145	0.22044	1214.6	0.1351	1.6317	0.10275	0.74956	THEM4	thioesterase superfamily member 4
55251	0.22146	1911.4	0.13573	1.6316	0.10276	0.74956	PCMTD2	protein-L-isoaspartate (D-aspartate) O-methyltransferase domain containing 2
340547	0.81729	96.02	0.50103	1.6312	0.10285	0.74956	VSIG1	V-set and immunoglobulin domain containing 1
26471	-0.19981	1954.1	0.12251	-1.631	0.1029	0.74956	NUPR1	"nuclear protein 1, transcriptional regulator"
65108	-0.11163	7154.4	0.068486	-1.63	0.1031	0.74956	MARCKSL1	MARCKS like 1
101927957	-1.5086	34.659	0.92572	-1.6297	0.10317	0.74956	LINC01572	long intergenic non-protein coding RNA 1572
26191	0.53787	231.51	0.33012	1.6293	0.10325	0.74956	PTPN22	protein tyrosine phosphatase non-receptor type 22
286336	-0.46785	315.7	0.28722	-1.6289	0.10333	0.74956	FAM78A	family with sequence similarity 78 member A
57661	0.12644	4246.5	0.07764	1.6286	0.1034	0.74956	PHRF1	PHD and ring finger domains 1
126282	-0.12403	5398	0.076161	-1.6286	0.10341	0.74956	TNFAIP8L1	TNF alpha induced protein 8 like 1
8732	-0.32443	618.73	0.19925	-1.6282	0.10348	0.74956	RNGTT	RNA guanylyltransferase and 5'-phosphatase
11264	0.38412	456.2	0.23599	1.6277	0.10359	0.74956	PXMP4	peroxisomal membrane protein 4
257313	1.6506	20.916	1.0141	1.6276	0.10361	0.74956	UTS2B	urotensin 2B
338651	-0.72191	136.82	0.4436	-1.6274	0.10365	0.74956	KRTAP5-AS1	KRTAP5-1/KRTAP5-2 antisense RNA 1
80230	-0.17655	2330.6	0.10853	-1.6268	0.10378	0.74956	RUFY1	RUN and FYVE domain containing 1
8816	0.13296	3892	0.081738	1.6266	0.10381	0.74956	DCAF5	DDB1 and CUL4 associated factor 5
27086	0.21586	2023.3	0.13272	1.6264	0.10386	0.74956	FOXP1	forkhead box P1
256281	-0.26104	1118.8	0.16051	-1.6263	0.10388	0.74956	NUDT14	nudix hydrolase 14
375593	0.61781	163.13	0.37994	1.6261	0.10394	0.74956	TRIM73	tripartite motif containing 73
729920	-0.99531	58.678	0.61211	-1.626	0.10394	0.74956	CRPPA	CDP-L-ribitol pyrophosphorylase A
23770	-0.16401	9043.9	0.10088	-1.6258	0.10398	0.74956	FKBP8	FKBP prolyl isomerase 8
83982	-0.23005	1186.1	0.1415	-1.6258	0.104	0.74956	IFI27L2	interferon alpha inducible protein 27 like 2
79132	-0.25403	1200.6	0.15627	-1.6256	0.10403	0.74956	DHX58	DExH-box helicase 58
163033	-0.28876	1040.9	0.17766	-1.6253	0.10409	0.74956	ZNF579	zinc finger protein 579
219402	-0.25623	958.41	0.15766	-1.6252	0.10412	0.74956	MTIF3	mitochondrial translational initiation factor 3
51028	0.181	1824.4	0.11138	1.6251	0.10414	0.74956	VPS36	vacuolar protein sorting 36 homolog
7297	0.1559	4436.9	0.095939	1.625	0.10416	0.74956	TYK2	tyrosine kinase 2
573	-0.1863	2033.1	0.1147	-1.6242	0.10433	0.74957	BAG1	BAG cochaperone 1
3654	-0.1497	7334.7	0.092207	-1.6235	0.10448	0.74957	IRAK1	interleukin 1 receptor associated kinase 1
5337	0.13535	4967.5	0.083373	1.6234	0.1045	0.74957	PLD1	phospholipase D1
3431	-0.1757	2154.4	0.10823	-1.6234	0.10451	0.74957	SP110	SP110 nuclear body protein
133619	-0.16756	2703.3	0.10322	-1.6233	0.10452	0.74957	PRRC1	proline rich coiled-coil 1
4690	-0.17027	2701.6	0.10492	-1.623	0.1046	0.74957	NCK1	NCK adaptor protein 1
5810	-0.30786	572.04	0.18969	-1.6229	0.1046	0.74957	RAD1	RAD1 checkpoint DNA exonuclease
29896	0.19473	3050.7	0.12	1.6228	0.10463	0.74957	TRA2A	transformer 2 alpha homolog
6338	5.6842	3.7991	3.503	1.6226	0.10467	0.74957	SCNN1B	sodium channel epithelial 1 subunit beta
54904	0.13973	4223.2	0.086168	1.6216	0.10489	0.75005	NSD3	nuclear receptor binding SET domain protein 3
1992	0.25012	1266.1	0.15425	1.6215	0.10491	0.75005	SERPINB1	serpin family B member 1
348793	-0.43757	335.77	0.26987	-1.6214	0.10493	0.75005	WDR53	WD repeat domain 53
340591	0.44772	355.44	0.27615	1.6213	0.10496	0.75005	CA5BP1	carbonic anhydrase 5B pseudogene 1
55341	0.14906	2971.2	0.091966	1.6208	0.10506	0.75036	LSG1	large 60S subunit nuclear export GTPase 1
1140	-0.31671	600.06	0.19547	-1.6203	0.10517	0.75076	CHRNB1	cholinergic receptor nicotinic beta 1 subunit
7982	-0.3171	928.66	0.19574	-1.62	0.10523	0.75076	ST7	suppression of tumorigenicity 7
3234	-5.3849	3.7066	3.3252	-1.6194	0.10536	0.75113	HOXD8	homeobox D8
989	0.13109	6492.7	0.080987	1.6187	0.10552	0.75113	SEPTIN7	septin 7
582	0.24862	1283.4	0.15362	1.6184	0.10557	0.75113	BBS1	Bardet-Biedl syndrome 1
9781	-0.61599	191.68	0.38063	-1.6184	0.10558	0.75113	RNF144A	ring finger protein 144A
3837	0.092169	10787	0.056952	1.6184	0.10558	0.75113	KPNB1	karyopherin subunit beta 1
10184	-0.10562	6810.8	0.065272	-1.6182	0.10562	0.75113	LHFPL2	LHFPL tetraspan subfamily member 2
7539	0.54129	232.05	0.33459	1.6178	0.10571	0.75139	ZFP37	ZFP37 zinc finger protein
113829	-0.17521	2357.8	0.10833	-1.6174	0.10579	0.75158	SLC35A4	solute carrier family 35 member A4
9289	-0.15933	5001	0.098581	-1.6163	0.10604	0.75181	ADGRG1	adhesion G protein-coupled receptor G1
9411	0.095632	13984	0.059171	1.6162	0.10605	0.75181	ARHGAP29	Rho GTPase activating protein 29
29	-0.13465	6820.4	0.083339	-1.6157	0.10615	0.75181	ABR	ABR activator of RhoGEF and GTPase
8131	-0.19252	1950	0.11915	-1.6157	0.10616	0.75181	NPRL3	"NPR3 like, GATOR1 complex subunit"
24138	-0.17152	2369.8	0.10617	-1.6156	0.10619	0.75181	IFIT5	interferon induced protein with tetratricopeptide repeats 5
9949	-0.4918	296.76	0.30453	-1.615	0.10632	0.75181	AMMECR1	AMMECR nuclear protein 1
10217	0.19281	1794	0.1194	1.6148	0.10636	0.75181	CTDSPL	CTD small phosphatase like
54187	-0.19426	1664.6	0.12032	-1.6146	0.10641	0.75181	NANS	N-acetylneuraminate synthase
54461	-0.14303	3811.2	0.088599	-1.6144	0.10644	0.75181	FBXW5	F-box and WD repeat domain containing 5
54499	-0.1649	2237.9	0.10215	-1.6143	0.10647	0.75181	TMCO1	transmembrane and coiled-coil domains 1
51692	0.22523	1175	0.13957	1.6137	0.10659	0.75181	CPSF3	cleavage and polyadenylation specific factor 3
57642	-5.3476	3.3383	3.3141	-1.6136	0.10661	0.75181	COL20A1	collagen type XX alpha 1 chain
4811	0.10954	8877	0.0679	1.6133	0.10668	0.75181	NID1	nidogen 1
441168	-4.8161	5.3991	2.9852	-1.6133	0.10668	0.75181	CALHM6	calcium homeostasis modulator family member 6
5498	0.36655	646.12	0.22724	1.613	0.10674	0.75181	PPOX	protoporphyrinogen oxidase
151888	-4.7939	5.5656	2.972	-1.613	0.10674	0.75181	BTLA	B and T lymphocyte associated
497190	1.4118	34.901	0.87546	1.6127	0.10681	0.75181	CLEC18B	C-type lectin domain family 18 member B
255783	-0.52645	280.93	0.3265	-1.6124	0.10687	0.75181	INAFM1	InaF motif containing 1
132332	3.6393	8.2215	2.2576	1.612	0.10696	0.75181	TMEM155	transmembrane protein 155
55654	-0.13388	5623.9	0.083061	-1.6118	0.10701	0.75181	TMEM127	transmembrane protein 127
3846	-3.9637	6.9774	2.4605	-1.6109	0.10719	0.75181	KRTAP5-9	keratin associated protein 5-9
727957	0.13734	5252.6	0.085278	1.6105	0.10729	0.75181	MROH1	maestro heat like repeat family member 1
3831	0.10185	11283	0.063245	1.6105	0.1073	0.75181	KLC1	kinesin light chain 1
27124	0.78744	100.54	0.48896	1.6104	0.1073	0.75181	INPP5J	inositol polyphosphate-5-phosphatase J
54872	0.13713	3747.8	0.085159	1.6103	0.10733	0.75181	PIGG	phosphatidylinositol glycan anchor biosynthesis class G
192669	0.17372	2535.1	0.10789	1.6102	0.10736	0.75181	AGO3	argonaute RISC catalytic component 3
5783	0.48613	247.43	0.30197	1.6099	0.10743	0.75181	PTPN13	protein tyrosine phosphatase non-receptor type 13
2643	-0.35433	554.45	0.22013	-1.6096	0.10747	0.75181	GCH1	GTP cyclohydrolase 1
341640	-2.7508	10.199	1.7093	-1.6093	0.10755	0.75181	FREM2	FRAS1 related extracellular matrix 2
5934	0.16756	2690.9	0.10416	1.6086	0.10769	0.75181	RBL2	RB transcriptional corepressor like 2
10124	-0.39794	495.97	0.24741	-1.6084	0.10774	0.75181	ARL4A	ADP ribosylation factor like GTPase 4A
54806	0.24782	1100.5	0.15411	1.608	0.10783	0.75181	AHI1	Abelson helper integration site 1
8703	-0.25141	1314.7	0.15636	-1.6079	0.10786	0.75181	B4GALT3	"beta-1,4-galactosyltransferase 3"
60481	0.20967	3426	0.1304	1.6078	0.10787	0.75181	ELOVL5	ELOVL fatty acid elongase 5
347735	-0.21956	1667.5	0.13659	-1.6074	0.10796	0.75181	SERINC2	serine incorporator 2
3858	0.27423	800.53	0.17062	1.6073	0.10799	0.75181	KRT10	keratin 10
84287	-0.22359	1780.7	0.13911	-1.6072	0.108	0.75181	ZDHHC16	zinc finger DHHC-type palmitoyltransferase 16
54991	0.31742	636.63	0.19752	1.607	0.10806	0.75181	C1orf159	chromosome 1 open reading frame 159
384	-0.57189	171.65	0.3559	-1.6069	0.10807	0.75181	ARG2	arginase 2
79443	0.14439	4710.1	0.089856	1.6069	0.10808	0.75181	FYCO1	FYVE and coiled-coil domain autophagy adaptor 1
84765	0.34503	606.98	0.21476	1.6066	0.10815	0.75185	ZNF577	zinc finger protein 577
90806	0.29104	997.39	0.18118	1.6064	0.10819	0.75185	ANGEL2	angel homolog 2
55839	-0.34686	542.44	0.21602	-1.6057	0.10834	0.7524	CENPN	centromere protein N
2533	-4.6457	5.5767	2.8939	-1.6053	0.10842	0.7524	FYB1	FYN binding protein 1
10402	0.16208	2927	0.10098	1.6051	0.10848	0.7524	ST3GAL6	"ST3 beta-galactoside alpha-2,3-sialyltransferase 6"
3703	-0.12754	6731.5	0.079465	-1.605	0.1085	0.7524	STT3A	STT3 oligosaccharyltransferase complex catalytic subunit A
2627	-0.27054	932.34	0.16864	-1.6043	0.10866	0.75252	GATA6	GATA binding protein 6
85417	-0.93679	71.276	0.5841	-1.6038	0.10875	0.75252	CCNB3	cyclin B3
5782	0.12059	6022.9	0.075196	1.6036	0.10879	0.75252	PTPN12	protein tyrosine phosphatase non-receptor type 12
93134	0.19578	1738.6	0.12209	1.6036	0.10881	0.75252	ZNF561	zinc finger protein 561
64747	-0.14512	3115.2	0.090526	-1.6031	0.10891	0.75252	MFSD1	major facilitator superfamily domain containing 1
2539	-0.14035	4950.4	0.087555	-1.603	0.10894	0.75252	G6PD	glucose-6-phosphate dehydrogenase
333	0.46624	366.19	0.29088	1.6029	0.10896	0.75252	APLP1	amyloid beta precursor like protein 1
83858	0.20012	2214.2	0.12486	1.6027	0.109	0.75252	ATAD3B	ATPase family AAA domain containing 3B
83439	-0.21542	1348.1	0.13442	-1.6026	0.10902	0.75252	TCF7L1	transcription factor 7 like 1
25832	0.25454	1368.6	0.15889	1.602	0.10916	0.75268	NBPF14	NBPF member 14
81875	-0.28095	1057.5	0.17538	-1.602	0.10916	0.75268	ISG20L2	interferon stimulated exonuclease gene 20 like 2
121260	-0.21417	1685	0.13379	-1.6008	0.10943	0.75358	SLC15A4	solute carrier family 15 member 4
6416	0.20889	1366.1	0.1305	1.6007	0.10945	0.75358	MAP2K4	mitogen-activated protein kinase kinase 4
23428	0.76324	110.98	0.47695	1.6003	0.10954	0.75358	SLC7A8	solute carrier family 7 member 8
54344	-0.39786	480.76	0.24867	-1.5999	0.10961	0.75358	DPM3	"dolichyl-phosphate mannosyltransferase subunit 3, regulatory"
43847	-5.3477	4.8219	3.3427	-1.5998	0.10964	0.75358	KLK14	kallikrein related peptidase 14
10903	0.26913	1044	0.16831	1.599	0.10982	0.75358	MTMR11	myotubularin related protein 11
79624	0.22498	1104	0.1407	1.599	0.10983	0.75358	ARMT1	acidic residue methyltransferase 1
7763	0.11513	7358.7	0.072012	1.5988	0.10987	0.75358	ZFAND5	zinc finger AN1-type containing 5
6944	-0.19928	1424.9	0.12465	-1.5987	0.10989	0.75358	VPS72	vacuolar protein sorting 72 homolog
51098	-0.29051	758.08	0.18174	-1.5985	0.10993	0.75358	IFT52	intraflagellar transport 52
121504	1.2532	37.865	0.78402	1.5984	0.10995	0.75358	H4-16	H4 histone 16
8817	4.945	6.9373	3.0939	1.5983	0.10997	0.75358	FGF18	fibroblast growth factor 18
2029	-0.1375	3575.8	0.086062	-1.5977	0.11011	0.75402	ENSA	endosulfine alpha
147906	0.55434	194.9	0.34699	1.5975	0.11014	0.75402	DACT3	dishevelled binding antagonist of beta catenin 3
51142	-0.12585	6160.8	0.078791	-1.5972	0.11022	0.75417	CHCHD2	coiled-coil-helix-coiled-coil-helix domain containing 2
58191	-0.2129	1488.7	0.1334	-1.596	0.11049	0.75515	CXCL16	C-X-C motif chemokine ligand 16
23256	0.17639	2183.3	0.11054	1.5957	0.11056	0.75515	SCFD1	sec1 family domain containing 1
2787	-0.16726	2989.1	0.10483	-1.5955	0.11061	0.75515	GNG5	G protein subunit gamma 5
140876	-0.60632	149.49	0.38006	-1.5953	0.11064	0.75515	RIPOR3	RIPOR family member 3
114789	-0.24336	1030	0.15258	-1.595	0.11072	0.75515	SLC25A25	solute carrier family 25 member 25
84898	2.0281	12.609	1.2716	1.5948	0.11075	0.75515	PLXDC2	plexin domain containing 2
3141	-0.34081	507.59	0.21371	-1.5948	0.11076	0.75515	HLCS	holocarboxylase synthetase
6603	-0.16962	2198.9	0.10638	-1.5944	0.11085	0.75535	SMARCD2	"SWI/SNF related, matrix associated, actin dependent regulator of chromatin, subfamily d, member 2"
79709	-0.090403	12704	0.056718	-1.5939	0.11095	0.75565	COLGALT1	collagen beta(1-O)galactosyltransferase 1
63935	-0.33	840.37	0.20707	-1.5937	0.11101	0.75565	PCIF1	PDX1 C-terminal inhibiting factor 1
57528	0.65261	218.12	0.40964	1.5932	0.11113	0.75609	KCTD16	potassium channel tetramerization domain containing 16
3915	0.076927	30617	0.048295	1.5928	0.1112	0.75612	LAMC1	laminin subunit gamma 1
5042	-1.5283	23.738	0.9596	-1.5926	0.11124	0.75612	PABPC3	poly(A) binding protein cytoplasmic 3
114991	0.18259	2398.9	0.11472	1.5916	0.11147	0.75729	ZNF618	zinc finger protein 618
10494	-0.11984	7186.5	0.07531	-1.5912	0.11156	0.75746	STK25	serine/threonine kinase 25
4205	0.14386	4251.4	0.090454	1.5905	0.11173	0.75772	MEF2A	myocyte enhancer factor 2A
57707	0.19672	1512.8	0.12369	1.5904	0.11174	0.75772	MEAK7	"MTOR associated protein, eak-7 homolog"
55224	-0.30831	750.57	0.1939	-1.5901	0.11181	0.75772	ETNK2	ethanolamine kinase 2
57534	-0.15372	3903.5	0.096683	-1.5899	0.11185	0.75772	MIB1	mindbomb E3 ubiquitin protein ligase 1
8195	-0.30799	903.2	0.19376	-1.5896	0.11194	0.75772	MKKS	McKusick-Kaufman syndrome
6775	1.2263	33.969	0.77148	1.5895	0.11195	0.75772	STAT4	signal transducer and activator of transcription 4
301	-0.082196	18807	0.051718	-1.5893	0.11199	0.75772	ANXA1	annexin A1
102724571	0.46406	288.68	0.29207	1.5889	0.11209	0.75799	LNCTAM34A	long non coding transcriptional activator of miR34a
6330	-4.5793	5.8287	2.883	-1.5884	0.1122	0.75826	SCN4B	sodium voltage-gated channel beta subunit 4
65992	-0.15997	3591.9	0.10073	-1.5882	0.11224	0.75826	DDRGK1	DDRGK domain containing 1
11270	-0.41116	367.28	0.25895	-1.5878	0.11234	0.75852	NRM	nurim
2195	0.86558	100.18	0.5457	1.5862	0.1127	0.76057	FAT1	FAT atypical cadherin 1
10813	-0.24012	1147.3	0.15142	-1.5858	0.11278	0.76073	UTP14A	UTP14A small subunit processome component
643401	0.58117	249.92	0.36666	1.585	0.11296	0.76156	PURPL	p53 upregulated regulator of p53 levels
4194	0.17405	2862.6	0.10989	1.5839	0.11321	0.7629	MDM4	MDM4 regulator of p53
4799	0.17611	2078	0.11122	1.5834	0.11333	0.7631	NFX1	"nuclear transcription factor, X-box binding 1"
4313	-0.090825	20840	0.057365	-1.5833	0.11336	0.7631	MMP2	matrix metallopeptidase 2
9710	0.14023	3385.5	0.08859	1.5829	0.11343	0.7631	KIAA0355	KIAA0355
6645	0.10173	6906.6	0.064275	1.5828	0.11347	0.7631	SNTB2	syntrophin beta 2
7168	-0.090835	9238.4	0.057409	-1.5823	0.11359	0.76353	TPM1	tropomyosin 1
64781	0.1621	5005	0.10251	1.5814	0.11379	0.76408	CERK	ceramide kinase
79804	0.44567	438.67	0.2819	1.5809	0.11389	0.76408	HAND2-AS1	HAND2 antisense RNA 1
84858	-0.38923	395.19	0.24623	-1.5808	0.11393	0.76408	ZNF503	zinc finger protein 503
11245	-0.15717	2785.4	0.099436	-1.5806	0.11396	0.76408	GPR176	G protein-coupled receptor 176
22881	0.46714	262.6	0.29562	1.5802	0.11405	0.76408	ANKRD6	ankyrin repeat domain 6
80331	-0.10591	8804.3	0.06704	-1.5797	0.11416	0.76408	DNAJC5	DnaJ heat shock protein family (Hsp40) member C5
56967	-1.2427	46.43	0.78666	-1.5797	0.11417	0.76408	C14orf132	chromosome 14 open reading frame 132
284361	-0.14929	4101.6	0.094507	-1.5797	0.11417	0.76408	EMC10	ER membrane protein complex subunit 10
5159	-5.2781	4.6172	3.3413	-1.5796	0.11419	0.76408	PDGFRB	platelet derived growth factor receptor beta
54996	0.32986	598.52	0.20888	1.5792	0.11429	0.76439	MTARC2	mitochondrial amidoxime reducing component 2
9308	-0.98624	63.081	0.62477	-1.5786	0.11444	0.76464	CD83	CD83 molecule
[truncated: 11,358 more rows]

## Sheet: T2D-HAEC 0.5Gy vs 0Gy
Table S2. Differentially expressed genes identified in each comparison.
EntrezID	logFC	baseMean	lfcSE	stat	P.Value	adj.P.Val	Symbols	Name
692312	-11.398	322.22	1.4887	-7.6566	1.9097e-14	2.5506e-10	PPAN-P2RY11	PPAN-P2RY11 readthrough
2512	-0.37109	136970	0.051361	-7.2251	5.0058e-13	3.3429e-09	FTL	ferritin light chain
6520	-0.35908	18261	0.051496	-6.9729	3.1047e-12	1.3822e-08	SLC3A2	solute carrier family 3 member 2
3434	-0.50927	5176	0.075774	-6.721	1.8052e-11	6.0274e-08	IFIT1	interferon induced protein with tetratricopeptide repeats 1
4599	-0.35598	22666	0.056156	-6.3391	2.3116e-10	6.1747e-07	MX1	MX dynamin like GTPase 1
4539	-0.42301	59841	0.067996	-6.2211	4.9355e-10	1.0986e-06	MT-ND4L	mitochondrially encoded NADH 4L dehydrogenase
9636	-0.51806	8946.7	0.086645	-5.9791	2.2435e-09	4.2805e-06	ISG15	ISG15 ubiquitin like modifier
3320	-0.27643	30802	0.048048	-5.7533	8.7505e-09	1.4609e-05	HSP90AA1	heat shock protein 90 alpha family class A member 1
4123	0.43628	6605.3	0.078924	5.5278	3.2431e-08	4.3721e-05	MAN2C1	mannosidase alpha class 2C member 1
378706	-1.2818	8402.1	0.23199	-5.5253	3.2883e-08	4.3721e-05	RN7SL2	RNA component of signal recognition particle 7SL2
65123	0.40024	5161	0.072648	5.5094	3.6009e-08	4.3721e-05	INTS3	integrator complex subunit 3
4939	-0.30784	10529	0.056943	-5.406	6.443e-08	7.1711e-05	OAS2	2'-5'-oligoadenylate synthetase 2
6029	-1.2575	7335.7	0.2333	-5.3901	7.043e-08	7.2359e-05	RN7SL1	RNA component of signal recognition particle 7SL1
3303	-0.31064	14705	0.057851	-5.3696	7.8909e-08	7.528e-05	HSPA1A	heat shock protein family A (Hsp70) member 1A
3912	0.27614	42668	0.052172	5.293	1.2032e-07	0.00010713	LAMB1	laminin subunit beta 1
4061	-0.34894	7779.7	0.066767	-5.2262	1.7305e-07	0.00014445	LY6E	lymphocyte antigen 6 family member E
26118	0.38484	23712	0.074143	5.1905	2.0978e-07	0.00016482	WSB1	WD repeat and SOCS box containing 1
387522	-24.586	373.18	4.7852	-5.138	2.7765e-07	0.00020602	TMEM189-UBE2V1	TMEM189-UBE2V1 readthrough
4512	-0.5173	643940	0.10111	-5.1164	3.1135e-07	0.00021886	MT-CO1	mitochondrially encoded cytochrome c oxidase I
113219467	-0.42963	14677	0.085117	-5.0475	4.4768e-07	0.00029896	MIR12136	microRNA 12136
334	0.1961	60375	0.038927	5.0375	4.7163e-07	0.00029996	APLP2	amyloid beta precursor like protein 2
114823	0.29629	14952	0.059188	5.006	5.5581e-07	0.00033742	LENG8	leukocyte receptor cluster member 8
23015	0.44534	5046.5	0.089935	4.9518	7.352e-07	0.00042692	GOLGA8A	golgin A8 family member A
6193	-0.29407	14462	0.060611	-4.8517	1.2238e-06	0.00068105	RPS5	ribosomal protein S5
2537	-0.25964	45448	0.053636	-4.8407	1.2935e-06	0.0006869	IFI6	interferon alpha inducible protein 6
351	0.18364	122680	0.037987	4.8341	1.3372e-06	0.0006869	APP	amyloid beta precursor protein
81669	0.39102	9020.3	0.082433	4.7435	2.1003e-06	0.0010389	CCNL2	cyclin L2
440270	0.47019	3514.7	0.099651	4.7184	2.3771e-06	0.0010963	GOLGA8B	golgin A8 family member B
91543	-0.52706	2099.2	0.11171	-4.7181	2.3803e-06	0.0010963	RSAD2	radical S-adenosyl methionine domain containing 2
55082	0.32383	6978.1	0.071682	4.5176	6.2556e-06	0.002785	ARGLU1	arginine and glutamate rich 1
4513	-0.50631	151140	0.11226	-4.51	6.4836e-06	0.0027934	MT-CO2	mitochondrially encoded cytochrome c oxidase II
2802	0.293	10887	0.065126	4.499	6.8262e-06	0.0028151	GOLGA3	golgin A3
8140	-0.41986	3430.2	0.093404	-4.495	6.9556e-06	0.0028151	SLC7A5	solute carrier family 7 member 5
51433	0.31203	5455.4	0.069872	4.4657	7.9812e-06	0.0031352	ANAPC5	anaphase promoting complex subunit 5
56882	0.366	3890.4	0.08215	4.4553	8.3781e-06	0.0031971	CDC42SE1	CDC42 small effector 1
135	2.3137	1081.6	0.52143	4.4373	9.1084e-06	0.0033792	ADORA2A	adenosine A2a receptor
51296	-0.62764	1688.3	0.14166	-4.4305	9.401e-06	0.0033935	SLC15A3	solute carrier family 15 member 3
23218	0.35379	5528.2	0.080012	4.4218	9.7882e-06	0.0034292	NBEAL2	neurobeachin like 2
2495	-0.20519	258330	0.046457	-4.4169	1.0013e-05	0.0034292	FTH1	ferritin heavy chain 1
22985	0.2635	12119	0.059903	4.3987	1.089e-05	0.0036363	ACIN1	apoptotic chromatin condensation inducer 1
80279	0.43222	3094.1	0.098681	4.3799	1.1872e-05	0.0038117	CDK5RAP3	CDK5 regulatory subunit associated protein 3
4514	-0.51648	173600	0.11798	-4.3778	1.1987e-05	0.0038117	MT-CO3	mitochondrially encoded cytochrome c oxidase III
378707	-1.3173	314.95	0.30214	-4.3598	1.3017e-05	0.0040433	RN7SL3	RNA component of signal recognition particle 7SL3
7009	-0.20626	28798	0.047581	-4.3349	1.4584e-05	0.004323	TMBIM6	transmembrane BAX inhibitor motif containing 6
23451	0.27918	13791	0.064444	4.3322	1.4765e-05	0.004323	SF3B1	splicing factor 3b subunit 1
83985	-0.64435	3332.1	0.1488	-4.3303	1.4889e-05	0.004323	SPNS1	sphingolipid transporter 1 (putative)
79661	0.57709	1294.4	0.13446	4.2918	1.7722e-05	0.0050361	NEIL1	nei like DNA glycosylase 1
3162	-0.23033	40141	0.05407	-4.2598	2.0463e-05	0.0056939	HMOX1	heme oxygenase 1
50809	0.29299	7586.3	0.068884	4.2533	2.106e-05	0.0057403	HP1BP3	heterochromatin protein 1 binding protein 3
3791	0.17134	34533	0.04038	4.2432	2.204e-05	0.0058873	KDR	kinase insert domain receptor
89849	0.45323	3038.9	0.10705	4.2338	2.2978e-05	0.0060174	ATG16L2	autophagy related 16 like 2
378938	-0.21676	107700	0.051529	-4.2066	2.5925e-05	0.0066588	MALAT1	metastasis associated lung adenocarcinoma transcript 1
1636	0.44847	2106.8	0.10695	4.1932	2.75e-05	0.0069301	ACE	angiotensin I converting enzyme
11082	0.26668	49330	0.063796	4.1801	2.9134e-05	0.0071832	ESM1	endothelial cell specific molecule 1
3304	-0.27742	13635	0.066421	-4.1767	2.958e-05	0.0071832	HSPA1B	heat shock protein family A (Hsp70) member 1B
23334	0.3381	5309.1	0.081311	4.1581	3.2097e-05	0.007597	SZT2	SZT2 subunit of KICSTOR complex
64399	0.19094	33251	0.045945	4.1558	3.2422e-05	0.007597	HHIP	hedgehog interacting protein
5797	0.31075	7624.9	0.075053	4.1404	3.4671e-05	0.0079839	PTPRM	protein tyrosine phosphatase receptor type M
2014	-0.47459	2933.9	0.11491	-4.1301	3.6255e-05	0.0081417	EMP3	epithelial membrane protein 3
10521	0.24274	26691	0.058803	4.1281	3.6576e-05	0.0081417	DDX17	DEAD-box helicase 17
10984	-0.96978	538.91	0.23541	-4.1196	3.7952e-05	0.0083097	KCNQ1OT1	KCNQ1 opposite strand/antisense transcript 1
57704	0.38465	2867.2	0.093864	4.0979	4.1685e-05	0.0089798	GBA2	glucosylceramidase beta 2
57761	-0.31309	5763.3	0.076563	-4.0894	4.3254e-05	0.00917	TRIB3	tribbles pseudokinase 3
3329	-0.24539	9467.8	0.060241	-4.0735	4.6318e-05	0.0096659	HSPD1	heat shock protein family D (Hsp60) member 1
1305	0.25602	7073.3	0.063218	4.0498	5.1251e-05	0.010531	COL13A1	collagen type XIII alpha 1 chain
6558	0.28395	15369	0.070515	4.0268	5.6536e-05	0.011441	SLC12A2	solute carrier family 12 member 2
8878	-0.18251	71762	0.045365	-4.0232	5.7414e-05	0.011445	SQSTM1	sequestosome 1
442524	7.3951	16.06	1.8429	4.0127	6.0033e-05	0.011604	DPY19L2P3	DPY19L2 pseudogene 3
967	-0.23671	47580	0.059009	-4.0115	6.0339e-05	0.011604	CD63	CD63 molecule
1295	0.14776	48794	0.036864	4.0081	6.1197e-05	0.011604	COL8A1	collagen type VIII alpha 1 chain
10493	-0.26665	34772	0.066558	-4.0063	6.1689e-05	0.011604	VAT1	vesicle amine transport 1
9246	-0.30869	4678.5	0.077132	-4.0022	6.2769e-05	0.011644	UBE2L6	ubiquitin conjugating enzyme E2 L6
2879	-0.29055	10908	0.072683	-3.9976	6.3998e-05	0.011709	GPX4	glutathione peroxidase 4
286749	-8.0908	15.803	2.0351	-3.9757	7.018e-05	0.012613	STON1-GTF2A1L	STON1-GTF2A1L readthrough
3915	0.19175	30617	0.048258	3.9735	7.0826e-05	0.012613	LAMC1	laminin subunit gamma 1
3430	-0.44251	2146.2	0.11163	-3.9643	7.3627e-05	0.012939	IFI35	interferon induced protein 35
6625	0.30092	15179	0.076059	3.9564	7.609e-05	0.013198	SNRNP70	small nuclear ribonucleoprotein U1 subunit 70
4508	-0.43319	198490	0.11051	-3.9198	8.8607e-05	0.015172	MT-ATP6	mitochondrially encoded ATP synthase 6
440	-0.4579	3468.7	0.11696	-3.915	9.0409e-05	0.015285	ASNS	asparagine synthetase (glutamine-hydrolyzing)
1282	0.17929	57987	0.04595	3.9019	9.5456e-05	0.015936	COL4A1	collagen type IV alpha 1 chain
7082	0.28333	6363.7	0.072875	3.8879	0.00010113	0.016586	TJP1	tight junction protein 1
7453	-0.1894	21005	0.048773	-3.8833	0.00010303	0.016586	WARS1	tryptophanyl-tRNA synthetase 1
3910	0.18737	34859	0.048252	3.8832	0.00010307	0.016586	LAMA4	laminin subunit alpha 4
390	-0.2616	6089.1	0.067611	-3.8691	0.00010923	0.017367	RND3	Rho family GTPase 3
26115	0.49206	1600.9	0.12743	3.8615	0.00011271	0.017572	TANC2	"tetratricopeptide repeat, ankyrin repeat and coiled-coil containing 2"
26140	0.37667	3461.8	0.09757	3.8605	0.00011315	0.017572	TTLL3	tubulin tyrosine ligase like 3
8515	0.25634	8265.8	0.066597	3.849	0.00011858	0.018204	ITGA10	integrin subunit alpha 10
647979	0.27883	18824	0.07257	3.8423	0.00012189	0.0185	NORAD	non-coding RNA activated by DNA damage
388115	0.32149	4791.9	0.083763	3.8381	0.00012398	0.018605	CCDC9B	coiled-coil domain containing 9B
929	-7.1048	15.927	1.8542	-3.8317	0.00012724	0.018882	CD14	CD14 molecule
9588	-0.32002	5352.7	0.083604	-3.8279	0.00012926	0.018943	PRDX6	peroxiredoxin 6
6894	0.55313	1720.4	0.14468	3.8232	0.00013174	0.018943	TARBP1	TAR (HIV-1) RNA binding protein 1
5204	-0.35048	3531.2	0.091679	-3.8229	0.0001319	0.018943	PFDN5	prefoldin subunit 5
57412	-7.5363	24.236	1.9825	-3.8014	0.00014391	0.020447	AS3MT	arsenite methyltransferase
4519	-0.49987	167950	0.13222	-3.7806	0.00015643	0.021992	MT-CYB	mitochondrially encoded cytochrome b
64332	0.3366	3617.7	0.089658	3.7543	0.00017386	0.024188	NFKBIZ	NFKB inhibitor zeta
3655	0.29079	4259.9	0.077576	3.7485	0.00017791	0.024496	ITGA6	integrin subunit alpha 6
284058	-0.32223	4546.8	0.086148	-3.7405	0.00018368	0.025033	KANSL1	KAT8 regulatory NSL complex subunit 1
828	0.9429	347.78	0.25278	3.7302	0.00019135	0.025815	CAPS	calcyphosine
23162	0.27589	9086.5	0.07449	3.7038	0.00021242	0.028371	MAPK8IP3	mitogen-activated protein kinase 8 interacting protein 3
633	-0.303	5007	0.081988	-3.6957	0.00021926	0.028995	BGN	biglycan
51351	0.31123	13762	0.084515	3.6825	0.00023096	0.030242	ZNF117	zinc finger protein 117
6711	0.19762	39682	0.053766	3.6755	0.00023742	0.030786	SPTBN1	"spectrin beta, non-erythrocytic 1"
1953	0.37012	4253.2	0.1009	3.6682	0.00024424	0.031366	MEGF6	multiple EGF like domains 6
55959	0.1581	38186	0.043187	3.6609	0.00025136	0.031974	SULF2	sulfatase 2
7071	-0.277	4946	0.075735	-3.6575	0.00025473	0.032026	KLF10	Kruppel like factor 10
65975	6.902	15.734	1.8881	3.6556	0.00025657	0.032026	STK33	serine/threonine kinase 33
2617	-0.1894	14137	0.052033	-3.64	0.00027268	0.033514	GARS1	glycyl-tRNA synthetase 1
125050	-1.3309	3755	0.3657	-3.6392	0.00027351	0.033514	RN7SK	RNA component of 7SK nuclear ribonucleoprotein
6498	0.32644	4993.1	0.090006	3.6268	0.00028691	0.034836	SKIL	SKI like proto-oncogene
23215	0.20688	14144	0.057197	3.617	0.00029803	0.03586	PRRC2C	proline rich coiled-coil 2C
11337	-0.22198	8932	0.061466	-3.6114	0.0003046	0.03602	GABARAP	GABA type A receptor-associated protein
7284	-0.29547	6148.1	0.081836	-3.6106	0.00030553	0.03602	TUFM	"Tu translation elongation factor, mitochondrial"
25939	-0.24563	8259.4	0.06817	-3.6032	0.00031427	0.03602	SAMHD1	SAM and HD domain containing deoxynucleoside triphosphate triphosphohydrolase 1
667	0.19067	26080	0.052935	3.6021	0.00031571	0.03602	DST	dystonin
3921	-0.19766	17835	0.054877	-3.6018	0.00031604	0.03602	RPSA	ribosomal protein SA
10957	-0.28442	3872.3	0.079002	-3.6002	0.00031801	0.03602	PNRC1	proline rich nuclear receptor coactivator 1
10482	0.33492	4568.4	0.093034	3.6	0.00031823	0.03602	NXF1	nuclear RNA export factor 1
60677	-4.6934	136.89	1.311	-3.58	0.00034362	0.038567	CELF6	CUGBP Elav-like family member 6
65981	0.36612	2441.9	0.10247	3.5729	0.00035298	0.039287	CAPRIN2	caprin family member 2
339541	6.5172	19.778	1.8284	3.5644	0.00036465	0.04025	ARMH1	armadillo like helical domain containing 1
123096	0.24808	7773.4	0.070007	3.5436	0.00039475	0.043215	SLC25A29	solute carrier family 25 member 29
55075	0.27091	6431	0.076595	3.537	0.00040473	0.043948	UACA	uveal autoantigen with coiled-coil domains and ankyrin repeats
64834	-0.34045	3795.3	0.096334	-3.5341	0.0004092	0.044075	ELOVL1	ELOVL fatty acid elongase 1
3191	0.25098	6417.1	0.071143	3.5278	0.00041904	0.044434	HNRNPL	heterogeneous nuclear ribonucleoprotein L
3159	-0.19844	31265	0.056252	-3.5277	0.00041919	0.044434	HMGA1	high mobility group AT-hook 1
654364	-0.70853	1623.5	0.20132	-3.5195	0.00043242	0.045476	NME1-NME2	NME1-NME2 readthrough
9295	0.25806	8905.9	0.073393	3.5161	0.00043789	0.045691	SRSF11	serine and arginine rich splicing factor 11
80162	0.40232	2486.9	0.11522	3.4918	0.00047979	0.049357	PGGHG	protein-glucosylgalactosylhydroxylysine glucosidase
92949	0.46776	1645.4	0.13397	3.4914	0.00048041	0.049357	ADAMTSL1	ADAMTS like 1
3956	-0.22818	30706	0.065416	-3.4882	0.0004863	0.049421	LGALS1	galectin 1
56971	0.52057	1010.3	0.14929	3.487	0.00048844	0.049421	CEACAM19	CEA cell adhesion molecule 19
84129	0.58298	1473.3	0.16739	3.4827	0.00049632	0.049841	ACAD11	acyl-CoA dehydrogenase family member 11
5270	-0.24539	7555.3	0.070665	-3.4726	0.00051546	0.051376	SERPINE2	serpin family E member 2
7508	0.30829	4346.4	0.088837	3.4702	0.00052	0.051446	XPC	"XPC complex subunit, DNA damage recognition and repair factor"
56917	-6.7523	12.504	1.948	-3.4662	0.00052781	0.051834	MEIS3	Meis homeobox 3
4536	-0.44244	105650	0.12799	-3.4569	0.00054634	0.053262	MT-ND2	mitochondrially encoded NADH dehydrogenase 2
64221	0.4564	1468.3	0.1322	3.4524	0.00055564	0.053539	ROBO3	roundabout guidance receptor 3
29968	-0.26814	4405.4	0.077697	-3.4511	0.00055833	0.053539	PSAT1	phosphoserine aminotransferase 1
22795	0.264	11034	0.076545	3.449	0.00056277	0.053539	NID2	nidogen 2
9124	-0.25059	5571.1	0.072694	-3.4472	0.00056652	0.053539	PDLIM1	PDZ and LIM domain 1
8641	-0.84973	1017.2	0.24659	-3.4459	0.00056923	0.053539	PCDHGB4	"protocadherin gamma subfamily B, 4"
23213	-7.3317	10.022	2.1312	-3.4401	0.00058148	0.054309	SULF1	sulfatase 1
3310	-0.34551	2378.8	0.10055	-3.4363	0.00058977	0.054592	HSPA6	heat shock protein family A (Hsp70) member 6
22913	-0.28386	5597.4	0.082639	-3.4349	0.00059268	0.054592	RALY	RALY heterogeneous nuclear ribonucleoprotein
7297	0.32851	4436.9	0.095763	3.4304	0.00060266	0.055131	TYK2	tyrosine kinase 2
23521	-0.1517	50572	0.044293	-3.4249	0.0006151	0.055354	RPL13A	ribosomal protein L13a
682	-0.19657	28644	0.057405	-3.4242	0.00061665	0.055354	BSG	basigin (Ok blood group)
90990	0.45887	2300.7	0.13402	3.4238	0.00061754	0.055354	KIFC2	kinesin family member C2
9514	-6.8992	11.382	2.0225	-3.4112	0.00064673	0.05744	GAL3ST1	galactose-3-O-sulfotransferase 1
93663	0.25333	4801.9	0.074289	3.4101	0.0006494	0.05744	ARHGAP18	Rho GTPase activating protein 18
1509	-0.22981	29985	0.067452	-3.407	0.00065685	0.057716	CTSD	cathepsin D
6137	-0.22269	26942	0.065481	-3.4009	0.00067173	0.058638	RPL13	ribosomal protein L13
3429	-0.20232	45126	0.059609	-3.3941	0.00068852	0.059388	IFI27	interferon alpha inducible protein 27
4535	-0.43158	133180	0.12717	-3.3938	0.00068921	0.059388	MT-ND1	mitochondrially encoded NADH dehydrogenase 1
5714	-0.26445	5430.8	0.077982	-3.3912	0.00069587	0.059515	PSMD8	"proteasome 26S subunit, non-ATPase 8"
54852	-6.793	12.463	2.0043	-3.3891	0.00070112	0.059515	PAQR5	progestin and adipoQ receptor family member 5
26135	-0.20808	10358	0.061417	-3.388	0.00070405	0.059515	SERBP1	SERPINE1 mRNA binding protein 1
1499	0.17077	16340	0.05052	3.3802	0.00072442	0.060838	CTNNB1	catenin beta 1
285513	1.5201	136.75	0.44993	3.3785	0.00072881	0.060838	GPRIN3	GPRIN family member 3
57823	-6.6635	11.585	1.9734	-3.3766	0.0007338	0.060874	SLAMF7	SLAM family member 7
7384	-0.27821	4149.5	0.082445	-3.3745	0.00073952	0.060969	UQCRC1	ubiquinol-cytochrome c reductase core protein 1
100288332	0.61581	715.26	0.18285	3.3678	0.00075778	0.061813	NPIPA5	nuclear pore complex interacting protein family member A5
155038	0.37129	2086.2	0.11026	3.3673	0.00075902	0.061813	GIMAP8	"GTPase, IMAP family member 8"
4897	0.18671	16986	0.055521	3.3629	0.00077142	0.062443	NRCAM	neuronal cell adhesion molecule
4537	-0.54675	38181	0.16345	-3.3451	0.0008224	0.066169	MT-ND3	mitochondrially encoded NADH dehydrogenase 3
3551	0.26992	3976	0.08078	3.3414	0.00083363	0.066646	IKBKB	inhibitor of nuclear factor kappa B kinase subunit beta
79852	6.7594	11.735	2.0239	3.3398	0.00083831	0.066646	EPHX3	epoxide hydrolase 3
286006	2.0677	72.598	0.61949	3.3378	0.0008446	0.066711	LSMEM1	leucine rich single-pass membrane protein 1
256364	0.29575	3553.8	0.088647	3.3363	0.00084912	0.066711	EML3	EMAP like 3
10628	-0.22113	7335.9	0.066371	-3.3317	0.00086308	0.067309	TXNIP	thioredoxin interacting protein
54539	-0.46935	1577.6	0.14092	-3.3305	0.00086681	0.067309	NDUFB11	NADH:ubiquinone oxidoreductase subunit B11
5411	0.26684	5341.3	0.080492	3.3151	0.00091616	0.070729	PNN	"pinin, desmosome associated protein"
8720	0.19415	9848.8	0.058605	3.3128	0.00092358	0.070893	MBTPS1	"membrane bound transcription factor peptidase, site 1"
1978	-0.43468	2405.8	0.13149	-3.3058	0.0009471	0.072282	EIF4EBP1	eukaryotic translation initiation factor 4E binding protein 1
57670	0.53489	942.66	0.16213	3.2991	0.00097003	0.073612	KIAA1549	KIAA1549
4489	-7.093	10.901	2.1542	-3.2927	0.00099247	0.074874	MT1A	metallothionein 1A
7417	-0.24445	4942.9	0.074274	-3.2911	0.00099787	0.074874	VDAC2	voltage dependent anion channel 2
221395	0.14867	19761	0.045218	3.2879	0.0010095	0.075324	ADGRF5	adhesion G protein-coupled receptor F5
6687	0.19559	10559	0.059526	3.2858	0.001017	0.07546	SPG7	"SPG7 matrix AAA peptidase subunit, paraplegin"
51332	0.30753	3452.2	0.093832	3.2774	0.0010476	0.077301	SPTBN5	"spectrin beta, non-erythrocytic 5"
206338	-6.9358	16.408	2.1208	-3.2704	0.0010741	0.07882	LVRN	laeverin
8701	0.77697	410.46	0.23773	3.2683	0.001082	0.078968	DNAH11	dynein axonemal heavy chain 11
11064	0.63792	715.66	0.19543	3.2641	0.0010979	0.079696	CNTRL	centriolin
3384	-0.21964	10785	0.067354	-3.261	0.0011103	0.080161	ICAM2	intercellular adhesion molecule 2
3187	0.26804	15141	0.082263	3.2583	0.0011209	0.080371	HNRNPH1	heterogeneous nuclear ribonucleoprotein H1
51005	0.32442	3010.8	0.099603	3.2572	0.0011253	0.080371	AMDHD2	amidohydrolase domain containing 2
6142	-0.19349	20266	0.059755	-3.238	0.0012039	0.085367	RPL18A	ribosomal protein L18a
4815	-6.9871	12.262	2.1594	-3.2356	0.0012137	0.085367	NINJ2	ninjurin 2
9987	0.23801	7520.1	0.073589	3.2343	0.0012195	0.085367	HNRNPDL	heterogeneous nuclear ribonucleoprotein D like
54540	0.33071	2451.7	0.10226	3.234	0.0012208	0.085367	FAM193B	family with sequence similarity 193 member B
8906	0.52645	947.59	0.16291	3.2315	0.0012314	0.085658	AP1G2	adaptor related protein complex 1 subunit gamma 2
1019	-0.28663	4422.3	0.089162	-3.2147	0.0013057	0.090359	CDK4	cyclin dependent kinase 4
114821	-6.4436	11.105	2.0092	-3.207	0.0013413	0.091461	ZBED9	zinc finger BED-type containing 9
6209	-0.20931	12186	0.065279	-3.2064	0.0013439	0.091461	RPS15	ribosomal protein S15
51398	-0.7624	874.8	0.2379	-3.2048	0.0013516	0.091461	WDR83OS	WD repeat domain 83 opposite strand
54923	0.65953	630.65	0.20581	3.2045	0.001353	0.091461	LIME1	Lck interacting transmembrane adaptor 1
7786	0.3931	2182.5	0.12277	3.2018	0.0013657	0.091461	MAP3K12	mitogen-activated protein kinase kinase kinase 12
259282	0.25464	5026.1	0.079538	3.2014	0.0013675	0.091461	BOD1L1	biorientation of chromosomes in cell division 1 like 1
6708	1.2054	208.67	0.37658	3.201	0.0013696	0.091461	SPTA1	"spectrin alpha, erythrocytic 1"
90441	-0.34854	2211.7	0.10902	-3.1972	0.0013876	0.092205	ZNF622	zinc finger protein 622
467	-0.26138	4667.6	0.0818	-3.1954	0.0013966	0.092339	ATF3	activating transcription factor 3
23199	0.4808	1232.7	0.15074	3.1896	0.0014246	0.093727	GSE1	Gse1 coiled-coil protein
1440	0.26399	6005.1	0.082858	3.186	0.0014423	0.094429	CSF3	colony stimulating factor 3
135228	0.21928	8960.1	0.069067	3.1749	0.001499	0.09766	CD109	CD109 molecule
153830	0.41323	3094.9	0.13026	3.1723	0.0015122	0.098044	RNF145	ring finger protein 145
55602	-0.59644	757.4	0.18817	-3.1697	0.0015259	0.098456	CDKN2AIP	CDKN2A interacting protein
1003	0.13647	68638	0.043099	3.1664	0.0015435	0.099111	CDH5	cadherin 5
5359	-0.23728	5030.4	0.074975	-3.1648	0.0015519	0.099173	PLSCR1	phospholipid scramblase 1
5066	0.16028	15173	0.050838	3.1528	0.001617	0.10284	PAM	peptidylglycine alpha-amidating monooxygenase
10336	0.24431	4210.5	0.077569	3.1496	0.0016348	0.10348	PCGF3	polycomb group ring finger 3
5447	-0.36517	2335.5	0.11604	-3.147	0.0016493	0.10361	POR	cytochrome p450 oxidoreductase
9538	-0.27051	4877.9	0.085977	-3.1463	0.0016532	0.10361	EI24	EI24 autophagy associated transmembrane protein
10797	-0.25801	4582.3	0.082034	-3.1451	0.0016602	0.10361	MTHFD2	"methylenetetrahydrofolate dehydrogenase (NADP+ dependent) 2, methenyltetrahydrofolate cyclohydrolase"
4733	-0.37114	1960.1	0.11809	-3.1427	0.001674	0.10399	DRG1	developmentally regulated GTP binding protein 1
5362	0.21611	20027	0.068802	3.141	0.0016839	0.10412	PLXNA2	plexin A2
1192	-0.22761	10757	0.072755	-3.1285	0.0017572	0.10787	CLIC1	chloride intracellular channel 1
2907	-0.23508	10514	0.075193	-3.1264	0.0017696	0.10787	GRINA	glutamate ionotropic receptor NMDA type subunit associated protein 1
90865	0.39591	1745	0.12672	3.1242	0.001783	0.10787	IL33	interleukin 33
6223	-0.18815	31049	0.06023	-3.1239	0.0017849	0.10787	RPS19	ribosomal protein S19
6222	-0.18497	29012	0.059213	-3.1239	0.001785	0.10787	RPS18	ribosomal protein S18
10399	-0.16847	29482	0.054004	-3.1196	0.001811	0.10887	RACK1	receptor for activated C kinase 1
23166	0.21977	12964	0.070474	3.1185	0.0018177	0.10887	STAB1	stabilin 1
4131	0.20506	24272	0.065859	3.1136	0.001848	0.11019	MAP1B	microtubule associated protein 1B
126328	-0.31037	3362.7	0.099821	-3.1093	0.0018754	0.11132	NDUFA11	NADH:ubiquinone oxidoreductase subunit A11
56100	-1.2116	271.56	0.39033	-3.1042	0.0019082	0.11277	PCDHGB6	"protocadherin gamma subfamily B, 6"
6469	5.9896	16.121	1.9309	3.1021	0.0019218	0.11307	SHH	sonic hedgehog signaling molecule
196883	0.31082	2740.2	0.10038	3.0964	0.0019586	0.11437	ADCY4	adenylate cyclase 4
388341	-1.2558	185.45	0.40566	-3.0957	0.0019635	0.11437	LRRC75A	leucine rich repeat containing 75A
644100	6.4055	10.358	2.07	3.0945	0.0019716	0.11437	ARL14EPL	ADP ribosylation factor like GTPase 14 effector protein like
10567	-0.30415	4348.1	0.098319	-3.0935	0.0019782	0.11437	RABAC1	Rab acceptor 1
8473	0.24862	12797	0.080446	3.0905	0.0019981	0.11503	OGT	O-linked N-acetylglucosamine (GlcNAc) transferase
66000	-6.6552	10.37	2.1612	-3.0794	0.0020744	0.11891	TMEM108	transmembrane protein 108
7450	0.15705	92314	0.05113	3.0716	0.0021289	0.12151	VWF	von Willebrand factor
1603	-0.23616	5250.9	0.076922	-3.0702	0.0021394	0.12151	DAD1	defender against cell death 1
1388	0.27377	3384.6	0.089261	3.067	0.0021619	0.12151	ATF6B	activating transcription factor 6 beta
50488	0.18421	9580.1	0.060064	3.0669	0.0021628	0.12151	MINK1	misshapen like kinase 1
25897	0.26486	4330.4	0.086371	3.0666	0.0021652	0.12151	RNF19A	"ring finger protein 19A, RBR E3 ubiquitin protein ligase"
8237	-0.41453	1388	0.13575	-3.0537	0.0022605	0.1263	USP11	ubiquitin specific peptidase 11
8506	0.22396	6628.3	0.073369	3.0525	0.0022695	0.1263	CNTNAP1	contactin associated protein 1
110599564	-1.4616	124.29	0.47914	-3.0505	0.0022847	0.12662	EEF1AKMT4	EEF1A lysine methyltransferase 4
1690	-6.6488	9.3892	2.1823	-3.0467	0.0023135	0.12768	COCH	cochlin
1564	1.7964	86.142	0.59078	3.0407	0.0023606	0.12974	CYP2D7	cytochrome P450 family 2 subfamily D member 7 (gene/pseudogene)
89872	-6.6184	14.658	2.1834	-3.0312	0.002436	0.13334	AQP10	aquaporin 10
402	-0.40942	2645.1	0.13531	-3.0258	0.0024797	0.13494	ARL2	ADP ribosylation factor like GTPase 2
7059	0.41527	1410.9	0.13737	3.0231	0.0025022	0.13494	THBS3	thrombospondin 3
64750	0.19943	13779	0.065973	3.0229	0.0025034	0.13494	SMURF2	SMAD specific E3 ubiquitin protein ligase 2
226	-0.16609	48403	0.054966	-3.0217	0.0025133	0.13494	ALDOA	"aldolase, fructose-bisphosphate A"
85301	0.22794	5849.6	0.075462	3.0206	0.0025228	0.13494	COL27A1	collagen type XXVII alpha 1 chain
79144	-0.25993	3829.8	0.086064	-3.0202	0.0025259	0.13494	PPDPF	pancreatic progenitor cell differentiation and proliferation factor
56099	-0.51336	1485.4	0.17022	-3.0159	0.0025623	0.13601	PCDHGB7	"protocadherin gamma subfamily B, 7"
23125	0.26457	3821.8	0.087739	3.0154	0.0025663	0.13601	CAMTA2	calmodulin binding transcription activator 2
8428	-0.27866	3852.4	0.092502	-3.0125	0.0025911	0.13679	STK24	serine/threonine kinase 24
6430	0.29975	8199.2	0.09964	3.0084	0.0026267	0.13812	SRSF5	serine and arginine rich splicing factor 5
126208	-0.4362	1389.4	0.14554	-2.997	0.0027264	0.14235	ZNF787	zinc finger protein 787
57658	0.24291	5219.4	0.081058	2.9968	0.0027286	0.14235	CALCOCO1	calcium binding and coiled-coil domain 1
10695	-0.31983	2160.6	0.10686	-2.9929	0.0027634	0.14361	CNPY3	canopy FGF signaling regulator 3
30001	0.20528	7335.8	0.06862	2.9915	0.0027763	0.14372	ERO1A	endoplasmic reticulum oxidoreductase 1 alpha
4179	0.2237	10064	0.074893	2.9869	0.002818	0.14532	CD46	CD46 molecule
10162	-0.88557	350.87	0.29663	-2.9855	0.0028313	0.14544	LPCAT3	lysophosphatidylcholine acyltransferase 3
115704	-0.31662	2357.2	0.10634	-2.9775	0.0029064	0.14873	EVI5L	ecotropic viral integration site 5 like
8440	-0.36871	1585.7	0.12406	-2.972	0.0029583	0.15062	NCK2	NCK adaptor protein 2
27243	-0.29015	3252.6	0.097675	-2.9706	0.0029726	0.15062	CHMP2A	charged multivesicular body protein 2A
9902	0.24604	6582.7	0.082839	2.9701	0.0029771	0.15062	MRC2	mannose receptor C type 2
6509	-0.46439	1379.5	0.15652	-2.9669	0.0030078	0.15159	SLC1A4	solute carrier family 1 member 4
55251	0.40153	1911.4	0.13544	2.9646	0.0030312	0.1522	PCMTD2	protein-L-isoaspartate (D-aspartate) O-methyltransferase domain containing 2
91748	0.23018	6084.9	0.077698	2.9626	0.0030509	0.15261	MIDEAS	mitotic deacetylase associated SANT domain protein
80025	-0.32285	2555	0.10903	-2.9612	0.0030647	0.15273	PANK2	pantothenate kinase 2
10890	-0.18014	8336.4	0.060913	-2.9574	0.0031026	0.15405	RAB10	"RAB10, member RAS oncogene family"
83590	-0.44151	1236	0.14944	-2.9544	0.0031324	0.1549	TMUB1	transmembrane and ubiquitin like domain containing 1
10250	0.22516	4534.7	0.076236	2.9534	0.0031429	0.1549	SRRM1	serine and arginine repetitive matrix 1
3696	0.43556	1338.5	0.14769	2.9491	0.0031874	0.15651	ITGB8	integrin subunit beta 8
55627	0.28367	3637.3	0.09623	2.9478	0.0032006	0.15658	SMPD4	sphingomyelin phosphodiesterase 4
26160	0.33825	2177.4	0.11482	2.9458	0.0032212	0.15702	IFT172	intraflagellar transport 172
3690	0.24258	5366.7	0.082428	2.9429	0.0032516	0.15745	ITGB3	integrin subunit beta 3
10181	0.23288	8387.3	0.079152	2.9422	0.003259	0.15745	RBM5	RNA binding motif protein 5
170692	0.35228	2437.1	0.11976	2.9416	0.0032654	0.15745	ADAMTS18	ADAM metallopeptidase with thrombospondin type 1 motif 18
26509	0.16075	21965	0.05467	2.9404	0.0032782	0.1575	MYOF	myoferlin
6618	-0.41918	1184.7	0.14291	-2.9332	0.0033553	0.16022	SNAPC2	small nuclear RNA activating complex polypeptide 2
55384	0.37667	1396.8	0.12848	2.9317	0.0033706	0.16022	MEG3	maternally expressed 3
23129	0.14277	44823	0.0487	2.9317	0.003371	0.16022	PLXND1	plexin D1
64771	-0.2302	3864.6	0.078621	-2.9279	0.0034122	0.16129	ILRUN	inflammation and lipid regulator with UBA-like and NBR1-like domains
8882	-0.38677	1961.2	0.13212	-2.9275	0.0034175	0.16129	ZPR1	ZPR1 zinc finger
10410	-0.20724	17361	0.070855	-2.9248	0.0034468	0.1621	IFITM3	interferon induced transmembrane protein 3
23181	0.22137	4976.1	0.075743	2.9227	0.0034702	0.16218	DIP2A	disco interacting protein 2 homolog A
22998	0.26262	3514.7	0.089862	2.9225	0.0034728	0.16218	LIMCH1	LIM and calponin homology domains 1
112752	-0.70412	608.23	0.24103	-2.9213	0.0034858	0.16222	IFT43	intraflagellar transport 43
60673	-0.3548	2284.4	0.1216	-2.9178	0.0035246	0.16345	ATG101	autophagy related 101
1915	-0.097656	220320	0.033559	-2.9099	0.003615	0.1653	EEF1A1	eukaryotic translation elongation factor 1 alpha 1
100287932	-0.32888	1933.5	0.11305	-2.9093	0.0036229	0.1653	TIMM23	translocase of inner mitochondrial membrane 23
3491	0.13089	29147	0.044997	2.9089	0.0036274	0.1653	CCN1	cellular communication network factor 1
284184	-0.46759	1162.5	0.16075	-2.9087	0.0036292	0.1653	NDUFAF8	NADH:ubiquinone oxidoreductase complex assembly factor 8
9583	0.22383	4620	0.076969	2.908	0.003637	0.1653	ENTPD4	ectonucleoside triphosphate diphosphohydrolase 4
79073	-0.21042	6371.9	0.072387	-2.9069	0.0036503	0.1653	TMEM109	transmembrane protein 109
23348	0.16053	12168	0.055237	2.9062	0.0036586	0.1653	DOCK9	dedicator of cytokinesis 9
100506495	-5.9129	10.215	2.0349	-2.9058	0.0036634	0.1653	LIFR-AS1	LIFR antisense RNA 1
37	0.19181	9632.4	0.066062	2.9034	0.0036911	0.16558	ACADVL	acyl-CoA dehydrogenase very long chain
9672	0.30401	2609.5	0.10474	2.9026	0.0037004	0.16558	SDC3	syndecan 3
55224	-0.56444	750.57	0.1945	-2.9021	0.0037069	0.16558	ETNK2	ethanolamine kinase 2
8764	0.22399	5785.8	0.077261	2.8992	0.0037412	0.16615	TNFRSF14	TNF receptor superfamily member 14
8216	0.25532	3383.2	0.088111	2.8977	0.0037593	0.16615	LZTR1	leucine zipper like transcription regulator 1
10350	0.29153	2326.6	0.10067	2.8957	0.0037826	0.16615	ABCA9	ATP binding cassette subfamily A member 9
6897	-0.23193	5506.5	0.080095	-2.8957	0.0037829	0.16615	TARS1	threonyl-tRNA synthetase 1
6772	-0.1852	14833	0.063959	-2.8957	0.0037836	0.16615	STAT1	signal transducer and activator of transcription 1
84456	0.30521	2642.7	0.10543	2.8948	0.0037942	0.16615	L3MBTL3	L3MBTL histone methyl-lysine binding protein 3
3685	0.18635	18398	0.064427	2.8924	0.0038229	0.16686	ITGAV	integrin subunit alpha V
8106	0.28467	5079.4	0.098618	2.8866	0.0038941	0.16941	PABPN1	poly(A) binding protein nuclear 1
339122	0.44278	2209.2	0.15363	2.8821	0.0039506	0.17131	RAB43	"RAB43, member RAS oncogene family"
121601	-5.9332	16.955	2.0604	-2.8797	0.0039806	0.17192	ANO4	anoctamin 4
3339	0.15909	212380	0.055266	2.8787	0.0039929	0.17192	HSPG2	heparan sulfate proteoglycan 2
1284	0.1698	54373	0.059033	2.8763	0.0040241	0.17192	COL4A2	collagen type IV alpha 2 chain
197335	0.46249	1354.6	0.16086	2.8751	0.0040394	0.17192	WDR90	WD repeat domain 90
9830	-0.39012	2305.9	0.13573	-2.8742	0.0040499	0.17192	TRIM14	tripartite motif containing 14
9055	-1.6882	120.47	0.58737	-2.8741	0.0040521	0.17192	PRC1	protein regulator of cytokinesis 1
3337	-0.2454	5914.6	0.085391	-2.8739	0.0040548	0.17192	DNAJB1	DnaJ heat shock protein family (Hsp40) member B1
2259	5.6063	12.036	1.9593	2.8614	0.0042182	0.17829	FGF14	fibroblast growth factor 14
8862	0.14806	80304	0.051806	2.858	0.0042632	0.17962	APLN	apelin
23399	-0.29855	3752.8	0.10455	-2.8555	0.0042969	0.18047	CTDNEP1	CTD nuclear envelope phosphatase 1
10313	-0.17505	9286.5	0.061414	-2.8502	0.0043686	0.18291	RTN3	reticulon 3
64837	-0.31735	3168.7	0.11146	-2.8473	0.0044093	0.18403	KLC2	kinesin light chain 2
94101	0.37491	1584.2	0.13189	2.8425	0.0044762	0.18604	ORMDL1	ORMDL sphingolipid biosynthesis regulator 1
23246	-0.41452	2031.5	0.14592	-2.8407	0.0045021	0.18604	BOP1	BOP1 ribosomal biogenesis factor
5645	-7.2114	7.9634	2.5401	-2.839	0.0045254	0.18604	PRSS2	serine protease 2
3425	0.37555	1927.3	0.13229	2.839	0.004526	0.18604	IDUA	alpha-L-iduronidase
2783	-0.22629	9021.7	0.079737	-2.838	0.00454	0.18604	GNB2	G protein subunit beta 2
54809	-0.20805	6094.6	0.07331	-2.8379	0.004541	0.18604	SAMD9	sterile alpha motif domain containing 9
7132	-0.19258	6875.1	0.067911	-2.8358	0.0045713	0.18616	TNFRSF1A	TNF receptor superfamily member 1A
388849	0.55468	695.27	0.19565	2.835	0.0045824	0.18616	CCDC188	coiled-coil domain containing 188
116983	0.27654	3463.6	0.097552	2.8348	0.0045857	0.18616	ACAP3	"ArfGAP with coiled-coil, ankyrin repeat and PH domains 3"
84894	-6.6816	7.2824	2.3588	-2.8326	0.0046174	0.18688	LINGO1	leucine rich repeat and Ig domain containing 1
57595	-6.0787	13.438	2.1467	-2.8316	0.0046317	0.18689	PDZD4	PDZ domain containing 4
728819	4.5232	13.503	1.5998	2.8273	0.0046945	0.18834	C1GALT1C1L	C1GALT1 specific chaperone 1 like
83481	-6.5882	10.381	2.3303	-2.8272	0.0046959	0.18834	EPPK1	epiplakin 1
2288	-0.27704	3794.1	0.098178	-2.8218	0.0047751	0.19095	FKBP4	FKBP prolyl isomerase 4
4301	0.20399	6774.1	0.072394	2.8177	0.0048365	0.19282	AFDN	"afadin, adherens junction formation factor"
27069	-0.18802	6414.9	0.066794	-2.815	0.0048781	0.1939	GHITM	growth hormone inducible transmembrane protein
5420	0.14795	16376	0.05259	2.8132	0.0049048	0.19394	PODXL	podocalyxin like
23139	0.25692	3874.1	0.091373	2.8118	0.0049273	0.19394	MAST2	microtubule associated serine/threonine kinase 2
50717	0.21253	5066.5	0.075605	2.8111	0.0049376	0.19394	DCAF8	DDB1 and CUL4 associated factor 8
79581	-0.35859	2202.7	0.12768	-2.8084	0.0049783	0.19394	SLC52A2	solute carrier family 52 member 2
3735	-0.22725	3958.2	0.080937	-2.8078	0.0049888	0.19394	KARS1	lysyl-tRNA synthetase 1
64087	0.34671	1561.2	0.1235	2.8073	0.0049952	0.19394	MCCC2	methylcrotonoyl-CoA carboxylase 2
267020	-6.3119	8.4941	2.2484	-2.8073	0.0049959	0.19394	ATP5MGL	ATP synthase membrane subunit g like
10209	-0.14879	19430	0.053012	-2.8068	0.0050043	0.19394	EIF1	eukaryotic translation initiation factor 1
6429	0.23016	4409.1	0.082043	2.8054	0.0050259	0.19394	SRSF4	serine and arginine rich splicing factor 4
5394	0.25804	3379.5	0.091996	2.8049	0.0050335	0.19394	EXOSC10	exosome component 10
5478	-0.15824	24281	0.056423	-2.8046	0.0050387	0.19394	PPIA	peptidylprolyl isomerase A
149478	0.27492	3256.4	0.098189	2.7999	0.0051122	0.19571	BTBD19	BTB domain containing 19
9409	-0.44755	1027.7	0.15985	-2.7998	0.005114	0.19571	PEX16	peroxisomal biogenesis factor 16
7314	-0.1352	18034	0.048311	-2.7985	0.0051333	0.19589	UBB	ubiquitin B
3315	-0.15711	21937	0.056216	-2.7947	0.0051942	0.19764	HSPB1	heat shock protein family B (small) member 1
57464	0.51387	747.96	0.18412	2.7909	0.0052563	0.19929	STRIP2	striatin interacting protein 2
51	0.25057	3463.6	0.089815	2.7898	0.0052741	0.19929	ACOX1	acyl-CoA oxidase 1
9498	0.54051	600.76	0.19378	2.7893	0.0052821	0.19929	SLC4A8	solute carrier family 4 member 8
968	-0.31882	1867.9	0.11442	-2.7865	0.0053283	0.19994	CD68	CD68 molecule
9114	-0.22948	6253.3	0.08237	-2.7859	0.0053376	0.19994	ATP6V0D1	ATPase H+ transporting V0 subunit d1
3688	0.12429	69170	0.044621	2.7855	0.0053444	0.19994	ITGB1	integrin subunit beta 1
50509	6.4839	7.3225	2.3291	2.7839	0.0053711	0.20038	COL5A3	collagen type V alpha 3 chain
2256	2.2563	106.4	0.81163	2.7799	0.0054371	0.20228	FGF11	fibroblast growth factor 11
292	-0.20543	5734.8	0.073958	-2.7777	0.005474	0.20243	SLC25A5	solute carrier family 25 member 5
6526	-0.49551	816.38	0.17843	-2.7771	0.0054844	0.20243	SLC5A3	solute carrier family 5 member 3
117145	0.37403	1214.6	0.13469	2.777	0.0054867	0.20243	THEM4	thioesterase superfamily member 4
10270	0.3186	1965.8	0.11478	2.7757	0.0055082	0.20267	AKAP8	A-kinase anchoring protein 8
51094	-0.22608	4307	0.081496	-2.7741	0.0055352	0.2031	ADIPOR1	adiponectin receptor 1
3482	0.15062	15410	0.054329	2.7724	0.0055642	0.20361	IGF2R	insulin like growth factor 2 receptor
26152	0.3523	2506.2	0.12718	2.7702	0.0056028	0.20446	ZNF337	zinc finger protein 337
9732	0.17264	11171	0.062445	2.7647	0.005697	0.20623	DOCK4	dedicator of cytokinesis 4
54463	-6.3308	11.824	2.2902	-2.7643	0.0057047	0.20623	RETREG1	reticulophagy regulator 1
339123	-0.41951	1208.6	0.15176	-2.7643	0.0057048	0.20623	JMJD8	jumonji domain containing 8
5360	-0.30924	3005.5	0.11189	-2.7638	0.0057132	0.20623	PLTP	phospholipid transfer protein
8148	0.22474	9712.8	0.081345	2.7628	0.0057314	0.20633	TAF15	TATA-box binding protein associated factor 15
57198	0.25385	3926	0.091999	2.7593	0.0057925	0.20797	ATP8B2	ATPase phospholipid transporting 8B2
154197	-7.0081	8.6251	2.546	-2.7525	0.0059135	0.21175	PNLDC1	"PARN like, ribonuclease domain containing 1"
56889	0.22826	9975.5	0.083094	2.747	0.0060148	0.2148	TM9SF3	transmembrane 9 superfamily member 3
6184	-0.17034	13209	0.062058	-2.7449	0.006053	0.21538	RPN1	ribophorin I
54982	-0.44118	993.55	0.16076	-2.7443	0.0060633	0.21538	CLN6	CLN6 transmembrane ER protein
1647	-0.18569	6411.9	0.067782	-2.7395	0.0061528	0.21797	GADD45A	growth arrest and DNA damage inducible alpha
344787	1.3129	98.757	0.47988	2.7359	0.0062201	0.21923	ZNF860	zinc finger protein 860
4494	-6.3146	7.6222	2.3083	-2.7356	0.0062263	0.21923	MT1F	metallothionein 1F
526	-0.16235	9795	0.059359	-2.735	0.0062374	0.21923	ATP6V1B2	ATPase H+ transporting V1 subunit B2
25865	-0.23892	4347.2	0.087409	-2.7334	0.0062683	0.21973	PRKD2	protein kinase D2
388581	-1.9929	45.328	0.72975	-2.731	0.0063151	0.22033	C1QTNF12	C1q and TNF related 12
56904	0.2425	3498.9	0.088807	2.7307	0.0063204	0.22033	SH3GLB2	"SH3 domain containing GRB2 like, endophilin B2"
22932	-0.98155	262.42	0.35967	-2.729	0.0063519	0.22033	POMZP3	POM121 and ZP3 fusion
6595	0.24508	3035.2	0.089838	2.728	0.006372	0.22033	SMARCA2	"SWI/SNF related, matrix associated, actin dependent regulator of chromatin, subfamily a, member 2"
90288	-3.4359	20.165	1.2596	-2.7278	0.0063762	0.22033	EFCAB12	EF-hand calcium binding domain 12
445815	0.15046	27999	0.055168	2.7274	0.0063843	0.22033	PALM2AKAP2	PALM2 and AKAP2 fusion
6748	-0.28554	5041.6	0.10476	-2.7256	0.006418	0.22068	SSR4	signal sequence receptor subunit 4
51293	-0.38367	1914.4	0.14079	-2.7251	0.0064274	0.22068	CD320	CD320 molecule
84101	6.1555	8.3427	2.2595	2.7243	0.0064438	0.22068	USP44	ubiquitin specific peptidase 44
57724	0.2347	4784	0.086205	2.7226	0.0064775	0.22126	EPG5	ectopic P-granules autophagy protein 5 homolog
11280	-6.1603	12.698	2.2645	-2.7204	0.006521	0.22218	SCN11A	sodium voltage-gated channel alpha subunit 11
23524	0.13485	26647	0.049641	2.7165	0.0065978	0.22423	SRRM2	serine/arginine repetitive matrix 2
3665	-0.32364	2942	0.11926	-2.7138	0.0066525	0.22519	IRF7	interferon regulatory factor 7
1026	-0.1199	25893	0.044199	-2.7127	0.0066746	0.22519	CDKN1A	cyclin dependent kinase inhibitor 1A
10025	-0.28988	2479.5	0.10687	-2.7125	0.0066769	0.22519	MED16	mediator complex subunit 16
4811	0.18294	8877	0.067834	2.6968	0.0070007	0.23552	NID1	nidogen 1
6187	-0.18753	39092	0.069635	-2.693	0.0070814	0.23709	RPS2	ribosomal protein S2
4540	-0.43884	341500	0.16296	-2.6929	0.0070829	0.23709	MT-ND5	mitochondrially encoded NADH dehydrogenase 5
387921	0.39587	1077.6	0.14723	2.6887	0.0071733	0.23937	NHLRC3	NHL repeat containing 3
10607	-0.41219	1860.6	0.15334	-2.6881	0.0071869	0.23937	TBL3	transducin beta like 3
56413	0.58977	502.99	0.21951	2.6867	0.0072152	0.23972	LTB4R2	leukotriene B4 receptor 2
79094	-0.4825	818.62	0.17975	-2.6843	0.0072681	0.24087	CHAC1	ChaC glutathione specific gamma-glutamylcyclotransferase 1
257364	-0.30954	2283.9	0.11539	-2.6826	0.0073049	0.2415	SNX33	sorting nexin 33
3725	0.14927	10913	0.055682	2.6808	0.0073448	0.24221	JUN	"Jun proto-oncogene, AP-1 transcription factor subunit"
10603	-1.3609	91.508	0.50792	-2.6793	0.0073769	0.24236	SH2B2	SH2B adaptor protein 2
10726	-0.22233	5958.2	0.08299	-2.6789	0.0073854	0.24236	NUDC	"nuclear distribution C, dynein complex regulator"
56916	0.31668	2115.6	0.1183	2.677	0.0074284	0.24292	SMARCAD1	"SWI/SNF-related, matrix-associated actin-dependent regulator of chromatin, subfamily a, containing DEAD/H box 1"
2100	1.3095	105.12	0.4893	2.6763	0.0074436	0.24292	ESR2	estrogen receptor 2
284612	5.8606	9.1526	2.1903	2.6757	0.0074571	0.24292	SYPL2	synaptophysin like 2
728661	0.22295	3807.8	0.083376	2.674	0.0074957	0.24358	SLC35E2B	solute carrier family 35 member E2B
6573	-0.59954	673.55	0.2243	-2.6729	0.007519	0.24375	SLC19A1	solute carrier family 19 member 1
1808	0.17981	10238	0.06734	2.6702	0.0075809	0.24516	DPYSL2	dihydropyrimidinase like 2
7316	-0.11364	64971	0.042577	-2.669	0.0076083	0.24545	UBC	ubiquitin C
6794	-0.238	3945.9	0.089257	-2.6664	0.0076668	0.24674	STK11	serine/threonine kinase 11
4585	-6.4455	6.7205	2.4205	-2.6628	0.0077482	0.24876	MUC4	"mucin 4, cell surface associated"
339983	-1.2396	136.25	0.4658	-2.6612	0.0077864	0.24939	NAT8L	N-acetyltransferase 8 like
56892	0.29469	3542.7	0.11113	2.6517	0.008009	0.25549	TCIM	transcriptional and immune response regulator
10549	-0.25758	3904.4	0.097155	-2.6513	0.0080191	0.25549	PRDX4	peroxiredoxin 4
800	0.143	18434	0.053948	2.6506	0.0080341	0.25549	CALD1	caldesmon 1
4509	-0.43205	44858	0.1631	-2.649	0.0080729	0.25611	MT-ATP8	mitochondrially encoded ATP synthase 8
403	-0.48929	742.78	0.18489	-2.6464	0.0081348	0.25746	ARL3	ADP ribosylation factor like GTPase 3
54972	0.17521	11271	0.066322	2.6419	0.0082449	0.25983	TMEM132A	transmembrane protein 132A
2665	-0.16356	9735.6	0.061912	-2.6417	0.0082486	0.25983	GDI2	GDP dissociation inhibitor 2
10539	-0.28381	3065.6	0.10747	-2.6407	0.0082724	0.25997	GLRX3	glutaredoxin 3
7216	2.0929	41.575	0.79322	2.6385	0.0083267	0.2607	TRO	trophinin
85441	-0.18182	13894	0.068948	-2.6371	0.0083623	0.2607	HELZ2	helicase with zinc finger 2
6175	-0.12678	33713	0.048076	-2.637	0.0083649	0.2607	RPLP0	ribosomal protein lateral stalk subunit P0
57477	0.23027	3479.2	0.087337	2.6366	0.0083738	0.2607	SHROOM4	shroom family member 4
54996	0.54828	598.52	0.20818	2.6336	0.0084478	0.26239	MTARC2	mitochondrial amidoxime reducing component 2
80830	-0.28817	2264	0.10947	-2.6325	0.0084763	0.26246	APOL6	apolipoprotein L6
283820	0.14935	11323	0.056758	2.6314	0.0085043	0.26246	NOMO2	NODAL modulator 2
91298	0.55514	655.56	0.21098	2.6312	0.008509	0.26246	C12orf29	chromosome 12 open reading frame 29
1290	0.15876	8791.1	0.060368	2.6299	0.0085403	0.26255	COL5A2	collagen type V alpha 2 chain
51466	0.33561	1648.4	0.12763	2.6295	0.0085513	0.26255	EVL	Enah/Vasp-like
8740	-5.9784	8.2805	2.2749	-2.628	0.0085901	0.26314	TNFSF14	TNF superfamily member 14
64123	0.14963	11445	0.05698	2.626	0.0086402	0.2638	ADGRL4	adhesion G protein-coupled receptor L4
6836	-0.15982	12813	0.060871	-2.6255	0.0086511	0.2638	SURF4	surfeit 4
7167	-0.15297	20544	0.058324	-2.6228	0.008722	0.26535	TPI1	triosephosphate isomerase 1
152206	5.8923	10.934	2.2478	2.6214	0.0087564	0.2658	CCDC13	coiled-coil domain containing 13
4598	-0.71368	370.99	0.27252	-2.6188	0.0088244	0.26725	MVK	mevalonate kinase
6513	-0.26343	2769.2	0.10082	-2.6128	0.0089812	0.27139	SLC2A1	solute carrier family 2 member 1
27031	0.3391	1837.5	0.12983	2.6119	0.0090054	0.2715	NPHP3	nephrocystin 3
4037	-0.44139	883.95	0.16912	-2.6099	0.0090568	0.27244	LRP3	LDL receptor related protein 3
2934	0.13272	17920	0.050872	2.609	0.0090817	0.27257	GSN	gelsolin
3081	-5.1414	19.214	1.9713	-2.6081	0.009105	0.27266	HGD	"homogentisate 1,2-dioxygenase"
79778	0.25134	3436.9	0.096435	2.6063	0.0091522	0.27317	MICALL2	MICAL like 2
2823	-6.3482	7.7204	2.4364	-2.6056	0.0091718	0.27317	GPM6A	glycoprotein M6A
55194	-0.50402	1689.6	0.19347	-2.6051	0.0091835	0.27317	EVA1B	eva-1 homolog B
348793	-0.70507	335.77	0.27095	-2.6022	0.0092638	0.27439	WDR53	WD repeat domain 53
573	-0.2987	2033.1	0.11482	-2.6014	0.0092836	0.27439	BAG1	BAG cochaperone 1
6778	0.15723	9917.7	0.06044	2.6013	0.009286	0.27439	STAT6	signal transducer and activator of transcription 6
1654	0.15803	13601	0.060784	2.5998	0.0093266	0.27498	DDX3X	DEAD-box helicase 3 X-linked
155400	0.37337	1181.8	0.14371	2.5982	0.0093726	0.2753	NSUN5P1	NSUN5 pseudogene 1
57509	0.19797	5950.5	0.076202	2.5979	0.0093785	0.2753	MTUS1	microtubule associated scaffold protein 1
10573	-0.3249	1988.1	0.12511	-2.5969	0.0094077	0.27555	MRPL28	mitochondrial ribosomal protein L28
29107	-0.61142	416.64	0.23569	-2.5942	0.0094814	0.2771	NXT1	nuclear transport factor 2 like export factor 1
5702	-0.21622	3743.8	0.083439	-2.5913	0.0095609	0.27855	PSMC3	"proteasome 26S subunit, ATPase 3"
1906	0.15628	10569	0.060318	2.5909	0.0095728	0.27855	EDN1	endothelin 1
25780	0.27837	3367	0.1075	2.5896	0.0096099	0.27902	RASGRP3	RAS guanyl releasing protein 3
60481	0.33721	3426	0.13027	2.5885	0.0096396	0.27928	ELOVL5	ELOVL fatty acid elongase 5
134266	0.24768	3726.5	0.095797	2.5855	0.0097252	0.28062	GRPEL2
9388	0.23608	3907.9	0.091325	2.5851	0.0097362	0.28062	LIPG	"lipase G, endothelial type"
652	-0.37672	1718.2	0.14576	-2.5845	0.009753	0.28062	BMP4	bone morphogenetic protein 4
201181	-5.8006	8.1966	2.2449	-2.5839	0.0097701	0.28062	ZNF385C	zinc finger protein 385C
5934	0.26855	2690.9	0.10399	2.5824	0.0098112	0.2812	RBL2	RB transcriptional corepressor like 2
23586	-0.18166	6553	0.070391	-2.5807	0.0098611	0.28156	DDX58	DExD/H-box helicase 58
4842	6.3581	7.1633	2.465	2.5794	0.009898	0.28156	NOS1	nitric oxide synthase 1
23353	0.22749	5832.1	0.088197	2.5793	0.0098998	0.28156	SUN1	Sad1 and UNC84 domain containing 1
57617	-0.26703	3913.5	0.10355	-2.5788	0.0099155	0.28156	VPS18	VPS18 core subunit of CORVET and HOPS complexes
26051	0.16318	10728	0.063289	2.5783	0.0099293	0.28156	PPP1R16B	protein phosphatase 1 regulatory subunit 16B
182	0.20433	7140	0.079327	2.5758	0.010002	0.28301	JAG1	jagged canonical Notch ligand 1
55327	0.35046	1728	0.13616	2.5739	0.010057	0.28398	LIN7C	"lin-7 homolog C, crumbs cell polarity complex component"
9905	0.274	3876.3	0.10658	2.5708	0.010145	0.28544	SGSM2	small G protein signaling modulator 2
5865	0.22971	4820.1	0.089358	2.5706	0.010152	0.28544	RAB3B	"RAB3B, member RAS oncogene family"
4794	-0.3378	1447.3	0.13165	-2.566	0.010289	0.2887	NFKBIE	NFKB inhibitor epsilon
54991	0.50474	636.63	0.19692	2.5632	0.010372	0.29041	C1orf159	chromosome 1 open reading frame 159
80304	0.48714	673.27	0.19031	2.5597	0.010475	0.29228	WDCP	WD repeat and coiled coil containing
79891	0.77115	329.49	0.30129	2.5595	0.010482	0.29228	ZNF671	zinc finger protein 671
7295	-0.23196	7715.8	0.090804	-2.5545	0.010633	0.29587	TXN	thioredoxin
125919	-0.65683	413.44	0.25748	-2.551	0.010742	0.29827	ZNF543	zinc finger protein 543
11328	0.19015	6701.8	0.074604	2.5488	0.01081	0.29913	FKBP9	FKBP prolyl isomerase 9
4439	0.72953	555.64	0.28626	2.5485	0.01082	0.29913	MSH5	mutS homolog 5
2200	0.18037	5836.7	0.070809	2.5473	0.010856	0.29913	FBN1	fibrillin 1
84901	0.23692	3694.4	0.093014	2.5471	0.010862	0.29913	NFATC2IP	nuclear factor of activated T cells 2 interacting protein
22861	0.20856	4070.7	0.081912	2.5461	0.010892	0.29934	NLRP1	NLR family pyrin domain containing 1
6188	-0.12973	37750	0.050968	-2.5453	0.010919	0.29945	RPS3	ribosomal protein S3
50832	-1.0979	113.66	0.43191	-2.5419	0.011026	0.30176	TAS2R4	taste 2 receptor member 4
80206	3.667	30.393	1.443	2.5411	0.011049	0.30179	FHOD3	formin homology 2 domain containing 3
129607	-0.38438	1215.8	0.15133	-2.5401	0.011082	0.30207	CMPK2	cytidine/uridine monophosphate kinase 2
10325	-0.44751	904.01	0.17633	-2.538	0.01115	0.30292	RRAGB	Ras related GTP binding B
51116	-0.46149	1321.8	0.18186	-2.5377	0.011159	0.30292	MRPS2	mitochondrial ribosomal protein S2
3948	-5.5272	13.419	2.1796	-2.5358	0.011219	0.30343	LDHC	lactate dehydrogenase C
4904	-0.16321	21610	0.064375	-2.5353	0.011237	0.30343	YBX1	Y-box binding protein 1
5479	-0.15561	10227	0.061386	-2.535	0.011246	0.30343	PPIB	peptidylprolyl isomerase B
1211	-0.16447	8408.3	0.064933	-2.5329	0.011311	0.30458	CLTA	clathrin light chain A
23089	0.29789	2084.4	0.11772	2.5305	0.011388	0.30604	PEG10	paternally expressed 10
1639	-0.19781	9131.3	0.078368	-2.5241	0.011598	0.31066	DCTN1	dynactin subunit 1
11007	-0.22467	4977.3	0.089035	-2.5234	0.011622	0.31066	CCDC85B	coiled-coil domain containing 85B
80097	-0.32212	1790.7	0.12767	-2.5232	0.01163	0.31066	MZT2B	mitotic spindle organizing protein 2B
5591	0.17268	8774.5	0.068594	2.5175	0.01182	0.31492	PRKDC	"protein kinase, DNA-activated, catalytic subunit"
201163	0.17638	7096.5	0.070074	2.517	0.011837	0.31492	FLCN	folliculin
85378	0.20972	3979.2	0.083356	2.5159	0.011872	0.31523	TUBGCP6	tubulin gamma complex associated protein 6
23154	-0.35566	1754.1	0.14149	-2.5137	0.011949	0.3159	NCDN	neurochondrin
117608	0.56199	539.74	0.22359	2.5135	0.011954	0.3159	ZNF354B	zinc finger protein 354B
9518	-0.11751	25457	0.046765	-2.5129	0.011975	0.3159	GDF15	growth differentiation factor 15
11316	-0.2317	4647	0.092224	-2.5124	0.011992	0.3159	COPE	COPI coat complex subunit epsilon
339456	5.973	8.8868	2.3784	2.5113	0.012027	0.31621	TMEM52	transmembrane protein 52
27063	0.12584	37697	0.050124	2.5106	0.012052	0.31625	ANKRD1	ankyrin repeat domain 1
10618	0.13801	16597	0.05501	2.5088	0.012114	0.31724	TGOLN2	trans-golgi network protein 2
1471	-0.18183	8432.8	0.07251	-2.5076	0.012155	0.31736	CST3	cystatin C
80227	-0.50589	697.44	0.20185	-2.5063	0.0122	0.31736	PAAF1	proteasomal ATPase associated factor 1
63917	0.27826	1922.3	0.11103	2.5063	0.012201	0.31736	GALNT11	polypeptide N-acetylgalactosaminyltransferase 11
497190	2.1725	34.901	0.86695	2.5059	0.012214	0.31736	CLEC18B	C-type lectin domain family 18 member B
10397	-0.1925	9728.2	0.076894	-2.5034	0.012299	0.31824	NDRG1	N-myc downstream regulated 1
54187	-0.30145	1664.6	0.12044	-2.5029	0.012317	0.31824	NANS	N-acetylneuraminate synthase
50649	-6.0142	8.7485	2.4035	-2.5023	0.012339	0.31824	ARHGEF4	Rho guanine nucleotide exchange factor 4
100526830	0.34968	1642.9	0.13975	2.5022	0.012343	0.31824	SLX1A-SULT1A3	SLX1A-SULT1A3 readthrough (NMD candidate)
4193	0.1174	39927	0.046943	2.5009	0.012388	0.3188	MDM2	MDM2 proto-oncogene
7068	-6.7364	7.0708	2.6947	-2.4998	0.012425	0.31913	THRB	thyroid hormone receptor beta
83719	0.34938	1400.4	0.13987	2.4978	0.012495	0.31972	YPEL3	yippee like 3
3309	0.14504	21245	0.058086	2.497	0.012525	0.31972	HSPA5	heat shock protein family A (Hsp70) member 5
1362	0.16499	8285.6	0.066078	2.4969	0.012527	0.31972	CPD	carboxypeptidase D
8874	0.16611	5954.2	0.066539	2.4965	0.012544	0.31972	ARHGEF7	Rho guanine nucleotide exchange factor 7
26064	0.13225	20872	0.05299	2.4958	0.012568	0.31973	RAI14	retinoic acid induced 14
128434	-0.92513	178.95	0.37117	-2.4925	0.012685	0.3221	VSTM2L	V-set and transmembrane domain containing 2 like
2778	-0.11274	28857	0.045266	-2.4906	0.012752	0.32319	GNAS	GNAS complex locus
2651	-0.35001	1147.7	0.14068	-2.488	0.012845	0.32439	GCNT2	glucosaminyl (N-acetyl) transferase 2 (I blood group)
11315	-0.26395	3957.1	0.10609	-2.4879	0.012848	0.32439	PARK7	Parkinsonism associated deglycase
84232	-0.22986	3158.6	0.092437	-2.4866	0.012896	0.32443	MAF1	"MAF1 homolog, negative regulator of RNA polymerase III"
154043	-0.3521	1392.8	0.1416	-2.4866	0.012899	0.32443	CNKSR3	CNKSR family member 3
7155	0.17705	4966.5	0.071224	2.4858	0.012927	0.32454	TOP2B	DNA topoisomerase II beta
10963	-0.20876	7855	0.08408	-2.4828	0.013034	0.3266	STIP1	stress induced phosphoprotein 1
29906	5.8373	9.5272	2.3529	2.4809	0.013105	0.32725	ST8SIA5	"ST8 alpha-N-acetyl-neuraminide alpha-2,8-sialyltransferase 5"
65009	0.17176	7217	0.069234	2.4808	0.013109	0.32725	NDRG4	NDRG family member 4
9045	-0.15445	18233	0.062357	-2.4769	0.013253	0.32932	RPL14	ribosomal protein L14
100862671	3.2383	18.302	1.3074	2.4769	0.013254	0.32932	TMEM265	transmembrane protein 265
4047	0.20166	5501.4	0.081429	2.4766	0.013266	0.32932	LSS	lanosterol synthase
158471	0.28403	1997.7	0.11477	2.4747	0.013334	0.32939	PRUNE2	prune homolog 2 with BCH domain
9618	-0.27613	2055.5	0.1116	-2.4744	0.013347	0.32939	TRAF4	TNF receptor associated factor 4
55754	0.15684	14224	0.063398	2.4739	0.013363	0.32939	TMEM30A	transmembrane protein 30A
54873	0.17824	5168	0.072066	2.4733	0.013386	0.32939	PALMD	palmdelphin
51253	-0.25678	2365.7	0.10383	-2.4732	0.013392	0.32939	MRPL37	mitochondrial ribosomal protein L37
63910	0.36832	1600.8	0.14902	2.4717	0.013449	0.33019	SLC17A9	solute carrier family 17 member 9
7520	-0.14233	9591.7	0.057644	-2.4692	0.013542	0.33186	XRCC5	X-ray repair cross complementing 5
24138	-0.2621	2369.8	0.10624	-2.467	0.013623	0.33241	IFIT5	interferon induced protein with tetratricopeptide repeats 5
6648	0.096894	66651	0.039285	2.4664	0.013648	0.33241	SOD2	superoxide dismutase 2
57489	0.27082	2533.8	0.10982	2.4661	0.01366	0.33241	ODF2L	outer dense fiber of sperm tails 2 like
3933	-6.9732	5.6504	2.8278	-2.466	0.013664	0.33241	LCN1	lipocalin 1
23788	-0.23331	3140.5	0.094663	-2.4647	0.013714	0.33253	MTCH2	mitochondrial carrier 2
284040	1.3441	205	0.54539	2.4646	0.013718	0.33253	CDRT4	CMT1A duplicated region transcript 4
51593	0.21395	4307.8	0.086926	2.4612	0.013846	0.33501	SRRT	"serrate, RNA effector molecule"
154091	1.749	47.876	0.71126	2.4589	0.013935	0.33628	SLC2A12	solute carrier family 2 member 12
79873	-0.62707	428.93	0.2551	-2.4581	0.013969	0.33628	NUDT18	nudix hydrolase 18
718	0.2226	4474.2	0.090585	2.4574	0.013995	0.33628	C3	complement C3
6159	-0.15351	21492	0.062484	-2.4568	0.014019	0.33628	RPL29	ribosomal protein L29
57608	0.19158	7310.2	0.077985	2.4566	0.014024	0.33628	JCAD	junctional cadherin 5 associated
31	0.28331	2593.2	0.11538	2.4554	0.014072	0.33683	ACACA	acetyl-CoA carboxylase alpha
6583	0.5135	544.78	0.20943	2.4519	0.014209	0.33819	SLC22A4	solute carrier family 22 member 4
79711	-0.37874	1098	0.15451	-2.4513	0.014235	0.33819	IPO4	importin 4
977	-0.13956	19136	0.056944	-2.4508	0.014252	0.33819	CD151	CD151 molecule (Raph blood group)
8837	0.12188	23530	0.049759	2.4494	0.014308	0.33819	CFLAR	CASP8 and FADD like apoptosis regulator
2175	1.0715	146.51	0.43752	2.4491	0.014323	0.33819	FANCA	FA complementation group A
1153	0.17519	7620.5	0.07154	2.4489	0.014331	0.33819	CIRBP	cold inducible RNA binding protein
79869	0.2293	2859.7	0.093667	2.448	0.014365	0.33819	CPSF7	cleavage and polyadenylation specific factor 7
100533952	6.3471	5.5571	2.5928	2.448	0.014366	0.33819	RBAK-RBAKDN	RBAK-RBAKDN readthrough
80273	-0.3226	2165.8	0.1318	-2.4477	0.014376	0.33819	GRPEL1
26471	-0.30009	1954.1	0.12261	-2.4476	0.014382	0.33819	NUPR1	"nuclear protein 1, transcriptional regulator"
947	0.1162	18072	0.047488	2.4468	0.014412	0.33828	CD34	CD34 molecule
79729	0.47838	1329.2	0.19559	2.4459	0.01445	0.33858	SH3D21	SH3 domain containing 21
8775	-0.16192	8426.4	0.066349	-2.4405	0.014667	0.34301	NAPA	NSF attachment protein alpha
23328	0.16854	11244	0.069078	2.4399	0.01469	0.34301	SASH1	SAM and SH3 domain containing 1
8870	0.20562	4030.2	0.084417	2.4358	0.01486	0.34569	IER3	immediate early response 3
7511	0.19905	3675.6	0.081737	2.4353	0.014879	0.34569	XPNPEP1	X-prolyl aminopeptidase 1
56731	-0.30006	1798.5	0.12322	-2.4352	0.014883	0.34569	SLC2A4RG	SLC2A4 regulator
79903	-0.27818	2369	0.11431	-2.4337	0.014946	0.3463	NAA60	"N-alpha-acetyltransferase 60, NatF catalytic subunit"
55191	0.18156	5681.1	0.074625	2.433	0.014976	0.3463	NADSYN1	NAD synthetase 1
56925	0.28887	1679.9	0.11879	2.4317	0.015027	0.3463	LXN	latexin
9880	-0.47116	651.33	0.19378	-2.4315	0.015038	0.3463	ZBTB39	zinc finger and BTB domain containing 39
3030	-0.1432	11374	0.058897	-2.4314	0.015039	0.3463	HADHA	hydroxyacyl-CoA dehydrogenase trifunctional multienzyme complex subunit alpha
5610	-0.14416	11084	0.059321	-2.4302	0.015089	0.34686	EIF2AK2	eukaryotic translation initiation factor 2 alpha kinase 2
64105	0.96582	142.06	0.39779	2.428	0.015182	0.34841	CENPK	centromere protein K
1909	-2.6692	20.79	1.1008	-2.4249	0.015314	0.35083	EDNRA	endothelin receptor type A
3157	0.40155	816.45	0.16564	2.4242	0.015341	0.35085	HMGCS1	3-hydroxy-3-methylglutaryl-CoA synthase 1
196996	-6.6354	6.8297	2.7389	-2.4227	0.015407	0.35175	GRAMD2A	GRAM domain containing 2A
10112	-6.4428	8.1413	2.6626	-2.4197	0.015532	0.35393	KIF20A	kinesin family member 20A
23285	0.8667	214.77	0.35826	2.4192	0.015555	0.35393	23285	NA
6035	-0.1544	10504	0.06386	-2.4179	0.015612	0.35462	RNASE1	"ribonuclease A family member 1, pancreatic"
6301	-0.15718	8781.6	0.065023	-2.4172	0.015639	0.35463	SARS1	seryl-tRNA synthetase 1
9770	0.27253	2419.7	0.11287	2.4146	0.015754	0.35663	RASSF2	Ras association domain family member 2
6935	0.17116	6700.8	0.070948	2.4125	0.015845	0.35808	ZEB1	zinc finger E-box binding homeobox 1
541468	-1.8929	40.793	0.7856	-2.4096	0.015971	0.36032	LURAP1	leucine rich adaptor protein 1
9568	-0.37838	1024.5	0.15709	-2.4087	0.016011	0.36062	GABBR2	gamma-aminobutyric acid type B receptor subunit 2
4166	-2.3266	25.517	0.9669	-2.4062	0.016118	0.36168	CHST6	carbohydrate sulfotransferase 6
89781	0.25479	2315.1	0.10591	2.4058	0.016138	0.36168	HPS4	HPS4 biogenesis of lysosomal organelles complex 3 subunit 2
10724	0.15838	9541.5	0.065842	2.4054	0.016155	0.36168	OGA	O-GlcNAcase
154810	-0.20967	3781.1	0.087177	-2.4051	0.016167	0.36168	AMOTL1	angiomotin like 1
124540	0.29361	1623.5	0.12229	2.4009	0.016356	0.3653	MSI2	musashi RNA binding protein 2
23469	-0.19048	3829.2	0.079498	-2.396	0.016577	0.36961	PHF3	PHD finger protein 3
2919	0.17354	10295	0.072465	2.3948	0.016629	0.36961	CXCL1	C-X-C motif chemokine ligand 1
55695	-0.52719	512.14	0.22014	-2.3947	0.016632	0.36961	NSUN5	NOP2/Sun RNA methyltransferase 5
8754	0.13828	11573	0.05776	2.394	0.016665	0.36972	ADAM9	ADAM metallopeptidase domain 9
7122	-0.1744	9799.1	0.072885	-2.3928	0.016721	0.37009	CLDN5	claudin 5
1655	0.1381	31462	0.057725	2.3924	0.016736	0.37009	DDX5	DEAD-box helicase 5
84310	-0.28135	1899.3	0.11767	-2.391	0.016804	0.37097	C7orf50	chromosome 7 open reading frame 50
8704	-0.25901	2417.8	0.10838	-2.3897	0.016862	0.37163	B4GALT2	"beta-1,4-galactosyltransferase 2"
311	-0.22724	5394	0.095197	-2.3871	0.016984	0.3724	ANXA11	annexin A11
8535	-0.33774	1355.6	0.1415	-2.3869	0.016993	0.3724	CBX4	chromobox 4
2078	0.16149	8006.8	0.067661	2.3868	0.016997	0.3724	ERG	ETS transcription factor ERG
4783	-0.38511	1032.4	0.1614	-2.386	0.017031	0.3724	NFIL3	"nuclear factor, interleukin 3 regulated"
231	-0.15721	6717.7	0.06592	-2.3848	0.017088	0.3724	AKR1B1	aldo-keto reductase family 1 member B
6170	-0.22851	7126.9	0.095839	-2.3843	0.017113	0.3724	RPL39	ribosomal protein L39
110806280	-0.84328	171.47	0.35371	-2.3841	0.01712	0.3724	CCDC194	coiled-coil domain containing 194
3265	-0.30084	1831.2	0.12618	-2.3841	0.01712	0.3724	HRAS	"HRas proto-oncogene, GTPase"
9962	0.26229	2102.6	0.11019	2.3803	0.017297	0.3748	SLC23A2	solute carrier family 23 member 2
5625	6.0646	6.7908	2.5481	2.38	0.017311	0.3748	PRODH	proline dehydrogenase 1
64114	-0.18842	10608	0.07918	-2.3797	0.017327	0.3748	TMBIM1	transmembrane BAX inhibitor motif containing 1
2313	0.17555	6009.5	0.073793	2.3789	0.017364	0.3748	FLI1	"Fli-1 proto-oncogene, ETS transcription factor"
10057	0.30405	2646.9	0.12782	2.3788	0.017371	0.3748	ABCC5	ATP binding cassette subfamily C member 5
4938	-0.21079	4941.9	0.088671	-2.3773	0.017442	0.37574	OAS1	2'-5'-oligoadenylate synthetase 1
94240	-0.33223	1559.8	0.13986	-2.3755	0.017527	0.37695	EPSTI1	epithelial stromal interaction 1
80124	-0.24128	2533.2	0.1016	-2.3748	0.017558	0.37702	VCPIP1	valosin containing protein interacting protein 1
127943	-6.5902	5.5762	2.7758	-2.3741	0.01759	0.37709	FCRLB	Fc receptor like B
57045	0.19566	4425.3	0.082433	2.3735	0.01762	0.37713	TWSG1	twisted gastrulation BMP signaling modulator 1
90273	-1.5937	57.249	0.67234	-2.3704	0.017771	0.37963	CEACAM21	CEA cell adhesion molecule 21
4053	0.13041	14197	0.055028	2.3699	0.017793	0.37963	LTBP2	latent transforming growth factor beta binding protein 2
8554	0.30476	1544	0.12868	2.3684	0.017865	0.37985	PIAS1	protein inhibitor of activated STAT 1
26578	0.30135	1817.1	0.12724	2.3683	0.017869	0.37985	OSTF1	osteoclast stimulating factor 1
80818	-0.34495	1364.9	0.14568	-2.3679	0.017889	0.37985	ZNF436	zinc finger protein 436
5775	-0.35548	1087.6	0.15026	-2.3659	0.017988	0.38062	PTPN4	protein tyrosine phosphatase non-receptor type 4
153222	-0.23145	2857.7	0.097832	-2.3657	0.017994	0.38062	CREBRF	CREB3 regulatory factor
3659	-0.24504	2504.1	0.10359	-2.3654	0.018011	0.38062	IRF1	interferon regulatory factor 1
390261	4.141	11.079	1.7517	2.364	0.01808	0.38147	OR6M1	olfactory receptor family 6 subfamily M member 1
1445	-0.23634	3338	0.10002	-2.3629	0.018132	0.38166	CSK	C-terminal Src kinase
23481	-0.25192	3807.5	0.10663	-2.3626	0.018146	0.38166	PES1	pescadillo ribosomal biogenesis factor 1
81858	-0.26526	1977	0.11239	-2.3601	0.018271	0.38335	SHARPIN	SHANK associated RH domain interactor
85359	-0.37763	1011.5	0.16003	-2.3598	0.018284	0.38335	DGCR6L	DiGeorge syndrome critical region gene 6 like
396	-0.15949	17850	0.067639	-2.3579	0.018378	0.38408	ARHGDIA	Rho GDP dissociation inhibitor alpha
10915	0.24719	3264.9	0.10484	2.3578	0.018385	0.38408	TCERG1	transcription elongation regulator 1
25915	-0.3529	1141.3	0.14971	-2.3572	0.018411	0.38408	NDUFAF3	NADH:ubiquinone oxidoreductase complex assembly factor 3
1810	-0.26978	2413.5	0.11449	-2.3563	0.018458	0.38408	DR1	down-regulator of transcription 1
341676	6.1996	8.5559	2.6312	2.3562	0.018462	0.38408	NEK5	NIMA related kinase 5
10155	-0.19695	8872.7	0.083657	-2.3542	0.018563	0.38557	TRIM28	tripartite motif containing 28
9973	0.44166	844.85	0.18768	2.3532	0.018612	0.386	CCS	copper chaperone for superoxide dismutase
84132	-0.36331	1064.8	0.15451	-2.3513	0.018706	0.38734	USP42	ubiquitin specific peptidase 42
79933	6.4859	7.1649	2.762	2.3482	0.018862	0.38997	SYNPO2L	synaptopodin 2 like
23195	0.20815	3318.1	0.088685	2.3471	0.018922	0.3906	MDN1	midasin AAA ATPase 1
1937	-0.14254	29610	0.060762	-2.346	0.018979	0.39117	EEF1G	eukaryotic translation elongation factor 1 gamma
5660	0.1025	122370	0.043718	2.3446	0.019048	0.39157	PSAP	prosaposin
8455	0.19662	4661.9	0.083867	2.3444	0.019057	0.39157	ATRN	attractin
4714	-0.22676	2760	0.096784	-2.343	0.019132	0.3925	NDUFB8	NADH:ubiquinone oxidoreductase subunit B8
286256	5.7636	6.541	2.4612	2.3418	0.019192	0.39276	LCN12	lipocalin 12
5670	5.5302	9.1634	2.3618	2.3416	0.019203	0.39276	PSG2	pregnancy specific beta-1-glycoprotein 2
259173	0.29516	2133.6	0.1261	2.3407	0.019249	0.39311	ALS2CL	ALS2 C-terminal like
58487	0.26573	2698.2	0.11361	2.3389	0.019342	0.39439	CREBZF	CREB/ATF bZIP transcription factor
79676	-0.72557	359.63	0.31038	-2.3377	0.019404	0.39506	OGFOD2	2-oxoglutarate and iron dependent oxygenase domain containing 2
114881	0.37606	1260.7	0.16092	2.3369	0.019446	0.39531	OSBPL7	oxysterol binding protein like 7
6452	0.22029	4952.9	0.094461	2.332	0.019698	0.39925	SH3BP2	SH3 domain binding protein 2
29098	-0.57907	485.2	0.24835	-2.3316	0.01972	0.39925	RANGRF	RAN guanine nucleotide release factor
25851	0.17357	5291.9	0.07448	2.3304	0.019785	0.39925	TECPR1	tectonin beta-propeller repeat containing 1
93343	-0.41977	1293.4	0.18015	-2.3301	0.019801	0.39925	MVB12A	multivesicular body subunit 12A
225689	5.4603	8.9328	2.3435	2.33	0.019808	0.39925	MAPK15	mitogen-activated protein kinase 15
4282	-0.2227	6886.6	0.09559	-2.3298	0.019819	0.39925	MIF	macrophage migration inhibitory factor
1327	-0.15137	9170.6	0.064998	-2.3288	0.019869	0.39966	COX4I1	cytochrome c oxidase subunit 4I1
54619	0.47684	790.9	0.20481	2.3282	0.019902	0.39972	CCNJ	cyclin J
340152	-5.823	6.6471	2.5018	-2.3275	0.019937	0.39977	ZC3H12D	zinc finger CCCH-type containing 12D
100529261	-6.8651	7.7573	2.9502	-2.327	0.019964	0.39977	CHURC1-FNTB	CHURC1-FNTB readthrough
374928	-0.46504	750.12	0.20013	-2.3237	0.020143	0.40175	ZNF773	zinc finger protein 773
56851	-0.2371	3379.1	0.10204	-2.3237	0.020144	0.40175	EMC7	ER membrane protein complex subunit 7
141	-0.49002	599.17	0.2109	-2.3235	0.020153	0.40175	ADPRH	ADP-ribosylarginine hydrolase
440435	6.3168	7.246	2.7204	2.322	0.020231	0.40269	GPR179	G protein-coupled receptor 179
5412	-0.39217	1239.5	0.16895	-2.3212	0.020276	0.4028	UBL3	ubiquitin like 3
167691	-0.60555	444.47	0.26093	-2.3208	0.020299	0.4028	LCA5	lebercilin LCA5
23645	-0.15095	9193.9	0.065057	-2.3203	0.020327	0.4028	PPP1R15A	protein phosphatase 1 regulatory subunit 15A
91272	-0.27848	1860	0.12011	-2.3184	0.020425	0.4031	BOD1	biorientation of chromosomes in cell division 1
116211	-6.0967	5.1868	2.6297	-2.3184	0.020427	0.4031	TM4SF19	transmembrane 4 L six family member 19
79041	-0.68045	271.73	0.29355	-2.318	0.020449	0.4031	TMEM38A	transmembrane protein 38A
79649	0.25803	2263.8	0.11133	2.3177	0.020463	0.4031	MAP7D3	MAP7 domain containing 3
6431	0.20825	4811.4	0.089892	2.3166	0.020525	0.40372	SRSF6	serine and arginine rich splicing factor 6
599	0.22277	3184.8	0.096205	2.3156	0.020582	0.40426	BCL2L2	BCL2 like 2
2648	0.26535	1902.8	0.11483	2.3109	0.020839	0.4087	KAT2A	lysine acetyltransferase 2A
8507	0.36713	1339	0.15894	2.3098	0.020897	0.40924	ENC1	ectodermal-neural cortex 1
10458	-0.55453	468.01	0.24014	-2.3092	0.020933	0.40935	BAIAP2	BAR/IMD domain containing adaptor protein 2
8971	-0.219	3847.6	0.094906	-2.3075	0.021025	0.40981	H1-10	H1.10 linker histone
221806	6.0853	8.2675	2.6378	2.307	0.021055	0.40981	VWDE	von Willebrand factor D and EGF domains
57414	-0.28166	2362.3	0.1221	-2.3069	0.021062	0.40981	RHBDD2	rhomboid domain containing 2
27286	0.13249	9465.9	0.05744	2.3066	0.02108	0.40981	SRPX2	sushi repeat containing protein X-linked 2
51526	-0.32025	1428.7	0.13893	-2.3051	0.021163	0.41083	OSER1	oxidative stress responsive serine rich 1
80022	0.69102	269.87	0.29991	2.3041	0.021217	0.41128	MYO15B	myosin XVB
7468	0.20983	4198.4	0.091165	2.3016	0.021355	0.41287	NSD2	nuclear receptor binding SET domain protein 2
1209	-0.16572	6888.3	0.072004	-2.3015	0.021364	0.41287	CLPTM1	CLPTM1 regulator of GABA type A receptor forward trafficking
376497	-0.32038	1175.8	0.13924	-2.3009	0.021398	0.41287	SLC27A1	solute carrier family 27 member 1
64772	0.25059	2075.5	0.10895	2.3	0.021449	0.41287	ENGASE	endo-beta-N-acetylglucosaminidase
6834	-0.40489	801.72	0.17605	-2.2999	0.021453	0.41287	SURF1	SURF1 cytochrome c oxidase assembly factor
404216	-3.0418	17.608	1.3235	-2.2984	0.02154	0.41312	LINC01561	long intergenic non-protein coding RNA 1561
25932	0.10619	41478	0.046208	2.2982	0.021553	0.41312	CLIC4	chloride intracellular channel 4
197322	-0.285	1570.4	0.12402	-2.298	0.021559	0.41312	ACSF3	acyl-CoA synthetase family member 3
79969	0.45001	594.92	0.19589	2.2973	0.021601	0.41334	ATAT1	alpha tubulin acetyltransferase 1
2963	-0.4064	787.82	0.17706	-2.2953	0.021717	0.41412	GTF2F2	general transcription factor IIF subunit 2
89884	-5.7062	11.002	2.4862	-2.2951	0.021726	0.41412	LHX4	LIM homeobox 4
51491	-0.45312	687.14	0.19744	-2.295	0.021735	0.41412	NOP16	NOP16 nucleolar protein
162967	0.28353	1472.4	0.1236	2.2939	0.021798	0.41473	ZNF320	zinc finger protein 320
399979	0.15401	5768	0.067168	2.2929	0.021852	0.41515	SNX19	sorting nexin 19
51025	-0.69695	420.33	0.30404	-2.2923	0.021888	0.41525	PAM16	presequence translocase associated motor 16
55644	0.29684	1311.4	0.12955	2.2914	0.021943	0.4157	OSGEP	O-sialoglycoprotein endopeptidase
6208	-0.12977	21599	0.056656	-2.2905	0.02199	0.416	RPS14	ribosomal protein S14
5480	-0.28052	1991.4	0.12254	-2.2893	0.022064	0.41682	PPIC	peptidylprolyl isomerase C
468	-0.1465	11793	0.0641	-2.2855	0.022284	0.42038	ATF4	activating transcription factor 4
90678	-0.27192	2622.2	0.11912	-2.2826	0.022452	0.42295	LRSAM1	leucine rich repeat and sterile alpha motif containing 1
83854	-5.351	7.064	2.3452	-2.2816	0.022511	0.4232	ANGPTL6	angiopoietin like 6
8565	-0.16575	6073.9	0.072656	-2.2813	0.022529	0.4232	YARS1	tyrosyl-tRNA synthetase 1
283450	0.18134	5227.4	0.079561	2.2792	0.022654	0.42495	HECTD4	HECT domain E3 ubiquitin protein ligase 4
10058	-0.63565	802.86	0.27907	-2.2777	0.022742	0.42527	ABCB6	ATP binding cassette subfamily B member 6 (Langereis blood group)
146212	1.6806	47.76	0.738	2.2772	0.022774	0.42527	KCTD19	potassium channel tetramerization domain containing 19
8161	0.38382	818.56	0.16859	2.2766	0.022808	0.42527	COIL	coilin
284359	2.0085	34.308	0.88229	2.2765	0.022817	0.42527	IZUMO1	izumo sperm-egg fusion 1
6449	-0.23704	3515.8	0.10415	-2.2761	0.022842	0.42527	SGTA	small glutamine rich tetratricopeptide repeat containing alpha
81609	0.2782	1559.7	0.12226	2.2755	0.022874	0.42527	SNX27	sorting nexin 27
10180	0.23699	4275.1	0.10416	2.2752	0.022894	0.42527	RBM6	RNA binding motif protein 6
54749	-4.9625	7.9175	2.1819	-2.2744	0.022944	0.42561	EPDR1	ependymin related 1
1763	0.71192	247.42	0.31312	2.2736	0.02299	0.42587	DNA2	DNA replication helicase/nuclease 2
9791	-0.23204	2728.8	0.10209	-2.2729	0.023035	0.42612	PTDSS1	phosphatidylserine synthase 1
84897	0.28969	1986.8	0.1275	2.2721	0.02308	0.42636	TBRG1	transforming growth factor beta regulator 1
92002	-0.57385	430.18	0.25269	-2.271	0.023149	0.42704	CCNQ	cyclin Q
2590	0.18408	8153.7	0.081086	2.2702	0.023195	0.4273	GALNT2	polypeptide N-acetylgalactosaminyltransferase 2
9204	0.32869	1215.9	0.14489	2.2686	0.023291	0.42764	ZMYM6	zinc finger MYM-type containing 6
1059	-0.24662	4882.6	0.10874	-2.2681	0.023324	0.42764	CENPB	centromere protein B
728642	0.36117	1981.1	0.15925	2.2679	0.023333	0.42764	CDK11A	cyclin dependent kinase 11A
100529251	-5.4536	34.426	2.4048	-2.2678	0.023341	0.42764	CKLF-CMTM1	CKLF-CMTM1 readthrough
11093	0.55868	499.82	0.24663	2.2653	0.023497	0.42988	ADAMTS13	ADAM metallopeptidase with thrombospondin type 1 motif 13
440295	0.39374	800.13	0.17388	2.2645	0.023545	0.42988	GOLGA6L9	golgin A6 family like 9
55291	0.18416	3787.1	0.081336	2.2642	0.02356	0.42988	PPP6R3	protein phosphatase 6 regulatory subunit 3
30000	0.19312	4008.2	0.085328	2.2633	0.023619	0.43035	TNPO2	transportin 2
56142	-1.8408	63.984	0.81352	-2.2627	0.023653	0.43039	PCDHA6	protocadherin alpha 6
7306	6.1978	7.645	2.7401	2.2619	0.023702	0.4307	TYRP1	tyrosinase related protein 1
54872	0.19211	3747.8	0.085056	2.2587	0.023904	0.4331	PIGG	phosphatidylinositol glycan anchor biosynthesis class G
6741	-0.17174	5227.2	0.076049	-2.2583	0.023924	0.4331	SSB	small RNA binding exonuclease protection factor La
113655	-0.58032	432.05	0.25703	-2.2577	0.023961	0.4331	MFSD3	major facilitator superfamily domain containing 3
56943	0.27932	1788.5	0.12374	2.2572	0.023993	0.4331	ENY2	ENY2 transcription and export complex 2 subunit
84287	-0.31418	1780.7	0.13919	-2.2572	0.023996	0.4331	ZDHHC16	zinc finger DHHC-type palmitoyltransferase 16
23158	0.1555	5941.8	0.068935	2.2557	0.024087	0.43415	TBC1D9	TBC1 domain family member 9
4162	0.10563	87558	0.046872	2.2535	0.024225	0.43546	MCAM	melanoma cell adhesion molecule
7086	-0.17319	12521	0.076895	-2.2523	0.0243	0.43546	TKT	transketolase
9351	-0.27113	4001.5	0.12039	-2.2521	0.024315	0.43546	SLC9A3R2	SLC9A3 regulator 2
8518	0.27818	2479.2	0.12352	2.252	0.024322	0.43546	ELP1	elongator complex protein 1
54461	-0.19954	3811.2	0.088617	-2.2517	0.024339	0.43546	FBXW5	F-box and WD repeat domain containing 5
55890	5.8361	8.9461	2.5924	2.2512	0.024373	0.43546	GPRC5C	G protein-coupled receptor class C group 5 member C
5663	-0.18886	4168.5	0.083911	-2.2507	0.024402	0.43546	PSEN1	presenilin 1
2801	0.1656	5889.3	0.073584	2.2505	0.02442	0.43546	GOLGA2	golgin A2
84065	-0.28909	1879.9	0.12861	-2.2479	0.024584	0.4378	TMEM222	transmembrane protein 222
79905	0.5911	390.5	0.26306	2.247	0.024638	0.43816	TMC7	transmembrane channel like 7
26517	-0.26226	1758.4	0.11682	-2.2449	0.024776	0.44003	TIMM13	translocase of inner mitochondrial membrane 13
100131094	-5.9351	7.7855	2.6464	-2.2427	0.024913	0.44188	DPP9-AS1	DPP9 antisense RNA 1
55284	-0.30477	1757.7	0.13597	-2.2415	0.024996	0.44208	UBE2W	ubiquitin conjugating enzyme E2 W
9136	-0.37454	863.33	0.1672	-2.24	0.025088	0.44208	RRP9	"ribosomal RNA processing 9, U3 small nucleolar RNA binding protein"
57381	0.12942	11430	0.057778	2.2399	0.025096	0.44208	RHOJ	ras homolog family member J
1832	-5.3202	8.5315	2.3755	-2.2396	0.025114	0.44208	DSP	desmoplakin
286262	-0.4397	663.51	0.19635	-2.2394	0.025132	0.44208	TPRN	taperin
2023	-0.11388	40947	0.05086	-2.2391	0.025153	0.44208	ENO1	enolase 1
115111	-3.8011	13.64	1.6978	-2.2388	0.025167	0.44208	SLC26A7	solute carrier family 26 member 7
65251	-0.56649	358.72	0.25308	-2.2384	0.025195	0.44208	ZNF649	zinc finger protein 649
51231	-0.28014	1435.8	0.12517	-2.238	0.025222	0.44208	VRK3	VRK serine/threonine kinase 3
64135	-0.18213	4483.9	0.081405	-2.2373	0.025265	0.44225	IFIH1	interferon induced with helicase C domain 1
80323	0.36934	1058	0.16513	2.2367	0.025309	0.44244	CCDC68	coiled-coil domain containing 68
4774	-0.26479	1691.8	0.11853	-2.234	0.025485	0.44494	NFIA	nuclear factor I A
144811	0.22127	3546.2	0.099158	2.2315	0.025649	0.44594	LACC1	laccase domain containing 1
348013	-0.22716	2160.3	0.10184	-2.2305	0.025715	0.44594	TMEM255B	transmembrane protein 255B
55558	0.19281	5796.3	0.086457	2.2301	0.025742	0.44594	PLXNA3	plexin A3
5372	0.42725	599.42	0.19167	2.2291	0.025804	0.44594	PMM1	phosphomannomutase 1
29894	0.16037	6037.7	0.071952	2.2288	0.025825	0.44594	CPSF1	cleavage and polyadenylation specific factor 1
2086	0.21935	5901	0.098418	2.2288	0.025827	0.44594	ERV3-1	"endogenous retrovirus group 3 member 1, envelope"
6004	6.0434	7.3353	2.7122	2.2282	0.025865	0.44594	RGS16	regulator of G protein signaling 16
953	0.43905	702.83	0.19714	2.2271	0.025939	0.44594	ENTPD1	ectonucleoside triphosphate diphosphohydrolase 1
10959	-0.14027	8227.4	0.062982	-2.2271	0.02594	0.44594	TMED2	transmembrane p24 trafficking protein 2
54432	-0.45337	840.67	0.20357	-2.2271	0.025943	0.44594	YIPF1	Yip1 domain family member 1
25970	0.21225	2753.1	0.095311	2.2269	0.025956	0.44594	SH2B1	SH2B adaptor protein 1
10273	-0.20515	3786.5	0.092127	-2.2269	0.025957	0.44594	STUB1	STIP1 homology and U-box containing protein 1
6161	-0.16354	12562	0.07345	-2.2266	0.025977	0.44594	RPL32	ribosomal protein L32
25775	-6.391	5.878	2.875	-2.2229	0.026219	0.44953	C22orf24	chromosome 22 open reading frame 24
81492	-5.2434	5.9665	2.3607	-2.2211	0.026343	0.45033	RSPH6A	radial spoke head 6 homolog A
79957	0.88193	161.12	0.39707	2.2211	0.026345	0.45033	PAQR6	progestin and adipoQ receptor family member 6
58191	-0.2964	1488.7	0.13348	-2.2206	0.02638	0.45033	CXCL16	C-X-C motif chemokine ligand 16
357	0.38608	954.4	0.17389	2.2203	0.026401	0.45033	SHROOM2	shroom family member 2
4242	-0.20483	4516.9	0.092297	-2.2193	0.026468	0.45045	MFNG	MFNG O-fucosylpeptide 3-beta-N-acetylglucosaminyltransferase
3455	0.30163	2198.7	0.13595	2.2187	0.02651	0.45045	IFNAR2	interferon alpha and beta receptor subunit 2
23423	-0.20894	3752.6	0.094189	-2.2183	0.026535	0.45045	TMED3	transmembrane p24 trafficking protein 3
84267	-0.62892	342.87	0.28353	-2.2182	0.026542	0.45045	C9orf64	chromosome 9 open reading frame 64
10555	-0.26293	2235.5	0.11865	-2.216	0.026694	0.45175	AGPAT2	1-acylglycerol-3-phosphate O-acyltransferase 2
26574	-0.26135	1969.3	0.11794	-2.2159	0.026698	0.45175	AATF	apoptosis antagonizing transcription factor
90853	0.21347	3514.2	0.096362	2.2153	0.026738	0.45175	SPOCD1	SPOC domain containing 1
4089	-0.18635	3518.6	0.084129	-2.2151	0.026754	0.45175	SMAD4	SMAD family member 4
23670	0.21562	2977.3	0.097383	2.2141	0.026822	0.45231	CEMIP2	cell migration inducing hyaluronidase 2
169044	-6.7047	6.7553	3.0316	-2.2116	0.026994	0.45445	COL22A1	collagen type XXII alpha 1 chain
3553	0.33172	1307.1	0.15004	2.2108	0.027051	0.45445	IL1B	interleukin 1 beta
374868	-0.33318	1060.3	0.15071	-2.2107	0.027056	0.45445	ATP9B	ATPase phospholipid transporting 9B (putative)
3572	0.12802	22089	0.057919	2.2103	0.027085	0.45445	IL6ST	interleukin 6 signal transducer
5787	0.11231	21045	0.050893	2.2069	0.027322	0.45706	PTPRB	protein tyrosine phosphatase receptor type B
84914	0.21056	3049.1	0.095423	2.2066	0.027343	0.45706	ZNF587	zinc finger protein 587
4804	1.8122	35.348	0.82126	2.2066	0.027343	0.45706	NGFR	nerve growth factor receptor
64848	0.25622	1960.7	0.11621	2.2048	0.02747	0.45861	YTHDC2	YTH domain containing 2
7597	0.33593	943.8	0.15243	2.2038	0.027536	0.45914	ZBTB25	zinc finger and BTB domain containing 25
148223	-0.3709	944.74	0.16843	-2.2021	0.027658	0.45982	C19orf25	chromosome 19 open reading frame 25
55850	-0.52398	585.88	0.238	-2.2016	0.027694	0.45982	USE1	unconventional SNARE in the ER 1
5365	0.23108	2716.1	0.10496	2.2015	0.0277	0.45982	PLXNB3	plexin B3
9167	-0.24891	3401.7	0.11307	-2.2013	0.027714	0.45982	COX7A2L	cytochrome c oxidase subunit 7A2 like
6418	-0.1268	11933	0.057635	-2.2	0.027807	0.46079	SET	SET nuclear proto-oncogene
54434	0.13121	10446	0.059661	2.1993	0.027855	0.461	SSH1	slingshot protein phosphatase 1
54542	0.17903	5198.6	0.081447	2.1981	0.027939	0.46137	RC3H2	ring finger and CCCH-type domains 2
6136	-0.11929	15600	0.054273	-2.1979	0.027953	0.46137	RPL12	ribosomal protein L12
5172	1.4501	50.416	0.65985	2.1976	0.027981	0.46137	SLC26A4	solute carrier family 26 member 4
200424	-0.25757	1819.4	0.11727	-2.1964	0.028063	0.46164	TET3	tet methylcytosine dioxygenase 3
83872	0.35744	801.85	0.16274	2.1964	0.028066	0.46164	HMCN1	hemicentin 1
2037	0.19418	4728.6	0.088432	2.1958	0.028105	0.46171	EPB41L2	erythrocyte membrane protein band 4.1 like 2
5565	0.29678	1533	0.13521	2.1949	0.028169	0.46219	PRKAB2	protein kinase AMP-activated non-catalytic subunit beta 2
56951	0.24136	1910.6	0.11004	2.1934	0.028276	0.46282	C5orf15	chromosome 5 open reading frame 15
8844	0.24987	3067.5	0.11395	2.1928	0.028319	0.46282	KSR1	kinase suppressor of ras 1
293	-0.15996	6694.8	0.072975	-2.192	0.028378	0.46282	SLC25A6	solute carrier family 25 member 6
79937	0.21685	4072.5	0.098949	2.1915	0.028413	0.46282	CNTNAP3	contactin associated protein family member 3
133584	-0.92277	139.19	0.42113	-2.1911	0.028442	0.46282	EGFLAM	"EGF like, fibronectin type III and laminin G domains"
283131	-0.49296	124420	0.22504	-2.1905	0.028488	0.46282	NEAT1	nuclear paraspeckle assembly transcript 1
5864	-1.3034	72.464	0.59527	-2.1895	0.028559	0.46282	RAB3A	"RAB3A, member RAS oncogene family"
29924	-0.18528	6835.7	0.084636	-2.1892	0.028584	0.46282	EPN1	epsin 1
256472	-3.2364	13.523	1.4785	-2.189	0.028597	0.46282	TMEM151A	transmembrane protein 151A
51474	0.17956	5065.9	0.082044	2.1886	0.028623	0.46282	LIMA1	LIM domain and actin binding 1
29844	-0.38216	1098.1	0.17462	-2.1885	0.028632	0.46282	TFPT	TCF3 fusion partner
11054	-0.19557	4676.9	0.08939	-2.1879	0.028679	0.46282	OGFR	opioid growth factor receptor
92579	-0.27663	2062.9	0.12645	-2.1877	0.028691	0.46282	G6PC3	glucose-6-phosphatase catalytic subunit 3
1521	-6.4554	5.0172	2.9514	-2.1872	0.028724	0.46282	CTSW	cathepsin W
1191	-0.15111	14582	0.069087	-2.1872	0.028727	0.46282	CLU	clusterin
7262	-0.35976	1029.6	0.16454	-2.1864	0.028786	0.46321	PHLDA2	pleckstrin homology like domain family A member 2
64599	0.17293	6255	0.079162	2.1845	0.028928	0.46482	GIGYF1	GRB10 interacting GYF protein 1
26156	-0.21611	4551.3	0.098951	-2.184	0.028963	0.46482	RSL1D1	ribosomal L1 domain containing 1
80006	0.37151	799.08	0.17015	2.1835	0.028999	0.46482	TRAPPC13	trafficking protein particle complex 13
272	0.32189	1058.6	0.14744	2.1831	0.029025	0.46482	AMPD3	adenosine monophosphate deaminase 3
9820	0.229	2880.8	0.10496	2.1818	0.029127	0.46561	CUL7	cullin 7
3714	0.2085	4865.9	0.095577	2.1815	0.029144	0.46561	JAG2	jagged canonical Notch ligand 2
25940	0.28318	3032.4	0.12992	2.1797	0.029283	0.46698	FAM98A	family with sequence similarity 98 member A
115708	-0.48086	588.97	0.22073	-2.1785	0.029371	0.46698	TRMT61A	tRNA methyltransferase 61A
10964	-0.12438	16473	0.057102	-2.1781	0.029396	0.46698	IFI44L	interferon induced protein 44 like
7296	-0.083322	86095	0.038258	-2.1779	0.029414	0.46698	TXNRD1	thioredoxin reductase 1
7431	-0.10284	248480	0.047222	-2.1779	0.029417	0.46698	VIM	vimentin
58472	-0.26727	2031.2	0.12274	-2.1775	0.02944	0.46698	SQOR	sulfide quinone oxidoreductase
6147	-0.18615	10682	0.085527	-2.1765	0.029521	0.46752	RPL23A	ribosomal protein L23a
3911	0.1331	12628	0.061165	2.1762	0.029544	0.46752	LAMA5	laminin subunit alpha 5
79026	0.12299	92156	0.056549	2.1749	0.029637	0.46818	AHNAK	AHNAK nucleoprotein
23221	-0.46951	854.54	0.2159	-2.1746	0.029657	0.46818	RHOBTB2	Rho related BTB domain containing 2
51382	-0.26524	2378.9	0.12201	-2.174	0.029707	0.46818	ATP6V1D	ATPase H+ transporting V1 subunit D
57018	0.20016	5195.9	0.09208	2.1737	0.029726	0.46818	CCNL1	cyclin L1
85358	0.15729	14747	0.072424	2.1718	0.029874	0.46997	SHANK3	SH3 and multiple ankyrin repeat domains 3
7070	-5.7425	5.9588	2.6451	-2.171	0.029931	0.47031	THY1	Thy-1 cell surface antigen
25766	0.59904	477.45	0.27619	2.1689	0.030088	0.47222	PRPF40B	pre-mRNA processing factor 40 homolog B
10101	-0.24936	1689.3	0.11505	-2.1674	0.030207	0.47322	NUBP2	nucleotide binding protein 2
7027	0.22082	3195.4	0.10189	2.1672	0.030223	0.47322	TFDP1	transcription factor Dp-1
138050	0.1854	4449.3	0.085587	2.1662	0.030299	0.47385	HGSNAT	heparan-alpha-glucosaminide N-acetyltransferase
124976	0.38185	1011.3	0.17632	2.1657	0.030334	0.47385	SPNS2	sphingolipid transporter 2
53	-0.25734	1722.6	0.11891	-2.1642	0.030451	0.47471	ACP2	"acid phosphatase 2, lysosomal"
23787	-0.138	11181	0.063771	-2.1641	0.03046	0.47471	MTCH1	mitochondrial carrier 1
80737	-4.8015	10.002	2.2199	-2.1629	0.03055	0.47556	VWA7	von Willebrand factor A domain containing 7
9647	0.14792	7917.6	0.068416	2.1621	0.030613	0.47598	PPM1F	"protein phosphatase, Mg2+/Mn2+ dependent 1F"
1121	0.28814	1504.8	0.13331	2.1615	0.03066	0.47611	CHM	CHM Rab escort protein
6484	-0.41217	831.16	0.19073	-2.161	0.030693	0.47611	ST3GAL4	"ST3 beta-galactoside alpha-2,3-sialyltransferase 4"
308	-0.1125	26023	0.052101	-2.1593	0.030829	0.47668	ANXA5	annexin A5
5605	-0.18198	5340.6	0.084295	-2.1588	0.030864	0.47668	MAP2K2	mitogen-activated protein kinase kinase 2
124637	-0.75116	271.35	0.34796	-2.1587	0.030871	0.47668	CYB5D1	cytochrome b5 domain containing 1
513	-0.22909	2171	0.10615	-2.1583	0.030906	0.47668	ATP5F1D	ATP synthase F1 subunit delta
221424	2.6864	21.362	1.2448	2.1581	0.030921	0.47668	LRRC73	leucine rich repeat containing 73
9990	0.21434	3236.3	0.099334	2.1578	0.030944	0.47668	SLC12A6	solute carrier family 12 member 6
55658	-0.24613	1910.4	0.11411	-2.157	0.031007	0.4771	RNF126	ring finger protein 126
84302	-2.3445	24.394	1.0877	-2.1555	0.031122	0.47813	PGAP4	post-GPI attachment to proteins GalNAc transferase 4
80011	0.2617	1992.4	0.12144	2.1549	0.031171	0.47813	PSME3IP1	proteasome activator subunit 3 interacting protein 1
2054	0.2882	1823.7	0.13377	2.1544	0.031207	0.47813	STX2	syntaxin 2
6168	-0.1599	20875	0.074222	-2.1543	0.031217	0.47813	RPL37A	ribosomal protein L37a
51070	-0.246	1919.1	0.11431	-2.1521	0.03139	0.48023	NOSIP	nitric oxide synthase interacting protein
113235	0.74836	186.53	0.34797	2.1507	0.031503	0.48114	SLC46A1	solute carrier family 46 member 1
10048	0.25656	1696	0.11933	2.1499	0.031562	0.48114	RANBP9	RAN binding protein 9
23165	0.21385	2720.8	0.0995	2.1493	0.031613	0.48114	NUP205	nucleoporin 205
3750	0.88415	125.82	0.41142	2.149	0.031633	0.48114	KCND1	potassium voltage-gated channel subfamily D member 1
23033	0.28346	1695.7	0.1319	2.149	0.031638	0.48114	DOP1A	DOP1 leucine zipper like protein A
64792	-0.49685	435.69	0.23124	-2.1486	0.031666	0.48114	IFT22	intraflagellar transport 22
1117	5.8283	8.0446	2.7132	2.1481	0.031705	0.48114	CHI3L2	chitinase 3 like 2
55670	-0.21907	2826.3	0.10202	-2.1473	0.031768	0.48114	PEX26	peroxisomal biogenesis factor 26
10211	-0.15299	7419.4	0.071247	-2.1473	0.031773	0.48114	FLOT1	flotillin 1
27148	0.23958	1934.5	0.11162	2.1464	0.031842	0.48164	STK36	serine/threonine kinase 36
9757	0.18353	4300.2	0.085545	2.1454	0.031918	0.48224	KMT2B	lysine methyltransferase 2B
54584	-0.7142	218.58	0.33325	-2.1431	0.032103	0.4831	GNB1L	G protein subunit beta 1 like
23420	0.12748	8760.6	0.059488	2.143	0.032115	0.4831	NOMO1	NODAL modulator 1
8487	0.68051	218.33	0.31761	2.1426	0.032145	0.4831	GEMIN2	gem nuclear organelle associated protein 2
9500	0.19183	5832.3	0.089533	2.1425	0.032152	0.4831	MAGED1	MAGE family member D1
23233	0.22819	3166.7	0.10651	2.1425	0.032156	0.4831	EXOC6B	exocyst complex component 6B
64223	-0.29871	1222.8	0.13947	-2.1417	0.032219	0.48351	MLST8	"MTOR associated protein, LST8 homolog"
9695	0.15945	6547.8	0.074537	2.1393	0.032415	0.48525	EDEM1	ER degradation enhancing alpha-mannosidase like protein 1
284427	5.8898	6.7428	2.7533	2.1392	0.03242	0.48525	SLC25A41	solute carrier family 25 member 41
93436	-0.29431	1339.4	0.1376	-2.1389	0.032444	0.48525	ARMC6	armadillo repeat containing 6
1604	0.13719	7529.5	0.064202	2.1368	0.032611	0.48629	CD55	CD55 molecule (Cromer blood group)
55361	-0.23069	2380.6	0.10797	-2.1367	0.032622	0.48629	PI4K2A	phosphatidylinositol 4-kinase type 2 alpha
286343	-0.51025	390.32	0.23881	-2.1367	0.032623	0.48629	LURAP1L	leucine rich adaptor protein 1 like
51312	0.1717	6293.4	0.080525	2.1323	0.032985	0.4905	SLC25A37	solute carrier family 25 member 37
8776	0.2576	1656.9	0.12082	2.1321	0.032997	0.4905	MTMR1	myotubularin related protein 1
727897	6.0374	6.3651	2.8319	2.1319	0.033016	0.4905	MUC5B	"mucin 5B, oligomeric mucus/gel-forming"
1896	0.72161	208.76	0.33862	2.1311	0.033083	0.49096	EDA	ectodysplasin A
595	0.097995	38577	0.045993	2.1306	0.03312	0.49096	CCND1	cyclin D1
83547	-0.59428	360.77	0.2793	-2.1278	0.033358	0.49305	RILP	Rab interacting lysosomal protein
100529097	-8.2942	188.08	3.8986	-2.1275	0.03338	0.49305	RPL36A-HNRNPH2	RPL36A-HNRNPH2 readthrough
3294	-0.42024	552.01	0.19756	-2.1272	0.033406	0.49305	HSD17B2	hydroxysteroid 17-beta dehydrogenase 2
1903	-0.2635	1504.6	0.12388	-2.1271	0.033409	0.49305	S1PR3	sphingosine-1-phosphate receptor 3
58492	0.71076	219.87	0.3343	2.1261	0.033491	0.49372	ZNF77	zinc finger protein 77
79143	-0.1953	10654	0.091884	-2.1255	0.033548	0.49401	MBOAT7	membrane bound O-acyltransferase domain containing 7
7264	-0.26067	1975.3	0.12269	-2.1246	0.033619	0.49451	TSTA3	tissue specific transplantation antigen P35B
7586	0.14438	7153.5	0.067995	2.1234	0.033716	0.49497	ZKSCAN1	zinc finger with KRAB and SCAN domains 1
26000	-0.17974	3954	0.084649	-2.1234	0.033724	0.49497	TBC1D10B	TBC1 domain family member 10B
80311	-0.51689	402.1	0.24349	-2.1229	0.033766	0.49503	KLHL15	kelch like family member 15
7544	-0.39823	688.05	0.18764	-2.1223	0.03381	0.49503	ZFY	zinc finger protein Y-linked
10533	-0.3047	1727.8	0.14359	-2.122	0.033839	0.49503	ATG7	autophagy related 7
79755	-5.9028	6.8057	2.7824	-2.1215	0.033878	0.49504	ZNF750	zinc finger protein 750
84182	0.99995	174.34	0.47177	2.1196	0.034043	0.49691	MINDY4	MINDY lysine 48 deubiquitinase 4
6888	-0.12779	11173	0.060343	-2.1177	0.0342	0.49838	TALDO1	transaldolase 1
9133	-2.3246	21.122	1.0978	-2.1175	0.034218	0.49838	CCNB2	cyclin B2
5795	-0.30055	1337.7	0.14203	-2.1161	0.034337	0.49957	PTPRJ	protein tyrosine phosphatase receptor type J
7593	0.28419	1597.6	0.13439	2.1146	0.034463	0.50086	MZF1	myeloid zinc finger 1
472	0.19356	4592	0.091617	2.1127	0.034627	0.501	ATM	ATM serine/threonine kinase
126295	-0.83505	159.3	0.3954	-2.1119	0.034696	0.501	ZNF57	zinc finger protein 57
1036	1.5114	69.283	0.71592	2.1112	0.034756	0.501	CDO1	cysteine dioxygenase type 1
10969	-0.28307	1752.3	0.13409	-2.1111	0.034765	0.501	EBNA1BP2	EBNA1 binding protein 2
5499	-0.18078	3533.2	0.085649	-2.1107	0.034795	0.501	PPP1CA	protein phosphatase 1 catalytic subunit alpha
64651	-0.3009	1199.9	0.14257	-2.1106	0.03481	0.501	CSRNP1	cysteine and serine rich nuclear protein 1
161198	-0.14004	13288	0.066357	-2.1103	0.034829	0.501	CLEC14A	C-type lectin domain containing 14A
4831	-0.23264	6807	0.11025	-2.1102	0.034839	0.501	NME2	NME/NM23 nucleoside diphosphate kinase 2
28996	-0.17102	6460.1	0.081053	-2.1099	0.034864	0.501	HIPK2	homeodomain interacting protein kinase 2
5430	0.16194	9354.4	0.076753	2.1099	0.03487	0.501	POLR2A	RNA polymerase II subunit A
26284	-0.29516	1511.9	0.13992	-2.1095	0.034905	0.501	ERAL1	Era like 12S mitochondrial rRNA chaperone 1
81631	-0.12241	12160	0.058035	-2.1092	0.034923	0.501	MAP1LC3B	microtubule associated protein 1 light chain 3 beta
7107	-0.34676	1007.5	0.16459	-2.1067	0.03514	0.50315	GPR137B	G protein-coupled receptor 137B
5352	0.12176	17843	0.05783	2.1055	0.035247	0.50315	PLOD2	"procollagen-lysine,2-oxoglutarate 5-dioxygenase 2"
90673	-0.60281	299.3	0.28631	-2.1055	0.035249	0.50315	PPP1R3E	protein phosphatase 1 regulatory subunit 3E
5874	1.3235	66.272	0.62859	2.1054	0.035252	0.50315	RAB27B	"RAB27B, member RAS oncogene family"
11259	-0.16347	5749.7	0.077658	-2.105	0.03529	0.50315	FILIP1L	filamin A interacting protein 1 like
138881	1.1256	107.35	0.53474	2.1049	0.035299	0.50315	OR1L8	olfactory receptor family 1 subfamily L member 8
10994	-0.20348	2798.9	0.096755	-2.103	0.035462	0.50464	ILVBL	ilvB acetolactate synthase like
23527	0.18907	4398.8	0.089913	2.1028	0.035479	0.50464	ACAP2	"ArfGAP with coiled-coil, ankyrin repeat and PH domains 2"
9711	0.2502	2054.8	0.11901	2.1022	0.035534	0.50489	RUBCN	rubicon autophagy regulator
85450	-0.14711	6824.3	0.070028	-2.1007	0.03567	0.50589	ITPRIP	"inositol 1,4,5-trisphosphate receptor interacting protein"
56655	-0.61943	340.28	0.29492	-2.1004	0.035697	0.50589	POLE4	"DNA polymerase epsilon 4, accessory subunit"
79868	0.33529	1273.7	0.15965	2.1001	0.035718	0.50589	ALG13	ALG13 UDP-N-acetylglucosaminyltransferase subunit
163175	-6.7464	5.8286	3.2137	-2.0992	0.035796	0.50645	LGI4	leucine rich repeat LGI family member 4
254863	-0.53672	354.57	0.25573	-2.0988	0.035835	0.50647	TMEM256	transmembrane protein 256
63977	0.48979	522.68	0.23352	2.0974	0.035959	0.50649	PRDM15	PR/SET domain 15
752	0.69911	244.78	0.3334	2.0969	0.036001	0.50649	FMNL1	formin like 1
8828	0.098248	28790	0.04686	2.0966	0.036027	0.50649	NRP2	neuropilin 2
57088	0.22053	2380.7	0.10519	2.0966	0.03603	0.50649	PLSCR4	phospholipid scramblase 4
79033	-0.27445	1392.2	0.13091	-2.0965	0.036037	0.50649	ERI3	ERI1 exoribonuclease family member 3
9898	0.15052	9515.7	0.071805	2.0962	0.036067	0.50649	UBAP2L	ubiquitin associated protein 2 like
2787	-0.21974	2989.1	0.10485	-2.0958	0.036102	0.50649	GNG5	G protein subunit gamma 5
1933	-0.15524	6509.5	0.074148	-2.0937	0.036286	0.50789	EEF1B2	eukaryotic translation elongation factor 1 beta 2
7058	1.637	63.581	0.78189	2.0936	0.036296	0.50789	THBS2	thrombospondin 2
7376	-0.23063	3659.4	0.11018	-2.0933	0.036326	0.50789	NR1H2	nuclear receptor subfamily 1 group H member 2
7733	0.76815	261.33	0.36702	2.0929	0.036354	0.50789	ZNF180	zinc finger protein 180
63901	0.21327	2844.3	0.10202	2.0903	0.036587	0.50964	FAM111A	family with sequence similarity 111 member A
348327	0.84699	142.81	0.40519	2.0903	0.036587	0.50964	ZNF530	zinc finger protein 530
200942	-0.24649	2305.8	0.11793	-2.0901	0.036607	0.50964	KLHDC8B	kelch domain containing 8B
5681	-0.25226	1954.7	0.12071	-2.0898	0.036632	0.50964	PSKH1	protein serine kinase H1
284106	-0.41414	864.97	0.19823	-2.0892	0.036691	0.50967	CISD3	CDGSH iron sulfur domain 3
162968	1.3193	68.604	0.63162	2.0887	0.036731	0.50967	ZNF497	zinc finger protein 497
23117	0.19522	2898.9	0.093485	2.0882	0.036776	0.50967	NPIPB3	nuclear pore complex interacting protein family member B3
643707	0.44527	523.51	0.21324	2.0881	0.036787	0.50967	GOLGA6L4	golgin A6 family like 4
64783	-0.39161	832.31	0.1877	-2.0863	0.036948	0.51071	RBM15	RNA binding motif protein 15
9314	-0.34862	1012.7	0.1671	-2.0863	0.036956	0.51071	KLF4	Kruppel like factor 4
9741	0.14266	9464.8	0.068396	2.0858	0.037001	0.51071	LAPTM4A	lysosomal protein transmembrane 4 alpha
4715	-0.23569	2155.7	0.11301	-2.0856	0.037015	0.51071	NDUFB9	NADH:ubiquinone oxidoreductase subunit B9
6642	0.1448	5793.4	0.069455	2.0848	0.037083	0.51077	SNX1	sorting nexin 1
89932	0.15466	6780.3	0.074201	2.0844	0.037123	0.51077	PAPLN	"papilin, proteoglycan like sulfated glycoprotein"
4736	-0.14131	11129	0.067799	-2.0843	0.037134	0.51077	RPL10A	ribosomal protein L10a
10174	-0.19699	3575.9	0.094698	-2.0802	0.037509	0.5154	SORBS3	sorbin and SH3 domain containing 3
389084	-1.0646	105.08	0.51189	-2.0797	0.037549	0.51542	SNORC	secondary ossification center associated regulator of chondrocyte maturation
7378	-0.25682	3116.8	0.12354	-2.0788	0.037633	0.51577	UPP1	uridine phosphorylase 1
22895	6.2422	4.5284	3.003	2.0786	0.037651	0.51577	RPH3A	rabphilin 3A
64429	0.25002	1922.4	0.12032	2.078	0.037712	0.51607	ZDHHC6	zinc finger DHHC-type palmitoyltransferase 6
54453	0.15372	4598.3	0.074051	2.0758	0.037912	0.51791	RIN2	Ras and Rab interactor 2
23543	0.16893	7040.1	0.081387	2.0757	0.037924	0.51791	RBFOX2	RNA binding fox-1 homolog 2
29883	-0.21731	2986	0.10474	-2.0749	0.038	0.51824	CNOT7	CCR4-NOT transcription complex subunit 7
6421	0.12193	10212	0.058773	2.0746	0.038026	0.51824	SFPQ	splicing factor proline and glutamine rich
4017	0.10279	23219	0.049584	2.0731	0.038163	0.51843	LOXL2	lysyl oxidase like 2
57600	-0.23513	1949	0.11343	-2.073	0.038175	0.51843	FNIP2	folliculin interacting protein 2
3763	-5.4556	4.8086	2.6324	-2.0724	0.038224	0.51843	KCNJ6	potassium inwardly rectifying channel subfamily J member 6
11173	0.17226	8781	0.083122	2.0724	0.038227	0.51843	ADAMTS7	ADAM metallopeptidase with thrombospondin type 1 motif 7
57189	0.18895	4102.3	0.091176	2.0723	0.038234	0.51843	DENND11	DENN domain containing 11
7448	-6.122	5.3594	2.9567	-2.0706	0.038399	0.52014	VTN	vitronectin
6158	-0.10712	22674	0.051752	-2.0699	0.038458	0.52041	RPL28	ribosomal protein L28
51643	-0.21774	2504.3	0.10522	-2.0693	0.038514	0.52064	TMBIM4	transmembrane BAX inhibitor motif containing 4
10811	0.55628	321.12	0.26901	2.0679	0.038647	0.52191	NOXA1	NADPH oxidase activator 1
27339	-0.22306	3127.8	0.10789	-2.0675	0.038687	0.52192	PRPF19	pre-mRNA processing factor 19
63951	1.2008	87.552	0.58115	2.0663	0.038799	0.5229	DMRTA1	DMRT like family A1
55236	0.17316	4368.5	0.083831	2.0656	0.038865	0.52312	UBA6	ubiquitin like modifier activating enzyme 6
22884	0.2176	2142.8	0.10536	2.0653	0.038893	0.52312	WDR37	WD repeat domain 37
8574	-0.30085	1136.2	0.14576	-2.064	0.039013	0.52421	AKR7A2	aldo-keto reductase family 7 member A2
9667	0.17714	4440.2	0.085877	2.0628	0.039135	0.52531	SAFB2	scaffold attachment factor B2
284451	-6.3723	7.0473	3.0918	-2.061	0.039303	0.52668	ODF3L2	outer dense fiber of sperm tails 3 like 2
54741	0.14914	5263.4	0.07237	2.0609	0.039315	0.52668	LEPROT	leptin receptor overlapping transcript
285613	-0.5088	502.36	0.24701	-2.0599	0.039411	0.52743	RELL2	RELT like 2
51507	-0.19312	3156.4	0.093793	-2.059	0.039492	0.52757	RTF2	replication termination factor 2
6773	0.12639	7984.5	0.061388	2.0589	0.039501	0.52757	STAT2	signal transducer and activator of transcription 2
133558	6.1231	4.9231	2.9754	2.0579	0.039598	0.52834	MROH2B	maestro heat like repeat family member 2B
10184	-0.13423	6810.8	0.065263	-2.0567	0.039712	0.52933	LHFPL2	LHFPL tetraspan subfamily member 2
80005	0.21778	2397.4	0.10594	2.0557	0.039814	0.53017	DOCK5	dedicator of cytokinesis 5
84275	-0.50613	365.37	0.2463	-2.0549	0.039888	0.53062	SLC25A33	solute carrier family 25 member 33
23352	0.10338	26323	0.050324	2.0544	0.039938	0.53065	UBR4	ubiquitin protein ligase E3 component n-recognin 4
10010	0.16559	4135	0.080644	2.0533	0.040043	0.53065	TANK	TRAF family member associated NFKB activator
23098	-0.43966	562.49	0.21414	-2.0531	0.040059	0.53065	SARM1	sterile alpha and TIR motif containing 1
9230	-0.20229	3184.4	0.098545	-2.0527	0.040099	0.53065	RAB11B	"RAB11B, member RAS oncogene family"
5245	-0.19263	4222.1	0.093859	-2.0524	0.040134	0.53065	PHB	prohibitin
84952	0.21863	3025.3	0.10654	2.052	0.040166	0.53065	CGNL1	cingulin like 1
26751	0.32017	1226.7	0.15604	2.0518	0.04019	0.53065	SH3YL1	SH3 and SYLF domain containing 1
54520	0.19062	4403.3	0.092949	2.0508	0.040288	0.53065	CCDC93	coiled-coil domain containing 93
92595	-0.48207	386.15	0.23507	-2.0507	0.040292	0.53065	ZNF764	zinc finger protein 764
285268	0.26245	1948.6	0.12799	2.0505	0.040314	0.53065	ZNF621	zinc finger protein 621
4485	0.62701	309.97	0.30585	2.0501	0.040359	0.53065	MST1	macrophage stimulating 1
2113	0.13901	8995	0.06781	2.05	0.040367	0.53065	ETS1	"ETS proto-oncogene 1, transcription factor"
7568	-0.90222	148.96	0.44031	-2.0491	0.040457	0.53078	ZNF20	zinc finger protein 20
92714	0.29386	1291.3	0.14342	2.049	0.040462	0.53078	ARRDC1	arrestin domain containing 1
6386	-0.12079	13189	0.058973	-2.0483	0.040534	0.53078	SDCBP	syndecan binding protein
285203	0.18496	3485	0.090302	2.0482	0.040536	0.53078	EOGT	EGF domain specific O-linked N-acetylglucosamine transferase
64167	-0.40136	897.17	0.19604	-2.0473	0.040628	0.53112	ERAP2	endoplasmic reticulum aminopeptidase 2
84279	-0.62643	362.1	0.30611	-2.0464	0.040716	0.53112	PRADC1	protease associated domain containing 1
64852	0.32843	991.88	0.16049	2.0464	0.04072	0.53112	TUT1	"terminal uridylyl transferase 1, U6 snRNA-specific"
85028	0.35481	925.42	0.17339	2.0464	0.040721	0.53112	SNHG12	small nucleolar RNA host gene 12
57644	-2.9671	14.146	1.4509	-2.045	0.040853	0.53232	MYH7B	myosin heavy chain 7B
26045	-6.2025	7.0327	3.0341	-2.0442	0.040931	0.53283	LRRTM2	leucine rich repeat transmembrane neuronal 2
8339	-1.9435	28.872	0.95118	-2.0432	0.041029	0.5331	H2BC8	H2B clustered histone 8
221908	0.35175	824.01	0.17216	2.0432	0.041032	0.5331	PPP1R35	protein phosphatase 1 regulatory subunit 35
220	0.21865	2236.7	0.10705	2.0425	0.0411	0.53346	ALDH1A3	aldehyde dehydrogenase 1 family member A3
29928	-0.30537	1367.8	0.14954	-2.0421	0.041143	0.5335	TIMM22	translocase of inner mitochondrial membrane 22
22900	0.13224	9342.7	0.064796	2.0408	0.041268	0.53442	CARD8	caspase recruitment domain family member 8
84243	-0.22646	1842.6	0.11098	-2.0406	0.041294	0.53442	ZDHHC18	zinc finger DHHC-type palmitoyltransferase 18
56164	-5.6871	7.1708	2.7876	-2.0401	0.041336	0.53444	STK31	serine/threonine kinase 31
375056	0.17469	3486.9	0.085674	2.039	0.041446	0.53535	MIA3	MIA SH3 domain ER export factor 3
5452	0.19745	2634.3	0.096905	2.0375	0.041599	0.53681	POU2F2	POU class 2 homeobox 2
6472	-0.16751	5325.1	0.082264	-2.0362	0.041726	0.5376	SHMT2	serine hydroxymethyltransferase 2
56915	-0.56787	334.83	0.2789	-2.0361	0.041741	0.5376	EXOSC5	exosome component 5
2120	0.28379	1407.9	0.13945	2.0351	0.041843	0.5384	ETV6	ETS variant transcription factor 6
55705	0.14618	6086.4	0.071883	2.0335	0.041998	0.53987	IPO9	importin 9
22949	-0.11665	11790	0.05738	-2.0329	0.042067	0.54016	PTGR1	prostaglandin reductase 1
822	-0.36886	687.66	0.18148	-2.0325	0.042101	0.54016	CAPG	"capping actin protein, gelsolin like"
54997	-5.7879	5.9245	2.8485	-2.0319	0.042159	0.54038	TESC	tescalcin
29997	-0.17355	8723.6	0.085466	-2.0306	0.042297	0.541	NOP53	NOP53 ribosome biogenesis factor
55681	0.17616	3518.2	0.086854	2.0282	0.042537	0.541	SCYL2	SCY1 like pseudokinase 2
1969	0.13177	12504	0.064973	2.0281	0.042553	0.541	EPHA2	EPH receptor A2
113179	-1.1217	209.99	0.55325	-2.0275	0.042616	0.541	ADAT3	adenosine deaminase tRNA specific 3
90637	-0.42543	953.44	0.20989	-2.0269	0.042674	0.541	ZFAND2A	zinc finger AN1-type containing 2A
9942	-0.53906	398.81	0.26602	-2.0264	0.042723	0.541	XYLB	xylulokinase
56898	0.26559	1423	0.13108	2.0262	0.042743	0.541	BDH2	3-hydroxybutyrate dehydrogenase 2
4855	0.15467	6937.9	0.076358	2.0256	0.042801	0.541	NOTCH4	notch receptor 4
5834	-0.13831	5824	0.068284	-2.0255	0.042814	0.541	PYGB	glycogen phosphorylase B
63933	-0.38439	810.36	0.18981	-2.0251	0.042857	0.541	MCUR1	mitochondrial calcium uniporter regulator 1
23759	0.23993	2208.7	0.11849	2.025	0.042872	0.541	PPIL2	peptidylprolyl isomerase like 2
27288	-2.6799	17.224	1.3235	-2.0248	0.042887	0.541	RBMXL2	RBMX like 2
55603	-0.399	820.31	0.19708	-2.0245	0.042915	0.541	TENT5A	terminal nucleotidyltransferase 5A
29956	-0.14676	6210.5	0.072512	-2.0239	0.042984	0.541	CERS2	ceramide synthase 2
444	0.13384	10961	0.066141	2.0235	0.043022	0.541	ASPH	aspartate beta-hydroxylase
157777	-2.9515	13.664	1.4588	-2.0233	0.043043	0.541	MCMDC2	minichromosome maintenance domain containing 2
256691	0.23925	1982.7	0.11828	2.0228	0.043097	0.541	MAMDC2	MAM domain containing 2
4790	-0.17152	4409.7	0.084814	-2.0223	0.043146	0.541	NFKB1	nuclear factor kappa B subunit 1
10488	-0.21604	2641.8	0.10685	-2.022	0.043179	0.541	CREB3	cAMP responsive element binding protein 3
25937	0.11195	13280	0.055372	2.0218	0.043199	0.541	WWTR1	WW domain containing transcription regulator 1
728577	0.12879	9536.5	0.063712	2.0215	0.043233	0.541	CNTNAP3B	contactin associated protein family member 3B
4302	0.13445	6488.4	0.066522	2.0212	0.043261	0.541	MLLT6	"MLLT6, PHD finger containing"
165829	4.8205	8.6785	2.3851	2.0211	0.043272	0.541	GPR156	G protein-coupled receptor 156
135112	-0.1909	3254.7	0.094458	-2.021	0.043277	0.541	NCOA7	nuclear receptor coactivator 7
161725	5.4993	7.2545	2.7212	2.0209	0.043289	0.541	OTUD7A	OTU deubiquitinase 7A
439	-0.24683	2852.5	0.12214	-2.0209	0.043292	0.541	GET3	"guided entry of tail-anchored proteins factor 3, ATPase"
23230	0.19814	4005.6	0.098053	2.0208	0.043301	0.541	VPS13A	vacuolar protein sorting 13 homolog A
51657	-0.39245	794.35	0.19424	-2.0204	0.043342	0.54101	STYXL1	serine/threonine/tyrosine interacting like 1
56704	-5.4941	5.0277	2.7209	-2.0192	0.043465	0.54111	JPH1	junctophilin 1
80736	-5.6659	6.4435	2.8061	-2.0192	0.043471	0.54111	SLC44A4	solute carrier family 44 member 4
4584	-5.961	4.9922	2.9522	-2.0192	0.043472	0.54111	MUC3A	"mucin 3A, cell surface associated"
54429	-1.5038	53.258	0.74495	-2.0187	0.043523	0.54125	TAS2R5	taste 2 receptor member 5
9744	3.0786	15.64	1.5255	2.0181	0.04358	0.54144	ACAP1	"ArfGAP with coiled-coil, ankyrin repeat and PH domains 1"
27349	-0.50395	503.29	0.24998	-2.016	0.043802	0.5437	MCAT	malonyl-CoA-acyl carrier protein transacylase
345778	0.31522	993.21	0.15646	2.0147	0.043938	0.54488	MTX3	metaxin 3
1952	0.7657	147.27	0.38026	2.0136	0.044052	0.54579	CELSR2	cadherin EGF LAG seven-pass G-type receptor 2
51267	0.49669	400.98	0.24674	2.013	0.044116	0.54579	CLEC1A	C-type lectin domain family 1 member A
84518	-6.08	7.4809	3.0207	-2.0128	0.044136	0.54579	CNFN	cornifelin
115024	-0.26533	1757.5	0.13185	-2.0124	0.044175	0.54579	NT5C3B	"5'-nucleotidase, cytosolic IIIB"
6171	-0.11978	17950	0.059535	-2.0119	0.044228	0.54594	RPL41	ribosomal protein L41
22950	-0.23779	1772.9	0.11827	-2.0105	0.044378	0.54677	SLC4A1AP	solute carrier family 4 member 1 adaptor protein
51302	5.822	6.1751	2.896	2.0104	0.044391	0.54677	CYP39A1	cytochrome P450 family 39 subfamily A member 1
54768	-4.2478	8.0777	2.1135	-2.0098	0.044454	0.54677	HYDIN	HYDIN axonemal central pair apparatus protein
8479	-0.45259	559.42	0.2252	-2.0097	0.044459	0.54677	HIRIP3	HIRA interacting protein 3
27443	-0.39862	711.86	0.19845	-2.0087	0.044572	0.54765	CECR2	CECR2 histone acetyl-lysine reader
9111	-0.31778	1040.6	0.15842	-2.0059	0.044868	0.55063	NMI	N-myc and STAT interactor
9284	0.22094	2041.4	0.11016	2.0056	0.044896	0.55063	NPIPA1	nuclear pore complex interacting protein family member A1
3300	-0.20027	2868.5	0.099882	-2.0051	0.044953	0.55082	DNAJB2	DnaJ heat shock protein family (Hsp40) member B2
7480	4.2445	8.313	2.1182	2.0038	0.045089	0.55136	WNT10B	Wnt family member 10B
51329	-0.21761	3524.5	0.10863	-2.0032	0.045157	0.55136	ARL6IP4	ADP ribosylation factor like GTPase 6 interacting protein 4
25814	-0.28526	2422.9	0.14244	-2.0027	0.045214	0.55136	ATXN10	ataxin 10
54863	-0.19859	5709.2	0.09918	-2.0023	0.045249	0.55136	TOR4A	torsin family 4 member A
2744	0.17118	7179.1	0.085497	2.0022	0.045268	0.55136	GLS	glutaminase
10327	-0.2447	1998.7	0.12228	-2.0011	0.045382	0.55136	AKR1A1	aldo-keto reductase family 1 member A1
23484	-0.3025	1627.5	0.15117	-2.001	0.045388	0.55136	LEPROTL1	leptin receptor overlapping transcript like 1
148156	0.66079	207.55	0.33024	2.0009	0.0454	0.55136	ZNF558	zinc finger protein 558
55131	0.22015	2057.9	0.11003	2.0009	0.045401	0.55136	RBM28	RNA binding motif protein 28
57693	-0.23747	1892.5	0.11869	-2.0008	0.04541	0.55136	ZNF317	zinc finger protein 317
2074	0.23468	1790.5	0.11735	1.9999	0.04551	0.55184	ERCC6	"ERCC excision repair 6, chromatin remodeling factor"
221301	-6.2174	4.4072	3.1091	-1.9997	0.045532	0.55184	CALHM4	calcium homeostasis modulator family member 4
26137	0.5157	781.4	0.25811	1.998	0.04572	0.55354	ZBTB20	zinc finger and BTB domain containing 20
84734	-0.49524	405.13	0.24793	-1.9975	0.045772	0.55354	FAM167B	family with sequence similarity 167 member B
51162	0.13481	13475	0.067506	1.997	0.045821	0.55354	EGFL7	EGF like domain multiple 7
85464	0.15157	4896.4	0.075902	1.9969	0.045839	0.55354	SSH2	slingshot protein phosphatase 2
114793	0.11479	8933.7	0.057514	1.9958	0.045956	0.55446	FMNL2	formin like 2
60412	-0.19412	2433.7	0.097302	-1.995	0.046045	0.55489	EXOC4	exocyst complex component 4
6385	0.25176	2730.9	0.12622	1.9947	0.046075	0.55489	SDC4	syndecan 4
4067	-0.24106	1698	0.12092	-1.9935	0.046207	0.55598	LYN	"LYN proto-oncogene, Src family tyrosine kinase"
161582	-0.76444	168.52	0.38364	-1.9926	0.046305	0.55659	DNAAF4	dynein axonemal assembly factor 4
9056	0.22098	1906.5	0.11093	1.9921	0.046363	0.55659	SLC7A7	solute carrier family 7 member 7
730098	1.8408	35.587	0.92414	1.9919	0.046383	0.55659	LOC730098	uncharacterized LOC730098
6368	-3.0394	17.821	1.5263	-1.9914	0.046437	0.55674	CCL23	C-C motif chemokine ligand 23
22990	-0.20546	2776.2	0.10321	-1.9907	0.04651	0.55712	PCNX1	pecanex 1
3710	0.1364	11409	0.068558	1.9896	0.046638	0.55815	ITPR3	"inositol 1,4,5-trisphosphate receptor type 3"
378708	-0.61281	215.72	0.30813	-1.9888	0.046719	0.55862	CENPS	centromere protein S
81035	0.18629	3124.7	0.093689	1.9884	0.046772	0.55875	COLEC12	collectin subfamily member 12
64780	0.20569	2942.7	0.10355	1.9864	0.04699	0.56011	MICAL1	"microtubule associated monooxygenase, calponin and LIM domain containing 1"
64778	0.10681	18438	0.053804	1.9852	0.047121	0.56011	FNDC3B	fibronectin type III domain containing 3B
92312	0.34611	800.28	0.17436	1.985	0.047141	0.56011	MEX3A	mex-3 RNA binding family member A
7942	-0.57714	299.8	0.29075	-1.985	0.047144	0.56011	TFEB	transcription factor EB
10161	0.42318	514.61	0.21328	1.9841	0.047244	0.56011	LPAR6	lysophosphatidic acid receptor 6
169611	-5.7385	5.2132	2.893	-1.9836	0.0473	0.56011	OLFML2A	olfactomedin like 2A
2878	-0.33349	1080.2	0.16813	-1.9835	0.047314	0.56011	GPX3	glutathione peroxidase 3
317	0.24127	1826.9	0.12165	1.9832	0.047343	0.56011	APAF1	apoptotic peptidase activating factor 1
26145	-0.27959	1369.1	0.14105	-1.9822	0.047461	0.56011	IRF2BP1	interferon regulatory factor 2 binding protein 1
27164	-1.0137	100.98	0.51143	-1.982	0.047479	0.56011	SALL3	spalt like transcription factor 3
64859	0.20893	2480.7	0.10543	1.9817	0.047518	0.56011	NABP1	nucleic acid binding protein 1
10113	0.26527	1308	0.13389	1.9813	0.04756	0.56011	PREB	prolactin regulatory element binding
65992	-0.19956	3591.9	0.10073	-1.9812	0.047569	0.56011	DDRGK1	DDRGK domain containing 1
23143	0.25233	1568.1	0.12737	1.9812	0.047572	0.56011	LRCH1	leucine rich repeats and calponin homology domain containing 1
11322	0.27773	1271.3	0.1402	1.981	0.047595	0.56011	TMC6	transmembrane channel like 6
55328	0.89546	106.61	0.45206	1.9809	0.047607	0.56011	RNLS	"renalase, FAD dependent amine oxidase"
7111	-0.99571	114.56	0.50268	-1.9808	0.047614	0.56011	TMOD1	tropomodulin 1
55281	-0.17552	5271.6	0.088631	-1.9803	0.047669	0.56011	TMEM140	transmembrane protein 140
84696	-6.09	3.9947	3.0758	-1.98	0.047706	0.56011	ABHD1	abhydrolase domain containing 1
389799	6.5021	5.3836	3.2842	1.9798	0.047724	0.56011	CFAP77	cilia and flagella associated protein 77
4586	6.1573	4.3839	3.1117	1.9788	0.047841	0.56099	MUC5AC	"mucin 5AC, oligomeric mucus/gel-forming"
51090	-0.58141	289.51	0.29395	-1.9779	0.047937	0.56114	PLLP	plasmolipin
56834	-0.25971	1572.3	0.1313	-1.9779	0.047938	0.56114	GPR137	G protein-coupled receptor 137
1366	0.27983	1356.2	0.14153	1.9773	0.04801	0.56127	CLDN7	claudin 7
79939	-0.17262	3675.1	0.08731	-1.9771	0.048033	0.56127	SLC35E1	solute carrier family 35 member E1
11183	0.18239	3770.5	0.092285	1.9764	0.048107	0.56164	MAP4K5	mitogen-activated protein kinase kinase kinase kinase 5
91147	0.40745	516.53	0.20622	1.9759	0.048171	0.5619	TMEM67	transmembrane protein 67
1454	0.14084	9920	0.071313	1.975	0.048267	0.56252	CSNK1E	casein kinase 1 epsilon
28982	0.52322	434.74	0.26526	1.9725	0.048551	0.56534	FLVCR1	FLVCR heme transporter 1
10541	-0.15025	4366.1	0.076226	-1.9712	0.048706	0.56665	ANP32B	acidic nuclear phosphoprotein 32 family member B
3913	0.10801	21491	0.054817	1.9703	0.048804	0.5673	LAMB2	laminin subunit beta 2
2566	5.9751	7.1975	3.0341	1.9693	0.04892	0.5673	GABRG2	gamma-aminobutyric acid type A receptor subunit gamma2
10794	-0.33545	888.41	0.17037	-1.969	0.048958	0.5673	ZNF460	zinc finger protein 460
55000	0.12874	9037.5	0.065387	1.9689	0.048959	0.5673	TUG1	taurine up-regulated 1
8787	1.0465	110.6	0.53153	1.9688	0.048974	0.5673	RGS9	regulator of G protein signaling 9
1859	-0.18492	2764.5	0.093979	-1.9677	0.049102	0.56794	DYRK1A	dual specificity tyrosine phosphorylation regulated kinase 1A
23241	0.13925	6429.1	0.07077	1.9676	0.049114	0.56794	PACS2	phosphofurin acidic cluster sorting protein 2
8601	-0.49662	349.61	0.25249	-1.9669	0.049196	0.56839	RGS20	regulator of G protein signaling 20
23534	-0.16837	3610.8	0.085623	-1.9664	0.049251	0.56854	TNPO3	transportin 3
1675	-1.2409	56.445	0.63162	-1.9646	0.049459	0.56905	CFD	complement factor D
22826	-0.16384	3709.4	0.083405	-1.9643	0.04949	0.56905	DNAJC8	DnaJ heat shock protein family (Hsp40) member C8
159686	0.87803	136.06	0.44701	1.9643	0.049501	0.56905	CFAP58	cilia and flagella associated protein 58
10344	5.8613	4.6352	2.9845	1.9639	0.049537	0.56905	CCL26	C-C motif chemokine ligand 26
23464	-0.65622	353.62	0.3342	-1.9636	0.049581	0.56905	GCAT	glycine C-acetyltransferase
631	-0.8103	144.18	0.41268	-1.9635	0.049588	0.56905	BFSP1	beaded filament structural protein 1
6494	-0.18205	3014.8	0.09272	-1.9635	0.049594	0.56905	SIPA1	signal-induced proliferation-associated 1
10376	-0.09371	17059	0.04774	-1.9629	0.049653	0.56924	TUBA1B	tubulin alpha 1b
9904	-0.26496	1755.8	0.13503	-1.9622	0.049743	0.56978	RBM19	RNA binding motif protein 19
100527943	-5.2714	8.9871	2.6897	-1.9598	0.050017	0.57092	TGIF2-RAB5IF	TGIF2-RAB5IF readthrough
8697	0.28273	1364.3	0.14431	1.9591	0.050098	0.57092	CDC23	cell division cycle 23
8934	0.19074	3332.5	0.097393	1.9585	0.050172	0.57092	RAB29	"RAB29, member RAS oncogene family"
9747	0.18105	2834.1	0.09245	1.9584	0.050183	0.57092	TCAF1	TRPM8 channel associated factor 1
25800	-0.29745	1089.2	0.15188	-1.9584	0.050184	0.57092	SLC39A6	solute carrier family 39 member 6
126017	-0.63342	268.92	0.3235	-1.958	0.050229	0.57092	ZNF813	zinc finger protein 813
51566	0.1432	5113.1	0.073147	1.9577	0.050267	0.57092	ARMCX3	armadillo repeat containing X-linked 3
57720	0.134	7166.3	0.068455	1.9575	0.050287	0.57092	GPR107	G protein-coupled receptor 107
9961	-0.12171	20490	0.062176	-1.9575	0.050294	0.57092	MVP	major vault protein
10965	-0.45009	503.9	0.22997	-1.9572	0.050324	0.57092	ACOT2	acyl-CoA thioesterase 2
220441	0.29991	1215	0.15325	1.9571	0.05034	0.57092	RNF152	ring finger protein 152
147807	-0.42893	699.35	0.21918	-1.9569	0.050356	0.57092	ZNF524	zinc finger protein 524
92170	0.23811	1849.2	0.12174	1.956	0.050468	0.57171	MTG1	mitochondrial ribosome associated GTPase 1
79001	-0.21792	3468.1	0.1115	-1.9544	0.050658	0.57323	VKORC1	vitamin K epoxide reductase complex subunit 1
25994	-0.18293	2916.4	0.093621	-1.9539	0.05071	0.57323	HIGD1A	HIG1 hypoxia inducible domain family member 1A
3619	0.38012	678.47	0.19456	1.9537	0.050731	0.57323	INCENP	inner centromere protein
100289678	0.39176	824.67	0.20057	1.9532	0.050791	0.57343	ZNF783	zinc finger family member 783
1490	0.075965	65241	0.038912	1.9523	0.050908	0.57427	CCN2	cellular communication network factor 2
9569	0.26716	1599.3	0.13689	1.9516	0.050982	0.57462	GTF2IRD1	GTF2I repeat domain containing 1
8940	0.25043	2109.3	0.12835	1.9512	0.051037	0.57474	TOP3B	DNA topoisomerase III beta
5325	0.26423	1845.5	0.13549	1.9502	0.051156	0.57561	PLAGL1	PLAG1 like zinc finger 1
51019	-0.44117	561.11	0.22634	-1.9491	0.05128	0.57581	WASHC3	WASH complex subunit 3
2799	0.088331	21961	0.045334	1.9484	0.051362	0.57581	GNS	glucosamine (N-acetyl)-6-sulfatase
2052	-0.20221	2661.6	0.10378	-1.9484	0.051364	0.57581	EPHX1	epoxide hydrolase 1
5217	0.1753	3645	0.089981	1.9482	0.051386	0.57581	PFN2	profilin 2
9200	-0.6335	342.74	0.32517	-1.9482	0.05139	0.57581	HACD1	3-hydroxyacyl-CoA dehydratase 1
5272	0.16066	3944	0.082496	1.9474	0.051481	0.57608	SERPINB9	serpin family B member 9
84448	-3.1316	10.669	1.6082	-1.9473	0.051501	0.57608	ABLIM2	actin binding LIM protein family member 2
6507	-5.8191	4.5234	2.9898	-1.9463	0.051618	0.57662	SLC1A3	solute carrier family 1 member 3
124923	-0.40863	637.07	0.20999	-1.9459	0.051661	0.57662	RSKR	ribosomal protein S6 kinase related
54870	0.16673	3393.5	0.085685	1.9458	0.051678	0.57662	QRICH1	glutamine rich 1
10578	6.0864	5.8875	3.1307	1.9441	0.051881	0.5779	GNLY	granulysin
9283	3.4027	9.2569	1.7503	1.9441	0.051882	0.5779	GPR37L1	G protein-coupled receptor 37 like 1
10897	-0.22956	2604.8	0.1181	-1.9438	0.051923	0.5779	YIF1A	"Yip1 interacting factor homolog A, membrane trafficking protein"
57161	-0.51364	601.42	0.26432	-1.9433	0.051985	0.57811	PELI2	pellino E3 ubiquitin protein ligase family member 2
2664	0.13957	6025.2	0.071891	1.9414	0.052214	0.58017	GDI1	GDP dissociation inhibitor 1
285971	-0.42933	525.84	0.22122	-1.9408	0.052286	0.58049	ZNF775	zinc finger protein 775
2034	0.092196	31704	0.047517	1.9403	0.052349	0.58071	EPAS1	endothelial PAS domain protein 1
79716	0.23332	1788.6	0.12028	1.9398	0.0524	0.58079	NPEPL1	aminopeptidase like 1
9467	-0.11586	8951.1	0.059786	-1.938	0.052627	0.58274	SH3BP5	SH3 domain binding protein 5
80000	-5.1456	7.5008	2.6555	-1.9377	0.052663	0.58274	GREB1L	GREB1 like retinoic acid receptor coactivator
124944	0.69258	433.8	0.35753	1.9371	0.052732	0.5828	C17orf49	chromosome 17 open reading frame 49
56052	-0.30346	1345.4	0.15667	-1.9369	0.052755	0.5828	ALG1	ALG1 chitobiosyldiphosphodolichol beta-mannosyltransferase
2593	-0.3262	826	0.16847	-1.9362	0.052841	0.58326	GAMT	guanidinoacetate N-methyltransferase
283358	4.9462	8.7181	2.5571	1.9343	0.053077	0.58501	B4GALNT3	"beta-1,4-N-acetyl-galactosaminyltransferase 3"
55657	0.27812	1211.5	0.14379	1.9342	0.053088	0.58501	ZNF692	zinc finger protein 692
6334	0.40354	715.4	0.20897	1.9311	0.053475	0.58784	SCN8A	sodium voltage-gated channel alpha subunit 8
9742	0.26816	1362.3	0.13888	1.9309	0.053499	0.58784	IFT140	intraflagellar transport 140
9903	-0.13201	8449.9	0.068378	-1.9307	0.053524	0.58784	KLHL21	kelch like family member 21
10274	-0.24168	1742	0.12523	-1.9299	0.053617	0.58784	STAG1	stromal antigen 1
894	0.18585	6201.2	0.096341	1.9291	0.053718	0.58784	CCND2	cyclin D2
25778	0.26931	1518.3	0.13963	1.9287	0.053767	0.58784	DSTYK	dual serine/threonine and tyrosine protein kinase
23456	0.29135	955.16	0.15106	1.9287	0.053769	0.58784	ABCB10	ATP binding cassette subfamily B member 10
9817	-0.19008	3646.8	0.098569	-1.9284	0.053801	0.58784	KEAP1	kelch like ECH associated protein 1
2029	-0.16591	3575.8	0.086048	-1.9282	0.053835	0.58784	ENSA	endosulfine alpha
276	5.4166	4.1539	2.8094	1.928	0.053856	0.58784	AMY1A	amylase alpha 1A
278	5.4166	4.1539	2.8094	1.928	0.053856	0.58784	AMY1C	amylase alpha 1C
9144	-0.18686	3874.7	0.096925	-1.9279	0.053872	0.58784	SYNGR2	synaptogyrin 2
23370	-0.22147	2105.8	0.11495	-1.9266	0.054029	0.58907	ARHGEF18	Rho/Rac guanine nucleotide exchange factor 18
8853	0.13915	6857.1	0.072246	1.926	0.054101	0.58938	ASAP2	"ArfGAP with SH3 domain, ankyrin repeat and PH domain 2"
728489	-0.78646	161.58	0.40855	-1.925	0.054227	0.59027	DNLZ	DNL-type zinc finger
26207	-0.61191	323.94	0.31808	-1.9238	0.05438	0.59145	PITPNC1	phosphatidylinositol transfer protein cytoplasmic 1
388610	-0.23497	2321.3	0.1222	-1.9228	0.054509	0.59199	TRNP1	TMF1 regulated nuclear protein 1
80700	-0.16548	4349.6	0.086068	-1.9227	0.054518	0.59199	UBXN6	UBX domain protein 6
11344	-0.20653	3440.4	0.10748	-1.9215	0.054673	0.59302	TWF2	twinfilin actin binding protein 2
8517	0.2525	1551.9	0.13143	1.9212	0.054702	0.59302	IKBKG	inhibitor of nuclear factor kappa B kinase regulatory subunit gamma
5244	1.8408	30.13	0.95833	1.9209	0.054748	0.59304	ABCB4	ATP binding cassette subfamily B member 4
7423	-0.1863	2713.5	0.097008	-1.9205	0.054794	0.59306	VEGFB	vascular endothelial growth factor B
56257	-0.22324	3231.9	0.11629	-1.9197	0.054901	0.59343	MEPCE	methylphosphate capping enzyme
5826	0.2144	3098	0.11169	1.9195	0.054918	0.59343	ABCD4	ATP binding cassette subfamily D member 4
25902	-0.19511	2960.6	0.10168	-1.9188	0.055004	0.59365	MTHFD1L	methylenetetrahydrofolate dehydrogenase (NADP+ dependent) 1 like
85007	0.23557	1865.2	0.12278	1.9187	0.055027	0.59365	PHYKPL	5-phosphohydroxy-L-lysine phospho-lyase
51596	-0.19422	2271.9	0.10132	-1.9169	0.055253	0.59434	CUTA	cutA divalent cation tolerance homolog
427	0.27431	1820.4	0.14313	1.9166	0.055288	0.59434	ASAH1	N-acylsphingosine amidohydrolase 1
5431	0.13114	6751.8	0.068422	1.9166	0.055288	0.59434	POLR2B	RNA polymerase II subunit B
221143	-0.63302	201.12	0.33032	-1.9164	0.055315	0.59434	EEF1AKMT1	EEF1A lysine methyltransferase 1
5688	-0.14223	6387.1	0.074252	-1.9155	0.055426	0.59434	PSMA7	proteasome 20S subunit alpha 7
463	-0.19427	3900.7	0.10142	-1.9155	0.055434	0.59434	ZFHX3	zinc finger homeobox 3
109703458	-1.1037	133.75	0.57636	-1.915	0.055495	0.59434	HTD2	hydroxyacyl-thioester dehydratase type 2
116843	0.41739	637.56	0.21798	1.9149	0.055512	0.59434	SLC18B1	solute carrier family 18 member B1
8341	-1.8358	28.672	0.95878	-1.9148	0.055523	0.59434	H2BC15	H2B clustered histone 15
79718	0.17055	4126.8	0.089082	1.9145	0.055556	0.59434	TBL1XR1	TBL1X receptor 1
89848	0.21573	2691.6	0.11269	1.9143	0.05558	0.59434	FCHSD1	FCH and double SH3 domains 1
84946	0.3018	1048.4	0.15777	1.913	0.055749	0.59567	LTV1	LTV1 ribosome biogenesis factor
10060	5.723	4.6206	2.9925	1.9124	0.055819	0.59594	ABCC9	ATP binding cassette subfamily C member 9
100303755	0.89988	128.22	0.47063	1.9121	0.055869	0.59595	PET117	PET117 cytochrome c oxidase chaperone
78992	-0.25287	1520.5	0.1323	-1.9113	0.055961	0.59595	YIPF2	Yip1 domain family member 2
83933	0.32296	1128.1	0.16898	1.9112	0.055981	0.59595	HDAC10	histone deacetylase 10
11188	0.12942	10145	0.06772	1.911	0.055999	0.59595	NISCH	nischarin
400668	5.9919	5.7642	3.1377	1.9097	0.056177	0.59711	PRSS57	serine protease 57
283807	-3.2096	10.258	1.6809	-1.9095	0.056197	0.59711	FBXL22	F-box and leucine rich repeat protein 22
26268	0.28355	1482.5	0.14855	1.9088	0.056283	0.59755	FBXO9	F-box protein 9
83552	6.5432	29.468	3.4293	1.908	0.056387	0.59817	MFRP	membrane frizzled-related protein
112616	-0.22975	1826.8	0.12048	-1.9069	0.056534	0.59863	CMTM7	CKLF like MARVEL transmembrane domain containing 7
84957	0.31306	1149	0.16419	1.9067	0.056561	0.59863	RELT	RELT TNF receptor
152503	0.15456	6235	0.081065	1.9067	0.056564	0.59863	SH3D19	SH3 domain containing 19
8481	0.28899	1012.8	0.15163	1.9059	0.056668	0.59903	OFD1	OFD1 centriole and centriolar satellite protein
26035	0.12614	7964.7	0.066192	1.9057	0.056691	0.59903	GLCE	glucuronic acid epimerase
5305	0.28042	1372.3	0.14721	1.9049	0.056796	0.59925	PIP4K2A	phosphatidylinositol-5-phosphate 4-kinase type 2 alpha
29057	0.41407	607.92	0.21738	1.9048	0.056802	0.59925	FAM156A	family with sequence similarity 156 member A
5691	-0.21035	2610.8	0.11049	-1.9038	0.056937	0.59946	PSMB3	proteasome 20S subunit beta 3
728841	0.22265	1989.2	0.11697	1.9034	0.056991	0.59946	NBPF8	NBPF member 8
710	-5.9356	4.7151	3.1186	-1.9033	0.056999	0.59946	SERPING1	serpin family G member 1
83752	0.19442	3090.9	0.10215	1.9033	0.057002	0.59946	LONP2	"lon peptidase 2, peroxisomal"
50804	0.19001	3803.1	0.099867	1.9026	0.057096	0.59981	MYEF2	myelin expression factor 2
9590	0.093943	68360	0.049382	1.9024	0.057125	0.59981	AKAP12	A-kinase anchoring protein 12
51278	-0.2423	2603.9	0.12742	-1.9016	0.05722	0.6002	IER5	immediate early response 5
56999	0.26129	1430.8	0.13746	1.9009	0.057316	0.6002	ADAMTS9	ADAM metallopeptidase with thrombospondin type 1 motif 9
25873	-0.17394	9355.8	0.091503	-1.9009	0.057316	0.6002	RPL36	ribosomal protein L36
81693	5.3292	6.3597	2.8068	1.8987	0.057608	0.6002	AMN	amnion associated transmembrane protein
10971	-0.11508	10700	0.060615	-1.8986	0.057623	0.6002	YWHAQ	tyrosine 3-monooxygenase/tryptophan 5-monooxygenase activation protein theta
6461	-0.23037	2714.3	0.12135	-1.8985	0.05763	0.6002	SHB	SH2 domain containing adaptor protein B
79137	-0.1543	3737.9	0.08128	-1.8983	0.057655	0.6002	RETREG2	reticulophagy regulator family member 2
22846	0.15986	8425.3	0.084213	1.8982	0.057666	0.6002	VASH1	vasohibin 1
4363	0.11824	10805	0.062292	1.8982	0.057669	0.6002	ABCC1	ATP binding cassette subfamily C member 1
375593	0.71986	163.13	0.37924	1.8981	0.057676	0.6002	TRIM73	tripartite motif containing 73
282679	-2.9501	19.501	1.5547	-1.8975	0.057759	0.6002	AQP11	aquaporin 11
57544	0.5356	361.47	0.2823	1.8973	0.057789	0.6002	TXNDC16	thioredoxin domain containing 16
1329	-0.19018	2762.3	0.10025	-1.8971	0.057817	0.6002	COX5B	cytochrome c oxidase subunit 5B
116151	-0.14612	4814.7	0.07703	-1.8969	0.057844	0.6002	FAM210B	family with sequence similarity 210 member B
3169	3.7412	9.8867	1.9725	1.8967	0.057865	0.6002	FOXA1	forkhead box A1
9766	0.15526	4881.9	0.081881	1.8962	0.057932	0.6002	SUSD6	sushi domain containing 6
54986	-0.78029	153.57	0.41152	-1.8961	0.057948	0.6002	ULK4	unc-51 like kinase 4
56666	-0.32637	1019	0.17214	-1.8959	0.057973	0.6002	PANX2	pannexin 2
8202	0.14307	4562.5	0.075479	1.8955	0.058032	0.6002	NCOA3	nuclear receptor coactivator 3
60314	-0.63242	314.1	0.33376	-1.8948	0.058117	0.6002	C12orf10	chromosome 12 open reading frame 10
84875	-0.18081	4703.1	0.095443	-1.8944	0.058169	0.6002	PARP10	poly(ADP-ribose) polymerase family member 10
168620	-2.8895	17.356	1.5256	-1.894	0.058225	0.6002	BHLHA15	basic helix-loop-helix family member a15
51501	-0.35395	902.39	0.18689	-1.8939	0.058239	0.6002	HIKESHI	heat shock protein nuclear import factor hikeshi
10351	0.27222	1170.5	0.14376	1.8936	0.058282	0.6002	ABCA8	ATP binding cassette subfamily A member 8
4052	0.18207	3293.3	0.096153	1.8935	0.058285	0.6002	LTBP1	latent transforming growth factor beta binding protein 1
56098	-1.512	62.003	0.79926	-1.8918	0.058517	0.60212	PCDHGC4	"protocadherin gamma subfamily C, 4"
27044	-0.13455	10649	0.071189	-1.89	0.058757	0.60344	SND1	staphylococcal nuclease and tudor domain containing 1
1289	0.10957	14497	0.057979	1.8898	0.058781	0.60344	COL5A1	collagen type V alpha 1 chain
11274	-0.23652	1469.3	0.12519	-1.8893	0.058857	0.60344	USP18	ubiquitin specific peptidase 18
55283	-5.7877	4.797	3.0641	-1.8889	0.058906	0.60344	MCOLN3	mucolipin 3
25803	5.5783	5.3776	2.9538	1.8885	0.058959	0.60344	SPDEF	SAM pointed domain containing ETS transcription factor
10106	-0.13152	6474.5	0.069663	-1.888	0.059023	0.60344	CTDSP2	CTD small phosphatase 2
64921	0.40075	575.57	0.21235	1.8872	0.059128	0.60344	CASD1	CAS1 domain containing 1
995	-5.3873	6.0894	2.8547	-1.8872	0.059138	0.60344	CDC25C	cell division cycle 25C
101930100	5.5783	5.6223	2.9559	1.8871	0.059142	0.60344	LOC101930100	uncharacterized LOC101930100
55756	-0.34265	763.85	0.18164	-1.8865	0.059234	0.60344	INTS9	integrator complex subunit 9
22885	0.12021	8079.4	0.063721	1.8864	0.059235	0.60344	ABLIM3	actin binding LIM protein family member 3
65003	-0.3971	748.49	0.21052	-1.8862	0.059262	0.60344	MRPL11	mitochondrial ribosomal protein L11
10426	0.40022	730.85	0.21221	1.886	0.059296	0.60344	TUBGCP3	tubulin gamma complex associated protein 3
64208	0.82049	142.59	0.43507	1.8859	0.059314	0.60344	POPDC3	popeye domain containing 3
51742	0.17448	3288.3	0.092524	1.8858	0.059323	0.60344	ARID4B	AT-rich interaction domain 4B
2969	0.14194	5960.3	0.075284	1.8854	0.059378	0.60354	GTF2I	general transcription factor IIi
9638	-0.1857	2600.1	0.098567	-1.884	0.059562	0.60426	FEZ1	fasciculation and elongation protein zeta 1
10140	0.26384	1235.7	0.14016	1.8825	0.059773	0.60426	TOB1	"transducer of ERBB2, 1"
157695	0.49591	409.82	0.26344	1.8825	0.059775	0.60426	TDRP	testis development related protein
84299	-0.35685	927.02	0.18957	-1.8824	0.059788	0.60426	MIEN1	migration and invasion enhancer 1
8747	1.2414	57.661	0.65953	1.8823	0.059794	0.60426	ADAM21	ADAM metallopeptidase domain 21
200350	-3.1154	12.016	1.6557	-1.8817	0.059883	0.60426	FOXD4L1	forkhead box D4 like 1
81567	0.073862	53823	0.03926	1.8814	0.059924	0.60426	TXNDC5	thioredoxin domain containing 5
55669	0.22536	1724.4	0.11981	1.8811	0.059962	0.60426	MFN1	mitofusin 1
5694	-0.20604	2341.8	0.10953	-1.8811	0.059965	0.60426	PSMB6	proteasome 20S subunit beta 6
506	-0.11118	13357	0.059103	-1.881	0.059967	0.60426	ATP5F1B	ATP synthase F1 subunit beta
57109	-0.27122	1467.2	0.1442	-1.8808	0.059999	0.60426	REXO4	"REX4 homolog, 3'-5' exonuclease"
9657	0.3322	909.28	0.17665	1.8806	0.060029	0.60426	IQCB1	IQ motif containing B1
80243	0.21363	2257.4	0.1136	1.8805	0.060037	0.60426	PREX2	"phosphatidylinositol-3,4,5-trisphosphate dependent Rac exchange factor 2"
6723	-0.23699	1953.6	0.12609	-1.8795	0.060171	0.60515	SRM	spermidine synthase
51319	0.44383	424.52	0.23632	1.8781	0.060365	0.60665	RSRC1	arginine and serine rich coiled-coil 1
6182	-0.2699	1399.1	0.14377	-1.8774	0.060469	0.60723	MRPL12	mitochondrial ribosomal protein L12
55071	-0.64252	269.24	0.34235	-1.8768	0.060546	0.60751	C9orf40	chromosome 9 open reading frame 40
100130958	0.92786	103.85	0.49447	1.8765	0.060587	0.60751	SYCE1L	synaptonemal complex central element protein 1 like
9915	-4.6451	5.173	2.4778	-1.8747	0.060838	0.60957	ARNT2	aryl hydrocarbon receptor nuclear translocator 2
83986	-0.14136	5706.9	0.075441	-1.8738	0.060963	0.61036	FAM234A	family with sequence similarity 234 member A
57573	0.38188	642.11	0.20394	1.8725	0.061131	0.61151	ZNF471	zinc finger protein 471
134637	0.48866	452.1	0.261	1.8723	0.06117	0.61151	ADAT2	adenosine deaminase tRNA specific 2
220134	-3.8449	7.133	2.0545	-1.8715	0.061277	0.61193	SKA1	spindle and kinetochore associated complex subunit 1
130074	0.17715	5389.6	0.094684	1.871	0.061347	0.61193	FAM168B	family with sequence similarity 168 member B
11100	0.12683	8415	0.067787	1.871	0.061349	0.61193	HNRNPUL1	heterogeneous nuclear ribonucleoprotein U like 1
79230	0.46772	402.17	0.25015	1.8698	0.061518	0.61316	ZNF557	zinc finger protein 557
9079	0.17723	2748.6	0.094821	1.8691	0.06161	0.61343	LDB2	LIM domain binding 2
55568	0.15342	5529.5	0.082091	1.8689	0.061637	0.61343	GALNT10	polypeptide N-acetylgalactosaminyltransferase 10
124751	0.29752	864.92	0.15927	1.868	0.061767	0.61421	KRBA2	KRAB-A domain containing 2
221060	1.0865	68.02	0.58176	1.8677	0.061807	0.61421	RPP38-DT	RPP38 divergent transcript
22978	-0.16923	3427.7	0.090639	-1.8671	0.061893	0.61452	NT5C2	"5'-nucleotidase, cytosolic II"
11047	-0.15554	5175	0.083318	-1.8668	0.06193	0.61452	ADRM1	adhesion regulating molecule 1
51614	-0.14457	6033.8	0.077511	-1.8652	0.06216	0.61634	ERGIC3	ERGIC and golgi 3
7288	-5.2037	6.6857	2.7942	-1.8623	0.062555	0.61968	TULP2	TUB like protein 2
5307	5.5784	6.9976	2.9962	1.8618	0.062629	0.61968	PITX1	paired like homeodomain 1
221184	-0.21003	2468.4	0.11281	-1.8618	0.062636	0.61968	CPNE2	copine 2
84992	-0.29554	1985.9	0.15881	-1.861	0.062749	0.62008	PIGY	phosphatidylinositol glycan anchor biosynthesis class Y
22827	-0.18717	4119.4	0.10058	-1.8608	0.062769	0.62008	PUF60	poly(U) binding splicing factor 60
23549	-0.20657	1947.9	0.1111	-1.8593	0.062982	0.62148	DNPEP	aspartyl aminopeptidase
51119	-0.16019	3744.5	0.086204	-1.8582	0.063136	0.62148	SBDS	SBDS ribosome maturation factor
10346	0.11123	10034	0.059862	1.8582	0.063145	0.62148	TRIM22	tripartite motif containing 22
90557	0.77856	231.3	0.419	1.8581	0.063149	0.62148	CCDC74A	coiled-coil domain containing 74A
84191	-0.32241	983.09	0.17352	-1.8581	0.063156	0.62148	CIAO2A	cytosolic iron-sulfur assembly component 2A
9997	-0.53999	575.5	0.29065	-1.8579	0.06319	0.62148	SCO2	synthesis of cytochrome C oxidase 2
6668	-0.36741	688.48	0.19781	-1.8573	0.063262	0.62158	SP2	Sp2 transcription factor
112	0.17154	4561.8	0.092367	1.8571	0.063294	0.62158	ADCY6	adenylate cyclase 6
25832	0.29477	1368.6	0.15877	1.8566	0.063362	0.6218	NBPF14	NBPF member 14
329	0.18568	3552.3	0.10008	1.8553	0.063557	0.6231	BIRC2	baculoviral IAP repeat containing 2
80169	0.21903	2209.6	0.11813	1.8542	0.063718	0.6231	CTC1	CST telomere replication complex component 1
113829	-0.20082	2357.8	0.10831	-1.8541	0.063725	0.6231	SLC35A4	solute carrier family 35 member A4
283899	0.19612	2609.2	0.10579	1.8539	0.063752	0.6231	INO80E	INO80 complex subunit E
283455	0.47237	491.45	0.2548	1.8539	0.063755	0.6231	KSR2	kinase suppressor of ras 2
115939	-0.20423	2183.2	0.11018	-1.8536	0.0638	0.6231	TSR3	TSR3 ribosome maturation factor
642852	0.21604	1878.2	0.11656	1.8534	0.063821	0.6231	LINC00205	long intergenic non-protein coding RNA 205
84769	-0.50132	386.19	0.27066	-1.8522	0.063996	0.62435	MPV17L2	MPV17 mitochondrial inner membrane protein like 2
10777	-5.8308	3.6957	3.1513	-1.8503	0.064273	0.62627	ARPP21	cAMP regulated phosphoprotein 21
80235	0.45563	482.03	0.24626	1.8502	0.064287	0.62627	PIGZ	phosphatidylinositol glycan anchor biosynthesis class Z
3006	-0.97444	98.507	0.52678	-1.8498	0.064341	0.62634	H1-2	"H1.2 linker histone, cluster member"
5829	0.10024	22472	0.054218	1.8488	0.064488	0.62674	PXN	paxillin
140890	0.15214	4785.5	0.082297	1.8487	0.0645	0.62674	SREK1	splicing regulatory glutamic acid and lysine rich protein 1
701	2.2908	22.735	1.2392	1.8485	0.064523	0.62674	BUB1B	BUB1 mitotic checkpoint serine/threonine kinase B
4486	0.88777	96.52	0.48039	1.848	0.064596	0.62694	MST1R	macrophage stimulating 1 receptor
131474	-0.53284	248.19	0.28841	-1.8475	0.064679	0.62694	CHCHD4	coiled-coil-helix-coiled-coil-helix domain containing 4
8667	-0.14043	5147	0.076015	-1.8474	0.064685	0.62694	EIF3H	eukaryotic translation initiation factor 3 subunit H
374987	1.6164	39.274	0.87508	1.8471	0.064731	0.62694	NEXN-AS1	NEXN antisense RNA 1
104	0.20971	2041.7	0.11368	1.8447	0.065082	0.62988	ADARB1	adenosine deaminase RNA specific B1
7439	0.62814	290.16	0.34104	1.8419	0.065496	0.63335	BEST1	bestrophin 1
10988	-0.16903	2971.7	0.091786	-1.8416	0.065536	0.63335	METAP2	methionyl aminopeptidase 2
727866	0.39577	595.64	0.21498	1.8409	0.065634	0.63385	FAM156B	family with sequence similarity 156 member B
11311	0.2701	1085.2	0.1468	1.8399	0.06578	0.63407	VPS45	vacuolar protein sorting 45 homolog
9746	0.22395	2477	0.12184	1.8381	0.066044	0.63407	CLSTN3	calsyntenin 3
6536	-0.47931	373.98	0.26077	-1.8381	0.066049	0.63407	SLC6A9	solute carrier family 6 member 9
55312	-0.2163	1670.9	0.11768	-1.838	0.066057	0.63407	RFK	riboflavin kinase
9034	-0.338	768.71	0.18403	-1.8366	0.066262	0.63407	CCRL2	C-C motif chemokine receptor like 2
5093	-0.12434	9259.5	0.067703	-1.8365	0.066281	0.63407	PCBP1	poly(rC) binding protein 1
100507303	-0.8116	205.01	0.44193	-1.8365	0.066284	0.63407	SNHG19	small nucleolar RNA host gene 19
54943	-0.97804	82.864	0.53256	-1.8365	0.066285	0.63407	DNAJC28	DnaJ heat shock protein family (Hsp40) member C28
419	5.236	6.7989	2.8514	1.8363	0.066315	0.63407	ART3	ADP-ribosyltransferase 3
8533	-0.22504	1624.9	0.12257	-1.836	0.066359	0.63407	COPS3	COP9 signalosome subunit 3
25793	-0.15375	3366.8	0.083743	-1.8359	0.066369	0.63407	FBXO7	F-box protein 7
3978	0.1692	3580.4	0.092173	1.8357	0.066399	0.63407	LIG1	DNA ligase 1
4756	5.6606	4.1205	3.0841	1.8354	0.066445	0.63407	NEO1	neogenin 1
55119	0.17319	3178	0.094376	1.8351	0.066487	0.63407	PRPF38B	pre-mRNA processing factor 38B
81552	-0.13921	5552.2	0.075859	-1.8351	0.066489	0.63407	VOPP1	VOPP1 WW domain binding protein
643677	-2.325	14.292	1.2671	-1.8348	0.066531	0.63407	CCDC168	coiled-coil domain containing 168
400581	0.33448	688.77	0.1823	1.8347	0.066545	0.63407	GRAPL	GRB2 related adaptor protein like
58484	-5.8308	4.23	3.1787	-1.8343	0.066608	0.63407	NLRC4	NLR family CARD domain containing 4
6217	-0.12603	14157	0.068713	-1.8342	0.066624	0.63407	RPS16	ribosomal protein S16
8681	0.3437	707.79	0.1874	1.834	0.066648	0.63407	JMJD7-PLA2G4B	JMJD7-PLA2G4B readthrough
222223	0.24498	1467	0.1336	1.8337	0.066704	0.63407	KIAA1324L	KIAA1324 like
85395	-0.36261	890.91	0.19779	-1.8333	0.066758	0.63407	FAM207A	family with sequence similarity 207 member A
23376	0.26091	1364.9	0.14232	1.8332	0.066775	0.63407	UFL1	UFM1 specific ligase 1
824	0.081588	23805	0.044509	1.833	0.066797	0.63407	CAPN2	calpain 2
94	0.098681	12330	0.053849	1.8326	0.066869	0.63429	ACVRL1	activin A receptor like type 1
6196	0.12709	11976	0.069365	1.8322	0.066915	0.63429	RPS6KA2	ribosomal protein S6 kinase A2
89797	0.1014	16028	0.055389	1.8307	0.067141	0.63598	NAV2	neuron navigator 2
7327	0.13735	6887.5	0.075049	1.8302	0.067222	0.63598	UBE2G2	ubiquitin conjugating enzyme E2 G2
4728	-0.20165	2304.9	0.11023	-1.8294	0.067343	0.63598	NDUFS8	NADH:ubiquinone oxidoreductase core subunit S8
55102	0.18714	2505.7	0.10232	1.829	0.067398	0.63598	ATG2B	autophagy related 2B
79066	-0.24653	1370.4	0.13481	-1.8287	0.067448	0.63598	METTL16	methyltransferase like 16
1337	-0.20355	3061.9	0.11131	-1.8286	0.067463	0.63598	COX6A1	cytochrome c oxidase subunit 6A1
3613	-0.95692	89.466	0.52333	-1.8285	0.067471	0.63598	IMPA2	inositol monophosphatase 2
782	0.35543	770.18	0.19439	1.8285	0.067478	0.63598	CACNB1	calcium voltage-gated channel auxiliary subunit beta 1
91749	-0.23942	1457.1	0.13096	-1.8282	0.067522	0.63598	MFSD4B	major facilitator superfamily domain containing 4B
23359	-5.48	5.4895	2.9983	-1.8277	0.067591	0.63618	FAM189A1	family with sequence similarity 189 member A1
25875	0.26089	1388	0.14278	1.8273	0.067657	0.63619	LETMD1	LETM1 domain containing 1
23309	0.13243	7189.6	0.072489	1.8269	0.067713	0.63619	SIN3B	SIN3 transcription regulator family member B
56894	-0.13643	5187.2	0.074691	-1.8266	0.067759	0.63619	AGPAT3	1-acylglycerol-3-phosphate O-acyltransferase 3
10193	-0.1899	2603.2	0.10397	-1.8265	0.067782	0.63619	RNF41	ring finger protein 41
6194	-0.10078	23232	0.05522	-1.8251	0.067986	0.6374	RPS6	ribosomal protein S6
79605	-4.9414	5.0716	2.7076	-1.825	0.068007	0.6374	PGBD5	piggyBac transposable element derived 5
6124	-0.083747	30185	0.045916	-1.8239	0.068167	0.63842	RPL4	ribosomal protein L4
133522	0.52232	305.44	0.28642	1.8236	0.068211	0.63842	PPARGC1B	PPARG coactivator 1 beta
64925	-0.34421	680.86	0.18886	-1.8226	0.068361	0.63878	CCDC71	coiled-coil domain containing 71
10084	-0.23568	1499	0.12934	-1.8222	0.068422	0.63878	PQBP1	polyglutamine binding protein 1
10383	-0.1373	7046.6	0.075348	-1.8222	0.068425	0.63878	TUBB4B	tubulin beta 4B class IVb
1942	0.23332	1389.1	0.12806	1.8219	0.068469	0.63878	EFNA1	ephrin A1
252983	0.43035	578.71	0.23626	1.8215	0.068527	0.63878	STXBP4	syntaxin binding protein 4
55664	-0.38596	572.97	0.21193	-1.8212	0.068578	0.63878	CDC37L1	cell division cycle 37 like 1
56145	4.8517	3.7712	2.6641	1.8211	0.068585	0.63878	PCDHA3	protocadherin alpha 3
83479	0.39934	476.19	0.21937	1.8204	0.068696	0.63938	DDX59	DEAD-box helicase 59
6448	0.15747	5212.8	0.086558	1.8192	0.068873	0.64011	SGSH	N-sulfoglucosamine sulfohydrolase
23770	-0.1835	9043.9	0.10087	-1.8192	0.068885	0.64011	FKBP8	FKBP prolyl isomerase 8
1535	-0.33753	825.16	0.18556	-1.819	0.068919	0.64011	CYBA	cytochrome b-245 alpha chain
8559	-0.31264	814.06	0.17195	-1.8182	0.06903	0.64012	PRPF18	pre-mRNA processing factor 18
91056	-0.27575	1958.1	0.15166	-1.8182	0.06904	0.64012	AP5B1	adaptor related protein complex 5 subunit beta 1
4054	0.14865	9208.1	0.081763	1.818	0.069063	0.64012	LTBP3	latent transforming growth factor beta binding protein 3
54840	-0.29096	1243	0.16009	-1.8174	0.069152	0.64046	APTX	aprataxin
10866	0.64534	207.92	0.35514	1.8171	0.069196	0.64046	HCP5	HLA complex P5
11136	3.7103	9.5916	2.0428	1.8163	0.069323	0.64101	SLC7A9	solute carrier family 7 member 9
90806	0.32877	997.39	0.18103	1.8161	0.069352	0.64101	ANGEL2	angel homolog 2
2222	-0.23653	1783	0.13037	-1.8143	0.069639	0.64322	FDFT1	farnesyl-diphosphate farnesyltransferase 1
254827	0.86031	140.89	0.47433	1.8137	0.069717	0.64334	NAALADL2	N-acetylated alpha-linked acidic dipeptidase like 2
79611	5.9165	4.9648	3.2624	1.8135	0.069748	0.64334	ACSS3	acyl-CoA synthetase short chain family member 3
64761	-0.16235	3693.9	0.089548	-1.813	0.069827	0.64337	PARP12	poly(ADP-ribose) polymerase family member 12
2068	0.20538	2528.6	0.11329	1.8129	0.069847	0.64337	ERCC2	"ERCC excision repair 2, TFIIH core complex helicase subunit"
8411	0.17678	4171.8	0.097579	1.8117	0.070033	0.64464	EEA1	early endosome antigen 1
51203	-1.1	64.232	0.60733	-1.8112	0.070108	0.64477	NUSAP1	nucleolar and spindle associated protein 1
100506012	-1.8569	24.401	1.0254	-1.8109	0.070155	0.64477	PPP5D1	PPP5 tetratricopeptide repeat domain containing 1
29121	0.67691	158.4	0.37384	1.8107	0.070193	0.64477	CLEC2D	C-type lectin domain family 2 member D
149603	-0.16951	5289.7	0.093638	-1.8103	0.070246	0.64482	RNF187	ring finger protein 187
3609	0.12271	11389	0.067815	1.8094	0.070385	0.64521	ILF3	interleukin enhancer binding factor 3
29911	0.3122	1248.4	0.17254	1.8094	0.070387	0.64521	HOOK2	hook microtubule tethering protein 2
168850	-0.22936	1485.4	0.12678	-1.8091	0.070434	0.64521	ZNF800	zinc finger protein 800
84441	-0.22881	2058.7	0.12654	-1.8082	0.070569	0.64575	MAML2	mastermind like transcriptional coactivator 2
57609	-0.15307	3813.5	0.084655	-1.8081	0.070589	0.64575	DIP2B	disco interacting protein 2 homolog B
29775	0.18459	2929	0.10219	1.8063	0.070875	0.64629	CARD10	caspase recruitment domain family member 10
79171	-0.18631	3238.4	0.10315	-1.8063	0.070879	0.64629	RBM42	RNA binding motif protein 42
813	0.083696	21549	0.046339	1.8062	0.07089	0.64629	CALU	calumenin
22981	0.31878	1055.2	0.1765	1.8061	0.0709	0.64629	NINL	ninein like
345895	4.9451	7.4219	2.738	1.8061	0.070902	0.64629	RSPH4A	radial spoke head component 4A
25959	0.19452	3363.9	0.10775	1.8053	0.07103	0.64629	KANK2	KN motif and ankyrin repeat domains 2
5069	1.1303	61.366	0.62614	1.8052	0.071041	0.64629	PAPPA	pappalysin 1
285672	-0.19677	1973.3	0.10902	-1.8048	0.071109	0.64629	SREK1IP1	SREK1 interacting protein 1
80762	-0.15517	4660.6	0.085979	-1.8047	0.071121	0.64629	NDFIP1	Nedd4 family interacting protein 1
113278	5.4176	5.2125	3.002	1.8046	0.071132	0.64629	SLC52A3	solute carrier family 52 member 3
23461	0.27978	1364.4	0.15518	1.803	0.071393	0.64822	ABCA5	ATP binding cassette subfamily A member 5
1769	3.9588	6.468	2.1963	1.8025	0.071475	0.64843	DNAH8	dynein axonemal heavy chain 8
54888	0.15518	3743.7	0.086163	1.8011	0.071693	0.64843	NSUN2	NOP2/Sun RNA methyltransferase 2
56938	-0.21773	2557.7	0.12089	-1.8011	0.071695	0.64843	ARNTL2	aryl hydrocarbon receptor nuclear translocator like 2
84334	-0.26328	1256.6	0.14618	-1.801	0.071698	0.64843	COA8	cytochrome c oxidase assembly factor 8
2309	0.18549	2820.1	0.103	1.8008	0.071733	0.64843	FOXO3	forkhead box O3
2729	0.21995	1605.3	0.12217	1.8004	0.071803	0.64843	GCLC	glutamate-cysteine ligase catalytic subunit
3213	0.24545	1368.6	0.13635	1.8001	0.071843	0.64843	HOXB3	homeobox B3
51719	0.14291	6281.2	0.079396	1.8	0.071867	0.64843	CAB39	calcium binding protein 39
101927957	-1.6706	34.659	0.92824	-1.7998	0.071896	0.64843	LINC01572	long intergenic non-protein coding RNA 1572
84676	-4.2084	9.3541	2.3389	-1.7993	0.071975	0.64843	TRIM63	tripartite motif containing 63
9552	-0.25277	1323.5	0.14053	-1.7986	0.072077	0.64843	SPAG7	sperm associated antigen 7
10960	-0.12692	8051.9	0.070577	-1.7983	0.072122	0.64843	LMAN2	"lectin, mannose binding 2"
51246	-0.12862	11006	0.071527	-1.7982	0.072141	0.64843	SHISA5	shisa family member 5
29100	-0.32085	710.77	0.17843	-1.7981	0.072157	0.64843	TMEM208	transmembrane protein 208
55352	-0.29706	1117.4	0.16521	-1.7981	0.072161	0.64843	COPRS	coordinator of PRMT5 and differentiation stimulator
3875	-0.21214	1906.5	0.11802	-1.7975	0.072259	0.64843	KRT18	keratin 18
255324	1.2075	46.873	0.6719	1.7972	0.072302	0.64843	EPGN	epithelial mitogen
9967	0.12829	8316.1	0.071391	1.797	0.072338	0.64843	THRAP3	thyroid hormone receptor associated protein 3
10523	0.22575	2442	0.12563	1.7969	0.072349	0.64843	CHERP	calcium homeostasis endoplasmic reticulum protein
57494	0.13897	5408.9	0.077349	1.7967	0.072388	0.64843	RIMKLB	ribosomal modification protein rimK like family member B
521	-0.31119	1173.1	0.17325	-1.7962	0.072467	0.64856	ATP5ME	ATP synthase membrane subunit e
2534	-0.12278	5908.5	0.068367	-1.796	0.072499	0.64856	FYN	"FYN proto-oncogene, Src family tyrosine kinase"
874	-0.58395	382.13	0.32523	-1.7955	0.072573	0.64868	CBR3	carbonyl reductase 3
9771	0.21704	2431.5	0.1209	1.7953	0.07261	0.64868	RAPGEF5	Rap guanine nucleotide exchange factor 5
113178	-0.17286	5078.9	0.096322	-1.7947	0.072708	0.64912	SCAMP4	secretory carrier membrane protein 4
54916	0.28084	1072.4	0.15653	1.7941	0.072795	0.64947	TMEM260	transmembrane protein 260
170384	0.19732	2656.7	0.11001	1.7937	0.072866	0.64967	FUT11	fucosyltransferase 11
284352	-0.22749	2862	0.12687	-1.7931	0.072952	0.64985	PPP1R37	protein phosphatase 1 regulatory subunit 37
339451	0.30717	1081.2	0.17132	1.7929	0.072984	0.64985	KLHL17	kelch like family member 17
10418	-5.7052	5.9454	3.1828	-1.7925	0.073051	0.65001	SPON1	spondin 1
26024	0.31483	977.17	0.1757	1.7919	0.073155	0.65051	PTCD1	pentatricopeptide repeat domain 1
23187	0.14894	8486	0.083169	1.7908	0.07333	0.65126	PHLDB1	pleckstrin homology like domain family B member 1
440854	4.8844	4.7549	2.7277	1.7906	0.07335	0.65126	CAPN14	calpain 14
203102	-2.156	28.426	1.2042	-1.7904	0.073387	0.65126	ADAM32	ADAM metallopeptidase domain 32
140467	-0.24192	2398.9	0.13516	-1.7899	0.073469	0.65157	ZNF358	zinc finger protein 358
93594	0.57593	219.95	0.32185	1.7894	0.073548	0.65183	TBC1D31	TBC1 domain family member 31
54471	-0.22748	2418.7	0.12715	-1.7891	0.073603	0.65188	MIEF1	mitochondrial elongation factor 1
57165	-1.095	76.38	0.61216	-1.7887	0.073661	0.65191	GJC2	gap junction protein gamma 2
975	-0.093819	27130	0.05246	-1.7884	0.07371	0.65191	CD81	CD81 molecule
10075	0.10115	14194	0.056576	1.7878	0.073807	0.65191	HUWE1	"HECT, UBA and WWE domain containing E3 ubiquitin protein ligase 1"
1891	-0.18148	2230.6	0.10154	-1.7872	0.073901	0.65191	ECH1	enoyl-CoA hydratase 1
55626	-0.22604	1887.5	0.12649	-1.787	0.073938	0.65191	AMBRA1	autophagy and beclin 1 regulator 1
719	-1.8892	20.23	1.0572	-1.7869	0.073947	0.65191	C3AR1	complement C3a receptor 1
158376	1.0874	78.687	0.60853	1.7869	0.07396	0.65191	SPAAR	small regulatory polypeptide of amino acid response
2736	1.7273	24.12	0.9668	1.7866	0.073996	0.65191	GLI2	GLI family zinc finger 2
284252	-0.32005	840.25	0.17924	-1.7855	0.074173	0.65304	KCTD1	potassium channel tetramerization domain containing 1
147179	-0.17149	4981.1	0.096112	-1.7843	0.074382	0.65416	WIPF2	WAS/WASL interacting protein family member 2
57171	0.42141	545.68	0.2362	1.7842	0.074399	0.65416	DOLPP1	dolichyldiphosphatase 1
54499	-0.18198	2237.9	0.10211	-1.7822	0.074721	0.65583	TMCO1	transmembrane and coiled-coil domains 1
55129	-0.1538	4284.7	0.08632	-1.7818	0.074783	0.65583	ANO10	anoctamin 10
343521	-7.4527	13.542	4.1833	-1.7815	0.074825	0.65583	TCTEX1D4	Tctex1 domain containing 4
119504	-0.2132	2341.1	0.11968	-1.7815	0.074831	0.65583	ANAPC16	anaphase promoting complex subunit 16
819	-0.18984	2152.7	0.10657	-1.7815	0.074834	0.65583	CAMLG	calcium modulating ligand
27122	0.076929	25112	0.043196	1.7809	0.074923	0.65618	DKK3	dickkopf WNT signaling pathway inhibitor 3
3214	0.40271	587.84	0.22619	1.7804	0.075008	0.65627	HOXB4	homeobox B4
83658	-0.16441	3143	0.09235	-1.7803	0.075031	0.65627	DYNLRB1	dynein light chain roadblock-type 1
338657	0.25658	1176.4	0.14416	1.7798	0.075115	0.65648	CCDC84	coiled-coil domain containing 84
83723	5.8887	5.4382	3.3091	1.7795	0.075154	0.65648	TLCD3B	TLC domain containing 3B
26985	0.16501	3032.8	0.092764	1.7788	0.075268	0.65689	AP3M1	adaptor related protein complex 3 subunit mu 1
139735	-1.2656	63.348	0.71156	-1.7786	0.075299	0.65689	ZFP92	ZFP92 zinc finger protein
55070	-0.79567	194.49	0.44758	-1.7777	0.075449	0.65776	DET1	DET1 partner of COP1 E3 ubiquitin ligase
85015	0.37941	587.64	0.21354	1.7767	0.075616	0.65874	USP45	ubiquitin specific peptidase 45
26088	0.15651	3271.6	0.088102	1.7764	0.07566	0.65874	GGA1	"golgi associated, gamma adaptin ear containing, ARF binding protein 1"
7555	-0.13652	7393	0.076907	-1.7751	0.075879	0.66022	CNBP	CCHC-type zinc finger nucleic acid binding protein
29015	-0.20668	2932	0.11651	-1.774	0.076058	0.66075	SLC43A3	solute carrier family 43 member 3
78996	-0.39539	463.92	0.22288	-1.774	0.07606	0.66075	CYREN	cell cycle regulator of NHEJ
11014	-0.10766	8573.6	0.060707	-1.7735	0.076152	0.66075	KDELR2	KDEL endoplasmic reticulum protein retention receptor 2
54103	0.34992	560.6	0.19735	1.7731	0.076216	0.66075	GSAP	gamma-secretase activating protein
57085	-0.16871	2687.4	0.095169	-1.7727	0.076271	0.66075	AGTRAP	angiotensin II receptor associated protein
9123	-0.13766	11164	0.077654	-1.7727	0.076272	0.66075	SLC16A3	solute carrier family 16 member 3
6760	0.15068	3455.4	0.085003	1.7727	0.076286	0.66075	SS18	SS18 subunit of BAF chromatin remodeling complex
283871	-0.25564	1180.6	0.14425	-1.7722	0.076361	0.6608	PGP	phosphoglycolate phosphatase
84681	-0.43265	501.96	0.24419	-1.7718	0.076426	0.6608	HINT2	histidine triad nucleotide binding protein 2
716	-0.37884	553.53	0.21382	-1.7717	0.076441	0.6608	C1S	complement C1s
4646	0.1337	6564	0.075486	1.7712	0.07652	0.66106	MYO6	myosin VI
57140	-0.19418	4301.4	0.10967	-1.7706	0.076634	0.66125	RNPEPL1	arginyl aminopeptidase like 1
83543	0.40872	459.13	0.23085	1.7705	0.076641	0.66125	AIF1L	allograft inflammatory factor 1 like
63906	-0.37779	815.9	0.21375	-1.7675	0.077152	0.66523	GPATCH3	G-patch domain containing 3
7088	-0.19971	2863.6	0.11302	-1.767	0.077231	0.66548	TLE1	"TLE family member 1, transcriptional corepressor"
140894	2.8806	15.922	1.6309	1.7663	0.077351	0.66607	CNBD2	cyclic nucleotide binding domain containing 2
23385	0.1192	8015.4	0.0675	1.7659	0.077415	0.66607	NCSTN	nicastrin
80008	-0.58351	211.78	0.33047	-1.7657	0.077449	0.66607	TMEM156	transmembrane protein 156
5757	-0.10497	16641	0.059507	-1.764	0.077736	0.66608	PTMA	prothymosin alpha
84679	0.22049	1866.3	0.12501	1.7638	0.077772	0.66608	SLC9A7	solute carrier family 9 member A7
3918	0.40109	597.45	0.22741	1.7637	0.077783	0.66608	LAMC2	laminin subunit gamma 2
8444	0.23417	1759	0.1328	1.7633	0.077843	0.66608	DYRK3	dual specificity tyrosine phosphorylation regulated kinase 3
6737	-0.20318	1875.7	0.11523	-1.7633	0.077857	0.66608	TRIM21	tripartite motif containing 21
56339	0.23677	1335.2	0.13428	1.7632	0.077868	0.66608	METTL3	methyltransferase like 3
393	0.29127	832.7	0.1652	1.7631	0.07788	0.66608	ARHGAP4	Rho GTPase activating protein 4
4055	-0.16118	6843.7	0.091416	-1.7631	0.077881	0.66608	LTBR	lymphotoxin beta receptor
192286	-0.26423	1229.1	0.14988	-1.763	0.077899	0.66608	HIGD2A	HIG1 hypoxia inducible domain family member 2A
81550	0.32995	714.64	0.18722	1.7624	0.07801	0.66644	TDRD3	tudor domain containing 3
26499	-0.58277	276.26	0.33071	-1.7622	0.07804	0.66644	PLEK2	pleckstrin 2
5994	-0.52377	259.79	0.29736	-1.7614	0.078171	0.66712	RFXAP	regulatory factor X associated protein
54834	-0.32023	984.65	0.18184	-1.761	0.078234	0.66724	GDAP2	ganglioside induced differentiation associated protein 2
6628	-0.14435	5108.9	0.081981	-1.7607	0.078285	0.66725	SNRPB	small nuclear ribonucleoprotein polypeptides B and B1
80267	0.19241	2921.8	0.10939	1.7589	0.07859	0.66942	EDEM3	ER degradation enhancing alpha-mannosidase like protein 3
5218	-0.39929	480.34	0.22724	-1.7571	0.078894	0.67075	CDK14	cyclin dependent kinase 14
9066	-1.7417	22.108	0.99136	-1.7569	0.078938	0.67075	SYT7	synaptotagmin 7
9572	-0.26037	1774.6	0.14822	-1.7566	0.078984	0.67075	NR1D1	nuclear receptor subfamily 1 group D member 1
221035	0.12945	5014.8	0.073697	1.7565	0.078998	0.67075	REEP3	receptor accessory protein 3
8817	5.4178	6.9373	3.086	1.7556	0.079152	0.67075	FGF18	fibroblast growth factor 18
3431	-0.18994	2154.4	0.10819	-1.7556	0.079162	0.67075	SP110	SP110 nuclear body protein
131890	5.1365	5.4217	2.926	1.7555	0.07918	0.67075	GRK7	G protein-coupled receptor kinase 7
9125	0.22333	2000.9	0.12722	1.7555	0.079181	0.67075	CNOT9	CCR4-NOT transcription complex subunit 9
56259	-0.23129	1608.9	0.13176	-1.7554	0.079198	0.67075	CTNNBL1	catenin beta like 1
29085	-0.18133	3098.4	0.10332	-1.755	0.079256	0.67082	PHPT1	phosphohistidine phosphatase 1
120103	-0.37729	633.58	0.2151	-1.754	0.079432	0.67125	SLC36A4	solute carrier family 36 member 4
64397	0.15613	4470.6	0.08908	1.7527	0.07965	0.67125	ZNF106	zinc finger protein 106
26999	-0.16845	3187.2	0.09611	-1.7527	0.079659	0.67125	CYFIP2	cytoplasmic FMR1 interacting protein 2
10869	0.20299	2631.6	0.11585	1.7522	0.079739	0.67125	USP19	ubiquitin specific peptidase 19
10015	0.10691	11294	0.06102	1.7521	0.079753	0.67125	PDCD6IP	programmed cell death 6 interacting protein
6310	-0.21157	1680.2	0.12078	-1.7516	0.079836	0.67125	ATXN1	ataxin 1
54431	0.11556	8455.9	0.065991	1.7511	0.079926	0.67125	DNAJC10	DnaJ heat shock protein family (Hsp40) member C10
1137	5.4178	4.6532	3.0947	1.7507	0.080001	0.67125	CHRNA4	cholinergic receptor nicotinic alpha 4 subunit
775	5.1997	5.456	2.9707	1.7503	0.080066	0.67125	CACNA1C	calcium voltage-gated channel subunit alpha1 C
84733	0.34781	833.24	0.19883	1.7493	0.080234	0.67125	CBX2	chromobox 2
9686	0.19893	2553.7	0.11373	1.7491	0.080266	0.67125	VGLL4	vestigial like family member 4
55308	-0.19948	1905.5	0.11407	-1.7488	0.080327	0.67125	DDX19A	DEAD-box helicase 19A
54512	-0.432	385.28	0.24707	-1.7485	0.080378	0.67125	EXOSC4	exosome component 4
284565	0.17758	3007.8	0.10158	1.7483	0.080416	0.67125	NBPF15	NBPF member 15
22828	0.20587	2111.7	0.11776	1.7482	0.080428	0.67125	SCAF8	SR-related CTD associated factor 8
483	-0.10174	13101	0.058201	-1.748	0.080462	0.67125	ATP1B3	ATPase Na+/K+ transporting subunit beta 3
51187	-0.20147	2489.2	0.11526	-1.748	0.080466	0.67125	RSL24D1	ribosomal L24 domain containing 1
55593	-0.17819	3096.7	0.10194	-1.7479	0.080473	0.67125	OTUD5	OTU deubiquitinase 5
478	-3.4856	7.3634	1.9942	-1.7479	0.080481	0.67125	ATP1A3	ATPase Na+/K+ transporting subunit alpha 3
55844	-0.23572	1646.9	0.13489	-1.7475	0.08055	0.67125	PPP2R2D	protein phosphatase 2 regulatory subunit Bdelta
283578	-0.24608	1234.9	0.14083	-1.7473	0.080579	0.67125	TMED8	transmembrane p24 trafficking protein family member 8
203074	-6.0097	4.7704	3.4394	-1.7473	0.080584	0.67125	PRSS55	serine protease 55
64412	-0.29869	882.48	0.17095	-1.7472	0.080598	0.67125	GZF1	GDNF inducible zinc finger protein 1
2628	3.3426	9.8564	1.9133	1.747	0.080634	0.67125	GATM	glycine amidinotransferase
22889	0.16122	3024.3	0.092294	1.7468	0.080664	0.67125	KHDC4	"KH domain containing 4, pre-mRNA splicing factor"
9229	-4.9946	4.5045	2.8594	-1.7467	0.08069	0.67125	DLGAP1	DLG associated protein 1
26164	0.25748	1233.4	0.14742	1.7466	0.080702	0.67125	MTG2	mitochondrial ribosome associated GTPase 2
79982	0.16581	3155.2	0.094936	1.7466	0.080715	0.67125	DNAJB14	DnaJ heat shock protein family (Hsp40) member B14
10723	0.14559	4779.9	0.083461	1.7444	0.081089	0.67312	SLC12A7	solute carrier family 12 member 7
2246	4.5994	5.6714	2.6368	1.7443	0.081101	0.67312	FGF1	fibroblast growth factor 1
8986	-0.24011	2013.6	0.13768	-1.7439	0.081179	0.67312	RPS6KA4	ribosomal protein S6 kinase A4
90488	0.14607	3356.1	0.083784	1.7435	0.081252	0.67312	TMEM263	transmembrane protein 263
51380	0.38188	764.03	0.21912	1.7428	0.081362	0.67312	CSAD	cysteine sulfinic acid decarboxylase
9526	-0.19333	1834.6	0.11094	-1.7427	0.081392	0.67312	MPDU1	mannose-P-dolichol utilization defect 1
6647	-0.17137	4945.1	0.098341	-1.7426	0.081395	0.67312	SOD1	superoxide dismutase 1
151636	-0.13156	6623.7	0.075516	-1.7421	0.081482	0.67312	DTX3L	deltex E3 ubiquitin ligase 3L
55719	0.21158	1910.3	0.12146	1.742	0.081502	0.67312	SLF2	SMC5-SMC6 complex localization factor 2
63943	-0.86318	174.32	0.49552	-1.742	0.081513	0.67312	FKBPL	FKBP prolyl isomerase like
4130	0.23619	1754	0.13559	1.742	0.081516	0.67312	MAP1A	microtubule associated protein 1A
9263	-0.14493	4035.9	0.083236	-1.7412	0.081643	0.67312	STK17A	serine/threonine kinase 17a
79101	0.13727	4707.2	0.078838	1.7411	0.081667	0.67312	TAF1D	"TATA-box binding protein associated factor, RNA polymerase I subunit D"
9720	2.7857	159.93	1.6004	1.7406	0.081754	0.67312	CCDC144A	coiled-coil domain containing 144A
9829	0.3465	566.73	0.19909	1.7404	0.081783	0.67312	DNAJC6	DnaJ heat shock protein family (Hsp40) member C6
3181	0.083483	20755	0.047979	1.74	0.08186	0.67312	HNRNPA2B1	heterogeneous nuclear ribonucleoprotein A2/B1
93	0.39183	578.69	0.2252	1.7399	0.081871	0.67312	ACVR2B	activin A receptor type 2B
88745	-0.23589	1418.7	0.13558	-1.7399	0.081877	0.67312	RRP36	ribosomal RNA processing 36
123803	-0.20391	2550.6	0.1172	-1.7398	0.081898	0.67312	NTAN1	N-terminal asparagine amidase
2197	-0.14475	6753.7	0.083226	-1.7393	0.081989	0.67346	FAU	FAU ubiquitin like and ribosomal protein S30 fusion
57613	0.36945	549.9	0.21252	1.7384	0.082138	0.67402	FAM234B	family with sequence similarity 234 member B
64285	0.14477	5594.6	0.083311	1.7378	0.082254	0.67402	RHBDF1	rhomboid 5 homolog 1
51340	-0.23697	1365	0.13641	-1.7372	0.082348	0.67402	CRNKL1	crooked neck pre-mRNA splicing factor 1
1161	-0.33775	582.63	0.19444	-1.7371	0.082369	0.67402	ERCC8	"ERCC excision repair 8, CSA ubiquitin ligase complex subunit"
57017	-0.26315	1225.8	0.15151	-1.7368	0.082423	0.67402	COQ9	coenzyme Q9
84294	-0.31705	673.21	0.18256	-1.7367	0.082446	0.67402	UTP23	UTP23 small subunit processome component
23505	0.14237	3680.4	0.081987	1.7365	0.082472	0.67402	TMEM131	transmembrane protein 131
114825	-0.2859	859.7	0.16466	-1.7363	0.082508	0.67402	PWWP2A	PWWP domain containing 2A
30811	2.7312	14.655	1.573	1.7363	0.082511	0.67402	HUNK	hormonally up-regulated Neu-associated kinase
6890	-0.13172	5989.6	0.075908	-1.7353	0.082686	0.67479	TAP1	"transporter 1, ATP binding cassette subfamily B member"
5802	0.32444	914.74	0.18697	1.7352	0.082706	0.67479	PTPRS	protein tyrosine phosphatase receptor type S
101060684	0.24388	1332.7	0.14067	1.7337	0.082976	0.67638	NBPF26	NBPF member 26
57461	0.25686	1440	0.14818	1.7335	0.083003	0.67638	ISY1	ISY1 splicing factor homolog
4731	0.19163	2003.9	0.11057	1.7331	0.083078	0.67649	NDUFV3	NADH:ubiquinone oxidoreductase subunit V3
26233	0.3059	959.4	0.17653	1.7329	0.083118	0.67649	FBXL6	F-box and leucine rich repeat protein 6
25794	1.3567	36.25	0.78321	1.7322	0.08324	0.67707	FSCN2	"fascin actin-bundling protein 2, retinal"
146664	-0.74992	126.73	0.43335	-1.7305	0.083542	0.67849	MGAT5B	"alpha-1,6-mannosylglycoprotein 6-beta-N-acetylglucosaminyltransferase B"
24	0.97215	92.03	0.56196	1.7299	0.083642	0.67849	ABCA4	ATP binding cassette subfamily A member 4
24137	1.384	46.477	0.80007	1.7299	0.083649	0.67849	KIF4A	kinesin family member 4A
22843	2.5916	13.216	1.4982	1.7298	0.083674	0.67849	PPM1E	"protein phosphatase, Mg2+/Mn2+ dependent 1E"
23308	0.19704	2033	0.11391	1.7297	0.083683	0.67849	ICOSLG	inducible T cell costimulator ligand
105372401	-0.71978	128.9	0.41618	-1.7295	0.08372	0.67849	105372401	NA
19	0.32425	1634.9	0.18752	1.7292	0.083774	0.67853	ABCA1	ATP binding cassette subfamily A member 1
23288	0.21908	1913.6	0.12674	1.7285	0.083899	0.67912	IQCE	IQ motif containing E
84984	-0.81395	94.269	0.47113	-1.7277	0.08405	0.67994	CEP19	centrosomal protein 19
3692	-0.17376	3335	0.10062	-1.7268	0.084195	0.68047	EIF6	eukaryotic translation initiation factor 6
65055	-2.6319	20.648	1.5244	-1.7265	0.084258	0.68047	REEP1	receptor accessory protein 1
4000	-0.11416	23808	0.066125	-1.7264	0.084281	0.68047	LMNA	lamin A/C
27238	-0.25951	1128.9	0.15034	-1.7262	0.08432	0.68047	GPKOW	G-patch domain and KOW motifs
79697	0.37343	489.34	0.21644	1.7253	0.084467	0.68125	RIOX1	ribosomal oxygenase 1
5514	0.22361	1670.1	0.12965	1.7247	0.084579	0.68173	PPP1R10	protein phosphatase 1 regulatory subunit 10
55034	0.71376	180.8	0.41411	1.7236	0.084781	0.68268	MOCOS	molybdenum cofactor sulfurase
1917	-0.62947	251.57	0.36528	-1.7232	0.084844	0.68268	EEF1A2	eukaryotic translation elongation factor 1 alpha 2
92421	-5.7051	4.8271	3.3126	-1.7222	0.085029	0.68268	CHMP4C	charged multivesicular body protein 4C
11331	-0.15516	4462.1	0.090096	-1.7222	0.085035	0.68268	PHB2	prohibitin 2
92482	0.29366	738.64	0.17053	1.722	0.085068	0.68268	BBIP1	BBSome interacting protein 1
7528	-0.12197	4998.4	0.070834	-1.722	0.085073	0.68268	YY1	YY1 transcription factor
6626	0.33799	896.07	0.19629	1.7219	0.085085	0.68268	SNRPA	small nuclear ribonucleoprotein polypeptide A
5074	0.15269	4136.9	0.088677	1.7218	0.085105	0.68268	PAWR	pro-apoptotic WT1 regulator
55715	0.30918	843.36	0.1796	1.7215	0.085166	0.68276	DOK4	docking protein 4
30851	-0.16825	4275.5	0.097798	-1.7204	0.085355	0.68386	TAX1BP3	Tax1 binding protein 3
9567	-0.18732	3160.8	0.10892	-1.7197	0.085485	0.68442	GTPBP1	GTP binding protein 1
222171	-2.5841	17.446	1.5029	-1.7193	0.085552	0.68442	PRR15	proline rich 15
4735	0.090314	18468	0.052539	1.719	0.085613	0.68442	SEPTIN2	septin 2
4758	-0.15008	3565.3	0.08731	-1.7189	0.08563	0.68442	NEU1	neuraminidase 1
27291	-0.26395	992.94	0.15363	-1.7181	0.085779	0.68497	R3HCC1L	R3H domain and coiled-coil containing 1 like
4163	0.21788	1642.2	0.12682	1.718	0.085801	0.68497	MCC	MCC regulator of WNT signaling pathway
3082	-1.8657	32.096	1.0864	-1.7174	0.085912	0.68545	HGF	hepatocyte growth factor
64422	-0.21316	2090	0.12421	-1.7161	0.086143	0.68688	ATG3	autophagy related 3
11245	-0.17053	2785.4	0.0994	-1.7156	0.08624	0.68703	GPR176	G protein-coupled receptor 176
401089	-5.7302	3.5918	3.3405	-1.7154	0.08628	0.68703	FOXL2NB	FOXL2 neighbor
6468	-0.27344	995.19	0.15947	-1.7146	0.086411	0.68703	FBXW4	F-box and WD repeat domain containing 4
7318	0.17212	2710.7	0.10039	1.7145	0.086429	0.68703	UBA7	ubiquitin like modifier activating enzyme 7
10296	0.16333	2816	0.095276	1.7143	0.086469	0.68703	MAEA	macrophage erythroblast attacher
7102	-0.25524	1137.1	0.14889	-1.7143	0.08647	0.68703	TSPAN7	tetraspanin 7
4793	-0.21729	1595.3	0.12682	-1.7133	0.086658	0.68765	NFKBIB	NFKB inhibitor beta
8407	-0.10857	14094	0.063374	-1.7132	0.086672	0.68765	TAGLN2	transgelin 2
56478	-0.25133	1215.9	0.14672	-1.7131	0.086702	0.68765	EIF4ENIF1	eukaryotic translation initiation factor 4E nuclear import factor 1
55811	-5.5436	4.1051	3.2368	-1.7127	0.086769	0.68777	ADCY10	adenylate cyclase 10
8396	-0.1588	3869.7	0.092786	-1.7114	0.087005	0.68883	PIP4K2B	phosphatidylinositol-5-phosphate 4-kinase type 2 beta
3275	-0.15659	3731.1	0.091496	-1.7114	0.087006	0.68883	PRMT2	protein arginine methyltransferase 2
201633	5.1368	5.0463	3.0036	1.7102	0.087232	0.69021	TIGIT	T cell immunoreceptor with Ig and ITIM domains
84206	0.3097	876.22	0.18134	1.7079	0.08766	0.69318	MEX3B	mex-3 RNA binding family member B
123688	0.89617	86.714	0.52486	1.7075	0.087736	0.69338	HYKK	hydroxylysine kinase
29880	-0.28633	998.47	0.16773	-1.7071	0.087813	0.69357	ALG5	ALG5 dolichyl-phosphate beta-glucosyltransferase
2834	-5.3562	3.1734	3.1392	-1.7062	0.087963	0.69386	PRLHR	prolactin releasing hormone receptor
55845	-0.13976	4967.9	0.081934	-1.7058	0.08805	0.69386	BRK1	BRICK1 subunit of SCAR/WAVE actin nucleating complex
84691	-5.8112	3.328	3.4068	-1.7058	0.08805	0.69386	FAM71F1	family with sequence similarity 71 member F1
7267	0.10433	8336.1	0.061167	1.7057	0.088058	0.69386	TTC3	tetratricopeptide repeat domain 3
29118	5.9757	4.4957	3.5042	1.7053	0.088143	0.69403	DDX25	DEAD-box helicase 25
22920	-0.2354	1318.5	0.1381	-1.7046	0.088266	0.69403	KIFAP3	kinesin associated protein 3
92017	-0.21887	1807	0.12845	-1.7039	0.088394	0.69403	SNX29	sorting nexin 29
3658	0.24974	1344.9	0.14658	1.7037	0.088435	0.69403	IREB2	iron responsive element binding protein 2
257160	-0.31174	855.17	0.18299	-1.7036	0.088459	0.69403	RNF214	ring finger protein 214
11212	-0.24281	1425.8	0.14253	-1.7035	0.088466	0.69403	PLPBP	pyridoxal phosphate binding protein
11159	0.3967	516.48	0.23291	1.7032	0.088522	0.69403	RABL2A	"RAB, member of RAS oncogene family like 2A"
8660	-0.3551	657.54	0.2085	-1.7031	0.088547	0.69403	IRS2	insulin receptor substrate 2
4637	-0.08068	40946	0.047377	-1.7029	0.088583	0.69403	MYL6	myosin light chain 6
1291	0.23103	1697.8	0.13568	1.7028	0.088599	0.69403	COL6A1	collagen type VI alpha 1 chain
80324	0.26301	1054.4	0.15448	1.7026	0.08865	0.69403	PUS1	pseudouridine synthase 1
57763	0.30967	795.1	0.18192	1.7022	0.08871	0.69409	ANKRA2	ankyrin repeat family A member 2
8820	3.0251	15.434	1.7784	1.701	0.088944	0.69501	HESX1	HESX homeobox 1
100134938	-1.8229	223.85	1.0718	-1.7008	0.088981	0.69501	UPK3BL1	uroplakin 3B like 1
4141	-0.10551	9600	0.062038	-1.7008	0.088984	0.69501	MARS1	methionyl-tRNA synthetase 1
1845	-0.12755	5387.2	0.075006	-1.7005	0.089038	0.69503	DUSP3	dual specificity phosphatase 3
157657	-0.78045	102.01	0.45911	-1.6999	0.089148	0.69537	C8orf37	chromosome 8 open reading frame 37
3892	-5.2091	3.3549	3.0648	-1.6997	0.089191	0.69537	KRT86	keratin 86
57698	0.21408	2226	0.12597	1.6994	0.089239	0.69537	SHTN1	shootin 1
8453	0.14928	3326.7	0.087869	1.6989	0.089342	0.69551	CUL2	cullin 2
4697	-0.18368	2513.5	0.10814	-1.6986	0.0894	0.69551	NDUFA4	NDUFA4 mitochondrial complex associated
6205	-0.10971	19162	0.064625	-1.6977	0.089567	0.69551	RPS11	ribosomal protein S11
60312	0.097563	10031	0.057478	1.6974	0.08962	0.69551	AFAP1	actin filament associated protein 1
64781	0.17392	5005	0.10247	1.6973	0.089647	0.69551	CERK	ceramide kinase
55625	0.14786	3078.3	0.087127	1.6971	0.089681	0.69551	ZDHHC7	zinc finger DHHC-type palmitoyltransferase 7
80772	-0.22889	1356.6	0.13488	-1.697	0.089702	0.69551	CPTP	ceramide-1-phosphate transfer protein
200185	-0.24209	2116.8	0.14267	-1.6969	0.08972	0.69551	KRTCAP2	keratinocyte associated protein 2
83700	0.13312	4883.2	0.078453	1.6969	0.089724	0.69551	JAM3	junctional adhesion molecule 3
51337	-0.33905	754.32	0.19987	-1.6964	0.089819	0.69566	THEM6	thioesterase superfamily member 6
25859	3.7077	6.701	2.1859	1.6962	0.089848	0.69566	PART1	prostate androgen-regulated transcript 1
26002	4.4948	7.9432	2.6521	1.6948	0.090114	0.69669	MOXD1	monooxygenase DBH like 1
6506	-5.823	3.2107	3.4358	-1.6948	0.090116	0.69669	SLC1A2	solute carrier family 1 member 2
9057	0.21681	2637.3	0.12794	1.6947	0.090138	0.69669	SLC7A6	solute carrier family 7 member 6
5315	-0.11597	45405	0.068504	-1.6929	0.090468	0.6976	PKM	pyruvate kinase M1/2
8777	0.12591	4826.6	0.074391	1.6925	0.090555	0.6976	MPDZ	multiple PDZ domain crumbs cell polarity complex component
6861	-5.3185	3.93	3.1458	-1.6907	0.090902	0.6976	SYT5	synaptotagmin 5
10575	-0.11291	6739.5	0.066788	-1.6905	0.090933	0.6976	CCT4	chaperonin containing TCP1 subunit 4
6594	0.17044	2750.4	0.10084	1.6902	0.090995	0.6976	SMARCA1	"SWI/SNF related, matrix associated, actin dependent regulator of chromatin, subfamily a, member 1"
4772	0.23165	1727.4	0.13708	1.69	0.091033	0.6976	NFATC1	nuclear factor of activated T cells 1
125965	5.2828	3.1649	3.1263	1.6898	0.091069	0.6976	COX6B2	cytochrome c oxidase subunit 6B2
9092	-0.15488	3879.1	0.091661	-1.6897	0.091076	0.6976	SART1	"spliceosome associated factor 1, recruiter of U4/U6.U5 tri-snRNP"
51807	-1.1278	78.667	0.66747	-1.6897	0.09109	0.6976	TUBA8	tubulin alpha 8
5099	0.54835	257.12	0.32456	1.6895	0.091116	0.6976	PCDH7	protocadherin 7
51073	-0.21845	1459.4	0.1293	-1.6895	0.091127	0.6976	MRPL4	mitochondrial ribosomal protein L4
2290	1.2656	36.097	0.7492	1.6893	0.091159	0.6976	FOXG1	forkhead box G1
148170	-0.2013	2660.5	0.11918	-1.689	0.091213	0.6976	CDC42EP5	CDC42 effector protein 5
51678	0.30333	726.69	0.17959	1.689	0.091217	0.6976	MPP6	membrane palmitoylated protein 6
10078	-0.23536	1487	0.13935	-1.689	0.091225	0.6976	TSSC4	tumor suppressing subtransferable candidate 4
10158	2.6338	11.339	1.56	1.6883	0.091351	0.6976	PDZK1IP1	PDZK1 interacting protein 1
4154	0.1167	9430.9	0.069124	1.6883	0.091352	0.6976	MBNL1	muscleblind like splicing regulator 1
51754	0.33805	550.83	0.20023	1.6883	0.091354	0.6976	TMEM8B	transmembrane protein 8B
10954	0.16455	3366.4	0.097479	1.688	0.091404	0.6976	PDIA5	protein disulfide isomerase family A member 5
9772	0.19066	2550	0.11298	1.6876	0.091488	0.6976	TMEM94	transmembrane protein 94
114928	0.33213	861.86	0.19683	1.6874	0.091518	0.6976	GPRASP2	G protein-coupled receptor associated sorting protein 2
10955	0.10624	10153	0.062961	1.6874	0.091536	0.6976	SERINC3	serine incorporator 3
54555	-0.2799	1408.1	0.16588	-1.6873	0.091537	0.6976	DDX49	DEAD-box helicase 49
146456	-2.7153	8.9657	1.6095	-1.6871	0.091591	0.6976	TMED6	transmembrane p24 trafficking protein 6
84250	-0.63676	202.99	0.37748	-1.6869	0.091627	0.6976	SLF1	SMC5-SMC6 complex localization factor 1
5903	0.12526	9558.6	0.074263	1.6867	0.091654	0.6976	RANBP2	RAN binding protein 2
26071	-0.23609	1282.1	0.13998	-1.6866	0.091683	0.6976	RTL8A	retrotransposon Gag like 8A
155382	-0.66288	136.97	0.39316	-1.686	0.09179	0.6976	VPS37D	VPS37D subunit of ESCRT-I
119016	0.3108	665.32	0.18434	1.686	0.091796	0.6976	AGAP4	"ArfGAP with GTPase domain, ankyrin repeat and PH domain 4"
442898	5.271	4.2358	3.127	1.6856	0.091863	0.6976	MIR324	microRNA 324
8038	0.8696	115.51	0.5159	1.6856	0.091875	0.6976	ADAM12	ADAM metallopeptidase domain 12
728215	0.41591	466.81	0.2468	1.6852	0.091951	0.69762	FAM155A	family with sequence similarity 155 member A
101059938	0.33407	534.48	0.19825	1.685	0.091981	0.69762	NPIPA7	nuclear pore complex interacting protein family member A7
990	-0.78667	106.36	0.46699	-1.6845	0.092076	0.69794	CDC6	cell division cycle 6
148189	-0.34855	727.93	0.20701	-1.6837	0.092245	0.69882	LINC00662	long intergenic non-protein coding RNA 662
54497	0.21952	2097.7	0.13049	1.6824	0.092497	0.70034	HEATR5B	HEAT repeat containing 5B
55909	0.26904	878.42	0.15994	1.6821	0.092552	0.70036	BIN3	bridging integrator 3
9543	5.9651	3.2488	3.5481	1.6812	0.092724	0.70121	IGDCC3	immunoglobulin superfamily DCC subclass member 3
3305	0.94369	70.373	0.5614	1.681	0.09277	0.70121	HSPA1L	heat shock protein family A (Hsp70) member 1 like
54946	-0.19699	1863.2	0.11722	-1.6805	0.092859	0.70125	SLC41A3	solute carrier family 41 member 3
154865	2.0206	20.342	1.2024	1.6804	0.092881	0.70125	IQUB	IQ motif and ubiquitin domain containing
3838	-0.14548	3572.9	0.086599	-1.6799	0.092969	0.70132	KPNA2	karyopherin subunit alpha 2
4249	0.14286	4245.1	0.085047	1.6798	0.092994	0.70132	MGAT5	"alpha-1,6-mannosylglycoprotein 6-beta-N-acetylglucosaminyltransferase"
84439	0.63316	201.43	0.37728	1.6782	0.093307	0.70328	HHIPL1	HHIP like 1
8795	0.071743	26202	0.042769	1.6775	0.093454	0.7034	TNFRSF10B	TNF receptor superfamily member 10b
83758	3.8198	7.4715	2.2773	1.6773	0.093481	0.7034	RBP5	retinol binding protein 5
10809	-0.32644	953.36	0.19462	-1.6773	0.093482	0.7034	STARD10	StAR related lipid transfer domain containing 10
8450	0.14087	5781.8	0.084	1.677	0.093547	0.7035	CUL4B	cullin 4B
6543	1.4445	31.92	0.86153	1.6767	0.093602	0.70352	SLC8A2	solute carrier family 8 member A2
124641	-0.38025	620.82	0.22693	-1.6756	0.093817	0.70385	OVCA2	OVCA2 serine hydrolase domain containing
114327	0.30217	873.37	0.1804	1.6751	0.093924	0.70385	EFHC1	EF-hand domain containing 1
2077	-0.15496	3067.6	0.092522	-1.6749	0.09396	0.70385	ERF	ETS2 repressor factor
8703	-0.26179	1314.7	0.15631	-1.6748	0.093966	0.70385	B4GALT3	"beta-1,4-galactosyltransferase 3"
170394	-0.28704	961.64	0.1714	-1.6747	0.094001	0.70385	PWWP2B	PWWP domain containing 2B
339883	-1.0502	77.223	0.62713	-1.6746	0.09401	0.70385	C3orf35	chromosome 3 open reading frame 35
6129	-0.089594	19430	0.053502	-1.6746	0.094017	0.70385	RPL7	ribosomal protein L7
79571	-0.1898	1851.4	0.11337	-1.6741	0.094107	0.70385	GCC1	GRIP and coiled-coil domain containing 1
23051	0.30122	1457.4	0.17994	1.674	0.094121	0.70385	ZHX3	zinc fingers and homeoboxes 3
5106	-0.19605	1740	0.11714	-1.6737	0.094199	0.70404	PCK2	"phosphoenolpyruvate carboxykinase 2, mitochondrial"
10156	-0.46229	335.58	0.27637	-1.6727	0.094382	0.70416	RASA4	RAS p21 protein activator 4
23184	-0.19486	2291.4	0.1165	-1.6726	0.094401	0.70416	MESD	mesoderm development LRP chaperone
730249	5.137	4.6702	3.0731	1.6716	0.094601	0.70416	ACOD1	aconitate decarboxylase 1
55024	-4.4558	4.9143	2.6657	-1.6715	0.09462	0.70416	BANK1	B cell scaffold protein with ankyrin repeats 1
51154	-0.25019	1112.1	0.14969	-1.6714	0.094649	0.70416	MRTO4	"MRT4 homolog, ribosome maturation factor"
55379	-0.16582	5307.7	0.099221	-1.6712	0.094674	0.70416	LRRC59	leucine rich repeat containing 59
79786	0.17844	3652.2	0.1068	1.6707	0.094777	0.70416	KLHL36	kelch like family member 36
55351	-0.21253	1352.9	0.12722	-1.6706	0.094799	0.70416	STK32B	serine/threonine kinase 32B
55742	-0.13276	4980.2	0.079471	-1.6706	0.094804	0.70416	PARVA	parvin alpha
9020	-0.37195	432.61	0.22269	-1.6703	0.094862	0.70416	MAP3K14	mitogen-activated protein kinase kinase kinase 14
10206	-0.20906	1847.4	0.12518	-1.6701	0.094909	0.70416	TRIM13	tripartite motif containing 13
83744	-0.37221	447.45	0.22288	-1.67	0.094916	0.70416	ZNF484	zinc finger protein 484
57835	1.41	48.653	0.84449	1.6696	0.094991	0.70416	SLC4A5	solute carrier family 4 member 5
3897	-0.89016	74.57	0.53316	-1.6696	0.094998	0.70416	L1CAM	L1 cell adhesion molecule
105369779	0.58219	270.15	0.34874	1.6694	0.095042	0.70416	LOC105369779	uncharacterized LOC105369779
23301	0.23481	1309.5	0.14068	1.6691	0.095092	0.70416	EHBP1	EH domain binding protein 1
57561	0.19576	2040.7	0.11729	1.669	0.095127	0.70416	ARRDC3	arrestin domain containing 3
9909	0.16824	2901.4	0.10082	1.6688	0.095164	0.70416	DENND4B	DENN domain containing 4B
29959	-0.10733	6771.2	0.06434	-1.6682	0.095278	0.70462	NRBP1	nuclear receptor binding protein 1
10732	0.27876	997.97	0.16719	1.6674	0.095442	0.70506	TCFL5	transcription factor like 5
93643	0.2513	1515.2	0.15074	1.6671	0.0955	0.70506	TJAP1	tight junction associated protein 1
152217	-0.39885	452.06	0.23927	-1.667	0.095518	0.70506	NCBP2AS2	NCBP2 antisense 2 (head to head)
79924	-0.20406	1856.6	0.12242	-1.6668	0.095549	0.70506	ADM2	adrenomedullin 2
7456	-0.22451	1519.3	0.13472	-1.6664	0.095628	0.70525	WIPF1	WAS/WASL interacting protein family member 1
6782	-0.17532	3015.3	0.10524	-1.6659	0.095737	0.70563	HSPA13	heat shock protein family A (Hsp70) member 13
51118	0.22623	1314.9	0.13582	1.6656	0.095785	0.70563	UTP11	UTP11 small subunit processome component
29944	5.9408	4.1891	3.5675	1.6653	0.095861	0.7058	PNMA3	PNMA family member 3
5316	0.29602	741.65	0.17792	1.6637	0.096168	0.7067	PKNOX1	PBX/knotted 1 homeobox 1
8655	-0.15113	5302.2	0.09085	-1.6635	0.096209	0.7067	DYNLL1	dynein light chain LC8-type 1
375775	0.60319	211.18	0.36262	1.6635	0.096222	0.7067	PNPLA7	patatin like phospholipase domain containing 7
79990	-0.33488	823.53	0.20135	-1.6632	0.096278	0.7067	PLEKHH3	"pleckstrin homology, MyTH4 and FERM domain containing H3"
25834	1.8902	23.225	1.1366	1.6631	0.0963	0.7067	MGAT4C	MGAT4 family member C
221955	-0.206	1928.2	0.12391	-1.6625	0.096405	0.7067	DAGLB	diacylglycerol lipase beta
111188157	-3.4324	6.8365	2.0649	-1.6623	0.096458	0.7067	LYNX1-SLURP2	LYNX1-SLURP2 readthrough
84319	-0.45142	352.1	0.27159	-1.6621	0.096488	0.7067	CMSS1	cms1 ribosomal small subunit homolog
29914	-0.31944	739.96	0.19221	-1.6619	0.096535	0.7067	UBIAD1	UbiA prenyltransferase domain containing 1
51255	-0.20451	1651.8	0.12306	-1.6619	0.096538	0.7067	RNF181	ring finger protein 181
57501	-2.6748	8.3692	1.6096	-1.6617	0.096566	0.7067	KIAA1257	KIAA1257
81786	-0.3897	373.21	0.2346	-1.6611	0.096687	0.70697	TRIM7	tripartite motif containing 7
6576	-0.18881	2688	0.11367	-1.661	0.096708	0.70697	SLC25A1	solute carrier family 25 member 1
100499483	0.95386	184.71	0.57469	1.6598	0.096956	0.70808	CCDC180	coiled-coil domain containing 180
55659	-0.42979	336.11	0.25895	-1.6597	0.096966	0.70808	ZNF416	zinc finger protein 416
51313	0.11649	6335.7	0.070217	1.659	0.097113	0.70877	GASK1B	golgi associated kinase 1B
64847	0.16798	3693.4	0.10132	1.6579	0.097346	0.70976	SPATA20	spermatogenesis associated 20
4841	0.10856	11574	0.06549	1.6576	0.097393	0.70976	NONO	non-POU domain containing octamer binding
145508	-0.95476	84.311	0.57601	-1.6576	0.097408	0.70976	CEP128	centrosomal protein 128
50831	-2.3071	15.604	1.3923	-1.657	0.097519	0.71018	TAS2R3	taste 2 receptor member 3
6774	0.10878	9393.5	0.065657	1.6567	0.097572	0.71018	STAT3	signal transducer and activator of transcription 3
23120	5.3854	3.5331	3.2511	1.6565	0.097627	0.71019	ATP10B	ATPase phospholipid transporting 10B (putative)
9922	0.2133	1571.6	0.12884	1.6555	0.097818	0.71119	IQSEC1	IQ motif and Sec7 domain ArfGEF 1
3552	0.40244	411.68	0.24313	1.6552	0.097874	0.71121	IL1A	interleukin 1 alpha
80152	0.20588	2453	0.12445	1.6543	0.098061	0.71153	CENPT	centromere protein T
8330	-5.3668	2.9654	3.2442	-1.6543	0.098072	0.71153	H2AC15	H2A clustered histone 15
51108	-0.16386	4101.9	0.099063	-1.6541	0.098104	0.71153	METTL9	methyltransferase like 9
1106	0.1022	10217	0.061795	1.6539	0.09814	0.71153	CHD2	chromodomain helicase DNA binding protein 2
90102	0.12149	5365.8	0.073467	1.6537	0.098184	0.71153	PHLDB2	pleckstrin homology like domain family B member 2
285267	-0.3396	501.58	0.20542	-1.6532	0.098298	0.71188	ZNF619	zinc finger protein 619
9459	0.35299	633.45	0.21355	1.653	0.098339	0.71188	ARHGEF6	Rac/Cdc42 guanine nucleotide exchange factor 6
643401	0.60559	249.92	0.36645	1.6526	0.098418	0.71206	PURPL	p53 upregulated regulator of p53 levels
79671	-0.26911	1121.5	0.1629	-1.652	0.098533	0.71251	NLRX1	NLR family member X1
10936	-0.77485	99.447	0.46912	-1.6517	0.09859	0.71254	GPR75	G protein-coupled receptor 75
4849	-0.19795	2064.7	0.1199	-1.651	0.098742	0.71269	CNOT3	CCR4-NOT transcription complex subunit 3
1397	-0.11327	6156.8	0.068622	-1.6507	0.098806	0.71269	CRIP2	cysteine rich protein 2
54964	-0.63874	197.35	0.38711	-1.65	0.098934	0.71269	C1orf56	chromosome 1 open reading frame 56
11201	0.21029	1887	0.12745	1.6499	0.098955	0.71269	POLI	DNA polymerase iota
2318	-0.1245	14619	0.075473	-1.6495	0.099036	0.71269	FLNC	filamin C
138715	3.3419	10.475	2.0262	1.6493	0.099079	0.71269	ARID3C	AT-rich interaction domain 3C
81	-0.094683	23811	0.057415	-1.6491	0.099124	0.71269	ACTN4	actinin alpha 4
5460	0.74657	111.47	0.45273	1.649	0.09914	0.71269	POU5F1	POU class 5 homeobox 1
6876	-0.37372	651.55	0.22666	-1.6488	0.099186	0.71269	TAGLN	transgelin
6572	-4.8562	5.583	2.9454	-1.6488	0.099197	0.71269	SLC18A3	solute carrier family 18 member A3
23646	-0.10777	11591	0.065363	-1.6488	0.099198	0.71269	PLD3	phospholipase D family member 3
1287	0.18727	2498.1	0.11362	1.6482	0.099313	0.71286	COL4A5	collagen type IV alpha 5 chain
1298	1.9941	31.309	1.21	1.648	0.099344	0.71286	COL9A2	collagen type IX alpha 2 chain
284080	2.0008	24.303	1.2142	1.6479	0.099382	0.71286	PICART1	p53 inducible cancer associated RNA transcript 1
4097	-0.13119	6035.5	0.079631	-1.6474	0.099466	0.71308	MAFG	MAF bZIP transcription factor G
23065	0.13609	5010.4	0.082619	1.6472	0.099521	0.71309	EMC1	ER membrane protein complex subunit 1
590	-5.7509	3.0869	3.495	-1.6454	0.099881	0.71529	BCHE	butyrylcholinesterase
100131755	0.24605	1942	0.14961	1.6446	0.10005	0.7161	ARMCX4	armadillo repeat containing X-linked 4
7461	-0.15324	3554.1	0.093193	-1.6444	0.1001	0.7161	CLIP2	CAP-Gly domain containing linker protein 2
27351	-0.13226	4811.5	0.080454	-1.6439	0.10019	0.71638	DESI1	desumoylating isopeptidase 1
23133	0.22169	1494.5	0.13492	1.6431	0.10037	0.71726	PHF8	PHD finger protein 8
284371	0.26103	1161.3	0.15894	1.6423	0.10052	0.71787	ZNF841	zinc finger protein 841
4040	0.18899	1908.3	0.11512	1.6418	0.10063	0.71787	LRP6	LDL receptor related protein 6
3691	-0.36814	566.72	0.22433	-1.641	0.10079	0.71787	ITGB4	integrin subunit beta 4
57325	0.37881	572.57	0.23085	1.6409	0.10081	0.71787	KAT14	lysine acetyltransferase 14
7692	0.25692	917.82	0.1566	1.6407	0.10087	0.71787	ZNF133	zinc finger protein 133
1213	0.094261	25094	0.057458	1.6405	0.1009	0.71787	CLTC	clathrin heavy chain
53827	-0.13655	4169.2	0.083251	-1.6402	0.10097	0.71787	FXYD5	FXYD domain containing ion transport regulator 5
7730	2.1451	32.781	1.3079	1.6401	0.10098	0.71787	ZNF177	zinc finger protein 177
259307	-0.39834	419.88	0.2429	-1.6399	0.10102	0.71787	IL4I1	interleukin 4 induced 1
8661	0.095467	15529	0.058229	1.6395	0.10111	0.71787	EIF3A	eukaryotic translation initiation factor 3 subunit A
27115	0.19126	2203.4	0.11667	1.6393	0.10115	0.71787	PDE7B	phosphodiesterase 7B
125206	4.8375	5.121	2.9513	1.6391	0.1012	0.71787	SLC5A10	solute carrier family 5 member 10
4651	0.096923	9585.8	0.059136	1.639	0.10121	0.71787	MYO10	myosin X
10921	0.14366	4220.8	0.087653	1.6389	0.10123	0.71787	RNPS1	RNA binding protein with serine rich domain 1
9726	-0.195	2134.5	0.11901	-1.6385	0.10131	0.71787	ZNF646	zinc finger protein 646
51504	-0.1895	2067.9	0.11566	-1.6385	0.10132	0.71787	TRMT112	tRNA methyltransferase subunit 11-2
10454	-0.24334	1049.2	0.14862	-1.6373	0.10156	0.71833	TAB1	TGF-beta activated kinase 1 (MAP3K7) binding protein 1
404734	-0.18076	4383.1	0.11041	-1.6373	0.10158	0.71833	ANKHD1-EIF4EBP3	ANKHD1-EIF4EBP3 readthrough
8531	-0.10108	24564	0.061769	-1.6364	0.10176	0.71833	YBX3	Y-box binding protein 3
7056	-0.23486	1442.9	0.14355	-1.6361	0.10181	0.71833	THBD	thrombomodulin
241	3.486	11.77	2.1315	1.6355	0.10195	0.71833	ALOX5AP	arachidonate 5-lipoxygenase activating protein
730183	1.9751	25.072	1.2078	1.6353	0.10198	0.71833	LOC730183	uncharacterized LOC730183
5704	-0.1659	3260.6	0.10146	-1.6351	0.10202	0.71833	PSMC4	"proteasome 26S subunit, ATPase 4"
84759	0.51907	231.5	0.31746	1.635	0.10204	0.71833	PCGF1	polycomb group ring finger 1
402160	2.8071	9.4553	1.7168	1.635	0.10204	0.71833	CFAP99	cilia and flagella associated protein 99
54407	0.079816	34674	0.048818	1.635	0.10206	0.71833	SLC38A2	solute carrier family 38 member 2
55320	0.3325	642.34	0.20344	1.6344	0.10218	0.71833	MIS18BP1	MIS18 binding protein 1
5879	-0.10745	12634	0.065746	-1.6343	0.1022	0.71833	RAC1	Rac family small GTPase 1
219527	-5.4949	4.4888	3.3623	-1.6343	0.1022	0.71833	LRRC55	leucine rich repeat containing 55
3815	0.24922	1303.9	0.1525	1.6342	0.10222	0.71833	KIT	"KIT proto-oncogene, receptor tyrosine kinase"
408050	0.1147	5831.3	0.07019	1.6341	0.10224	0.71833	NOMO3	NODAL modulator 3
5678	2.2155	21.109	1.3558	1.6341	0.10224	0.71833	PSG9	pregnancy specific beta-1-glycoprotein 9
284361	-0.15434	4101.6	0.094474	-1.6337	0.10233	0.71855	EMC10	ER membrane protein complex subunit 10
4218	-0.20819	1989.6	0.12746	-1.6334	0.10239	0.71861	RAB8A	"RAB8A, member RAS oncogene family"
26190	0.15124	4714.3	0.092609	1.6331	0.10244	0.71861	FBXW2	F-box and WD repeat domain containing 2
387763	-0.25451	1377.1	0.1559	-1.6326	0.10256	0.71886	C11orf96	chromosome 11 open reading frame 96
79158	0.13625	3945	0.083469	1.6323	0.10261	0.71886	GNPTAB	N-acetylglucosamine-1-phosphate transferase subunits alpha and beta
79159	-0.36604	496.92	0.22435	-1.6316	0.10277	0.71886	NOL12	nucleolar protein 12
3234	-5.4252	3.7066	3.3252	-1.6315	0.10278	0.71886	HOXD8	homeobox D8
6160	-0.10997	13457	0.067414	-1.6313	0.10283	0.71886	RPL31	ribosomal protein L31
55858	0.1329	5288.8	0.081484	1.631	0.10289	0.71886	TMEM165	transmembrane protein 165
79739	0.23965	1204.9	0.14694	1.6309	0.1029	0.71886	TTLL7	tubulin tyrosine ligase like 7
1031	-1.1348	41.787	0.69589	-1.6307	0.10296	0.71886	CDKN2C	cyclin dependent kinase inhibitor 2C
23641	-0.20424	1397.9	0.12525	-1.6307	0.10296	0.71886	LDOC1	LDOC1 regulator of NFKB signaling
9764	0.35167	629.84	0.21578	1.6298	0.10315	0.71977	KIAA0513	KIAA0513
146059	0.25203	1162.6	0.15471	1.629	0.10331	0.72031	CDAN1	codanin 1
3716	0.08014	29142	0.049199	1.6289	0.10333	0.72031	JAK1	Janus kinase 1
2114	0.099061	8638.1	0.06084	1.6282	0.10348	0.72052	ETS2	"ETS proto-oncogene 2, transcription factor"
57538	0.11629	6721.4	0.071429	1.6281	0.10351	0.72052	ALPK3	alpha kinase 3
145173	0.29919	835.08	0.18378	1.628	0.10353	0.72052	B3GLCT	beta 3-glucosyltransferase
118487	0.30215	805.58	0.18571	1.627	0.10374	0.72075	CHCHD1	coiled-coil-helix-coiled-coil-helix domain containing 1
84879	-1.2166	54.618	0.74784	-1.6268	0.10377	0.72075	MFSD2A	major facilitator superfamily domain containing 2A
421	0.15591	3920	0.095841	1.6268	0.10378	0.72075	ARVCF	ARVCF delta catenin family member
64115	-0.50284	378.38	0.30915	-1.6265	0.10384	0.72075	VSIR	V-set immunoregulatory receptor
22839	-0.12381	6293.2	0.076121	-1.6265	0.10385	0.72075	DLGAP4	DLG associated protein 4
8718	0.17018	2411.7	0.10468	1.6258	0.10399	0.72075	TNFRSF25	TNF receptor superfamily member 25
2213	5.8918	3.0891	3.624	1.6258	0.104	0.72075	FCGR2B	Fc fragment of IgG receptor IIb
55771	0.46347	303.82	0.28513	1.6255	0.10405	0.72075	PRR11	proline rich 11
112939	-0.13706	6064.4	0.084339	-1.6251	0.10414	0.72075	NACC1	nucleus accumbens associated 1
4145	5.2226	5.5515	3.2139	1.625	0.10416	0.72075	MATK	megakaryocyte-associated tyrosine kinase
117166	1.5141	24.538	0.93194	1.6247	0.10422	0.72075	WFIKKN1	"WAP, follistatin/kazal, immunoglobulin, kunitz and netrin domain containing 1"
94121	0.30804	726.69	0.18961	1.6246	0.10426	0.72075	SYTL4	synaptotagmin like 4
388566	0.28526	749.88	0.1756	1.6245	0.10427	0.72075	ZNF470	zinc finger protein 470
100750246	5.3306	3.3183	3.2818	1.6243	0.10431	0.72075	HIF1A-AS1	HIF1A antisense RNA 1
7763	0.1169	7358.7	0.071985	1.6239	0.1044	0.72094	ZFAND5	zinc finger AN1-type containing 5
4633	4.8374	5.1416	2.9801	1.6232	0.10455	0.72143	MYL2	myosin light chain 2
6651	0.088836	13582	0.054734	1.6231	0.10457	0.72143	SON	SON DNA binding protein
114971	-0.22715	1192.9	0.14	-1.6225	0.1047	0.72189	PTPMT1	protein tyrosine phosphatase mitochondrial 1
285367	-0.28379	884.42	0.17498	-1.6218	0.10484	0.72249	RPUSD3	RNA pseudouridine synthase D3
79042	-0.23995	1656.1	0.14801	-1.6212	0.10498	0.72289	TSEN34	tRNA splicing endonuclease subunit 34
79631	-0.19399	2174.9	0.11968	-1.6208	0.10505	0.72289	EFL1	elongation factor like GTPase 1
1132	1.091	65.602	0.67314	1.6208	0.10506	0.72289	CHRM4	cholinergic receptor muscarinic 4
302	-0.073086	57837	0.045112	-1.6201	0.10521	0.72298	ANXA2	annexin A2
128025	5.9759	3.631	3.6888	1.62	0.10523	0.72298	WDR64	WD repeat domain 64
401505	-0.23987	1159.6	0.14812	-1.6194	0.10536	0.72298	TOMM5	translocase of outer mitochondrial membrane 5
445582	-4.4558	3.5599	2.7516	-1.6193	0.10537	0.72298	POTEE	POTE ankyrin domain family member E
84315	-0.27438	802.93	0.16949	-1.6189	0.10547	0.72298	MON1A	"MON1 homolog A, secretory trafficking associated"
84923	-0.21888	1292.8	0.13521	-1.6188	0.1055	0.72298	FAM104A	family with sequence similarity 104 member A
64374	-0.16009	2354.3	0.098913	-1.6185	0.10555	0.72298	SIL1	SIL1 nucleotide exchange factor
79074	0.26756	931.25	0.16536	1.6181	0.10564	0.72298	C2orf49	chromosome 2 open reading frame 49
84444	0.18697	2263.1	0.11555	1.618	0.10566	0.72298	DOT1L	DOT1 like histone lysine methyltransferase
1340	-0.21339	2090.7	0.1319	-1.6177	0.10572	0.72298	COX6B1	cytochrome c oxidase subunit 6B1
10591	-0.33616	733.33	0.20781	-1.6176	0.10574	0.72298	DNPH1	2'-deoxynucleoside 5'-phosphate N-hydrolase 1
9968	0.17303	2634.8	0.10699	1.6172	0.10584	0.72298	MED12	mediator complex subunit 12
10194	-0.22914	1102.2	0.1417	-1.6171	0.10586	0.72298	TSHZ1	teashirt zinc finger homeobox 1
150726	0.46056	352.24	0.2849	1.6165	0.10598	0.72298	FBXO41	F-box protein 41
23379	0.15175	2975.9	0.093882	1.6164	0.10601	0.72298	ICE1	interactor of little elongation complex ELL subunit 1
5886	-0.1813	3639.3	0.11217	-1.6163	0.10604	0.72298	RAD23A	"RAD23 homolog A, nucleotide excision repair protein"
2040	-0.076862	16214	0.047559	-1.6161	0.10606	0.72298	STOM	stomatin
54931	-0.30365	829.48	0.18789	-1.6161	0.10608	0.72298	TRMT10C	"tRNA methyltransferase 10C, mitochondrial RNase P subunit"
285521	-0.38303	490.74	0.23703	-1.616	0.1061	0.72298	COX18	cytochrome c oxidase assembly factor COX18
55930	0.27848	825.43	0.17238	1.6155	0.10621	0.72337	MYO5C	myosin VC
729540	0.18919	2168.8	0.1172	1.6143	0.10647	0.72412	RGPD6	RANBP2 like and GRIP domain containing 6
399687	0.20036	2914.9	0.12412	1.6143	0.10647	0.72412	MYO18A	myosin XVIIIA
92806	-0.33345	550.08	0.2066	-1.614	0.10652	0.72412	CENPBD1	CENPB DNA-binding domain containing 1
3297	-0.13329	5188.3	0.082584	-1.614	0.10654	0.72412	HSF1	heat shock transcription factor 1
5481	-0.25518	947.41	0.15821	-1.613	0.10675	0.72487	PPID	peptidylprolyl isomerase D
1606	0.14169	3437.2	0.087854	1.6128	0.10679	0.72487	DGKA	diacylglycerol kinase alpha
80224	-0.6721	225.35	0.41676	-1.6127	0.10681	0.72487	NUBPL	nucleotide binding protein like
728689	-0.11646	7475.5	0.072248	-1.6119	0.10698	0.72559	EIF3CL	eukaryotic translation initiation factor 3 subunit C like
51102	-0.29498	658.6	0.18303	-1.6117	0.10703	0.72559	MECR	mitochondrial trans-2-enoyl-CoA reductase
56311	-5.2206	4.1543	3.2397	-1.6115	0.10708	0.72559	ANKRD7	ankyrin repeat domain 7
51552	-0.11806	5026	0.073288	-1.6109	0.1072	0.72571	RAB14	"RAB14, member RAS oncogene family"
889	-0.22047	1500.1	0.13686	-1.6109	0.10721	0.72571	KRIT1	KRIT1 ankyrin repeat containing
11232	0.35345	636.75	0.21953	1.6101	0.10739	0.72657	POLG2	"DNA polymerase gamma 2, accessory subunit"
51056	-0.12998	5750	0.080745	-1.6097	0.10745	0.72666	LAP3	leucine aminopeptidase 3
4293	5.868	3.0378	3.6473	1.6088	0.10765	0.72729	MAP3K9	mitogen-activated protein kinase kinase kinase 9
23386	-0.12601	6257.2	0.078329	-1.6087	0.10767	0.72729	NUDCD3	NudC domain containing 3
552891	-0.56665	289.5	0.35227	-1.6085	0.10772	0.72729	DNAJC25-GNG10	DNAJC25-GNG10 readthrough
83443	-0.1798	1935.6	0.1118	-1.6083	0.10777	0.72729	SF3B5	splicing factor 3b subunit 5
148206	0.51934	253.8	0.32313	1.6072	0.108	0.72796	ZNF714	zinc finger protein 714
8774	0.20013	2105.7	0.12453	1.6071	0.10804	0.72796	NAPG	NSF attachment protein gamma
7768	0.46734	331.52	0.29084	1.6069	0.10808	0.72796	ZNF225	zinc finger protein 225
26191	0.53026	231.51	0.32999	1.6069	0.10808	0.72796	PTPN22	protein tyrosine phosphatase non-receptor type 22
89941	0.16073	3150.7	0.10009	1.6059	0.10829	0.72867	RHOT2	ras homolog family member T2
178	0.23159	1166.3	0.14423	1.6057	0.10835	0.72867	AGL	"amylo-alpha-1, 6-glucosidase, 4-alpha-glucanotransferase"
56683	0.23517	1098.9	0.14646	1.6056	0.10835	0.72867	CFAP298	cilia and flagella associated protein 298
23193	0.097279	18163	0.060651	1.6039	0.10873	0.72965	GANAB	glucosidase II alpha subunit
5142	0.21629	2111.4	0.13489	1.6035	0.10883	0.72965	PDE4B	phosphodiesterase 4B
79690	-0.43544	393.39	0.27157	-1.6034	0.10884	0.72965	GAL3ST4	galactose-3-O-sulfotransferase 4
81542	0.17973	2082	0.1121	1.6033	0.10886	0.72965	TMX1	thioredoxin related transmembrane protein 1
140606	-0.15469	3368.6	0.096486	-1.6032	0.10888	0.72965	SELENOM	selenoprotein M
92	-0.35904	456.24	0.22401	-1.6028	0.10898	0.72965	ACVR2A	activin A receptor type 2A
199223	0.3212	667.2	0.2004	1.6028	0.10898	0.72965	TTC21A	tetratricopeptide repeat domain 21A
140465	-0.2232	1913.2	0.13926	-1.6027	0.10899	0.72965	MYL6B	myosin light chain 6B
23360	0.14098	5036.1	0.08797	1.6026	0.10903	0.72965	FNBP4	formin binding protein 4
6228	-0.096539	13499	0.060244	-1.6025	0.10905	0.72965	RPS23	ribosomal protein S23
60493	-0.26408	907.62	0.16482	-1.6023	0.1091	0.72965	FASTKD5	FAST kinase domains 5
22864	0.18925	2200.7	0.11814	1.602	0.10916	0.72971	R3HDM2	R3H domain containing 2
[truncated: 11,358 more rows]

## Sheet: T2D-HAEC 2Gy vs 0Gy
Table S2. Differentially expressed genes identified in each comparison.
EntrezID	logFC	baseMean	lfcSE	stat	P.Value	adj.P.Val	Symbols	Name
4599	-0.55551	22666	0.056173	-9.8893	4.6338e-23	6.1889e-19	MX1	MX dynamin like GTPase 1
2537	-0.51265	45448	0.053652	-9.555	1.2358e-21	8.2529e-18	IFI6	interferon alpha inducible protein 6
6029	-2.1388	7335.7	0.23357	-9.1572	5.3243e-20	2.2561e-16	RN7SL1	RNA component of signal recognition particle 7SL1
378706	-2.1204	8402.1	0.23221	-9.1315	6.7567e-20	2.2561e-16	RN7SL2	RNA component of signal recognition particle 7SL2
9636	-0.77001	8946.7	0.0867	-8.8813	6.6088e-19	1.7654e-15	ISG15	ISG15 ubiquitin like modifier
4939	-0.48945	10529	0.056968	-8.5916	8.5759e-18	1.909e-14	OAS2	2'-5'-oligoadenylate synthetase 2
4061	-0.56773	7779.7	0.066822	-8.4962	1.9584e-17	3.7366e-14	LY6E	lymphocyte antigen 6 family member E
378938	-0.41638	107700	0.051533	-8.0799	6.4822e-16	1.0822e-12	MALAT1	metastasis associated lung adenocarcinoma transcript 1
5204	-0.68923	3531.2	0.091922	-7.498	6.4822e-14	9.6196e-11	PFDN5	prefoldin subunit 5
4123	0.57283	6605.3	0.078763	7.2729	3.518e-13	4.6987e-10	MAN2C1	mannosidase alpha class 2C member 1
3434	-0.54368	5176	0.075671	-7.1848	6.7312e-13	8.173e-10	IFIT1	interferon induced protein with tetratricopeptide repeats 1
378707	-2.1567	314.95	0.30663	-7.0335	2.0146e-12	2.2423e-09	RN7SL3	RNA component of signal recognition particle 7SL3
4539	-0.47128	59841	0.067987	-6.932	4.1497e-12	4.2633e-09	MT-ND4L	mitochondrially encoded NADH 4L dehydrogenase
2512	-0.35028	136970	0.051353	-6.8212	9.0307e-12	8.6153e-09	FTL	ferritin light chain
23015	0.61019	5046.5	0.08973	6.8003	1.0443e-11	9.2985e-09	GOLGA8A	golgin A8 family member A
91543	-0.7567	2099.2	0.11186	-6.7649	1.3343e-11	1.1138e-08	RSAD2	radical S-adenosyl methionine domain containing 2
125050	-2.3248	3755	0.36612	-6.3499	2.1542e-10	1.6924e-07	RN7SK	RNA component of 7SK nuclear ribonucleoprotein
2495	-0.28797	258330	0.046455	-6.1989	5.687e-10	4.2197e-07	FTH1	ferritin heavy chain 1
10410	-0.43402	17361	0.070879	-6.1233	9.1632e-10	6.4412e-07	IFITM3	interferon induced transmembrane protein 3
114823	0.36024	14952	0.059117	6.0937	1.1036e-09	7.3697e-07	LENG8	leukocyte receptor cluster member 8
81669	0.50006	9020.3	0.082329	6.0739	1.2481e-09	7.9378e-07	CCNL2	cyclin L2
9246	-0.46703	4678.5	0.077149	-6.0536	1.4164e-09	8.5986e-07	UBE2L6	ubiquitin conjugating enzyme E2 L6
182	0.46436	7140	0.079105	5.8703	4.3512e-09	2.5267e-06	JAG1	jagged canonical Notch ligand 1
55082	0.41897	6978.1	0.071537	5.8568	4.7201e-09	2.6267e-06	ARGLU1	arginine and glutamate rich 1
3429	-0.34352	45126	0.059609	-5.7628	8.2716e-09	4.419e-06	IFI27	interferon alpha inducible protein 27
4512	-0.58029	643940	0.10111	-5.7395	9.497e-09	4.8785e-06	MT-CO1	mitochondrially encoded cytochrome c oxidase I
440270	0.56797	3514.7	0.099443	5.7115	1.1197e-08	5.5387e-06	GOLGA8B	golgin A8 family member B
3430	-0.6371	2146.2	0.11171	-5.7031	1.1762e-08	5.6107e-06	IFI35	interferon induced protein 35
25939	-0.38033	8259.4	0.068165	-5.5795	2.4117e-08	1.1107e-05	SAMHD1	SAM and HD domain containing deoxynucleoside triphosphate triphosphohydrolase 1
3959	-0.54727	4661.1	0.099647	-5.4921	3.9712e-08	1.7183e-05	LGALS3BP	galectin 3 binding protein
6772	-0.35128	14833	0.063969	-5.4914	3.9882e-08	1.7183e-05	STAT1	signal transducer and activator of transcription 1
23451	0.34721	13791	0.06437	5.394	6.8917e-08	2.8764e-05	SF3B1	splicing factor 3b subunit 1
23218	0.42668	5528.2	0.079862	5.3427	9.1586e-08	3.5545e-05	NBEAL2	neurobeachin like 2
6625	0.40599	15179	0.075994	5.3424	9.1705e-08	3.5545e-05	SNRNP70	small nuclear ribonucleoprotein U1 subunit 70
3912	0.27847	42668	0.052151	5.3396	9.3147e-08	3.5545e-05	LAMB1	laminin subunit beta 1
23166	0.36407	12964	0.070377	5.1732	2.3017e-07	8.1801e-05	STAB1	stabilin 1
4513	-0.58062	151140	0.11226	-5.172	2.3165e-07	8.1801e-05	MT-CO2	mitochondrially encoded cytochrome c oxidase II
22985	0.30935	12119	0.059823	5.1711	2.3274e-07	8.1801e-05	ACIN1	apoptotic chromatin condensation inducer 1
11337	-0.31572	8932	0.061435	-5.139	2.7616e-07	9.4574e-05	GABARAP	GABA type A receptor-associated protein
3956	-0.33441	30706	0.06541	-5.1125	3.1786e-07	0.00010613	LGALS1	galectin 1
6158	-0.26189	22674	0.051756	-5.0602	4.1882e-07	0.00013553	RPL28	ribosomal protein L28
51351	0.42702	13762	0.084444	5.0569	4.262e-07	0.00013553	ZNF117	zinc finger protein 117
65123	0.36543	5161	0.072559	5.0363	4.7452e-07	0.00014739	INTS3	integrator complex subunit 3
3725	0.2781	10913	0.05554	5.0073	5.52e-07	0.00016756	JUN	"Jun proto-oncogene, AP-1 transcription factor subunit"
60314	-1.6706	314.1	0.33788	-4.9444	7.6389e-07	0.00022672	C12orf10	chromosome 12 open reading frame 10
80162	0.56308	2486.9	0.11489	4.9008	9.5425e-07	0.00027706	PGGHG	protein-glucosylgalactosylhydroxylysine glucosidase
6142	-0.29176	20266	0.059742	-4.8836	1.0416e-06	0.00029598	RPL18A	ribosomal protein L18a
10482	0.45092	4568.4	0.092851	4.8564	1.1952e-06	0.00033257	NXF1	nuclear RNA export factor 1
25862	-1.3124	798.67	0.27168	-4.8306	1.3614e-06	0.00037015	USP49	ubiquitin specific peptidase 49
2583	-8.1142	38.616	1.681	-4.827	1.3857e-06	0.00037015	B4GALNT1	"beta-1,4-N-acetyl-galactosaminyltransferase 1"
3106	-0.21028	65032	0.043701	-4.8118	1.4958e-06	0.00039173	HLA-B	"major histocompatibility complex, class I, B"
80279	0.4685	3094.1	0.098505	4.7561	1.9738e-06	0.00050646	CDK5RAP3	CDK5 regulatory subunit associated protein 3
29968	-0.36904	4405.4	0.077652	-4.7524	2.0098e-06	0.00050646	PSAT1	phosphoserine aminotransferase 1
7009	-0.22337	28798	0.047549	-4.6978	2.6297e-06	0.0006504	TMBIM6	transmembrane BAX inhibitor motif containing 6
3187	0.38408	15141	0.082198	4.6727	2.9731e-06	0.00072197	HNRNPH1	heterogeneous nuclear ribonucleoprotein H1
226	-0.25591	48403	0.054959	-4.6563	3.2189e-06	0.00076772	ALDOA	"aldolase, fructose-bisphosphate A"
51296	-0.65685	1688.3	0.14148	-4.6425	3.4415e-06	0.00080639	SLC15A3	solute carrier family 15 member 3
57704	0.43438	2867.2	0.093648	4.6384	3.5115e-06	0.00080862	GBA2	glucosylceramidase beta 2
1603	-0.35521	5250.9	0.076902	-4.6191	3.855e-06	0.00087267	DAD1	defender against cell death 1
37	0.30193	9632.4	0.065937	4.5791	4.6696e-06	0.0010334	ACADVL	acyl-CoA dehydrogenase very long chain
4514	-0.53985	173600	0.11797	-4.576	4.7404e-06	0.0010334	MT-CO3	mitochondrially encoded cytochrome c oxidase III
23162	0.34024	9086.5	0.074394	4.5735	4.7973e-06	0.0010334	MAPK8IP3	mitogen-activated protein kinase 8 interacting protein 3
22795	0.34832	11034	0.076464	4.5553	5.23e-06	0.0011088	NID2	nidogen 2
113219467	-0.38536	14677	0.08506	-4.5304	5.886e-06	0.0012283	MIR12136	microRNA 12136
351	0.17055	122680	0.037978	4.4908	7.0956e-06	0.001458	APP	amyloid beta precursor protein
1499	0.22628	16340	0.050445	4.4856	7.2703e-06	0.0014712	CTNNB1	catenin beta 1
5359	-0.33535	5030.4	0.074934	-4.4754	7.6286e-06	0.001504	PLSCR1	phospholipid scramblase 1
4508	-0.49448	198490	0.11051	-4.4745	7.6575e-06	0.001504	MT-ATP6	mitochondrially encoded ATP synthase 6
26118	0.32633	23712	0.074128	4.4023	1.0712e-05	0.0020568	WSB1	WD repeat and SOCS box containing 1
2014	-0.50518	2933.9	0.11479	-4.4009	1.078e-05	0.0020568	EMP3	epithelial membrane protein 3
10964	-0.25076	16473	0.057097	-4.3919	1.1238e-05	0.002114	IFI44L	interferon induced protein 44 like
6209	-0.28607	12186	0.065249	-4.3842	1.1641e-05	0.0021595	RPS15	ribosomal protein S15
26140	0.42375	3461.8	0.097395	4.3508	1.3566e-05	0.0024821	TTLL3	tubulin tyrosine ligase like 3
3791	0.17431	34533	0.040346	4.3204	1.5572e-05	0.0028105	KDR	kinase insert domain receptor
85301	0.32502	5849.6	0.075288	4.3171	1.5811e-05	0.0028156	COL27A1	collagen type XXVII alpha 1 chain
3384	-0.28759	10785	0.067319	-4.2721	1.9368e-05	0.0034037	ICAM2	intercellular adhesion molecule 2
6558	0.30058	15369	0.070471	4.2653	1.9962e-05	0.0034626	SLC12A2	solute carrier family 12 member 2
3320	-0.20317	30802	0.047997	-4.2329	2.3069e-05	0.0039501	HSP90AA1	heat shock protein 90 alpha family class A member 1
129607	-0.64013	1215.8	0.15156	-4.2235	2.4052e-05	0.004016	CMPK2	cytidine/uridine monophosphate kinase 2
283131	-0.95049	124420	0.22505	-4.2235	2.4055e-05	0.004016	NEAT1	nuclear paraspeckle assembly transcript 1
6687	0.25063	10559	0.059423	4.2176	2.4689e-05	0.0040709	SPG7	"SPG7 matrix AAA peptidase subunit, paraplegin"
9542	-7.6246	22.764	1.8171	-4.196	2.7173e-05	0.0044258	NRG2	neuregulin 2
64399	0.19197	33251	0.045915	4.1809	2.9039e-05	0.0046276	HHIP	hedgehog interacting protein
9962	0.45849	2102.6	0.10972	4.1787	2.9323e-05	0.0046276	SLC23A2	solute carrier family 23 member 2
8515	0.27782	8265.8	0.066501	4.1777	2.9451e-05	0.0046276	ITGA10	integrin subunit alpha 10
5610	-0.24692	11084	0.0593	-4.1638	3.1293e-05	0.0048599	EIF2AK2	eukaryotic translation initiation factor 2 alpha kinase 2
6711	0.22348	39682	0.053741	4.1585	3.2036e-05	0.0048646	SPTBN1	"spectrin beta, non-erythrocytic 1"
89932	0.3078	6780.3	0.07402	4.1584	3.2052e-05	0.0048646	PAPLN	"papilin, proteoglycan like sulfated glycoprotein"
6520	-0.21264	18261	0.051385	-4.1382	3.5009e-05	0.0052538	SLC3A2	solute carrier family 3 member 2
967	-0.24379	47580	0.058992	-4.1326	3.5871e-05	0.0052619	CD63	CD63 molecule
3665	-0.49294	2942	0.11929	-4.1324	3.5897e-05	0.0052619	IRF7	interferon regulatory factor 7
7167	-0.24082	20544	0.058308	-4.1302	3.6245e-05	0.0052619	TPI1	triosephosphate isomerase 1
4536	-0.52827	105650	0.12798	-4.1276	3.6656e-05	0.0052643	MT-ND2	mitochondrially encoded NADH dehydrogenase 2
4519	-0.54453	167950	0.13222	-4.1185	3.8139e-05	0.0053627	MT-CYB	mitochondrially encoded cytochrome b
1636	0.43975	2106.8	0.10678	4.1184	3.8144e-05	0.0053627	ACE	angiotensin I converting enzyme
1282	0.18889	57987	0.045932	4.1124	3.9155e-05	0.0054293	COL4A1	collagen type IV alpha 1 chain
7453	-0.20031	21005	0.048728	-4.1108	3.9431e-05	0.0054293	WARS1	tryptophanyl-tRNA synthetase 1
10521	0.24052	26691	0.058774	4.0923	4.2709e-05	0.0058206	DDX17	DEAD-box helicase 17
123096	0.28575	7773.4	0.069905	4.0878	4.3552e-05	0.0058393	SLC25A29	solute carrier family 25 member 29
54809	-0.29945	6094.6	0.07327	-4.0869	4.3721e-05	0.0058393	SAMD9	sterile alpha motif domain containing 9
4179	0.30474	10064	0.074798	4.0741	4.6184e-05	0.0061072	CD46	CD46 molecule
11007	-0.36191	4977.3	0.089031	-4.0649	4.8043e-05	0.006252	CCDC85B	coiled-coil domain containing 85B
85378	0.33753	3979.2	0.083096	4.0619	4.8672e-05	0.006252	TUBGCP6	tubulin gamma complex associated protein 6
6193	-0.24587	14462	0.060532	-4.0619	4.8683e-05	0.006252	RPS5	ribosomal protein S5
4535	-0.51471	133180	0.12716	-4.0476	5.1744e-05	0.0065818	MT-ND1	mitochondrially encoded NADH dehydrogenase 1
339541	7.3601	19.778	1.8212	4.0414	5.3126e-05	0.0066939	ARMH1	armadillo like helical domain containing 1
284058	-0.34674	4546.8	0.086035	-4.0302	5.5722e-05	0.0069153	KANSL1	KAT8 regulatory NSL complex subunit 1
135	2.1008	1081.6	0.52146	4.0286	5.6104e-05	0.0069153	ADORA2A	adenosine A2a receptor
57758	-7.3637	18.462	1.8285	-4.0272	5.6437e-05	0.0069153	SCUBE2	"signal peptide, CUB domain and EGF like domain containing 2"
1305	0.25356	7073.3	0.063118	4.0172	5.8902e-05	0.0071209	COL13A1	collagen type XIII alpha 1 chain
6894	0.58023	1720.4	0.14448	4.0161	5.9181e-05	0.0071209	TARBP1	TAR (HIV-1) RNA binding protein 1
7314	-0.1937	18034	0.048278	-4.0122	6.0151e-05	0.007173	UBB	ubiquitin B
2802	0.25924	10887	0.065078	3.9836	6.7878e-05	0.0080228	GOLGA3	golgin A3
80830	-0.43284	2264	0.10947	-3.9539	7.689e-05	0.0090083	APOL6	apolipoprotein L6
7059	0.54101	1410.9	0.13695	3.9505	7.7995e-05	0.0090583	THBS3	thrombospondin 3
51005	0.39181	3010.8	0.099388	3.9422	8.0743e-05	0.0092966	AMDHD2	amidohydrolase domain containing 2
54540	0.40129	2451.7	0.102	3.9343	8.3439e-05	0.0094973	FAM193B	family with sequence similarity 193 member B
633	-0.32205	5007	0.081885	-3.933	8.3909e-05	0.0094973	BGN	biglycan
196883	0.39352	2740.2	0.10013	3.9303	8.4849e-05	0.009523	ADCY4	adenylate cyclase 4
1903	-0.48714	1504.6	0.12404	-3.9272	8.595e-05	0.0095663	S1PR3	sphingosine-1-phosphate receptor 3
10181	0.30954	8387.3	0.079047	3.9159	9.0062e-05	0.00988	RBM5	RNA binding motif protein 5
9124	-0.28416	5571.1	0.072597	-3.9142	9.0705e-05	0.00988	PDLIM1	PDZ and LIM domain 1
84129	0.65408	1473.3	0.16714	3.9134	9.0988e-05	0.00988	ACAD11	acyl-CoA dehydrogenase family member 11
64332	0.34987	3617.7	0.089512	3.9087	9.2809e-05	0.0099197	NFKBIZ	NFKB inhibitor zeta
5797	0.29308	7624.9	0.074985	3.9086	9.284e-05	0.0099197	PTPRM	protein tyrosine phosphatase receptor type M
4537	-0.63832	38181	0.16344	-3.9055	9.4039e-05	0.0099681	MT-ND3	mitochondrially encoded NADH dehydrogenase 3
201163	0.27279	7096.5	0.069922	3.9014	9.564e-05	0.010058	FLCN	folliculin
149478	0.38149	3256.4	0.097945	3.895	9.8206e-05	0.010247	BTBD19	BTB domain containing 19
51433	0.27128	5455.4	0.069788	3.8872	0.00010139	0.010498	ANAPC5	anaphase promoting complex subunit 5
7127	0.30595	4698.8	0.078787	3.8833	0.00010305	0.010587	TNFAIP2	TNF alpha induced protein 2
9013	0.41229	3307.8	0.10629	3.8789	0.00010491	0.010696	TAF1C	"TATA-box binding protein associated factor, RNA polymerase I subunit C"
85441	-0.26661	13894	0.068927	-3.868	0.00010974	0.011103	HELZ2	helicase with zinc finger 2
90990	0.51711	2300.7	0.13383	3.8638	0.00011163	0.011169	KIFC2	kinesin family member C2
23334	0.31376	5309.1	0.081223	3.8629	0.00011206	0.011169	SZT2	SZT2 subunit of KICSTOR complex
682	-0.22146	28644	0.05738	-3.8595	0.00011362	0.011241	BSG	basigin (Ok blood group)
23524	0.19067	26647	0.049592	3.8447	0.00012069	0.011852	SRRM2	serine/arginine repetitive matrix 2
6923	-0.35102	3202.1	0.091452	-3.8383	0.0001239	0.012079	ELOB	elongin B
10695	-0.40913	2160.6	0.10678	-3.8315	0.00012736	0.012326	CNPY3	canopy FGF signaling regulator 3
977	-0.21744	19136	0.056924	-3.8198	0.00013356	0.012833	CD151	CD151 molecule (Raph blood group)
7297	0.36383	4436.9	0.095634	3.8044	0.00014217	0.013563	TYK2	tyrosine kinase 2
84245	0.50365	1846.1	0.1325	3.8013	0.00014396	0.013611	MRI1	methylthioribose-1-phosphate isomerase 1
10984	-0.8912	538.91	0.23462	-3.7984	0.00014561	0.013611	KCNQ1OT1	KCNQ1 opposite strand/antisense transcript 1
153830	0.49412	3094.9	0.13009	3.7982	0.00014574	0.013611	RNF145	ring finger protein 145
23521	-0.16787	50572	0.044273	-3.7916	0.00014965	0.013804	RPL13A	ribosomal protein L13a
197335	0.60838	1354.6	0.16047	3.7913	0.00014986	0.013804	WDR90	WD repeat domain 90
56971	0.56378	1010.3	0.14892	3.7857	0.00015327	0.014021	CEACAM19	CEA cell adhesion molecule 19
50809	0.26008	7586.3	0.068818	3.7792	0.00015735	0.014296	HP1BP3	heterochromatin protein 1 binding protein 3
79661	0.50637	1294.4	0.13435	3.7691	0.00016381	0.014742	NEIL1	nei like DNA glycosylase 1
54187	-0.45392	1664.6	0.12046	-3.7681	0.00016446	0.014742	NANS	N-acetylneuraminate synthase
1471	-0.27078	8432.8	0.07248	-3.7359	0.00018702	0.016601	CST3	cystatin C
94240	-0.52268	1559.8	0.13994	-3.735	0.00018768	0.016601	EPSTI1	epithelial stromal interaction 1
9975	0.5074	1419.8	0.13614	3.7271	0.00019372	0.017022	NR1D2	nuclear receptor subfamily 1 group D member 2
3714	0.35507	4865.9	0.095383	3.7226	0.00019717	0.017212	JAG2	jagged canonical Notch ligand 2
9295	0.27139	8905.9	0.073318	3.7016	0.00021425	0.018582	SRSF11	serine and arginine rich splicing factor 11
51280	-0.25493	5986.4	0.06906	-3.6915	0.00022294	0.01921	GOLM1	golgi membrane protein 1
100653515	-1.3512	259.08	0.36633	-3.6885	0.00022561	0.019315	CEP295NL	CEP295 N-terminal like
8534	0.31227	5692.1	0.084862	3.6797	0.00023347	0.019861	CHST1	carbohydrate sulfotransferase 1
92949	0.49183	1645.4	0.13375	3.6774	0.00023567	0.019891	ADAMTSL1	ADAMTS like 1
9538	-0.31575	4877.9	0.085891	-3.6761	0.00023679	0.019891	EI24	EI24 autophagy associated transmembrane protein
390	-0.24737	6089.1	0.067477	-3.666	0.00024642	0.02057	RND3	Rho family GTPase 3
56904	0.32452	3498.9	0.088579	3.6637	0.00024863	0.020625	SH3GLB2	"SH3 domain containing GRB2 like, endophilin B2"
27183	-0.28598	5166.5	0.078137	-3.66	0.0002522	0.020793	VPS4A	vacuolar protein sorting 4 homolog A
64772	0.39699	2075.5	0.10855	3.6571	0.00025506	0.0209	ENGASE	endo-beta-N-acetylglucosaminidase
83666	-0.25519	6643.9	0.06982	-3.6549	0.00025727	0.020952	PARP9	poly(ADP-ribose) polymerase family member 9
4637	-0.173	40946	0.047368	-3.6522	0.00025998	0.021044	MYL6	myosin light chain 6
81890	0.57313	1104.1	0.15756	3.6375	0.00027528	0.022149	QTRT1	queuine tRNA-ribosyltransferase catalytic subunit 1
6601	0.3968	5059.1	0.10915	3.6353	0.00027764	0.022205	SMARCC2	"SWI/SNF related, matrix associated, actin dependent regulator of chromatin subfamily c member 2"
57189	0.32916	4102.3	0.090932	3.6198	0.00029482	0.023438	DENND11	DENN domain containing 11
29894	0.25937	6037.7	0.071775	3.6136	0.00030192	0.023742	CPSF1	cleavage and polyadenylation specific factor 1
84456	0.38004	2642.7	0.10519	3.6128	0.00030286	0.023742	L3MBTL3	L3MBTL histone methyl-lysine binding protein 3
3915	0.17408	30617	0.048232	3.6093	0.00030705	0.023742	LAMC1	laminin subunit gamma 1
567	-0.18879	79385	0.052311	-3.6091	0.00030729	0.023742	B2M	beta-2-microglobulin
23348	0.19903	12168	0.05515	3.6089	0.00030753	0.023742	DOCK9	dedicator of cytokinesis 9
5714	-0.27969	5430.8	0.077875	-3.5915	0.00032872	0.025232	PSMD8	"proteasome 26S subunit, non-ATPase 8"
64599	0.28358	6255	0.079001	3.5896	0.00033121	0.025278	GIGYF1	GRB10 interacting GYF protein 1
10959	-0.22526	8227.4	0.062944	-3.5788	0.00034515	0.026192	TMED2	transmembrane p24 trafficking protein 2
56882	0.29332	3890.4	0.082084	3.5734	0.00035234	0.026587	CDC42SE1	CDC42 small effector 1
6137	-0.23302	26942	0.065454	-3.5601	0.00037077	0.02782	RPL13	ribosomal protein L13
57761	-0.27186	5763.3	0.076415	-3.5577	0.00037407	0.027911	TRIB3	tribbles pseudokinase 3
1192	-0.25856	10757	0.072704	-3.5563	0.00037618	0.027913	CLIC1	chloride intracellular channel 1
23129	0.1729	44823	0.048675	3.5521	0.00038215	0.028199	PLXND1	plexin D1
2617	-0.18438	14137	0.051962	-3.5483	0.00038768	0.02845	GARS1	glycyl-tRNA synthetase 1
27148	0.3937	1934.5	0.11118	3.5412	0.0003983	0.029069	STK36	serine/threonine kinase 36
6469	6.7926	16.121	1.9212	3.5356	0.00040692	0.029537	SHH	sonic hedgehog signaling molecule
6222	-0.20899	29012	0.059188	-3.5309	0.00041417	0.029901	RPS18	ribosomal protein S18
93663	0.26126	4801.9	0.074157	3.5231	0.00042655	0.030393	ARHGAP18	Rho GTPase activating protein 18
7531	-0.17489	17863	0.049651	-3.5224	0.00042774	0.030393	YWHAE	tyrosine 3-monooxygenase/tryptophan 5-monooxygenase activation protein epsilon
23139	0.32119	3874.1	0.091189	3.5223	0.00042781	0.030393	MAST2	microtubule associated serine/threonine kinase 2
65981	0.36016	2441.9	0.1023	3.5207	0.00043042	0.030416	CAPRIN2	caprin family member 2
8786	0.5159	1770	0.14741	3.4997	0.00046578	0.032581	RGS11	regulator of G protein signaling 11
463	-0.355	3900.7	0.10144	-3.4996	0.00046593	0.032581	ZFHX3	zinc finger homeobox 3
89849	0.37411	3038.9	0.10699	3.4967	0.00047101	0.032764	ATG16L2	autophagy related 16 like 2
7384	-0.28717	4149.5	0.082304	-3.4892	0.00048454	0.033531	UQCRC1	ubiquinol-cytochrome c reductase core protein 1
64285	0.28922	5594.6	0.083116	3.4797	0.00050195	0.034557	RHBDF1	rhomboid 5 homolog 1
25824	-0.26621	8459.2	0.076538	-3.4781	0.00050489	0.034581	PRDX5	peroxiredoxin 5
10957	-0.27364	3872.3	0.078822	-3.4717	0.00051726	0.035248	PNRC1	proline rich nuclear receptor coactivator 1
22913	-0.28565	5597.4	0.082531	-3.4612	0.00053783	0.036463	RALY	RALY heterogeneous nuclear ribonucleoprotein
7417	-0.25623	4942.9	0.074149	-3.4556	0.00054916	0.037043	VDAC2	voltage dependent anion channel 2
440345	0.26973	4686.2	0.078388	3.4409	0.00057978	0.038636	NPIPB4	nuclear pore complex interacting protein family member B4
1327	-0.22351	9170.6	0.064956	-3.4409	0.00057978	0.038636	COX4I1	cytochrome c oxidase subunit 4I1
64771	-0.27006	3864.6	0.078503	-3.4401	0.00058145	0.038636	ILRUN	inflammation and lipid regulator with UBA-like and NBR1-like domains
7082	0.25013	6363.7	0.072801	3.4358	0.00059088	0.039069	TJP1	tight junction protein 1
65975	6.4868	15.734	1.8903	3.4316	0.00060009	0.039407	STK33	serine/threonine kinase 33
6035	-0.21892	10504	0.06382	-3.4303	0.00060281	0.039407	RNASE1	"ribonuclease A family member 1, pancreatic"
221662	1.0489	240.54	0.30586	3.4294	0.00060486	0.039407	RBM24	RNA binding motif protein 24
2259	6.6499	12.036	1.9449	3.4192	0.00062807	0.040721	FGF14	fibroblast growth factor 14
5270	-0.24082	7555.3	0.070569	-3.4125	0.00064379	0.041539	SERPINE2	serpin family E member 2
7316	-0.14496	64971	0.042563	-3.4057	0.00065998	0.042304	UBC	ubiquitin C
1969	0.22091	12504	0.064882	3.4049	0.00066199	0.042304	EPHA2	EPH receptor A2
3315	-0.19118	21937	0.056187	-3.4026	0.00066742	0.042448	HSPB1	heat shock protein family B (small) member 1
116983	0.33097	3463.6	0.097378	3.3989	0.00067663	0.04283	ACAP3	"ArfGAP with coiled-coil, ankyrin repeat and PH domains 3"
10567	-0.33273	4348.1	0.098222	-3.3875	0.00070531	0.044263	RABAC1	Rab acceptor 1
8764	0.26128	5785.8	0.077135	3.3873	0.0007059	0.044263	TNFRSF14	TNF receptor superfamily member 14
388115	0.2822	4791.9	0.083683	3.3723	0.00074551	0.046528	CCDC9B	coiled-coil domain containing 9B
11173	0.27948	8781	0.083012	3.3667	0.00076076	0.047259	ADAMTS7	ADAM metallopeptidase with thrombospondin type 1 motif 7
11328	0.25012	6701.8	0.074475	3.3584	0.00078396	0.048475	FKBP9	FKBP prolyl isomerase 9
968	-0.38337	1867.9	0.11429	-3.3543	0.00079575	0.048977	CD68	CD68 molecule
2879	-0.2434	10908	0.072597	-3.3528	0.00079991	0.049008	GPX4	glutathione peroxidase 4
1003	0.14433	68638	0.043083	3.3501	0.0008077	0.049195	CDH5	cadherin 5
26268	0.49581	1482.5	0.14804	3.3492	0.00081034	0.049195	FBXO9	F-box protein 9
728841	0.38938	1989.2	0.11655	3.3409	0.00083498	0.050462	NBPF8	NBPF member 8
442524	6.1807	16.06	1.8516	3.338	0.00084392	0.050772	DPY19L2P3	DPY19L2 pseudogene 3
9905	0.35389	3876.3	0.10641	3.3257	0.00088205	0.052828	SGSM2	small G protein signaling modulator 2
8844	0.37778	3067.5	0.11371	3.3223	0.00089274	0.05323	KSR1	kinase suppressor of ras 1
9987	0.24335	7520.1	0.073503	3.3108	0.00093031	0.05519	HNRNPDL	heterogeneous nuclear ribonucleoprotein D like
79709	0.18698	12704	0.056501	3.3094	0.00093505	0.05519	COLGALT1	collagen beta(1-O)galactosyltransferase 1
8473	0.26593	12797	0.080396	3.3077	0.00094057	0.05519	OGT	O-linked N-acetylglucosamine (GlcNAc) transferase
65992	-0.3331	3591.9	0.10072	-3.3072	0.00094223	0.05519	DDRGK1	DDRGK domain containing 1
7284	-0.27015	6148.1	0.081715	-3.306	0.00094628	0.05519	TUFM	"Tu translation elongation factor, mitochondrial"
23181	0.24983	4976.1	0.075598	3.3048	0.00095052	0.055196	DIP2A	disco interacting protein 2 homolog A
285513	1.4798	136.75	0.44949	3.2922	0.0009941	0.057477	GPRIN3	GPRIN family member 3
9518	-0.15363	25457	0.046734	-3.2874	0.0010112	0.058211	GDF15	growth differentiation factor 15
6159	-0.20512	21492	0.06246	-3.284	0.0010236	0.058674	RPL29	ribosomal protein L29
150368	0.51176	889	0.15596	3.2813	0.0010332	0.058973	PHETA2	PH domain containing endocytic trafficking adaptor 2
64135	-0.2661	4483.9	0.081351	-3.271	0.0010717	0.060704	IFIH1	interferon induced with helicase C domain 1
11274	-0.40967	1469.3	0.12525	-3.2707	0.0010726	0.060704	USP18	ubiquitin specific peptidase 18
10549	-0.31739	3904.4	0.097078	-3.2694	0.0010777	0.060733	PRDX4	peroxiredoxin 4
10493	-0.21686	34772	0.066529	-3.2597	0.0011153	0.06259	VAT1	vesicle amine transport 1
5479	-0.19976	10227	0.061331	-3.2571	0.0011255	0.062895	PPIB	peptidylprolyl isomerase B
27063	0.16305	37697	0.050093	3.255	0.001134	0.063105	ANKRD1	ankyrin repeat domain 1
4714	-0.31328	2760	0.096709	-3.2394	0.0011978	0.066379	NDUFB8	NADH:ubiquinone oxidoreductase subunit B8
89848	0.3634	2691.6	0.1124	3.2331	0.0012244	0.067575	FCHSD1	FCH and double SH3 domains 1
4485	0.9838	309.97	0.30441	3.2318	0.0012299	0.0676	MST1	macrophage stimulating 1
667	0.17054	26080	0.052906	3.2234	0.0012669	0.06935	DST	dystonin
4733	-0.37898	1960.1	0.11788	-3.2149	0.0013051	0.071145	DRG1	developmentally regulated GTP binding protein 1
23195	0.28418	3318.1	0.088442	3.2131	0.001313	0.071289	MDN1	midasin AAA ATPase 1
221395	0.14487	19761	0.045168	3.2073	0.0013398	0.072234	ADGRF5	adhesion G protein-coupled receptor F5
10488	-0.34259	2641.8	0.10683	-3.207	0.0013413	0.072234	CREB3	cAMP responsive element binding protein 3
1953	0.32313	4253.2	0.10083	3.2046	0.0013524	0.072539	MEGF6	multiple EGF like domains 6
57018	0.29442	5195.9	0.091925	3.2028	0.0013608	0.072699	CCNL1	cyclin L1
55075	0.24473	6431	0.076521	3.1982	0.001383	0.073593	UACA	uveal autoantigen with coiled-coil domains and ankyrin repeats
51593	0.27731	4307.8	0.086753	3.1965	0.0013909	0.073719	SRRT	"serrate, RNA effector molecule"
8110	0.66591	782.14	0.20859	3.1924	0.0014109	0.074484	DPF3	double PHD fingers 3
54542	0.25904	5198.6	0.081279	3.1871	0.0014372	0.075571	RC3H2	ring finger and CCCH-type domains 2
29085	-0.32915	3098.4	0.10333	-3.1855	0.001445	0.075571	PHPT1	phosphohistidine phosphatase 1
440	-0.3718	3468.7	0.11674	-3.1848	0.0014485	0.075571	ASNS	asparagine synthetase (glutamine-hydrolyzing)
5430	0.2432	9354.4	0.076653	3.1728	0.0015099	0.078215	POLR2A	RNA polymerase II subunit A
7155	0.22542	4966.5	0.071051	3.1726	0.0015109	0.078215	TOP2B	DNA topoisomerase II beta
83638	-0.38482	2437.1	0.12145	-3.1686	0.0015319	0.078869	C11orf68	chromosome 11 open reading frame 68
60481	0.41222	3426	0.13012	3.1679	0.0015353	0.078869	ELOVL5	ELOVL fatty acid elongase 5
92170	0.38373	1849.2	0.12133	3.1628	0.0015627	0.079969	MTG1	mitochondrial ribosome associated GTPase 1
6778	0.19075	9917.7	0.060345	3.1609	0.0015726	0.080167	STAT6	signal transducer and activator of transcription 6
9123	-0.2452	11164	0.077641	-3.1582	0.0015877	0.080627	SLC16A3	solute carrier family 16 member 3
[truncated: 13,093 more rows]

## Sheet: HAEC 0.1Gy vs 0Gy
Table S2. Differentially expressed genes identified in each comparison.
[truncated: 7,903 more rows]

[truncated: 6 more sheets: HAEC 0.5Gy vs 0Gy, HAEC 2Gy vs 0Gy, T2D-HAEC 0Gy vs HAEC 0Gy, T2D-HAEC 0.1Gy vs HAEC 0.1Gy, T2D-HAEC 0.5Gy vs HAEC 0.5Gy, T2D-HAEC 2Gy vs HAEC 2Gy]
