# Supplementary material
Source: MDPI journal article supplement (https://www.mdpi.com/2306-5729/8/5/92)
Supplement: s1 [file s1 › Table_S3.xlsx]

## Sheet: T2D-HAEC 0.1Gy vs 0Gy
Table S3. Gene sets associated with each comparison
Pathway	NES	NOM p-val	FDR q-val
HALLMARK_INTERFERON_ALPHA_RESPONSE	-4.8468	0	0
HALLMARK_INTERFERON_GAMMA_RESPONSE	-4.57961	0	0
HALLMARK_TNFA_SIGNALING_VIA_NFKB	-3.53791	0	0
HALLMARK_INFLAMMATORY_RESPONSE	-3.02126	0	0
HALLMARK_MTORC1_SIGNALING	-2.70102	0	0
HALLMARK_OXIDATIVE_PHOSPHORYLATION	-2.48092	0	0.000464286
HALLMARK_UV_RESPONSE_UP	-2.31252	0	0.00408383
HALLMARK_UNFOLDED_PROTEIN_RESPONSE	-2.15411	0.00408163	0.010652
HALLMARK_REACTIVE_OXYGEN_SPECIES_PATHWAY	-2.08712	0.00584795	0.0134508
HALLMARK_GLYCOLYSIS	-2.03917	0.00195695	0.0151038
HALLMARK_IL2_STAT5_SIGNALING	-2.01769	0.004	0.0145589
HALLMARK_ALLOGRAFT_REJECTION	-1.99605	0.00596422	0.0154541
HALLMARK_EPITHELIAL_MESENCHYMAL_TRANSITION	-1.95134	0.00543478	0.0190302
HALLMARK_MYC_TARGETS_V1	-1.93441	0.0140562	0.0191972
HALLMARK_KRAS_SIGNALING_DN	-1.85733	0.0164948	0.0279015
HALLMARK_HYPOXIA	-1.74399	0.0311203	0.0493022
HALLMARK_APOPTOSIS	-1.72306	0.0208768	0.0517863
HALLMARK_CHOLESTEROL_HOMEOSTASIS	-1.69221	0.0271399	0.0567171
HALLMARK_MYC_TARGETS_V2	-1.62435	0.0423077	0.0748569
HALLMARK_DNA_REPAIR	-1.47354	0.0750988	0.140291
HALLMARK_PI3K_AKT_MTOR_SIGNALING	-1.45899	0.0605469	0.142043
HALLMARK_KRAS_SIGNALING_UP	-1.36358	0.122661	0.202387
HALLMARK_IL6_JAK_STAT3_SIGNALING	-1.35851	0.112224	0.196725
HALLMARK_ESTROGEN_RESPONSE_EARLY	-1.31581	0.158954	0.224112
HALLMARK_ADIPOGENESIS	-1.21975	0.22093	0.30866
HALLMARK_ESTROGEN_RESPONSE_LATE	-1.21707	0.209446	0.299958
HALLMARK_COMPLEMENT	-1.21126	0.230769	0.295139
HALLMARK_APICAL_JUNCTION	-1.21061	0.22334	0.285323
HALLMARK_COAGULATION	-1.19323	0.226721	0.292944
HALLMARK_FATTY_ACID_METABOLISM	-1.0239	0.414587	0.488323
HALLMARK_MYOGENESIS	-1.00577	0.434156	0.499154
HALLMARK_WNT_BETA_CATENIN_SIGNALING	-0.897125	0.572597	0.645665
HALLMARK_ANDROGEN_RESPONSE	-0.882733	0.573674	0.648563
HALLMARK_XENOBIOTIC_METABOLISM	-0.832745	0.673828	0.709464
HALLMARK_PEROXISOME	-0.816995	0.671845	0.714715
HALLMARK_E2F_TARGETS	-0.79525	0.753012	0.724365
HALLMARK_MITOTIC_SPINDLE	1.72552	0.0309278	0.306173
HALLMARK_SPERMATOGENESIS	1.56091	0.0584795	0.338242
HALLMARK_ANGIOGENESIS	1.38042	0.128459	0.500902
HALLMARK_P53_PATHWAY	1.22216	0.205534	0.699718
HALLMARK_UV_RESPONSE_DN	0.956241	0.497899	1
HALLMARK_APICAL_SURFACE	0.947396	0.494297	1
HALLMARK_HEME_METABOLISM	0.924472	0.550495	0.997833
HALLMARK_TGF_BETA_SIGNALING	0.921528	0.534413	0.879833
HALLMARK_G2M_CHECKPOINT	0.873347	0.57529	0.885851
HALLMARK_NOTCH_SIGNALING	0.863711	0.604607	0.814229
HALLMARK_BILE_ACID_METABOLISM	0.849006	0.685437	0.76575
HALLMARK_PROTEIN_SECRETION	0.827234	0.686747	0.734056
HALLMARK_HEDGEHOG_SIGNALING	0.584075	0.974052	0.95286

## Sheet: T2D-HAEC 0.5Gy vs 0Gy
Table S3. Gene sets associated with each comparison
Pathway	NES	NOM p-val	FDR q-val
HALLMARK_INTERFERON_ALPHA_RESPONSE	-4.41433	0	0
HALLMARK_OXIDATIVE_PHOSPHORYLATION	-4.38542	0	0
HALLMARK_MYC_TARGETS_V1	-3.51108	0	0
HALLMARK_INTERFERON_GAMMA_RESPONSE	-2.86685	0	0
HALLMARK_ADIPOGENESIS	-2.57382	0	0.0017491
HALLMARK_MTORC1_SIGNALING	-2.24467	0.00387597	0.00492005
HALLMARK_REACTIVE_OXYGEN_SPECIES_PATHWAY	-2.00869	0.00199203	0.019768
HALLMARK_MYC_TARGETS_V2	-1.85558	0.01	0.0416629
HALLMARK_UV_RESPONSE_UP	-1.80448	0.0218688	0.0490474
HALLMARK_FATTY_ACID_METABOLISM	-1.75732	0.0216963	0.0559639
HALLMARK_UNFOLDED_PROTEIN_RESPONSE	-1.65257	0.0265306	0.0835053
HALLMARK_PI3K_AKT_MTOR_SIGNALING	-1.61819	0.0476191	0.0919314
HALLMARK_DNA_REPAIR	-1.57063	0.037037	0.105869
HALLMARK_XENOBIOTIC_METABOLISM	-1.56075	0.0557692	0.102926
HALLMARK_CHOLESTEROL_HOMEOSTASIS	-1.53268	0.0330578	0.109334
HALLMARK_PEROXISOME	-1.45999	0.0936255	0.139373
HALLMARK_HEME_METABOLISM	-1.32248	0.151052	0.231283
HALLMARK_APOPTOSIS	-1.25676	0.195266	0.280358
HALLMARK_P53_PATHWAY	-1.25502	0.166008	0.267635
HALLMARK_GLYCOLYSIS	-1.0605	0.389691	0.497044
HALLMARK_TNFA_SIGNALING_VIA_NFKB	-1.03287	0.407787	0.512167
HALLMARK_KRAS_SIGNALING_DN	-1.00229	0.421782	0.535723
HALLMARK_INFLAMMATORY_RESPONSE	-0.926187	0.518591	0.631042
HALLMARK_E2F_TARGETS	-0.810124	0.687984	0.785118
HALLMARK_ESTROGEN_RESPONSE_LATE	-0.746579	0.75154	0.847592
HALLMARK_IL2_STAT5_SIGNALING	-0.627445	0.931907	0.955961
HALLMARK_ALLOGRAFT_REJECTION	-0.620762	0.928862	0.926006
HALLMARK_EPITHELIAL_MESENCHYMAL_TRANSITION	2.09765	0.00556586	0.0634681
HALLMARK_MITOTIC_SPINDLE	1.92035	0.0136719	0.0944952
HALLMARK_ANGIOGENESIS	1.73553	0.0185185	0.165166
HALLMARK_MYOGENESIS	1.67393	0.023622	0.17167
HALLMARK_IL6_JAK_STAT3_SIGNALING	1.61509	0.0313112	0.181594
HALLMARK_KRAS_SIGNALING_UP	1.40629	0.107422	0.382223
HALLMARK_HYPOXIA	1.3923	0.0952381	0.348822
HALLMARK_SPERMATOGENESIS	1.37628	0.11412	0.326179
HALLMARK_ANDROGEN_RESPONSE	1.35991	0.121622	0.31012
HALLMARK_HEDGEHOG_SIGNALING	1.26455	0.182377	0.398767
HALLMARK_TGF_BETA_SIGNALING	1.2588	0.178054	0.370543
HALLMARK_UV_RESPONSE_DN	1.24275	0.217557	0.36129
HALLMARK_COMPLEMENT	1.23569	0.180934	0.341059
HALLMARK_COAGULATION	1.22659	0.236402	0.327633
HALLMARK_APICAL_JUNCTION	1.19888	0.224242	0.338276
HALLMARK_APICAL_SURFACE	1.18881	0.254582	0.32878
HALLMARK_WNT_BETA_CATENIN_SIGNALING	1.11753	0.322382	0.393919
HALLMARK_BILE_ACID_METABOLISM	0.97097	0.458	0.579948
HALLMARK_G2M_CHECKPOINT	0.959551	0.508738	0.566228
HALLMARK_PROTEIN_SECRETION	0.955465	0.482906	0.543215
HALLMARK_ESTROGEN_RESPONSE_EARLY	0.90362	0.573146	0.590971
HALLMARK_NOTCH_SIGNALING	0.705739	0.818	0.839245

## Sheet: T2D-HAEC 2Gy vs 0Gy
Table S3. Gene sets associated with each comparison
Pathway	NES	NOM p-val	FDR q-val
HALLMARK_INTERFERON_ALPHA_RESPONSE	-4.89281	0	0
HALLMARK_OXIDATIVE_PHOSPHORYLATION	-4.74446	0	0
HALLMARK_INTERFERON_GAMMA_RESPONSE	-4.10966	0	0
HALLMARK_MTORC1_SIGNALING	-3.10914	0	0
HALLMARK_MYC_TARGETS_V1	-2.83771	0	0
HALLMARK_ADIPOGENESIS	-1.95369	0.00205339	0.0288633
HALLMARK_UNFOLDED_PROTEIN_RESPONSE	-1.95187	0.00978474	0.02474
HALLMARK_FATTY_ACID_METABOLISM	-1.88714	0.00835073	0.0331285
HALLMARK_ESTROGEN_RESPONSE_LATE	-1.76076	0.0242424	0.0622169
HALLMARK_REACTIVE_OXYGEN_SPECIES_PATHWAY	-1.74655	0.0293542	0.0593252
HALLMARK_DNA_REPAIR	-1.72031	0.0241935	0.0624272
HALLMARK_GLYCOLYSIS	-1.67446	0.0204499	0.0716591
HALLMARK_CHOLESTEROL_HOMEOSTASIS	-1.44312	0.111111	0.190149
HALLMARK_PI3K_AKT_MTOR_SIGNALING	-1.42891	0.100616	0.190653
HALLMARK_INFLAMMATORY_RESPONSE	-1.31022	0.155819	0.28599
HALLMARK_HEME_METABOLISM	-1.3095	0.150376	0.269223
HALLMARK_IL2_STAT5_SIGNALING	-1.29956	0.15914	0.263004
HALLMARK_XENOBIOTIC_METABOLISM	-1.24499	0.205374	0.30676
HALLMARK_PEROXISOME	-1.21095	0.226908	0.326009
HALLMARK_MYC_TARGETS_V2	-1.07196	0.347741	0.494698
HALLMARK_ESTROGEN_RESPONSE_EARLY	-1.05125	0.374291	0.503041
HALLMARK_KRAS_SIGNALING_DN	-1.04865	0.388211	0.48368
HALLMARK_HYPOXIA	-1.02202	0.38125	0.499956
HALLMARK_APOPTOSIS	-0.977183	0.477137	0.546006
HALLMARK_UV_RESPONSE_UP	-0.933755	0.491228	0.586738
HALLMARK_ALLOGRAFT_REJECTION	-0.898849	0.609856	0.615584
HALLMARK_P53_PATHWAY	-0.879138	0.591954	0.620752
HALLMARK_ANDROGEN_RESPONSE	-0.762914	0.754352	0.767768
HALLMARK_G2M_CHECKPOINT	2.46654	0.002	0.00716687
HALLMARK_MITOTIC_SPINDLE	1.90722	0.0144628	0.092673
HALLMARK_TNFA_SIGNALING_VIA_NFKB	1.7796	0.014	0.128828
HALLMARK_WNT_BETA_CATENIN_SIGNALING	1.77557	0.0143443	0.0998227
HALLMARK_ANGIOGENESIS	1.57858	0.0323232	0.20732
HALLMARK_E2F_TARGETS	1.46699	0.0698152	0.277541
HALLMARK_SPERMATOGENESIS	1.40792	0.108384	0.30566
HALLMARK_KRAS_SIGNALING_UP	1.38603	0.10978	0.292378
HALLMARK_UV_RESPONSE_DN	1.3452	0.120833	0.307717
HALLMARK_COMPLEMENT	1.34351	0.132383	0.280209
HALLMARK_HEDGEHOG_SIGNALING	1.32694	0.156627	0.271184
HALLMARK_IL6_JAK_STAT3_SIGNALING	1.3019	0.169734	0.274766
HALLMARK_COAGULATION	1.20846	0.23	0.363137
HALLMARK_APICAL_SURFACE	1.12468	0.300403	0.445896
HALLMARK_EPITHELIAL_MESENCHYMAL_TRANSITION	1.09929	0.322134	0.452301
HALLMARK_MYOGENESIS	0.984221	0.463074	0.602025
HALLMARK_BILE_ACID_METABOLISM	0.889181	0.588561	0.727087
HALLMARK_TGF_BETA_SIGNALING	0.869846	0.637081	0.718515
HALLMARK_NOTCH_SIGNALING	0.781021	0.748031	0.820643
HALLMARK_APICAL_JUNCTION	0.727268	0.823762	0.856993
HALLMARK_PROTEIN_SECRETION	0.689754	0.859794	0.860004

## Sheet: HAEC 0.1Gy vs 0Gy
Table S3. Gene sets associated with each comparison
Pathway	NES	NOM p-val	FDR q-val
HALLMARK_INFLAMMATORY_RESPONSE	1.46126	0.0772201	0.354026
HALLMARK_ALLOGRAFT_REJECTION	1.49715	0.0686071	0.36797
HALLMARK_BILE_ACID_METABOLISM	1.60222	0.0460922	0.379277
HALLMARK_ADIPOGENESIS	1.50506	0.0623742	0.445353
HALLMARK_KRAS_SIGNALING_UP	1.77978	0.0242915	0.47239
HALLMARK_PEROXISOME	1.63533	0.0410678	0.491432
HALLMARK_ESTROGEN_RESPONSE_EARLY	-1.21168	0.239669	0.7193
HALLMARK_HEME_METABOLISM	1.23705	0.209393	0.741373
HALLMARK_COMPLEMENT	1.1974	0.227969	0.754951
HALLMARK_G2M_CHECKPOINT	-1.25573	0.182731	0.823796
HALLMARK_P53_PATHWAY	0.69424	0.868041	0.854056
HALLMARK_XENOBIOTIC_METABOLISM	0.720374	0.805068	0.854509
HALLMARK_APOPTOSIS	0.789695	0.704453	0.859741
HALLMARK_GLYCOLYSIS	0.834293	0.655039	0.864093
HALLMARK_INTERFERON_ALPHA_RESPONSE	0.810108	0.700952	0.865107
HALLMARK_EPITHELIAL_MESENCHYMAL_TRANSITION	1.05738	0.351064	0.875316
HALLMARK_OXIDATIVE_PHOSPHORYLATION	0.726344	0.829175	0.882289
HALLMARK_ANDROGEN_RESPONSE	-1.5096	0.0792683	0.888235
HALLMARK_MYC_TARGETS_V1	0.74428	0.790948	0.895719
HALLMARK_UNFOLDED_PROTEIN_RESPONSE	0.834929	0.685484	0.908208
HALLMARK_TNFA_SIGNALING_VIA_NFKB	-0.673597	0.862004	0.944478
HALLMARK_INTERFERON_GAMMA_RESPONSE	1.06284	0.374	0.946866
HALLMARK_UV_RESPONSE_DN	0.915314	0.561644	0.948613
HALLMARK_MTORC1_SIGNALING	0.887948	0.595825	0.950623
HALLMARK_DNA_REPAIR	0.837544	0.656687	0.952875
HALLMARK_KRAS_SIGNALING_DN	-0.728772	0.820084	0.955707
HALLMARK_PROTEIN_SECRETION	0.854028	0.661258	0.972694
HALLMARK_HYPOXIA	1.08591	0.343137	0.97672
HALLMARK_ESTROGEN_RESPONSE_LATE	-1.32114	0.167015	0.986398
HALLMARK_MITOTIC_SPINDLE	-0.505788	0.984405	0.987034
HALLMARK_MYOGENESIS	0.923611	0.519531	0.996209
HALLMARK_UV_RESPONSE_UP	-0.758057	0.760479	0.999863
HALLMARK_COAGULATION	0.958111	0.488934	1
HALLMARK_FATTY_ACID_METABOLISM	0.944948	0.512146	1
HALLMARK_E2F_TARGETS	-0.771393	0.771825	1
HALLMARK_APICAL_JUNCTION	-0.858005	0.610672	1
HALLMARK_IL2_STAT5_SIGNALING	-0.876567	0.629779	1
HALLMARK_SPERMATOGENESIS	-0.954065	0.474227	1
HALLMARK_PI3K_AKT_MTOR_SIGNALING	-0.995114	0.436508	1

## Sheet: HAEC 0.5Gy vs 0Gy
Table S3. Gene sets associated with each comparison
Pathway	NES	NOM p-val	FDR q-val
HALLMARK_UV_RESPONSE_UP	-1.30811	0.164	0.572064
HALLMARK_INFLAMMATORY_RESPONSE	1.4258	0.106	0.640188
HALLMARK_E2F_TARGETS	-1.32544	0.155279	0.664932
HALLMARK_SPERMATOGENESIS	-1.36305	0.119691	0.766171
HALLMARK_TGF_BETA_SIGNALING	1.10632	0.31893	0.773213
HALLMARK_ESTROGEN_RESPONSE_EARLY	1.13468	0.310757	0.780949
HALLMARK_P53_PATHWAY	-1.45486	0.0848861	0.783747
HALLMARK_IL6_JAK_STAT3_SIGNALING	1.43048	0.0804124	0.834864
HALLMARK_KRAS_SIGNALING_DN	1.13872	0.307547	0.855244
HALLMARK_PEROXISOME	0.800014	0.718941	0.875607
HALLMARK_TNFA_SIGNALING_VIA_NFKB	0.765704	0.733333	0.893545
HALLMARK_IL2_STAT5_SIGNALING	1.19278	0.24283	0.911274
HALLMARK_G2M_CHECKPOINT	0.803835	0.705653	0.911375
HALLMARK_APOPTOSIS	-1.02313	0.388211	0.923479
HALLMARK_APICAL_SURFACE	-0.980622	0.475	0.928645
HALLMARK_HEME_METABOLISM	-1.06556	0.368421	0.931776
HALLMARK_APICAL_JUNCTION	1.14366	0.287425	0.948039
HALLMARK_CHOLESTEROL_HOMEOSTASIS	0.808491	0.698603	0.950248
HALLMARK_COAGULATION	-0.584184	0.956436	0.951085
HALLMARK_MYC_TARGETS_V2	-1.10811	0.307843	0.956927
HALLMARK_FATTY_ACID_METABOLISM	0.696193	0.872549	0.958723
HALLMARK_PI3K_AKT_MTOR_SIGNALING	0.824779	0.663202	0.966203
HALLMARK_OXIDATIVE_PHOSPHORYLATION	-0.627196	0.918327	0.969872
HALLMARK_HYPOXIA	0.651318	0.895492	0.970039
HALLMARK_XENOBIOTIC_METABOLISM	-0.676633	0.886228	0.97563
HALLMARK_ESTROGEN_RESPONSE_LATE	1.21617	0.240326	0.975914
HALLMARK_MYOGENESIS	1.26519	0.194882	0.981493
HALLMARK_ALLOGRAFT_REJECTION	0.523821	0.981595	0.983666
HALLMARK_MYC_TARGETS_V1	-0.715125	0.83301	0.985817
HALLMARK_UNFOLDED_PROTEIN_RESPONSE	0.582544	0.944672	0.99228
HALLMARK_INTERFERON_GAMMA_RESPONSE	0.886535	0.582846	0.995601
HALLMARK_EPITHELIAL_MESENCHYMAL_TRANSITION	1.58256	0.0556701	1
HALLMARK_KRAS_SIGNALING_UP	1.44076	0.0966469	1
HALLMARK_REACTIVE_OXYGEN_SPECIES_PATHWAY	0.954476	0.475904	1
HALLMARK_MTORC1_SIGNALING	0.924918	0.530992	1
HALLMARK_INTERFERON_ALPHA_RESPONSE	0.909916	0.55332	1
HALLMARK_UV_RESPONSE_DN	0.902988	0.591489	1
HALLMARK_MITOTIC_SPINDLE	0.830265	0.692464	1
HALLMARK_DNA_REPAIR	0.825602	0.66736	1
HALLMARK_GLYCOLYSIS	-0.735888	0.810757	1
HALLMARK_ANDROGEN_RESPONSE	-0.776054	0.729508	1
HALLMARK_ADIPOGENESIS	-0.793957	0.695473	1
HALLMARK_BILE_ACID_METABOLISM	-0.809213	0.693252	1
HALLMARK_COMPLEMENT	-0.843463	0.667391	1
HALLMARK_PROTEIN_SECRETION	-1.46512	0.0985325	1

## Sheet: HAEC 2Gy vs 0Gy
Table S3. Gene sets associated with each comparison
Pathway	NES	NOM p-val	FDR q-val
HALLMARK_ESTROGEN_RESPONSE_LATE	1.50843	0.0759754	0.361085
HALLMARK_MYOGENESIS	1.53564	0.0484496	0.424078
HALLMARK_E2F_TARGETS	-1.76177	0.0214425	0.437348
HALLMARK_DNA_REPAIR	1.5848	0.0546875	0.506447
HALLMARK_MTORC1_SIGNALING	0.984654	0.446541	0.718244
HALLMARK_CHOLESTEROL_HOMEOSTASIS	1.16097	0.241449	0.729029
HALLMARK_IL2_STAT5_SIGNALING	1.00521	0.429423	0.729344
HALLMARK_ESTROGEN_RESPONSE_EARLY	1.28592	0.156942	0.742597
HALLMARK_HYPOXIA	1.05035	0.380081	0.756379
HALLMARK_EPITHELIAL_MESENCHYMAL_TRANSITION	1.01651	0.417822	0.765081
HALLMARK_REACTIVE_OXYGEN_SPECIES_PATHWAY	1.22284	0.217391	0.781707
HALLMARK_FATTY_ACID_METABOLISM	1.17238	0.241164	0.800037
HALLMARK_PI3K_AKT_MTOR_SIGNALING	-1.27741	0.178782	0.805436
HALLMARK_ALLOGRAFT_REJECTION	-0.902291	0.567951	0.814932
HALLMARK_IL6_JAK_STAT3_SIGNALING	1.63151	0.0382294	0.822001
HALLMARK_UV_RESPONSE_DN	1.08952	0.344262	0.822485
HALLMARK_ADIPOGENESIS	-1.32678	0.139676	0.824226
HALLMARK_KRAS_SIGNALING_DN	1.05135	0.375258	0.828744
HALLMARK_P53_PATHWAY	-0.820705	0.684631	0.829958
HALLMARK_TNFA_SIGNALING_VIA_NFKB	-0.835021	0.645224	0.850077
HALLMARK_GLYCOLYSIS	-0.937874	0.522417	0.850764
HALLMARK_UNFOLDED_PROTEIN_RESPONSE	-0.909076	0.545064	0.854723
HALLMARK_ANDROGEN_RESPONSE	-0.848937	0.650505	0.873601
HALLMARK_HEME_METABOLISM	0.854128	0.648069	0.87792
HALLMARK_APICAL_JUNCTION	0.879835	0.589691	0.881294
HALLMARK_KRAS_SIGNALING_UP	0.791009	0.746562	0.89036
HALLMARK_OXIDATIVE_PHOSPHORYLATION	-0.948207	0.512146	0.89102
HALLMARK_PEROXISOME	0.749756	0.818182	0.908006
HALLMARK_TGF_BETA_SIGNALING	0.811109	0.702869	0.908076
HALLMARK_UV_RESPONSE_UP	-1.19397	0.223735	0.923111
HALLMARK_COAGULATION	0.704784	0.851626	0.924691
HALLMARK_INFLAMMATORY_RESPONSE	0.667596	0.89117	0.926462
HALLMARK_XENOBIOTIC_METABOLISM	-1.05705	0.367742	0.946427
HALLMARK_INTERFERON_ALPHA_RESPONSE	0.591307	0.954639	0.949862
HALLMARK_APOPTOSIS	-0.953891	0.497917	0.950806
HALLMARK_APICAL_SURFACE	-1.13531	0.302905	0.955804
HALLMARK_INTERFERON_GAMMA_RESPONSE	-0.570988	0.965235	0.964415
HALLMARK_MYC_TARGETS_V1	-0.657516	0.896484	0.980672
HALLMARK_COMPLEMENT	-0.970876	0.467091	0.986333
HALLMARK_BILE_ACID_METABOLISM	-0.598437	0.952569	0.989814
HALLMARK_MYC_TARGETS_V2	-0.681313	0.851562	1
HALLMARK_MITOTIC_SPINDLE	-0.987124	0.465291	1
HALLMARK_SPERMATOGENESIS	-1.06812	0.35743	1
HALLMARK_G2M_CHECKPOINT	-1.33216	0.155602	1
HALLMARK_PROTEIN_SECRETION	-1.37729	0.109937	1
